# Supplementary material for: Triazole vs. triazolium carbene ligands in the site-selective cyclometallation of o-carboranes by M(iii) (M = Ir, Rh) complexes
Source: Royal Society of Chemistry journal article supplement (doi:10.1039/c8dt02296h), 2018-01-01

# **Triazole vs Triazolium Carbene Ligands in the Site-Selective Cyclometallation of *o*-Carboranes by M(III) (M=Ir,Rh) Complexes**

**María Frutos,<sup>[a]</sup> Mar Gómez-Gallego,<sup>\*,[a]</sup> Elena A. Giner,<sup>[a]</sup> Miguel A. Sierra,<sup>\*,[a]</sup> Carmen Ramírez de Arellano<sup>[b]</sup>**

<sup>a</sup>Departamento de Química Orgánica, Facultad de Ciencias Químicas, Centro de Innovación en Química Avanzada (ORFEO-CINQA). Universidad Complutense, 28040 Madrid, Spain.

<sup>b</sup>Departamento de Química Orgánica, Facultad de Química, Centro de Innovación en Química Avanzada (ORFEO-CINQA). Universidad de Valencia, 46100-Valencia, Spain.

## **Contents**

- 1. Experimental General**
- 2. General procedure for the synthesis of 1,2,3-triazoles 2**
- 3. Synthesis of metallacycles 3 and 4**
- 4. General procedure for the synthesis of triazolium salts 5**
- 5. General procedure for the synthesis of MIC carbenes**
- 6. Synthesis of metallacycles 6**
- 7. Synthesis of compound 7**
- 8. Synthesis of compound 8**
- 9. Single crystal X-ray diffraction results and discussion**
- 10. Electrochemical Studies**

## 1. Experimental General

Unless noted otherwise, all manipulations were carried out under an argon atmosphere using standard Schlenk techniques. CH<sub>2</sub>Cl<sub>2</sub> was dried by passage through solvent purification columns containing activated alumina. MeCN and toluene were HPLC grade and were used without further purification. All reagents were obtained from commercial sources and used without further purification, unless noted otherwise. Flash column chromatography was performed using silica gel (Merck, n° 9385, 230-400 mesh). <sup>1</sup>H and <sup>13</sup>C{<sup>1</sup>H} and <sup>11</sup>B{<sup>1</sup>H} NMR spectra were recorded at 300 or 500 MHz (<sup>1</sup>H NMR), at 75 or 125 MHz (<sup>13</sup>C{<sup>1</sup>H}NMR) and at 160 MHz (<sup>11</sup>B{<sup>1</sup>H} NMR) using CDCl<sub>3</sub> and acetone-*d*<sub>6</sub>, as solvents with the residual solvent signal as internal reference (CDCl<sub>3</sub>, 7.26 and 77.2 ppm), (acetone-*d*<sub>6</sub>, 2.05 and 29.84 ppm). The following abbreviations are used to describe peak patterns when appropriate: s (singlet), d (doublet), t (triplet), q (quadruplet), m (multiplet), quint (quintet), sept (septet), ddt (doublet of doublet of triplets) and br (broad). High-resolution mass spectrometry (HRMS) by the ESI technique was performed with an Agilent 6500 accurate mass apparatus with a Q-TOF analyser. IR spectra were recorded on a MIR (8000-400 cm<sup>-1</sup>) spectrometer as solid films by slow evaporation of the solvent using the attenuated total reflectance (ATR) technique. Cyclic voltammograms were recorded using a Metrohm Autolab Potentiostat model PGSTAT302N with a glassy carbon working electrode, Ag/AgCl 3 M as reference and a Pt wire counter electrode. All the measurements were performed under Ar, at room temperature from CH<sub>3</sub>CN solutions containing 0.1 M [NBu<sub>4</sub>]PF<sub>6</sub> as supporting electrolyte, with analyte concentrations of 1 mM (scan rate 0.1 V/s).

Phenylacetylene **1a** and 1-hexyne **1b** were obtained from commercial sources and used without any further purification. *o*-Carboranylmethyl azide was synthesized from *o*-carborane in two steps as previously described.<sup>1</sup> Compounds **1c**,<sup>2</sup> **1d**,<sup>3</sup> **2a**,<sup>1c</sup> **2c**,<sup>4</sup> [IrCp\*Cl<sub>2</sub>]<sub>2</sub><sup>5</sup> and [RhCp\*Cl<sub>2</sub>]<sub>2</sub><sup>5</sup> were prepared following previously reported methods.

## 2. General procedure for the synthesis of 1,2,3-triazoles 2

A mixture of organic azide (1.10 equiv), alkyne (1.00–1.50 equiv) and  $\text{Cu}(\text{OAc})_2 \cdot \text{H}_2\text{O}$  (0.08 equiv) was stirred in toluene at 50 °C overnight. The reaction was allowed to reach rt. The crude was filtered through a plug of celite. The solvent was removed under *vacuum* to afford the corresponding reaction products, which were purified through a short pad of  $\text{SiO}_2$  when needed.

### Compound 2b

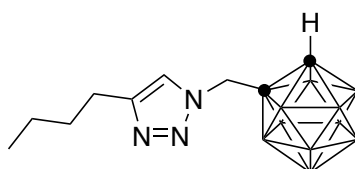

Following the general procedure, a mixture of azide (300 mg, 1.50 mmol, 1.00 equiv), alkyne **1b** (371 mg, 4.50 mmol, 3.00 equiv) and  $\text{Cu}(\text{OAc})_2 \cdot \text{H}_2\text{O}$  (24 mg, 0.12 mmol, 0.08 equiv) was stirred in toluene (20 mL) at 50 °C overnight. The crude was diluted in  $\text{CH}_2\text{Cl}_2$  and filtered through a plug of celite. The solvent was removed under *vacuum* and the resulting residue was purified ( $\text{SiO}_2$ , Hex/AcOEt 8:2) to yield **2b** as a white solid (372 mg, 88%).

$^1\text{H}$  NMR (500 MHz,  $\text{CDCl}_3$ )  $\delta$  7.35 (s, 1H,  $\text{N}_3\text{C}=\text{CH}$ ), 4.97 (s, 2H,  $\text{NCH}_2$ ), 3.87 (br s, 1H, CH carborane), 2.74 (t,  $J = 7.64$  Hz, 2H,  $\text{CH}_2$ ), 1.67 (quint,  $J = 7.64$  Hz, 2H,  $\text{CH}_2$ ), 1.39 (sep,  $J = 7.37$  Hz, 2H,  $\text{CH}_2$ ), 0.95 (t,  $J = 7.37$  Hz, 3H,  $\text{CH}_3$ ), 2.85–0.82 (m, 10H, BH carborane).  $^{13}\text{C}\{^1\text{H}\}$  NMR (75 MHz,  $\text{CDCl}_3$ )  $\delta$  149.9 (C,  $\text{N}_3\text{C}=\text{CH}$ , seen in HMBC), 122.4 (CH,  $\text{N}_3\text{C}=\text{CH}$ , seen in HMQC), 71.6 (C, carborane), 58.8 (CH, carborane), 53.9 ( $\text{NCH}_2$ ), 31.4 ( $\text{CH}_2$ ), 25.3 ( $\text{CH}_2$ ), 22.4 ( $\text{CH}_2$ ), 13.9 ( $\text{CH}_3$ ).  $^{11}\text{B}\{^1\text{H}\}$  NMR (160 MHz,  $\text{CDCl}_3$ )  $\delta$  -1.1, -4.4, -9.5, -11.7, -12.4. IR ( $\text{CH}_2\text{Cl}_2$ )  $\nu_{\text{max}}$  2959, 2923, 2586, 1460, 1225, 1047, 726. HRMS (ESI)  $m/z$  calculated for  $\text{C}_9\text{H}_{24}\text{B}_{10}\text{N}_3$ : 282.29725  $[\text{M}+\text{H}]^+$ , found: 282.29606.

## Compound 2c

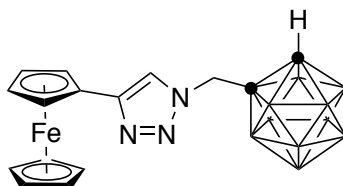

Following the general procedure, a mixture of azide (200 mg, 1.00 mmol, 1.10 equiv), alkyne **1c** (192 mg, 0.91 mmol, 1.00 equiv) and  $\text{Cu}(\text{OAc})_2 \cdot \text{H}_2\text{O}$  (15 mg, 0.07 mmol, 0.08 equiv) in toluene (15 mL) was stirred at 50 °C overnight. The reaction was allowed to reach rt. The crude was filtered through a plug of celite. The solvent was removed under *vacuum* and the resulting residue was purified ( $\text{SiO}_2$ , Hex/AcOEt 8:2) to yield **2c** as an orange solid (338 mg, 91%).

$^1\text{H}$  NMR (300 MHz,  $\text{CDCl}_3$ )  $\delta$  7.50 (s, 1H,  $\text{N}_3\text{C}=\text{CH}$ ), 5.00 (s, 2H,  $\text{NCH}_2$ ), 4.76 (br s, 2H, Cp), 4.36 (br s, 2H, Cp), 4.09 (s, 5H, Cp), 3.91 (br s, 1H, CH carborane), 3.29–0.99 (m, 10H, BH carborane).  $^{13}\text{C}\{^1\text{H}\}$  NMR (75 MHz,  $\text{CDCl}_3$ )  $\delta$  148.3 (C,  $\text{N}_3\text{C}=\text{CH}$ ), 119.8 (CH,  $\text{N}_3\text{C}=\text{CH}$ ), 74.1 (C, Cp), 71.7 (C, carborane), 69.8 (5CH, Cp), 69.2 (2CH, Cp), 66.9 (2CH, Cp), 58.9 (CH, carborane), 54.0 ( $\text{NCH}_2$ ).  $^{11}\text{B}\{^1\text{H}\}$  NMR (160 MHz,  $\text{CDCl}_3$ )  $\delta$  -0.6, -1.5, -3.9, -4.8, -9.0, -12.1, -12.9. IR ( $\text{CH}_2\text{Cl}_2$ )  $\nu_{\text{max}}$  3050, 2925, 2855, 2598, 1711, 1463, 1225, 1047, 823. HRMS (ESI)  $m/z$  calculated for  $\text{C}_{15}\text{H}_{24}\text{B}_{10}\text{N}_3\text{Fe}$ : 410.23251  $[\text{M}+\text{H}]^+$ , found: 410.23326.

## Compound 2d

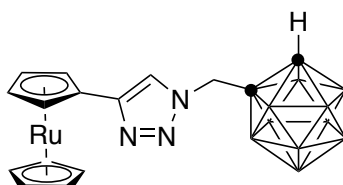

Following the general procedure, a mixture of azide (86 mg, 0.43 mmol, 1.10 equiv), alkyne

**1d** (100 mg, 0.39 mmol, 1.00 equiv) and Cu(OAc)<sub>2</sub>·H<sub>2</sub>O (6 mg, 0.03 mmol, 0.08 equiv) in toluene (10 mL) was stirred at 50 °C overnight. The reaction was allowed to reach rt. The crude was filtered through a plug of celite. The solvent was removed under *vacuum* and the resulting residue was purified (SiO<sub>2</sub>, Hex/AcOEt 7:3) to yield **2d** as a white solid (146 mg, 82%).

<sup>1</sup>H NMR (300 MHz, CDCl<sub>3</sub>) δ 7.43 (s, 1H, N<sub>3</sub>C=CH), 5.14 (t, *J* = 1.69 Hz, 2H, Cp), 4.95 (s, 2H, NCH<sub>2</sub>), 4.68 (t, *J* = 1.69 Hz, 2H, Cp), 4.48 (s, 5H, Cp), 3.88 (br s, 1H, CH carborane), 3.12–0.64 (m, 10H, BH carborane). <sup>13</sup>C{<sup>1</sup>H} NMR (75 MHz, CDCl<sub>3</sub>) δ 147.6 (C, N<sub>3</sub>C=CH), 120.0 (CH, N<sub>3</sub>C=CH), 77.7 (C, Cp), 71.7 (C, carborane), 71.6 (5CH, Cp), 71.1 (2CH, Cp), 69.4 (2CH, Cp), 58.9 (CH, carborane), 53.9 (NCH<sub>2</sub>). <sup>11</sup>B{<sup>1</sup>H} NMR (160 MHz, CDCl<sub>3</sub>) δ –1.1, –4.3, –9.4, –12.4. IR (CH<sub>2</sub>Cl<sub>2</sub>) ν<sub>max</sub> 2580, 1717, 1334, 1224, 1102, 811, 738. HRMS (ESI) *m/z* calculated for C<sub>15</sub>H<sub>24</sub>B<sub>10</sub>N<sub>3</sub>Ru: 456.20141 [M+H]<sup>+</sup>, found: 456.20171.

### 3. Synthesis of metallacycles **3** and **4**

#### Compound **3a**

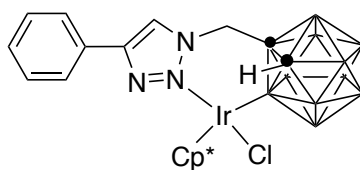

A mixture of triazole **2a** (50 mg, 0.17 mmol, 1.00 equiv), NaOAc (41 mg, 0.50 mmol, 3.00 equiv) and [IrCl<sub>2</sub>(Cp\*)]<sub>2</sub> (66 mg, 0.08 mmol, 0.50 equiv) in CH<sub>2</sub>Cl<sub>2</sub> (6.5 mL) was stirred at rt overnight. The crude was filtered through a pad of celite. The solvent was removed under *vacuum* and the resulting residue was purified (SiO<sub>2</sub>, Hex/AcOEt 8:2) to yield **3a** as a yellow solid (79 mg, 74%).

**<sup>1</sup>H NMR** (300 MHz, CDCl<sub>3</sub>) δ 7.79 (s, 1H, N<sub>3</sub>C=CH), 7.75–7.72 (m, 2H, Ar), 7.50–7.38 (m, 5H, Ar), 6.06 (d, *J* = 14.48 Hz, 1H, NCH<sub>2</sub>), 5.06 (br s, 1H, CH carborane), 4.66 (d, *J* = 14.48 Hz, 1H, NCH<sub>2</sub>), 1.76 (s, 15H, Cp\*), 3.26–0.63 (m, 9H, BH carborane). **<sup>13</sup>C{<sup>1</sup>H} NMR** (125 MHz, *d*<sub>6</sub>-acetone) δ 149.0 (C, N<sub>3</sub>C=CH), 130.1 (2CH, Ar), 130.0 (C, Ar), 129.9 (CH, Ar), 126.8 (CH, N<sub>3</sub>C=CH), 126.4 (2CH, Ar), 93.5 (5C, Cp\*), 69.1 (C, carborane), 63.5 (CH, carborane), 55.2 (NCH<sub>2</sub>), 9.2 (5CH<sub>3</sub>, Cp\*). **<sup>11</sup>B{<sup>1</sup>H} NMR** (160 MHz, *d*<sub>6</sub>-acetone) δ –3.9, –5.4, –9.8, –10.6, –12.2, –13.3. **IR (acetone)** *v*<sub>max</sub> 2957, 2573, 1466, 1092, 1018, 810, 759, 690. **HRMS (ESI)** *m/z* calculated for C<sub>21</sub>H<sub>33</sub>B<sub>10</sub>N<sub>3</sub>Ir: 628.32939 [M–Cl]<sup>+</sup>, found: 628.33059

### Compound 3b

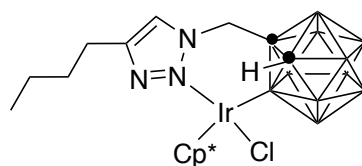

A mixture of triazole **2b** (40 mg, 0.14 mmol, 1.00 equiv), NaOAc (35 mg, 0.43 mmol, 3.00 equiv) and [IrCl<sub>2</sub>(Cp\*)]<sub>2</sub> (57 mg, 0.07 mmol, 0.50 equiv) in CH<sub>2</sub>Cl<sub>2</sub> (5 mL) was stirred at rt overnight. The crude was filtered through a pad of celite. The solvent was removed under *vacuum* and the resulting residue was purified (SiO<sub>2</sub>, CH<sub>2</sub>Cl<sub>2</sub>) to yield **3b** as a yellow solid (47 mg, 52%).

**<sup>1</sup>H NMR** (500 MHz, CDCl<sub>3</sub>) δ 7.30 (s, 1H, N<sub>3</sub>C=CH), 5.93 (d, *J* = 14.50 Hz, 1H, NCH<sub>2</sub>), 5.02 (br s, 1H, CH carborane), 4.54 (d, *J* = 14.50 Hz, 1H, NCH<sub>2</sub>), 2.68 (t, *J* = 7.57 Hz, 2H, CH<sub>2</sub>), 1.70 (s, 15H, Cp\*), 1.66 (ddt, *J* = 3.30 Hz, *J* = 7.40 Hz, *J* = 10.73 Hz, 2H, CH<sub>2</sub>), 1.38 (sep, *J* = 7.40 Hz, 2H, CH<sub>2</sub>), 0.95 (t, *J* = 7.40 Hz, 3H, CH<sub>3</sub>), 3.02–1.46 (m, 9H, BH carborane). **<sup>13</sup>C{<sup>1</sup>H} NMR** (125 MHz, CDCl<sub>3</sub>) δ 149.3 (C, N<sub>3</sub>C=CH), 125.7 (CH, N<sub>3</sub>C=CH), 92.8 (5C, Cp\*), 67.7 (C, carborane), 62.8 (CH, carborane), 54.6 (NCH<sub>2</sub>), 30.7 (CH<sub>2</sub>), 25.0 (CH<sub>2</sub>), 22.2 (CH<sub>2</sub>), 13.9 (CH<sub>3</sub>), 9.1 (5CH<sub>3</sub>, Cp\*). **<sup>11</sup>B{<sup>1</sup>H} NMR** (160 MHz, *d*<sub>6</sub>-acetone) δ –

3.8, -5.2, -7.4, -11.8, -13.0. **IR** ( $\text{CH}_2\text{Cl}_2$ )  $\nu_{\text{max}}$  2957, 2924, 2581, 1458, 1033, 813. **HRMS** (ESI)  $m/z$  calculated for  $\text{C}_{19}\text{H}_{37}\text{B}_{10}\text{IrN}_3$ : 608.36060  $[\text{M}-\text{Cl}]^+$ , found: 608.36061.

### Compound 3c

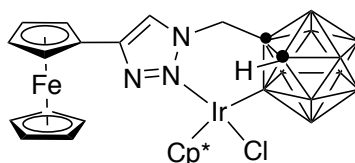

A mixture of triazole **2c** (50 mg, 0.12 mmol, 1.00 equiv),  $\text{Cs}_2\text{CO}_3$  (52 mg, 0.16 mmol, 1.30 equiv) and  $[\text{IrCl}_2(\text{Cp}^*)]_2$  (49 mg, 0.06 mmol, 0.50 equiv) in  $\text{CH}_3\text{CN}$  (2.50 mL) was stirred at 60 °C in a sealed tube for 4 days. The reaction mixture was allowed to reach rt. The crude was filtered through a pad of celite. The solvent was removed under *vacuum* and the resulting residue was purified ( $\text{SiO}_2$ , Hex/AcOEt 7:3, AcOEt,  $\text{CH}_2\text{Cl}_2$ ) to yield **3c** as an orange solid (41 mg, 44%).

**$^1\text{H}$  NMR** (300 MHz,  $\text{CDCl}_3$ )  $\delta$  7.44 (s, 1H,  $\text{N}_3\text{C}=\text{CH}$ ), 5.98 (d,  $J = 14.46$  Hz, 1H,  $\text{NCH}_2$ ), 5.07 (br s, 1H, CH carborane), 4.74 (br s, 1H, Cp), 4.61 (br s, 1H, Cp), 4.57 (d,  $J = 14.46$  Hz, 1H,  $\text{NCH}_2$ ), 4.37 (br s, 2H, Cp), 4.09 (s, 5H, Cp), 1.76 (s, 15H,  $\text{Cp}^*$ ), 3.48–0.66 (m, 9H, BH carborane).  **$^{13}\text{C}\{^1\text{H}\}$  NMR** (75 MHz,  $\text{CDCl}_3$ )  $\delta$  148.4 (C,  $\text{N}_3\text{C}=\text{CH}$ ), 123.2 (CH,  $\text{N}_3\text{C}=\text{CH}$ ), 93.0 (5C,  $\text{Cp}^*$ ), 73.3 (C, carborane), 69.9 (5CH, Cp), 69.4 (2CH, Cp), 67.7 (C, carborane), 66.9 (CH, Cp), 66.6 (CH, Cp), 62.8 (CH, carborane), 54.7 ( $\text{NCH}_2$ ), 9.1 (5 $\text{CH}_3$ ,  $\text{Cp}^*$ ).  **$^{11}\text{B}\{^1\text{H}\}$  NMR** (160 MHz,  $\text{CDCl}_3$ )  $\delta$  -3.3, -4.4, -5.5, -6.9, -7.8, -11.3, -12.3. **IR** ( $\text{CH}_2\text{Cl}_2$ )  $\nu_{\text{max}}$  3102, 3041, 2959, 2921, 2856, 2578, 1518, 1031, 817, 737. **HRMS** (ESI)  $m/z$  calculated for  $\text{C}_{25}\text{H}_{38}\text{B}_{10}\text{N}_3\text{FeIr}$ : 736.30465  $[\text{M}-\text{Cl}]^+$ , found: 736.30553.

### Compound 3d

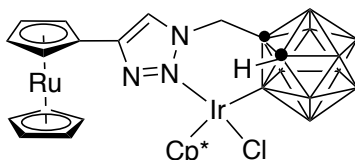

A mixture of triazole **2d** (40 mg, 0.09 mmol, 1.00 equiv), Cs<sub>2</sub>CO<sub>3</sub> (37 mg, 0.11 mmol, 1.30 equiv) and [IrCl<sub>2</sub>(Cp\*)]<sub>2</sub> (35 mg, 0.04 mmol, 0.50 equiv) in CH<sub>3</sub>CN (2 mL) was stirred at 60 °C in a sealed tube for 4 days. The reaction mixture was allowed to reach rt. The crude was filtered through a pad of celite. The solvent was removed under *vacuum* and the resulting residue was purified (SiO<sub>2</sub>, Hex/AcOEt 7:3, AcOEt, CH<sub>2</sub>Cl<sub>2</sub>) to yield **3d** as an orange solid (30 mg, 46%).

<sup>1</sup>H NMR (300 MHz, CDCl<sub>3</sub>) δ 7.38 (s, 1H, N<sub>3</sub>C=CH), 5.94 (d, *J* = 14.49 Hz, 1H, NCH<sub>2</sub>), 5.09 (dt, *J* = 1.20 Hz, 2.35 Hz, 1H, Cp), 5.32 (br s, 1H, CH carborane), 5.02 (dt, *J* = 1.20 Hz, 2.35 Hz, 1H, Cp), 4.69 (dt, *J* = 1.20 Hz, 2.35 Hz, 2H, Cp), 4.52 (d, *J* = 14.49 Hz, 1H, NCH<sub>2</sub>), 4.48 (s, 5H, Cp), 1.73 (s, 15H, Cp\*), 3.41–0.15 (m, 9H, BH carborane). <sup>13</sup>C{<sup>1</sup>H} NMR (75 MHz, CDCl<sub>3</sub>) δ 147.6 (C, N<sub>3</sub>C=CH), 123.2 (CH, N<sub>3</sub>C=CH), 92.9 (5C, Cp\*), 77.0 (C, Cp), 71.8 (5CH, Cp), 71.2 (CH, Cp), 71.1 (CH, Cp), 69.3 (CH, Cp), 69.1 (CH, Cp), 67.5 (C, carborane seen in HMBC), 62.7 (CH, carborane), 54.7 (NCH<sub>2</sub>), 9.1 (5CH<sub>3</sub>, Cp\*). <sup>11</sup>B{<sup>1</sup>H} NMR (160 MHz, *d*<sub>6</sub>-acetone) δ -3.9, -5.2, -7.6, -11.8, -12.2, -13.3. IR (CH<sub>2</sub>Cl<sub>2</sub>) ν<sub>max</sub> 3105, 3041, 2957, 2918, 2856, 2578, 1450, 1029, 811, 737. HRMS (ESI) *m/z* calculated for C<sub>25</sub>H<sub>38</sub>B<sub>10</sub>N<sub>3</sub>RuIr: 782.27386 [M-Cl]<sup>+</sup>, found: 782.27575.

### Compound 4c

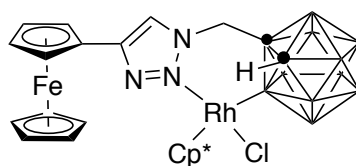

A mixture of triazole **2c** (50 mg, 0.12 mmol, 1.00 equiv), Cs<sub>2</sub>CO<sub>3</sub> (52 mg, 0.16 mmol, 1.30 equiv) and [RhCl<sub>2</sub>(Cp\*)]<sub>2</sub> (38 mg, 0.06 mmol, 0.50 equiv) in CH<sub>3</sub>CN (2.50 mL) was stirred at 65 °C in a sealed tube for 4 days. The reaction mixture was allowed to reach rt. The crude was



filtered through a pad of celite. The solvent was removed under *vacuum* and the resulting residue was purified (SiO<sub>2</sub>, Hex/AcOEt 7:3, AcOEt, CH<sub>2</sub>Cl<sub>2</sub>) to yield **4c** as an orange solid (29 mg, 35%).

<sup>1</sup>H NMR (300 MHz, CDCl<sub>3</sub>) δ 7.50 (s, 1H, N<sub>3</sub>C=CH), 5.00 (d, *J* = 14.95 Hz, 1H, NCH<sub>2</sub>), 4.76 (q, *J* = 1.66 Hz, 1H, Cp), 4.71 (q, *J* = 1.66 Hz, 1.50 Hz, 1H, Cp), 4.66 (d, *J* = 14.95 Hz, 1H, NCH<sub>2</sub>), 4.30 (t, *J* = 1.83 Hz, 2H, Cp), 4.08 (s, 5H, Cp), 3.71 (br s, 1H, CH carborane), 2.08 (s, 15H, Cp\*), 3.42–0.73 (m, 9H, BH carborane). <sup>13</sup>C{<sup>1</sup>H} NMR (75 MHz, CDCl<sub>3</sub>) δ 147.2 (C, N<sub>3</sub>C=CH), 120.5 (CH, N<sub>3</sub>C=CH), 104.0 (5C, Cp\*, *J*<sub>Rh,C</sub> = 6.54 Hz), 74.9 (C, Cp), 70.8 (C, carborane, seen in HMBC) 69.8 (5CH, Cp), 68.9 (2CH, Cp), 66.8 (2CH, Cp), 58.1 (NCH<sub>2</sub>), 56.6 (CH, carborane, *J*<sub>Rh,C</sub> = 12.13 Hz), 9.8 (5CH<sub>3</sub>, Cp\*). <sup>11</sup>B{<sup>1</sup>H} NMR (160 MHz, *d*<sub>6</sub>-acetone) δ 9.2, -1.3, -7.0, -9.4, -11.8, -16.9, -18.2, -21.6. IR (CH<sub>2</sub>Cl<sub>2</sub>) ν<sub>max</sub> 3098, 2958, 2923, 2855, 2538, 1469, 1381, 1033, 819. HRMS (ESI) *m/z* calculated for C<sub>25</sub>H<sub>38</sub>B<sub>10</sub>N<sub>3</sub>FeRh: 647.24804 [M-Cl]<sup>+</sup>, found: 647.24613.

### Compound 4d

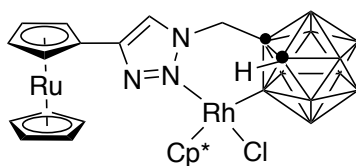

A mixture of triazole **2d** (40 mg, 0.09 mmol, 1.00 equiv), Cs<sub>2</sub>CO<sub>3</sub> (37 mg, 0.11 mmol, 1.30 equiv) and [RhCl<sub>2</sub>(Cp\*)]<sub>2</sub> (27 mg, 0.04 mmol, 0.50 equiv) in CH<sub>3</sub>CN (2 mL) was stirred at 65 °C in a sealed tube for 4 days. The reaction mixture was allowed to reach rt. The crude was filtered through a pad of celite. The solvent was removed under *vacuum* and the resulting residue was purified (SiO<sub>2</sub>, Hex/AcOEt 7:3, AcOEt, CH<sub>2</sub>Cl<sub>2</sub>) to yield **4d** as an orange solid (27 mg, 46%).

$^1\text{H NMR}$  (300 MHz,  $\text{CDCl}_3$ )  $\delta$  7.40 (s, 1H,  $\text{N}_3\text{C}=\text{CH}$ ), 5.16 (q,  $J = 1.45$  Hz, 1H, Cp), 5.12 (q,  $J = 1.45$  Hz, 1H, Cp), 4.99 (d,  $J = 14.94$  Hz, 1H,  $\text{NCH}_2$ ), 4.66 (t,  $J = 1.73$  Hz, 2H, Cp), 4.61 (d,  $J = 14.94$  Hz, 1H,  $\text{NCH}_2$ ), 4.49 (s, 5H, Cp), 3.68 (br s, 1H, CH carborane), 2.08 (s, 15H,  $\text{Cp}^*$ ), 3.11–0.50 (m, 9H, BH carborane).  $^{13}\text{C}\{^1\text{H}\}$  NMR (75 MHz,  $\text{CDCl}_3$ )  $\delta$  146.5 (C,  $\text{N}_3\text{C}=\text{CH}$ ), 120.6 (CH,  $\text{N}_3\text{C}=\text{CH}$ ), 103.9 (C,  $\text{Cp}^*$ ,  $J_{\text{Rh,C}} = 6.44$  Hz), 78.5 (C, Cp), 71.7 (5CH, Cp), 70.9 (2CH, Cp,  $J_{\text{Rh,C}} = 1.39$  Hz), 69.6 (C, carborane), 69.4 (2CH, Cp), 58.1 ( $\text{NCH}_2$ ), 56.5 (CH, carborane), 9.8 (5 $\text{CH}_3$ ,  $\text{Cp}^*$ ).  $^{11}\text{B}\{^1\text{H}\}$  NMR (160 MHz,  $\text{CDCl}_3$ )  $\delta$  9.2, -1.5, -9.5, -11.7, -18.3, -21.5. IR ( $\text{CH}_2\text{Cl}_2$ )  $\nu_{\text{max}}$  2959, 2922, 2856, 2536, 1468, 1381, 1095, 1028, 809, 735. HRMS (ESI)  $m/z$  calculated for  $\text{C}_{25}\text{H}_{38}\text{B}_{10}\text{N}_3\text{RuRh}$ : 693.21693  $[\text{M}-\text{Cl}]^+$ , found: 693.21645.

#### 4. General procedure for the synthesis of triazolium salts 5

Triazole (1.00 equiv) and Meerwein's salt (1.30 equiv) were stirred under argon at rt in anhydrous  $\text{CH}_2\text{Cl}_2$  until complete consumption of the starting material ( $^1\text{H NMR}$  analysis). The reaction was quenched with some drops of methanol. The volatiles were removed under *vacuum* to afford the corresponding reaction product without further purification. In some cases, the product was washed with a mixture of  $\text{CH}_2\text{Cl}_2$ :pentane to remove traces of starting material.

#### Compound 5a

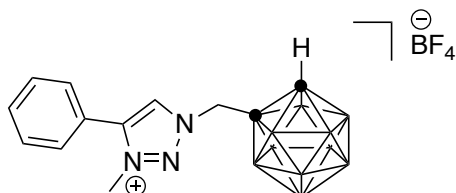

Following the general procedure, a mixture of **2a** (179 mg, 0.59 mmol, 1.00 equiv) and  $\text{Me}_3\text{OBF}_4$  (114 mg, 0.77 mmol, 1.30 equiv) in  $\text{CH}_2\text{Cl}_2$  (39 mL) was stirred under argon at rt

overnight. The reaction was quenched with some drops of methanol. The volatiles were removed under *vacuum* to yield **5a** as a white solid (220 mg, 92%).

$^1\text{H NMR}$  (300 MHz,  $d_6$ -acetone)  $\delta$  9.17 (s, 1H,  $\text{N}_3\text{C}=\text{CH}$ ), 7.88–7.86 (m, 2H, Ar), 7.85–7.83 (m, 3H, Ar), 5.84 (s, 2H,  $\text{NCH}_2$ ), 5.08 (br s, 1H, CH carborane), 4.59 (s, 3H,  $\text{CH}_3$ ), 3.10–1.29 (m, 10H, BH carborane).  $^{13}\text{C}\{^1\text{H}\}$  NMR (75 MHz,  $d_6$ -acetone)  $\delta$  145.1 (C,  $\text{N}_3\text{C}=\text{CH}$ ), 132.8 (CH, Ar), 131.2 (CH,  $\text{N}_3\text{C}=\text{CH}$ ), 130.6 (2CH, Ar), 130.4 (2CH, Ar), 123.2 (C, Ar), 71.1 (C, carborane), 63.0 (CH, carborane), 56.7 ( $\text{CH}_2$ ,  $\text{NCH}_2$ ), 40.2 ( $\text{CH}_3$ ,  $\text{NCH}_3$ ).  $^{11}\text{B}\{^1\text{H}\}$  NMR (160 MHz,  $d_6$ -acetone)  $\delta$  -0.6, -1.0, -2.2, -4.2, -9.0, -11.6, -12.5. IR ( $d_6$ -acetone)  $\nu_{\text{max}}$  3129, 3066, 2594, 1441, 1054, 765, 730, 697. HRMS (ESI)  $m/z$  calculated for  $\text{C}_{12}\text{H}_{22}\text{B}_{10}\text{N}_3$ : 316.28174  $[\text{M}]^+$ , found: 316.28187.

### Compound 5b

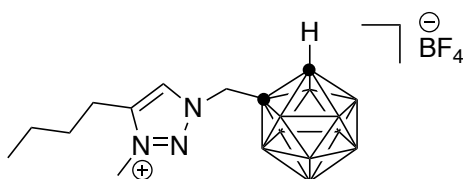

Following the general procedure, a mixture of **2b** (278 mg, 0.99 mmol, 1.00 equiv) and  $\text{Me}_3\text{OBF}_4$  (190 mg, 1.28 mmol, 1.30 equiv) in anhydrous  $\text{CH}_2\text{Cl}_2$  (33 mL) was stirred under argon at room temperature overnight. The reaction was quenched with some drops of methanol. The volatiles were removed under *vacuum* to yield **5b** as a brown solid (306 mg, 81%).

$^1\text{H NMR}$  (500 MHz,  $d_6$ -acetone)  $\delta$  8.82 (s, 1H,  $\text{N}_3\text{C}=\text{CH}$ ), 5.70 (s, 2H,  $\text{NCH}_2$ ), 5.01 (br s, 1H, CH carborane), 4.49 (s, 3H,  $\text{NCH}_3$ ), 3.08 (t,  $J = 7.77$  Hz, 2H,  $\text{CH}_2$ ), 1.81 (quint,  $J = 7.77$  Hz, 2H,  $\text{CH}_2$ ), 1.48 (sep,  $J = 7.39$  Hz, 2H,  $\text{CH}_2$ ), 0.96 (t,  $J = 7.39$  Hz, 3H,  $\text{CH}_3$ ), 2.93–1.29 (m, 10H, BH carborane).  $^{13}\text{C}\{^1\text{H}\}$  NMR (75 MHz,  $d_6$ -acetone)  $\delta$  146.8 (C,  $\text{N}_3\text{C}=\text{CH}$ ), 130.6 (CH,  $\text{N}_3\text{C}=\text{CH}$ ), 71.1 (C, carborane), 62.8 (CH, carborane), 56.3 ( $\text{NCH}_2$ ), 38.6 ( $\text{NCH}_3$ ), 29.2 ( $\text{CH}_2$ ),

23.4 (CH<sub>2</sub>), 22.5 (CH<sub>2</sub>), 13.7 (CH<sub>3</sub>). <sup>11</sup>B{<sup>1</sup>H} NMR (160 MHz, *d*<sub>6</sub>-acetone) δ 20.3, 17.4, -0.9, -2.3, -4.3, -9.1, -11.7, -12.6. IR (*d*<sub>6</sub>-acetone) ν<sub>max</sub> 2583, 845, 729. HRMS (ESI) *m/z* calculated for C<sub>10</sub>H<sub>26</sub>B<sub>10</sub>N<sub>3</sub>: 296.31295 [M]<sup>+</sup>, found: 296.31258.

### Compound 5c

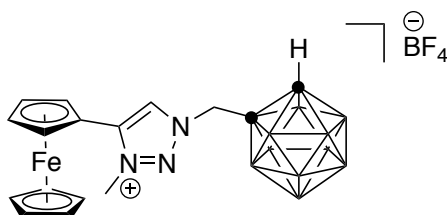

Following the general procedure, a mixture of **2c** (100 mg, 0.24 mmol, 1.00 equiv) and Me<sub>3</sub>OBF<sub>4</sub> (47 mg, 0.32 mmol, 1.30 equiv) in dry CH<sub>2</sub>Cl<sub>2</sub> (16 mL) was stirred under argon at rt overnight. The reaction was quenched with some drops of methanol. The volatiles were removed under *vacuum* to yield **5c** as an orange solid (111 mg, 90%).

<sup>1</sup>H NMR (300 MHz, *d*<sub>6</sub>-acetone) δ 9.08 (s, 1H, N<sub>3</sub>C=CH), 5.69 (s, 2H, NCH<sub>2</sub>), 5.07 (br s, 3H, CH carborane+2H Cp), 4.70 (br s, 2H, Cp), 4.59 (s, 3H, NCH<sub>3</sub>), 4.34 (s, 5H, Cp), 3.29–0.88 (m, 10H, BH carborane). <sup>13</sup>C{<sup>1</sup>H} NMR (75 MHz, *d*<sub>6</sub>-acetone) δ 146.2 (C, N<sub>3</sub>C=CH), 129.8 (CH, N<sub>3</sub>C=CH), 72.5 (2CH, Cp), 71.3 (5CH, Cp), 71.2 (C, carborane), 70.2 (2CH, Cp), 66.2 (C, Cp), 62.9 (CH, carborane), 56.5 (NCH<sub>2</sub>), 40.4 (NCH<sub>3</sub>). <sup>11</sup>B{<sup>1</sup>H} NMR (160 MHz, *d*<sub>6</sub>-acetone) δ 20.3, -1.0, -2.3, -4.3, -9.1, -11.7, -12.6. IR (*d*<sub>6</sub>-acetone) ν<sub>max</sub> 3135, 3062, 2922, 2853, 2595, 1598, 1059, 829, 754. HRMS (ESI) *m/z* calculated for C<sub>16</sub>H<sub>26</sub>B<sub>10</sub>N<sub>3</sub>Fe: 424.24820 [M]<sup>+</sup>, found: 424.24786.

### Compound 5d

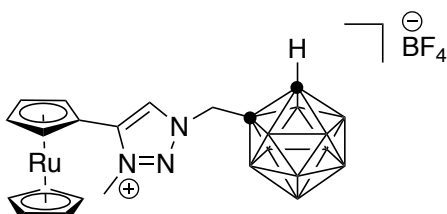

Following the general procedure, a mixture of **2d** (84 mg, 0.18 mmol, 1.00 equiv) and Me<sub>3</sub>OBF<sub>4</sub> (36 mg, 0.24 mmol, 1.30 equiv) in anhydrous CH<sub>2</sub>Cl<sub>2</sub> (12 mL) was stirred under argon at rt overnight. The reaction was quenched with some drops of methanol. The volatiles were removed under *vacuum* to yield **5d** as a white solid (82 mg, 82%).

**<sup>1</sup>H NMR** (500 MHz, *d*<sub>6</sub>-acetone) δ 8.95 (s, 1H, N<sub>3</sub>C=CH), 5.66 (s, 2H, NCH<sub>2</sub>), 5.35 (t, *J* = 1.80 Hz, 2H, Cp), 5.02 (br s, 1H, CH carborane), 4.97 (t, *J* = 1.80 Hz, 2H, Cp), 4.73 (s, 5H, Cp), 4.53 (s, 3H, NCH<sub>3</sub>), 2.95–1.40 (m, 10H, BH carborane). **<sup>13</sup>C{<sup>1</sup>H} NMR** (75 MHz, *d*<sub>6</sub>-acetone) δ 144.8 (C, N<sub>3</sub>C=CH), 130.1 (CH, N<sub>3</sub>C=CH), 74.0 (2CH, Cp), 73.2 (5CH, Cp), 72.3 (2CH, Cp), 71.2 (C, carborane), 70.1 (C, Cp), 63.0 (CH, carborane), 56.5 (NCH<sub>2</sub>), 40.3 (NCH<sub>3</sub>). **<sup>11</sup>B{<sup>1</sup>H} NMR** (160 MHz, *d*<sub>6</sub>-acetone) δ -1.0, -2.3, -4.2, -9.1, -11.7, -12.5. **IR** (*d*<sub>6</sub>-acetone)  $\nu_{\text{max}}$  3034, 2924, 2864, 1602, 1313, 1075, 818. **HRMS (ESI)** *m/z* calculated for C<sub>16</sub>H<sub>26</sub>B<sub>10</sub>N<sub>3</sub>Ru: 470.21711 [M]<sup>+</sup>, found: 470.21709.

## 5. General procedure for the synthesis of MIC carbenes

In a flask charged with 4 Å molecular sieves, a mixture of triazolium salt (1.00 equiv), NMe<sub>4</sub>Cl (1.50 equiv) and Ag<sub>2</sub>O (0.75 equiv) was stirred at rt, in CH<sub>2</sub>Cl<sub>2</sub>, in the dark, until the formation of the silver carbene (<sup>1</sup>H NMR analysis). Then, the metallic salt (1.00 equiv) was added and the reaction was stirred at rt until completion (<sup>1</sup>H NMR analysis). The reaction was filtered through a pad of Celite and the volatiles were removed under *vacuum* to afford the corresponding reaction products, which were purified through a short pad of SiO<sub>2</sub>.

## 6. Synthesis of metallacycles 6

### Compound 6a

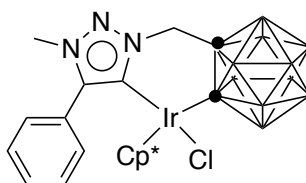

Following the general procedure, a mixture of salt **5a** (60 mg, 0.15 mmol, 1.00 equiv), NMe<sub>4</sub>Cl (24 mg, 0.22 mmol, 1.50 equiv) and Ag<sub>2</sub>O (26 mg, 0.11 mmol, 0.75 equiv) in CH<sub>2</sub>Cl<sub>2</sub> (14 mL) was stirred under argon, at rt, overnight. Next, NMe<sub>4</sub>Cl (24 mg, 0.22 mmol, 1.50 equiv) and Ag<sub>2</sub>O (26 mg, 0.11 mmol, 0.75 equiv) were added to the solution that was stirred at rt for other 24 h. [IrCl<sub>2</sub>(Cp\*)]<sub>2</sub> (53 mg, 0.07 mmol, 0.45 equiv) was added and the reaction was stirred for three hours. The resulting residue was purified (SiO<sub>2</sub>, Hex/AcOEt 7:3, CH<sub>2</sub>Cl<sub>2</sub>, CH<sub>2</sub>Cl<sub>2</sub>:9% MeOH) to yield **6a** as a yellow solid (75 mg, 79%).

**<sup>1</sup>H NMR** (500 MHz, *d*<sub>6</sub>-acetone) δ 8.02–8.00 (m, 2H, Ar), 7.56–7.48 (m, 3H, Ar), 5.10 (d, *J* = 14.57 Hz, 1H, NCH<sub>2</sub>), 4.47 (d, *J* = 14.57 Hz, 1H, NCH<sub>2</sub>), 4.00 (s, 3H, NCH<sub>3</sub>), 3.46–0.61 (m, 10H, BH carborane), 1.36 (s, 15H, CH<sub>3</sub>). **<sup>13</sup>C{<sup>1</sup>H} NMR** (125 MHz, *d*<sub>6</sub>-acetone) δ 150.7 (C, N<sub>3</sub>C=CIr), 142.1 (C, N<sub>3</sub>C=CIr), 134.1 (2CH, Ar), 130.7 (CH, Ar), 128.4 (2CH, Ar), 127.8 (C, Ar), 92.4 (C, Cp\*), 73.9 (C, carborane), 58.9 (NCH<sub>2</sub>), 48.1 (C, carborane), 38.1 (NCH<sub>3</sub>), 9.0 (5CH<sub>3</sub>, Cp\*).

**<sup>11</sup>B{<sup>1</sup>H} NMR** (160 MHz, *d*<sub>6</sub>-acetona) δ -2.8, -5.0, -7.7, -10.0, -10.4, -12.2.

**IR** (*d*<sub>6</sub>-acetone) *v*<sub>max</sub> 3061, 2958, 2916, 2855, 2620, 2561, 1439, 1072, 10267, 766, 735, 702.

**HRMS (ESI)** *m/z* calculated for C<sub>22</sub>H<sub>35</sub>B<sub>10</sub>IrN<sub>3</sub>: 642.34508 [M-Cl]<sup>+</sup>, found: 642.34594.

## Compound 6b

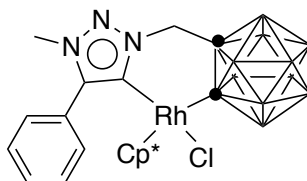

Following the general procedure, a mixture of salt **5a** (70 mg, 0.17 mmol, 1.00 equiv), NMe<sub>4</sub>Cl (29 mg, 0.26 mmol, 1.50 equiv) and Ag<sub>2</sub>O (30 mg, 0.13 mmol, 0.75 equiv) in CH<sub>2</sub>Cl<sub>2</sub> (16 mL) was stirred under argon, at rt, overnight. Next, NMe<sub>4</sub>Cl (29 mg, 0.26 mmol, 1.50 equiv) and Ag<sub>2</sub>O (30 mg, 0.13 mmol, 0.75 equiv) were added to the solution that was stirred at rt for other 24 h. [RhCl<sub>2</sub>(Cp\*)]<sub>2</sub> (43 mg, 0.07 mmol, 0.40 equiv) was added and the reaction was stirred overnight. The resulting residue was purified (SiO<sub>2</sub>, CH<sub>2</sub>Cl<sub>2</sub> to CH<sub>2</sub>Cl<sub>2</sub>:9% MeOH) to yield **6b** as a yellow solid (59 mg, 72%).

<sup>1</sup>H NMR (500 MHz, *d*<sub>6</sub>-acetone) δ 8.09–8.07 (m, 2H, Ar), 7.57–7.49 (m, 3H, Ar), 5.15 (d, *J* = 14.63 Hz, 1H, NCH<sub>2</sub>), 4.54 (d, *J* = 14.63 Hz, 1H, NCH<sub>2</sub>), 4.03 (s, 3H, NCH<sub>3</sub>), 3.31–0.55 (m, 10H, BH carborane), 1.34 (s, 15H, CH<sub>3</sub>). <sup>13</sup>C{<sup>1</sup>H} NMR (125 MHz, *d*<sub>6</sub>-acetone) δ 160.0 (C, N<sub>3</sub>C=CRh, *J*<sub>Rh,C</sub> = 51.85 Hz), 149.9 (C, N<sub>3</sub>C=CRh), 134.0 (2CH, Ar), 130.7 (CH, Ar), 128.5 (2CH, Ar), 127.9 (C, Ar), 98.9 (C, Cp\*, *J*<sub>Rh,C</sub> = 5.59 Hz), 74.6 (C, carborane), 67.7 (C, carborane), 58.9 (NCH<sub>2</sub>), 38.2 (NCH<sub>3</sub>), 9.4 (5CH<sub>3</sub>, Cp\*). <sup>11</sup>B{<sup>1</sup>H} NMR (160 MHz *d*<sub>6</sub>-acetona) δ -2.6, -4.8, -6.3, -6.3, -8.1, -9.5, -10.0, -12.2. IR (*d*<sub>6</sub>-acetone) ν<sub>max</sub> 2920, 2852, 2572, 1437, 1167, 1067, 764, 698. HRMS (ESI) *m/z* calculated for C<sub>22</sub>H<sub>35</sub>B<sub>10</sub>N<sub>3</sub>Rh: 552.28944 [M-Cl]<sup>+</sup>, found: 552.29047.

## Compound 6c

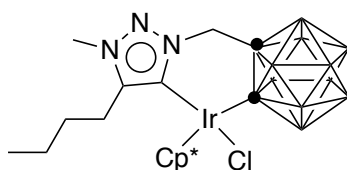

Following the general procedure, a mixture of **5b** (100 mg, 0.26 mmol, 1.00 equiv), NMe<sub>4</sub>Cl (43 mg, 0.39 mmol, 1.50 equiv) and Ag<sub>2</sub>O (45 mg, 0.20 mmol, 0.75 equiv) in CH<sub>2</sub>Cl<sub>2</sub> (24 mL) was stirred under argon, at rt, overnight. Next, NMe<sub>4</sub>Cl (43 mg, 0.39 mmol, 1.50 equiv) and Ag<sub>2</sub>O (45 mg, 0.20 mmol, 0.75 equiv) were added to the solution that was stirred at rt for other 24 h. [IrCl<sub>2</sub>(Cp\*)]<sub>2</sub> (83 mg, 0.10 mmol, 0.40 equiv) was added and the reaction was stirred for three hours. The resulting residue was purified (SiO<sub>2</sub>, Hex/AcOEt, 8:2) to yield **6c** as a yellow solid (74 mg, 54%).

<sup>1</sup>H NMR (500 MHz, CDCl<sub>3</sub>) δ 4.87 (d, *J* = 14.07 Hz, 1H, NCH<sub>2</sub>), 4.23 (d, *J* = 14.07 Hz, 1H, NCH<sub>2</sub>), 4.05 (s, 3H, NCH<sub>3</sub>), 2.92–2.86 (m, 1H, CH<sub>2</sub>), 2.67–2.61 (m, 1H, CH<sub>2</sub>), 2.01–1.90 (m, 3H, CH<sub>2</sub>), 1.59 (s, 15H, CH<sub>3</sub>), 1.53–1.42 (m, 3H, CH<sub>2</sub>), 0.98 (t, *J* = 6.91 Hz, CH<sub>3</sub>), 3.21–0.71 (m, 10H, BH carborane). <sup>13</sup>C{<sup>1</sup>H} NMR (125 MHz, CDCl<sub>3</sub>) δ 149.3 (C, N<sub>3</sub>C=CIr), 144.1 (C, N<sub>3</sub>C=CIr), 91.7 (C, Cp\*), 72.2 (C, carborane), 57.9 (NCH<sub>2</sub>), 46.5 (C, carborane), 36.8 (NCH<sub>3</sub>), 31.8 (CH<sub>2</sub>), 25.0 (CH<sub>2</sub>), 23.3 (CH<sub>2</sub>), 13.9 (CH<sub>3</sub>), 9.2 (5CH<sub>3</sub>, Cp\*). <sup>11</sup>B{<sup>1</sup>H} NMR (160 MHz, CDCl<sub>3</sub>) δ -2.6, -4.5, -5.6, -7.8, -10.0, -12.3. IR (*d*<sub>6</sub>-acetone) ν<sub>max</sub> 2958, 2922, 2855, 2620, 2560, 1453, 1351, 1029, 735. HRMS (ESI) *m/z* calculated for C<sub>20</sub>H<sub>39</sub>B<sub>10</sub>N<sub>3</sub>Ir: 622.37630 [M-Cl]<sup>+</sup>, found: 622.37753.

### Compound 6d

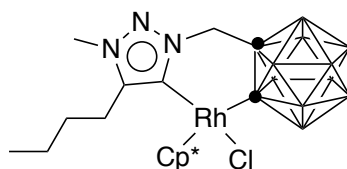

Following the general procedure, a mixture of **5b** (100 mg, 0.26 mmol, 1.00 equiv), NMe<sub>4</sub>Cl (43 mg, 0.39 mmol, 1.50 equiv) and Ag<sub>2</sub>O (45 mg, 0.20 mmol, 0.75 equiv) in CH<sub>2</sub>Cl<sub>2</sub> (24 mL) was stirred under argon, at rt, overnight. Next, NMe<sub>4</sub>Cl (43 mg, 0.39 mmol, 1.50 equiv)



and Ag<sub>2</sub>O (45 mg, 0.20 mmol, 0.75 equiv) were added to the solution that was stirred at rt for other 24 h. [RhCl<sub>2</sub>(Cp\*)]<sub>2</sub> (64 mg, 0.10 mmol, 0.40 equiv) was added and the reaction was stirred for two hours. The resulting residue was purified (SiO<sub>2</sub>, CH<sub>2</sub>Cl<sub>2</sub>) to yield **6d** as a yellow solid (101 mg, 89%).

<sup>1</sup>H NMR (300 MHz, CDCl<sub>3</sub>) δ 4.91 (d, *J* = 14.20 Hz, 1H, NCH<sub>2</sub>), 4.29 (d, *J* = 14.20 Hz, 1H, NCH<sub>2</sub>), 4.06 (s, 3H, NCH<sub>3</sub>), 3.01–2.91 (m, 1H, CH<sub>2</sub>), 2.74–2.64 (m, 1H, CH<sub>2</sub>), 2.03–1.91 (m, 2H, CH<sub>2</sub>), 1.56 (s, 15H, CH<sub>3</sub>), 1.53–1.42 (m, 2H, CH<sub>2</sub>), 0.98 (t, *J* = 7.04 Hz, CH<sub>3</sub>), 3.51–0.75 (m, 10H, BH carborane). <sup>13</sup>C{<sup>1</sup>H} NMR (75 MHz, CDCl<sub>3</sub>) δ 161.2 (C, N<sub>3</sub>C=CRh, *J*<sub>Rh,C</sub> = 50.69 Hz), 148.9 (C, N<sub>3</sub>C=CRh), 98.4 (C, Cp\*, *J*<sub>Rh,C</sub> = 5.63 Hz), 73.2 (C, carborane), 68.8 (C, carborane, seen in HMBC), 57.9 (NCH<sub>2</sub>), 36.9 (NCH<sub>3</sub>), 31.1 (CH<sub>2</sub>), 25.6 (CH<sub>2</sub>), 23.3 (CH<sub>2</sub>), 13.9 (CH<sub>3</sub>), 9.6 (5CH<sub>3</sub>, Cp\*). <sup>11</sup>B{<sup>1</sup>H} NMR (160 MHz *d*<sub>6</sub>-acetona) δ -2.3, -4.3, -6.3, -8.2, -9.6, -12.2. IR (*d*<sub>6</sub>-acetone) ν<sub>max</sub>, 2958, 2924, 2867, 2619, 2562, 1452, 1351, 1025, 735. HRMS (ESI) *m/z* calculated for C<sub>20</sub>H<sub>39</sub>B<sub>10</sub>N<sub>3</sub>Rh: 532.32065 [M-Cl]<sup>+</sup>, found: 532.32329.

## 7. Synthesis of compound 7

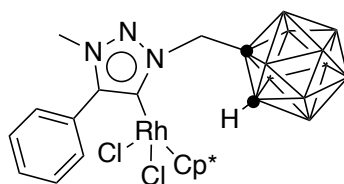

Following the general procedure, a mixture of **5a** (60 mg, 0.15 mmol, 1.00 equiv), NMe<sub>4</sub>Cl (24 mg, 0.22 mmol, 1.50 equiv) and Ag<sub>2</sub>O (26 mg, 0.11 mmol, 0.75 equiv) in CH<sub>2</sub>Cl<sub>2</sub> (14 mL) was stirred under argon, at rt, overnight. Next, [RhCl<sub>2</sub>(Cp\*)]<sub>2</sub> (41 mg, 0.07 mmol, 0.45 equiv) was added and the reaction was stirred overnight. The resulting residue was purified (SiO<sub>2</sub>, CH<sub>2</sub>Cl<sub>2</sub>:2% MeOH) to yield **7** as a yellow solid (52 mg, 60%).

<sup>1</sup>H NMR (300 MHz, CDCl<sub>3</sub>) δ 7.76–7.74 (m, 2H, Ar), 7.51–7.50 (m, 3H, Ar), 5.74 (s, 2H,

NCH<sub>2</sub>), 5.59 (br s, 1H, CH carborane), 3.89 (s, 3H, NCH<sub>3</sub>), 1.31 (s, 15H, CH<sub>3</sub>), 3.21–0.39 (m, 10H, BH carborane). **IR** (*d*<sub>6</sub>-acetone)  $\nu_{\text{max}}$  2923, 2576, 1450, 1262, 1062, 1021, 811, 730, 699. **HRMS (ESI)** *m/z* calculated for C<sub>22</sub>H<sub>36</sub>B<sub>10</sub>ClN<sub>3</sub>Rh: 589.26369 [M–Cl]<sup>+</sup>, found: 589.26400.

## 8. Synthesis of compound 8

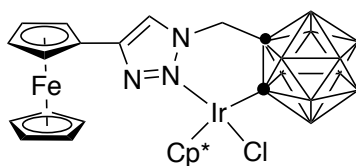

Triazole **2c** (150 mg, 0.37 mmol, 1.00 equiv) was dissolved in dry THF (9 mL) under Ar. The solution was kept at 0 °C. Then, <sup>n</sup>BuLi (solution 1.6 M in hexanes) (460 μL, 0.73 mmol, 2.00 equiv) was added dropwise. The reaction mixture was stirred at 0 °C for 1 h. Next, [IrCp\*Cl<sub>2</sub>]<sub>2</sub> (146 mg, 0.18 mmol, 0.50 equiv) was added in one portion and the resulting mixture was stirred at rt overnight. The crude was filtered through a plug of celite, and the volatiles were removed under *vacuum*. The resulting residue was purified (SiO<sub>2</sub>, Hex/AcOEt 8:2) to yield **8** as a yellow solid (106 mg, 43%).

**<sup>1</sup>H NMR** (300 MHz, CDCl<sub>3</sub>)  $\delta$  7.50 (s, 1H, N<sub>3</sub>C=CH), 6.17 (d, *J* = 14.41 Hz, 1H, NCH<sub>2</sub>), 4.69 (br s, 1H, Cp), 4.63 (br s, 1H, Cp), 4.47 (d, *J* = 14.41 Hz, 1H, NCH<sub>2</sub>), 4.37 (br s, 2H, Cp), 4.09 (s, 5H, Cp), 1.64 (s, 15H, Cp\*), 3.58–0.27 (m, 10H, BH carborane). **<sup>13</sup>C{<sup>1</sup>H} NMR** (75 MHz, CDCl<sub>3</sub>)  $\delta$  148.9 (C, N<sub>3</sub>C=CH), 123.6 (CH, N<sub>3</sub>C=CH), 91.4 (5C, Cp\*), 72.9 (C, carborane), 72.8 (C, Cp), 69.9 (5CH, Cp), 69.5 (2CH, Cp), 67.0 (CH, Cp), 66.8 (CH, Cp), 54.3 (NCH<sub>2</sub>), 53.3 (C, carborane), 9.1 (5CH<sub>3</sub>, Cp\*). **<sup>11</sup>B{<sup>1</sup>H} NMR** (160 MHz, CDCl<sub>3</sub>)  $\delta$  –2.5, –3.8, –7.1, –7.9, –9.1, –10.0, –11.7. **IR** (CH<sub>2</sub>Cl<sub>2</sub>)  $\nu_{\text{max}}$  2558, 1589, 1446, 1324, 1264, 1106, 1026, 878, 820, 735. **HRMS (ESI)** *m/z* calculated for C<sub>25</sub>H<sub>37</sub>B<sub>10</sub>N<sub>3</sub>FeIr: 736.29587 [M–Cl]<sup>+</sup>, found: 736.2971.

## 9. Single crystal X-ray diffraction results and discussion

Crystals of **3c** suitable for single crystal X-ray diffraction were grown from a slow diffusion of *n*-pentane into a Cl<sub>2</sub>CH<sub>2</sub> solution and its structure unambiguously established (Figure S1). The geometry around the iridium atom (frequently described as a *three-legged piano-stool geometry*), can be rationalized as a distorted octahedron with the cyclopentadienyl ligand occupying the three positions of a face while the opposite is occupied by a bidentated κ<sup>2</sup>-(*o*-carboranylmethyl)triazolyl moiety and a chlorine atom. The κ<sup>2</sup>-(*o*-carboranylmethyl)triazolyl moiety bonds to the iridium center through both, the carborane B(3) position and the triazolyl nitrogen atom N(2). The triazolyl moiety bonds to a ferrocenyl group through C(4) atom. The bidentated ligand and the Iridium atom form a six-membered metallacycle having a boat conformation, with dihedral angles of 45.26(15)° and 31.02(14)° between the N(1), N(2), B(3), C(1) plane (mean deviation 0.0106 Å) and the N(1)-C(3)-C(1) plane and the N(2)-Ir(1)-B(3) plane, respectively and, a trans-annular Ir(1)⋯C(3) distance of 3.469(2) Å. An intramolecular C-H⋯Cl hydrogen bond [C(3)-H(3B)⋯Cl(1): C(3)⋯Cl(1) 3.235(3) Å, H(3B)⋯Cl(1) 2.49 Å, C(3)-H(3B)⋯Cl(1) 131.6°] could contribute to stabilize the six-membered ring boat conformation. This is the first crystal structure reported for a metallacycle with a -B-C-C-N-N-M- sequence.<sup>[6]</sup>

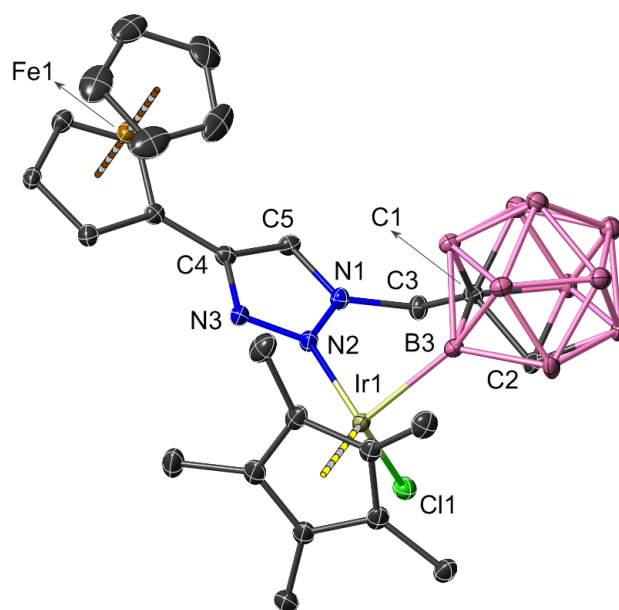

**Figure S1.** X-ray thermal ellipsoid plot for **3c** (50% probability level). Hydrogen atoms are omitted for clarity. Selected bond lengths (Å) and angles (°): Ir(1)-N(2) 2.083(2), Ir(1)-B(3) 2.086(3), Ir(1)-Cl(1) 2.4266(6), N(1)-N(2) 1.354(3), N(2)-N(3) 1.315(3), N(3)-C(4) 1.365(3), C(4)-C(5) 1.382(3), N(1)-C(3) 1.457(3), C(1)-C(3) 1.521(3), C(1)-B(3) 1.793(3), N(2)-Ir(1)-B(3) 85.08(9), Ir(1)-N(2)-N(1) 128.47(15), N(2)-N(1)-C(3) 123.01(19), N(1)-C(3)-C(1) 110.93(19), C(3)-C(1)-B(3) 115.39(19) and C(1)-B(3)-Ir(1) 118.42(16).

Crystals of **6a** suitable for single crystal X-ray diffraction were grown from a  $\text{Cl}_2\text{CH}_2$  /  $\text{Et}_2\text{O}$  solution and its structure unambiguously established (Figure S3). The crystal presents two independent molecules of **6a**. The geometry around the iridium atom (frequently described as a *three-legged piano-stool geometry*), can be rationalized as a distorted octahedron with the cyclopentadienyl ligand occupying the three positions of a face while the opposite is occupied by a bidentate  $\kappa^2$ -(*o*-carboranylmethyl)triazolyl moiety and a chlorine atom. The  $\kappa^2$ -(*o*-carboranylmethyl)triazolyl moiety bonds to the iridium center through both the carborane carbon atom in the C(2) position and the C(5) triazolylidene carbon atom. The triazolylidene moiety bonds to a phenyl group through C(4) atom. In both independent

molecules, the bidentated ligand and the Iridium atom form a six-membered metallacycle having a boat conformation. The Ir(1) labeled molecule shows dihedral angles of  $43.5(9)^\circ$  and  $29.6(4)^\circ$  between the N(1), C(5), C(2), C(1) plane (mean deviation  $0.0162 \text{ \AA}$ ) and the N(1)-C(3)-C(1) plane and the C(5)-Ir(1)-C(2) plane, respectively, together with a trans-annular Ir(1) $\cdots$ C(3) distance of  $3.417(11) \text{ \AA}$ . Similar values are observed for the Ir(2) labeled molecule.

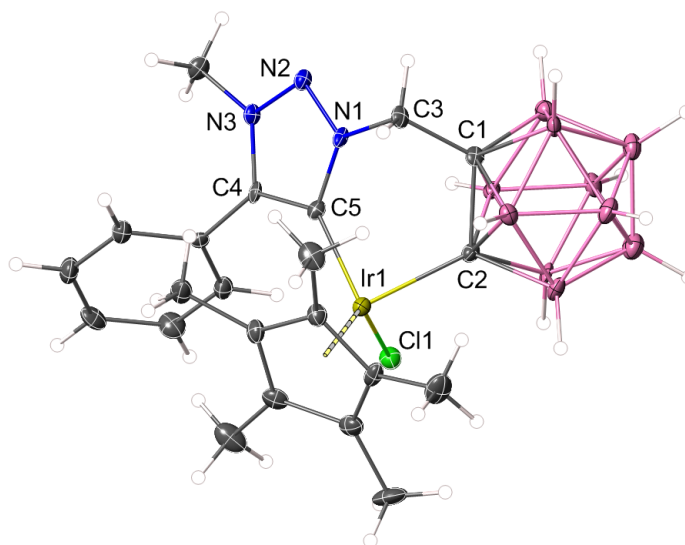

**Figure S3.** X-ray thermal ellipsoid plot for **6a** (40% probability level). Selected bond lengths ( $\text{\AA}$ ) and angles ( $^\circ$ ): Ir(1)-C(2)  $2.125(10)$ , Ir(1)-C(5)  $2.026(10)$ , Ir(1)-Cl(1)  $2.421(2)$ , N(1)-N(2)  $1.338(12)$ , N(2)-N(3)  $1.298(11)$ , N(3)-C(4)  $1.365(13)$ , C(4)-C(5)  $1.404(13)$ , N(1)-C(3)  $1.464(12)$ , C(1)-C(3)  $1.508(14)$ , C(1)-C(2)  $1.698(14)$ , C(2)-Ir(1)-C(5)  $88.5(4)$ , Ir(1)-C(2)-C(1)  $118.4(6)$ , C(2)-C(1)-C(3)  $116.3(8)$ , N(1)-C(3)-C(1)  $111.2(8)$ , C(3)-N(1)-C(5)  $127.5(9)$  and N(1)-C(5)-Ir(1)  $123.0(7)$ .

### Single crystal X-ray diffraction experimental data

**Crystal data for compound 3c:**  $\text{C}_{25}\text{H}_{37}\text{B}_{10}\text{ClFeIrN}_3$ ,  $M = 771.17$ , monoclinic,  $a = 10.7280(10)$ ,  $b = 12.2730(10)$ ,  $c = 23.362(2) \text{ \AA}$ ,  $\beta = 97.602(6)^\circ$ ,  $V = 3048.9(5) \text{ \AA}^3$ , space

group  $P_{2(1)/n}$ ,  $Z = 4$ ,  $T = 120(2)$  K,  $\lambda = 0.71073$  Å,  $D_{\text{calcd}} = 1.680$  gcm<sup>-3</sup>,  $\mu = 4.946$  cm<sup>-1</sup>, 31205 reflections measured, 8899 unique ( $R_{\text{int}} = 0.0422$ ), orange crystals obtained by CH<sub>2</sub>Cl<sub>2</sub> evaporation, crystal structure solved by direct methods and all non-hydrogen atoms refined anisotropically on  $F^2$  using the programs SHELXS-2013 and SHELXL-2017/2<sup>8</sup> carborane C-H atom was located in a difference Fourier synthesis and refined as free, methyl group hydrogen atoms were included as *rigid* and others using a *riding* model, GOF = 1.039,  $R(F_o, I > 2\sigma(I)) = 0.0273$ ,  $R_w(F_o^2, \text{all data}) = 0.0671$ .

**Crystal data for compound 6a:** C<sub>22</sub>H<sub>35</sub>B<sub>10</sub>ClIrN<sub>3</sub>,  $M = 677.28$ , orthorhombic,  $a = 31.5605(9)$ ,  $b = 8.6073(2)$ ,  $c = 20.2755(5)$  Å,  $V = 5507.9(2)$  Å<sup>3</sup>, space group  $P_{na2(1)}$ ,  $Z = 8$ ,  $T = 120(2)$  K,  $\lambda = 0.71073$  Å,  $D_{\text{calcd}} = 1.634$  gcm<sup>-3</sup>,  $\mu = 4.964$  cm<sup>-1</sup>, 43285 reflections measured, 15524 unique ( $R_{\text{int}} = 0.0707$ ), yellow crystals obtained by CH<sub>2</sub>Cl<sub>2</sub>/Et<sub>2</sub>O evaporation, crystal structure solved by direct methods and all non-hydrogen atoms refined anisotropically on  $F^2$  using the programs SHELXT<sup>[9]</sup> and SHELXL-2017/2<sup>[8]</sup>, methyl group hydrogen atoms were included as *rigid* and others using a *riding* model, GOF = 1.053,  $R(F_o, I > 2\sigma(I)) = 0.0501$ ,  $R_w(F_o^2, \text{all data}) = 0.1059$ .

CCDC-1824868 and CCDC-1824870 contain the full supplementary crystallographic data for compounds **3c** and **7a**. These data are provided free of charge by The Cambridge Crystallographic Data Centre.

## 10. Electrochemical Studies

**Table S1.**<sup>a</sup> Cyclic voltammetry data of triazoles **2a–c**, triazolium salts **5a–c** and Ir(III) complexes **3a–c**, **6a** and **6c**.

| Compound   | Oxidation                     |           | Reduction |
|------------|-------------------------------|-----------|-----------|
|            | $E_{pa1}$ ( $\Delta V_{mV}$ ) | $E_{pa2}$ | $E_{pc}$  |
| <b>3a</b>  | 1.02** (60)                   | 1.61      | -1.84     |
| <b>3b</b>  | 1.00** (70)                   | 1.60      | -1.84     |
| <b>3c*</b> | 1.07** (100)                  | 1.68      | -1.82     |
| <b>6a</b>  | 1.12                          | -         | -1.64     |
| <b>6c</b>  | 1.06                          | -         | -1.60     |
| <b>2a</b>  |                               |           | -1.84     |
| <b>2b</b>  |                               |           | <i>b</i>  |
| <b>2c</b>  |                               |           | -1.81     |
| <b>5a</b>  |                               |           | -1.42     |
| <b>5b</b>  |                               |           | -1.53     |
| <b>5c</b>  |                               |           | -1.40     |

<sup>a</sup> Data (V) obtained from  $1 \times 10^{-3}$  M acetonitrile solutions, containing 0.1 M  $[N(nBu)_4]ClO_4$  as supporting electrolyte at 20 °C. Potentials are relative to Ag/AgCl. \*  $E_{1/2} Fc/Fc^+ = 0.54$  V for compound **3c**. \*\* $E_{1/2}$ . <sup>b</sup> not observed in the acetonitrile window frame.

### CVs of compounds 2a,2c

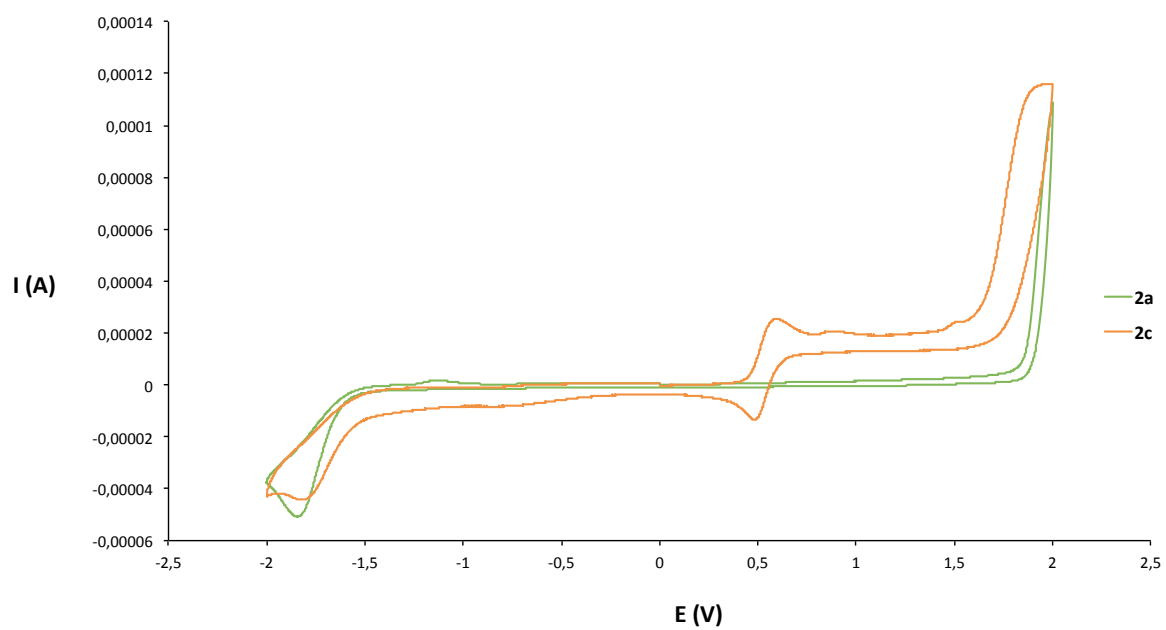

### CVs of compounds 3a-c and 8

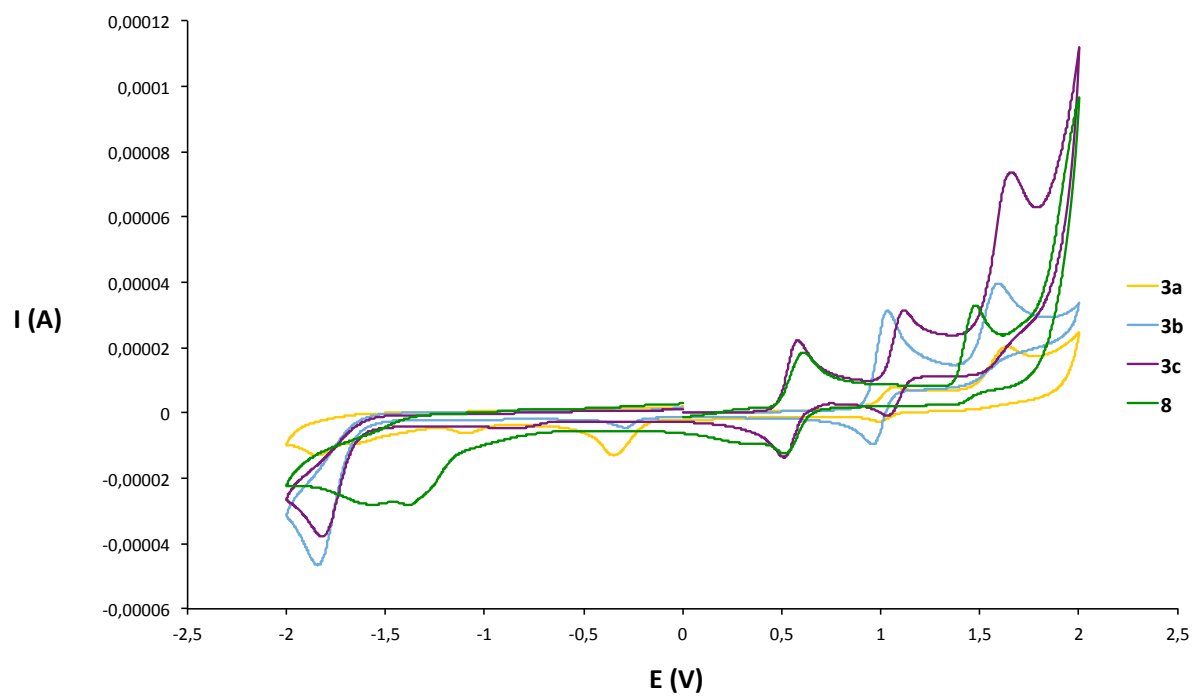



### CVs of compounds 5a,5c

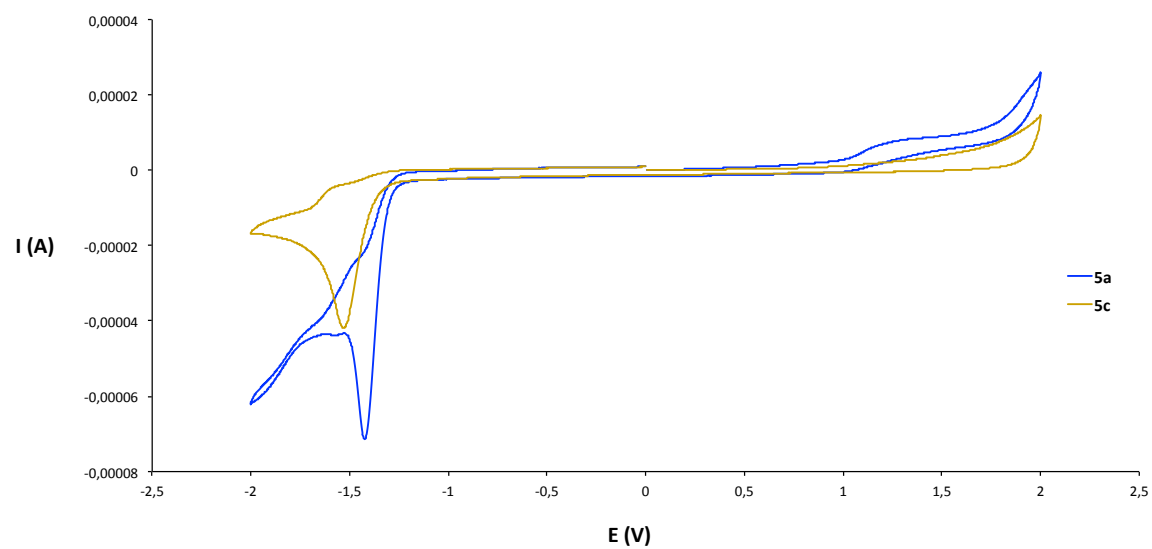

### CVs of compounds 6a,6c

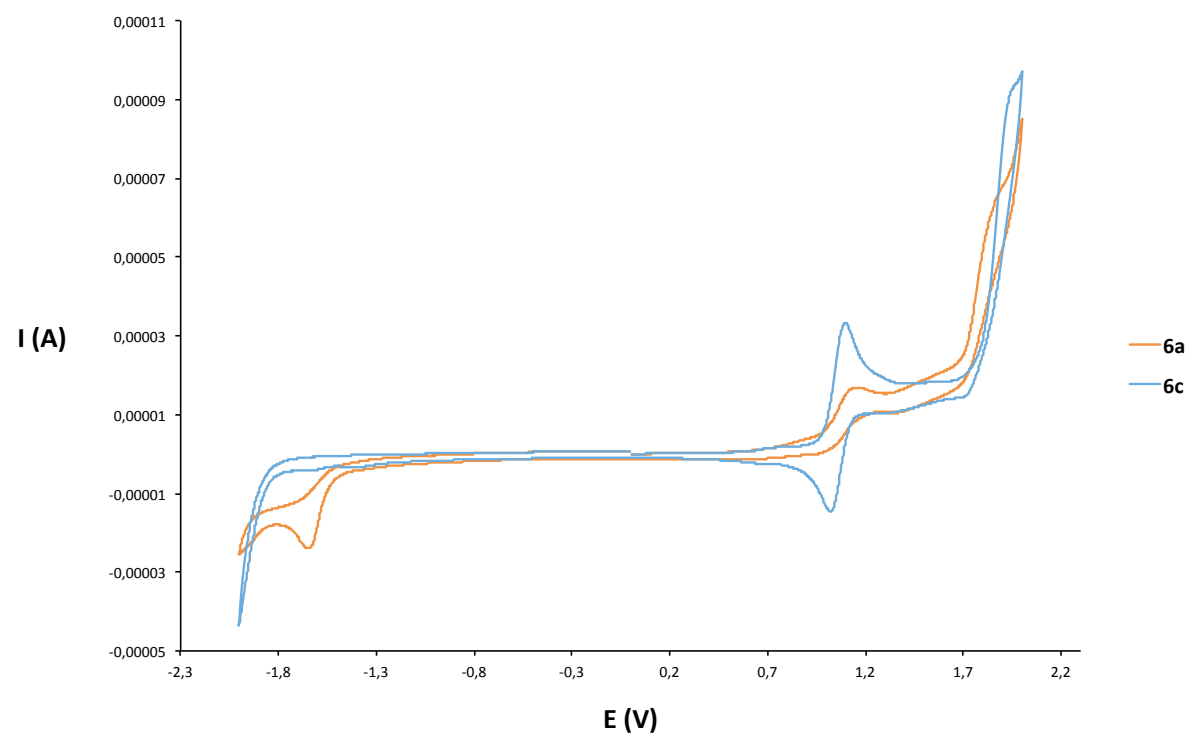

## References

1. a) S. Hoogendoorn, E. D. Mock, A. Strijland, W. E. Donker-Koopman, H. van den Elst, R. J. B. H. N van den Berg, J. M. F. G. Aerts, G. A. van der Marel, H. S. Overkleef, *Eur. J. Org. Chem.* **2015**, 4437–4446. b) V. N. Kalinin, E. G. Rys, A. A. Tyutyunov, Z. A. Starikova, A. A. Korlyukov, V. A. Ol'shevskaya, D. D. Sung, A. B. Ponomaryov, P. V. Petrovskii, E. Hey-Hawkins, *Dalton. Trans.* **2005**, 903–908. c) V. A. Ol'shevskaya, A. V. Makarenhov, E. G.; Kononova, P. V. Petrovskii, E. V. Verbitskiy, G. L. Rusinov, V. N. Kalinin, V. N. Charushin, *Dokl. Chem.* **2010**, 434, 245–248.
2. G. Doisneau, G. Balavoine, T. Fillebeen-Khan, *J. Organomet. Chem.* **1992**, 425, 113–117.
3. M. D. Rausch, A. Siegel, *J. Org. Chem.* **1969**, 34, 1974–1976.
4. V. A. Ol'shevskaya, A. V. Makarenkov, Y. A. Borisov, Y. V. Anayev, E. G. Kononova, V. N. Kalinin, A. B. Ponomaryov, *Polyhedron.* **2018**, 141, 181–190.
5. R. G. Ball, W. A. G. Graham, D. M. Heinekey, J. K. Hoyano, A. D. McMaster, B. M. Mattson, S. T. Michel, *Inorg. Chem.* **1990**, 29, 2023–2025.
6. CSD version 4.39 (November 2017; 931,333 entries).
7. CSD, V5.39, 14 hits analyzed.
8. G. M. Sheldrick, *Acta Cryst.*, **2015**, C71, 3–8.
9. G. M. Sheldrick, *Acta Cryst.*, **2015**, A71, 3–8.

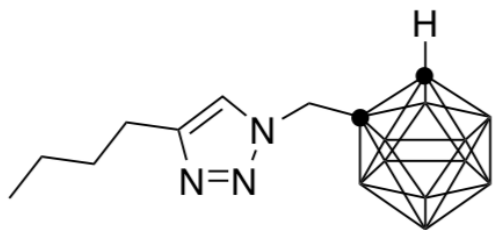

**2b**

**$^1\text{H}$  NMR (500 MHz,  $\text{CDCl}_3$ )**

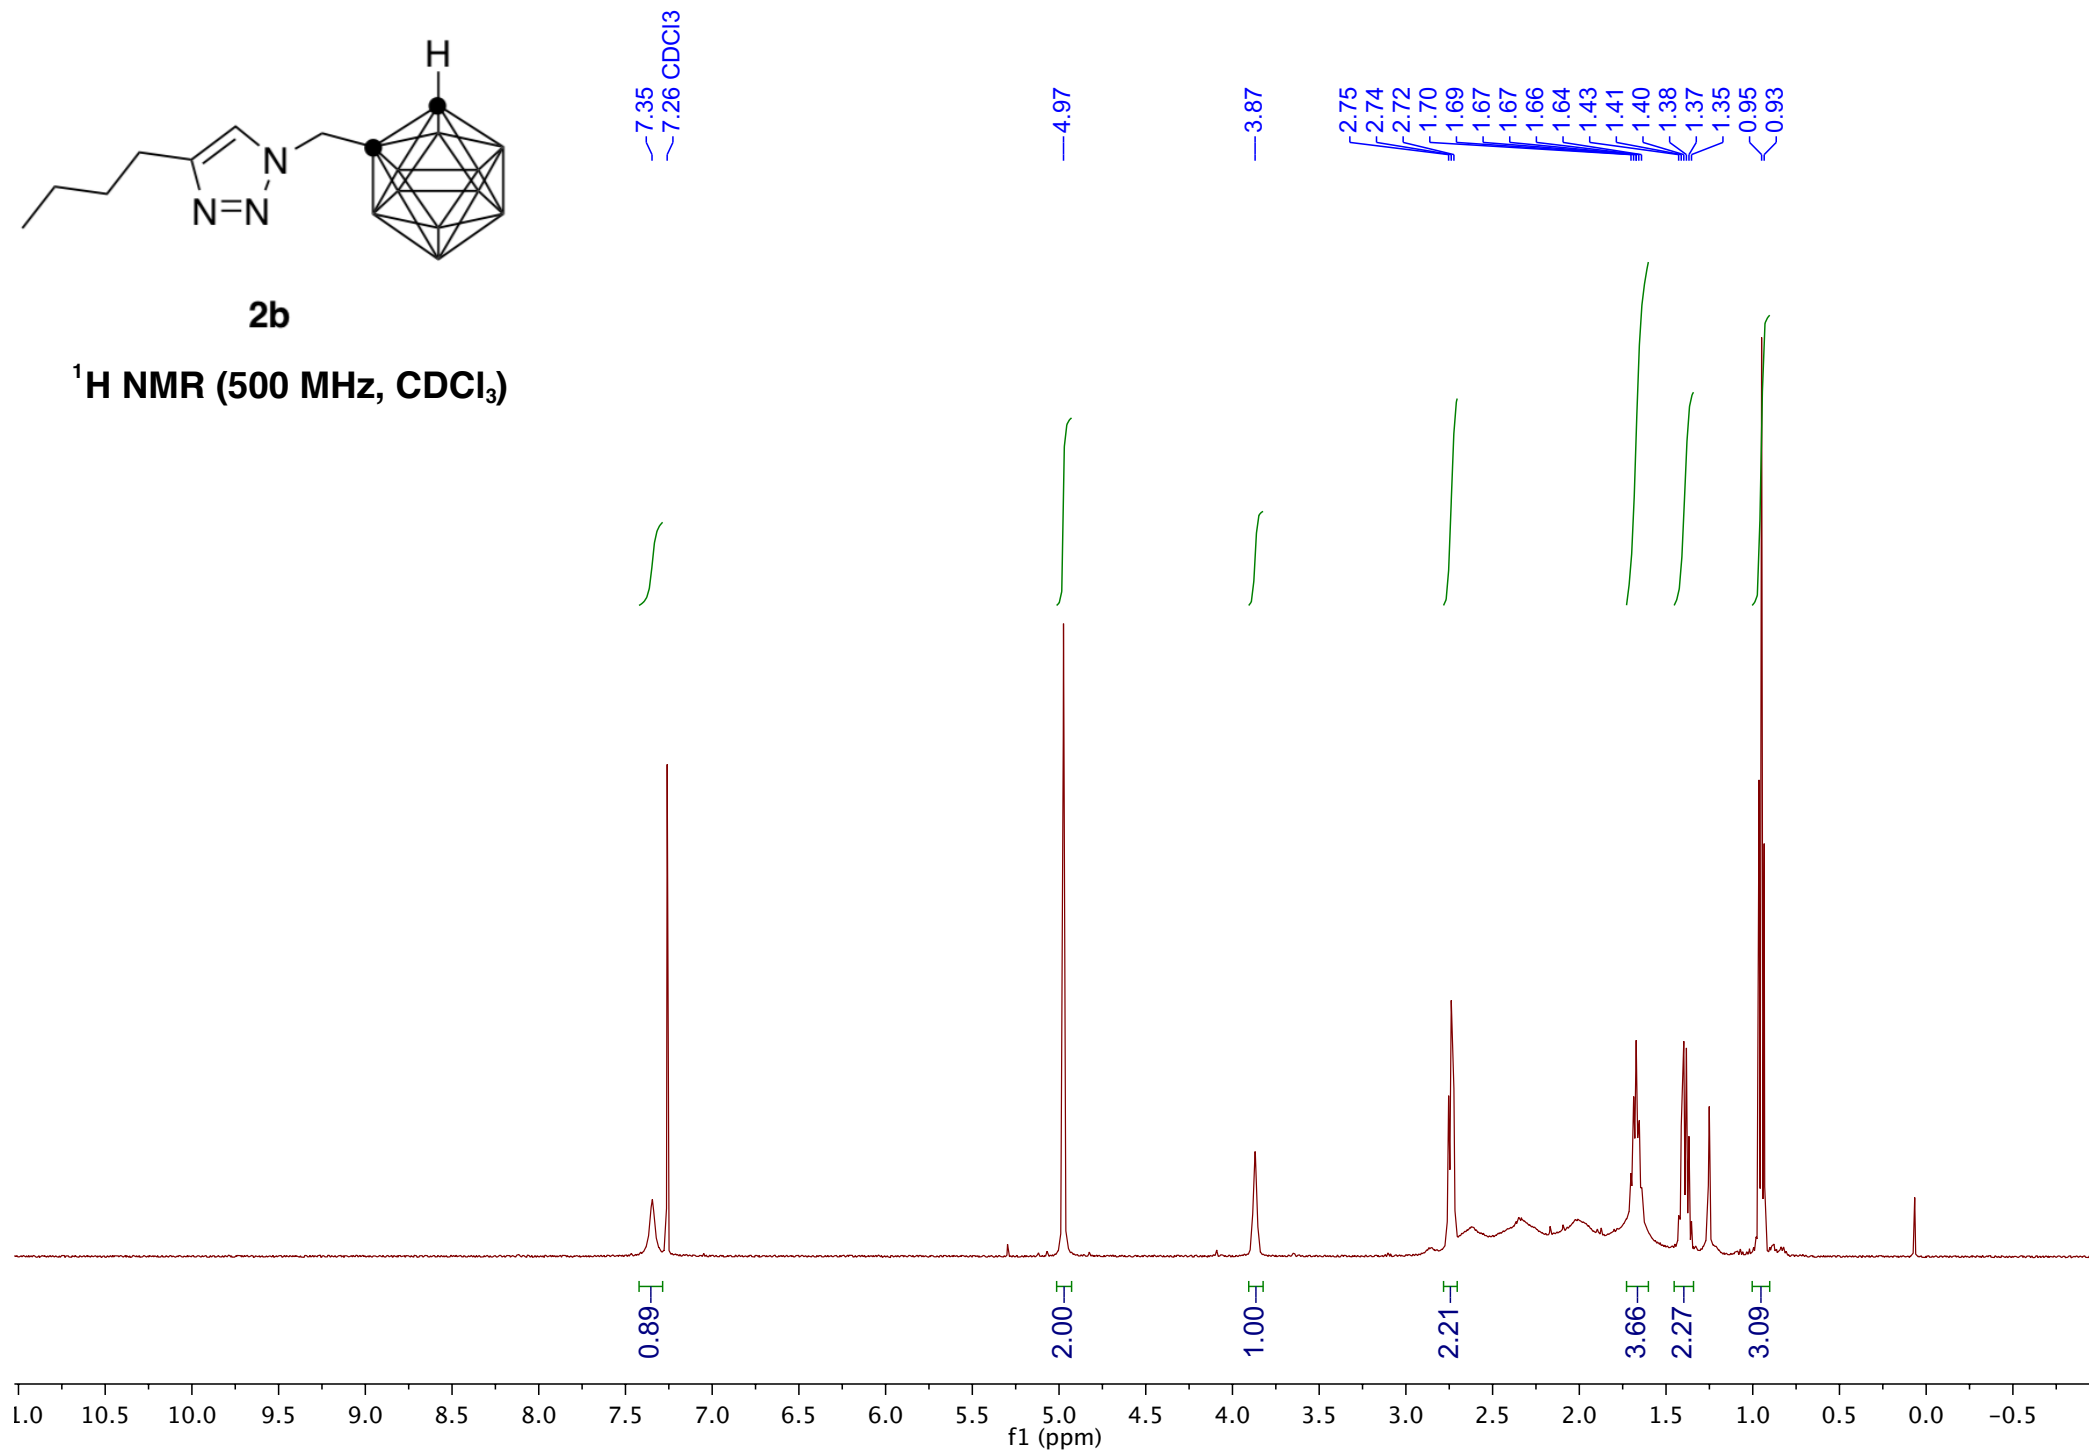

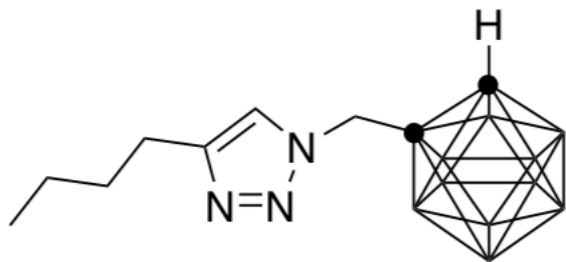

**2b**

<sup>13</sup>C{<sup>1</sup>H} NMR (75 MHz, CDCl<sub>3</sub>)

77.6 CDCl<sub>3</sub>  
77.2 CDCl<sub>3</sub>  
76.7 CDCl<sub>3</sub>  
71.6

—58.8

—53.9

—31.4

—25.3

—22.4

—13.9

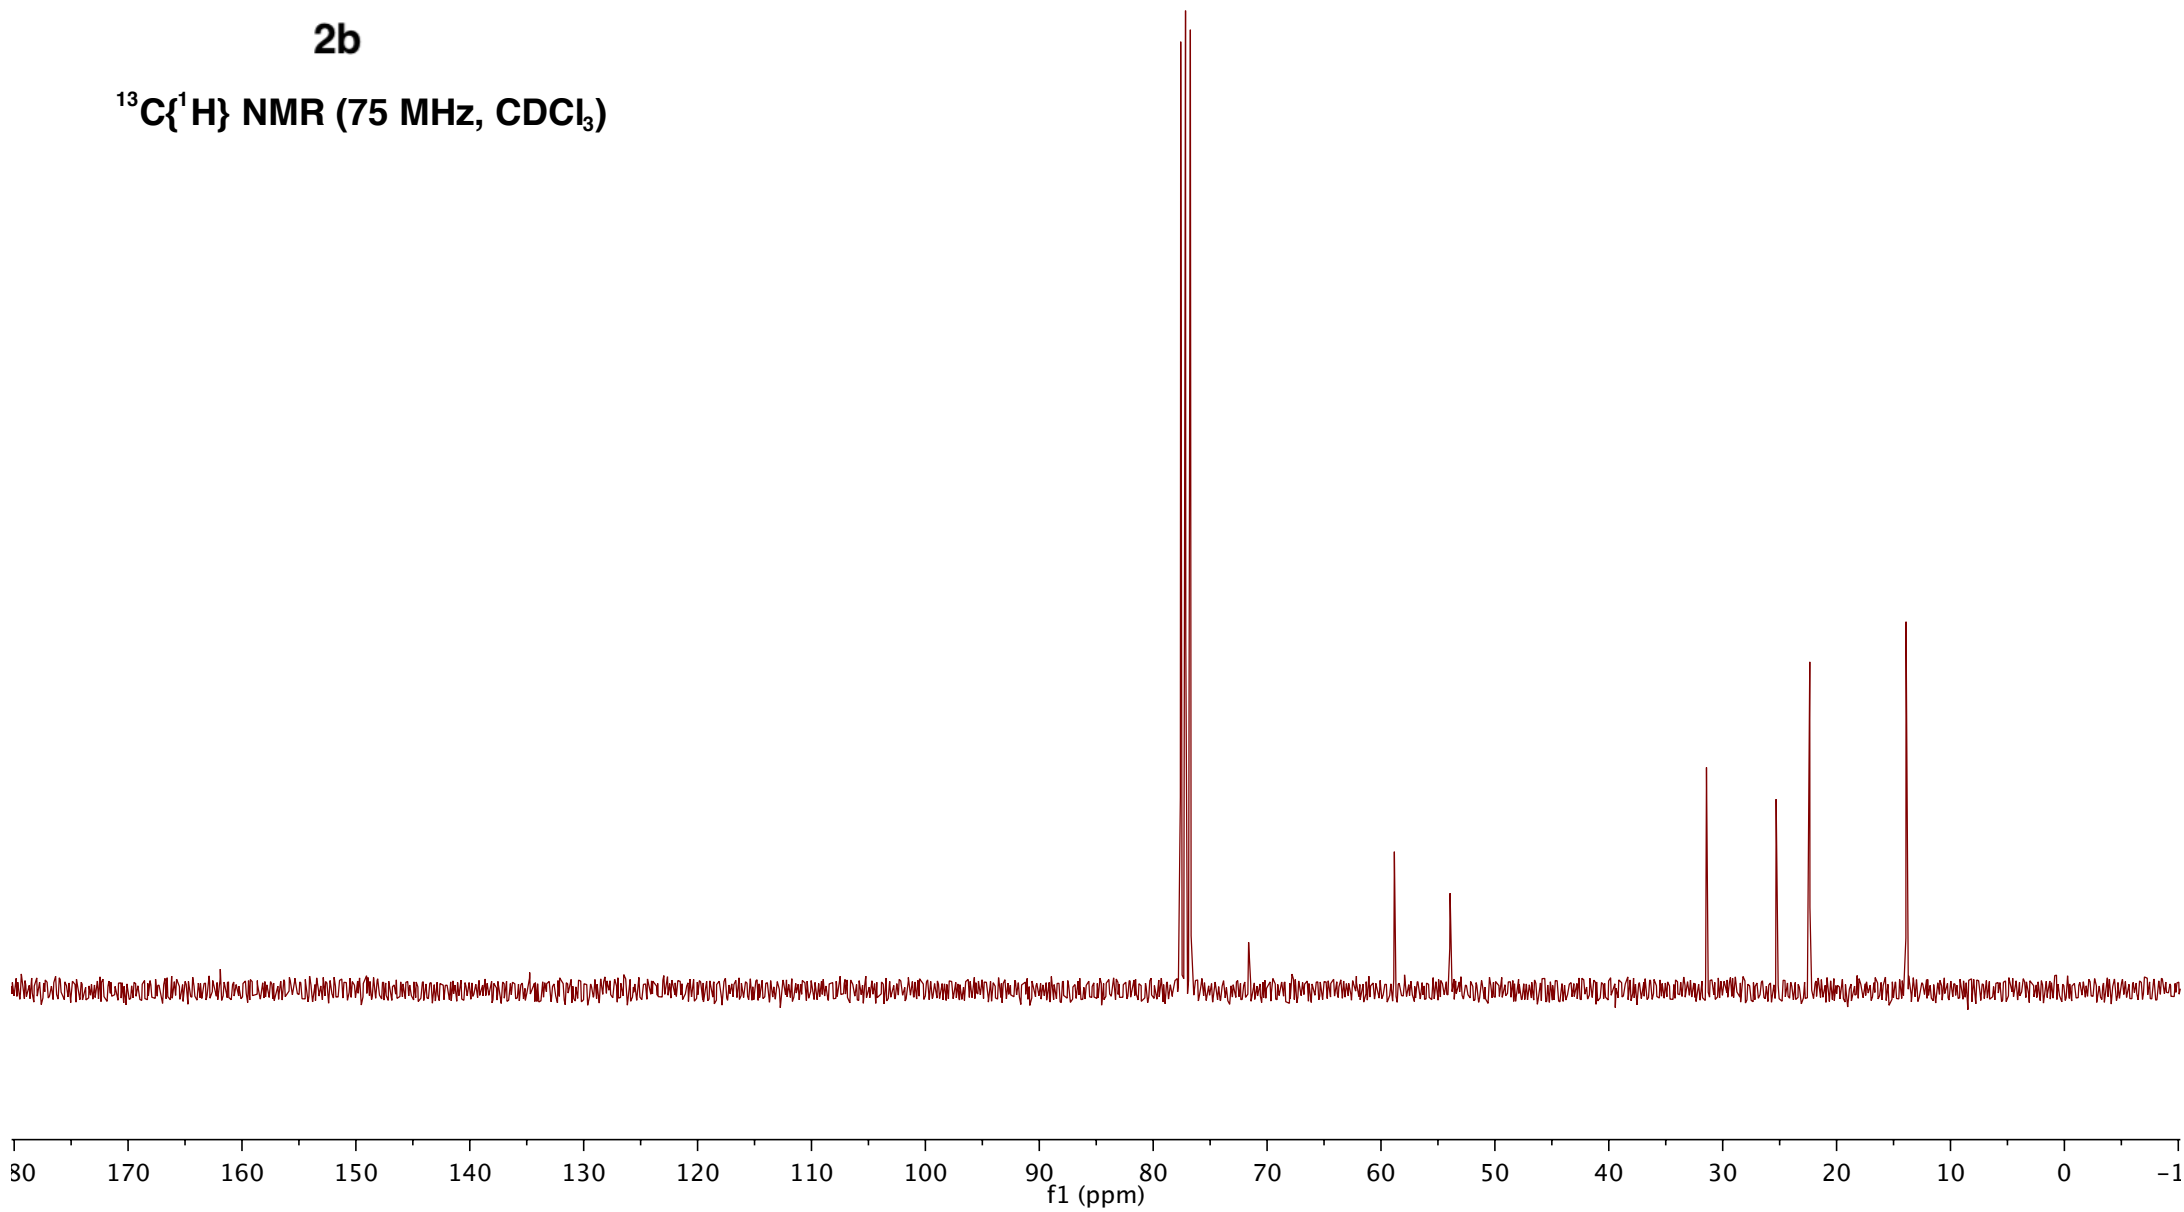

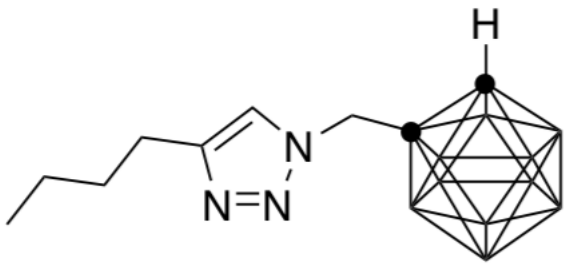

**2b**

**$^{11}\text{B}\{^1\text{H}\}$  NMR (160 MHz,  $\text{CDCl}_3$ )**

— -1.1  
— -4.4  
— -9.4  
— -11.7  
— -12.4

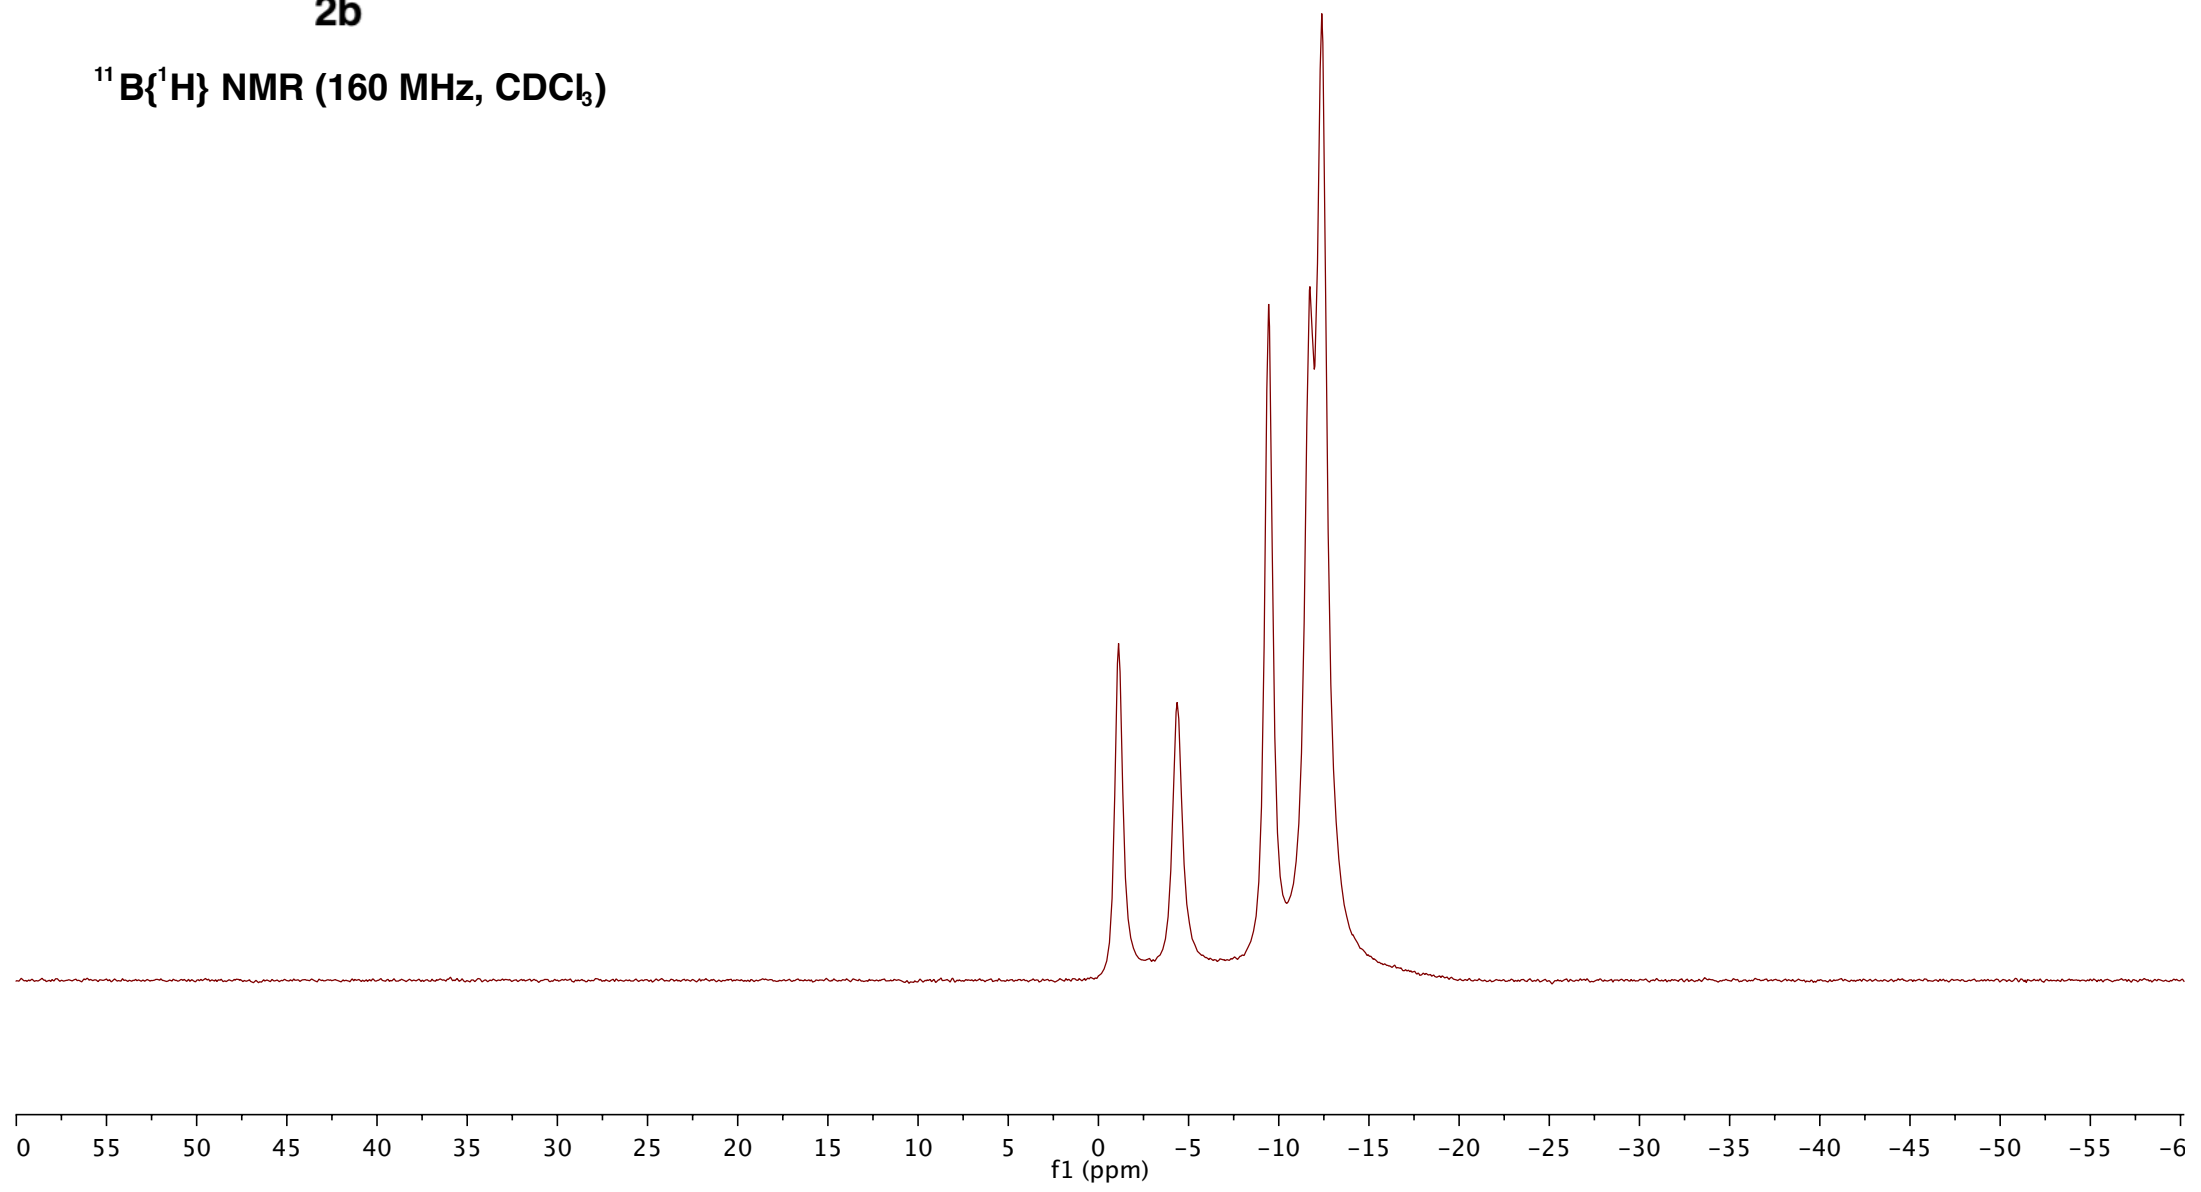

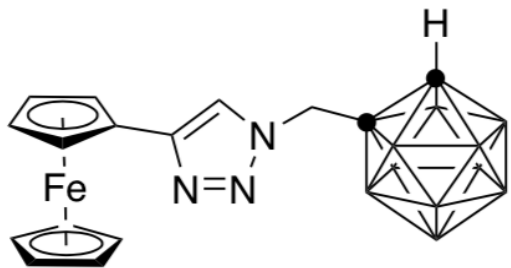

**2c**

<sup>1</sup>H NMR (300 MHz, CDCl<sub>3</sub>)

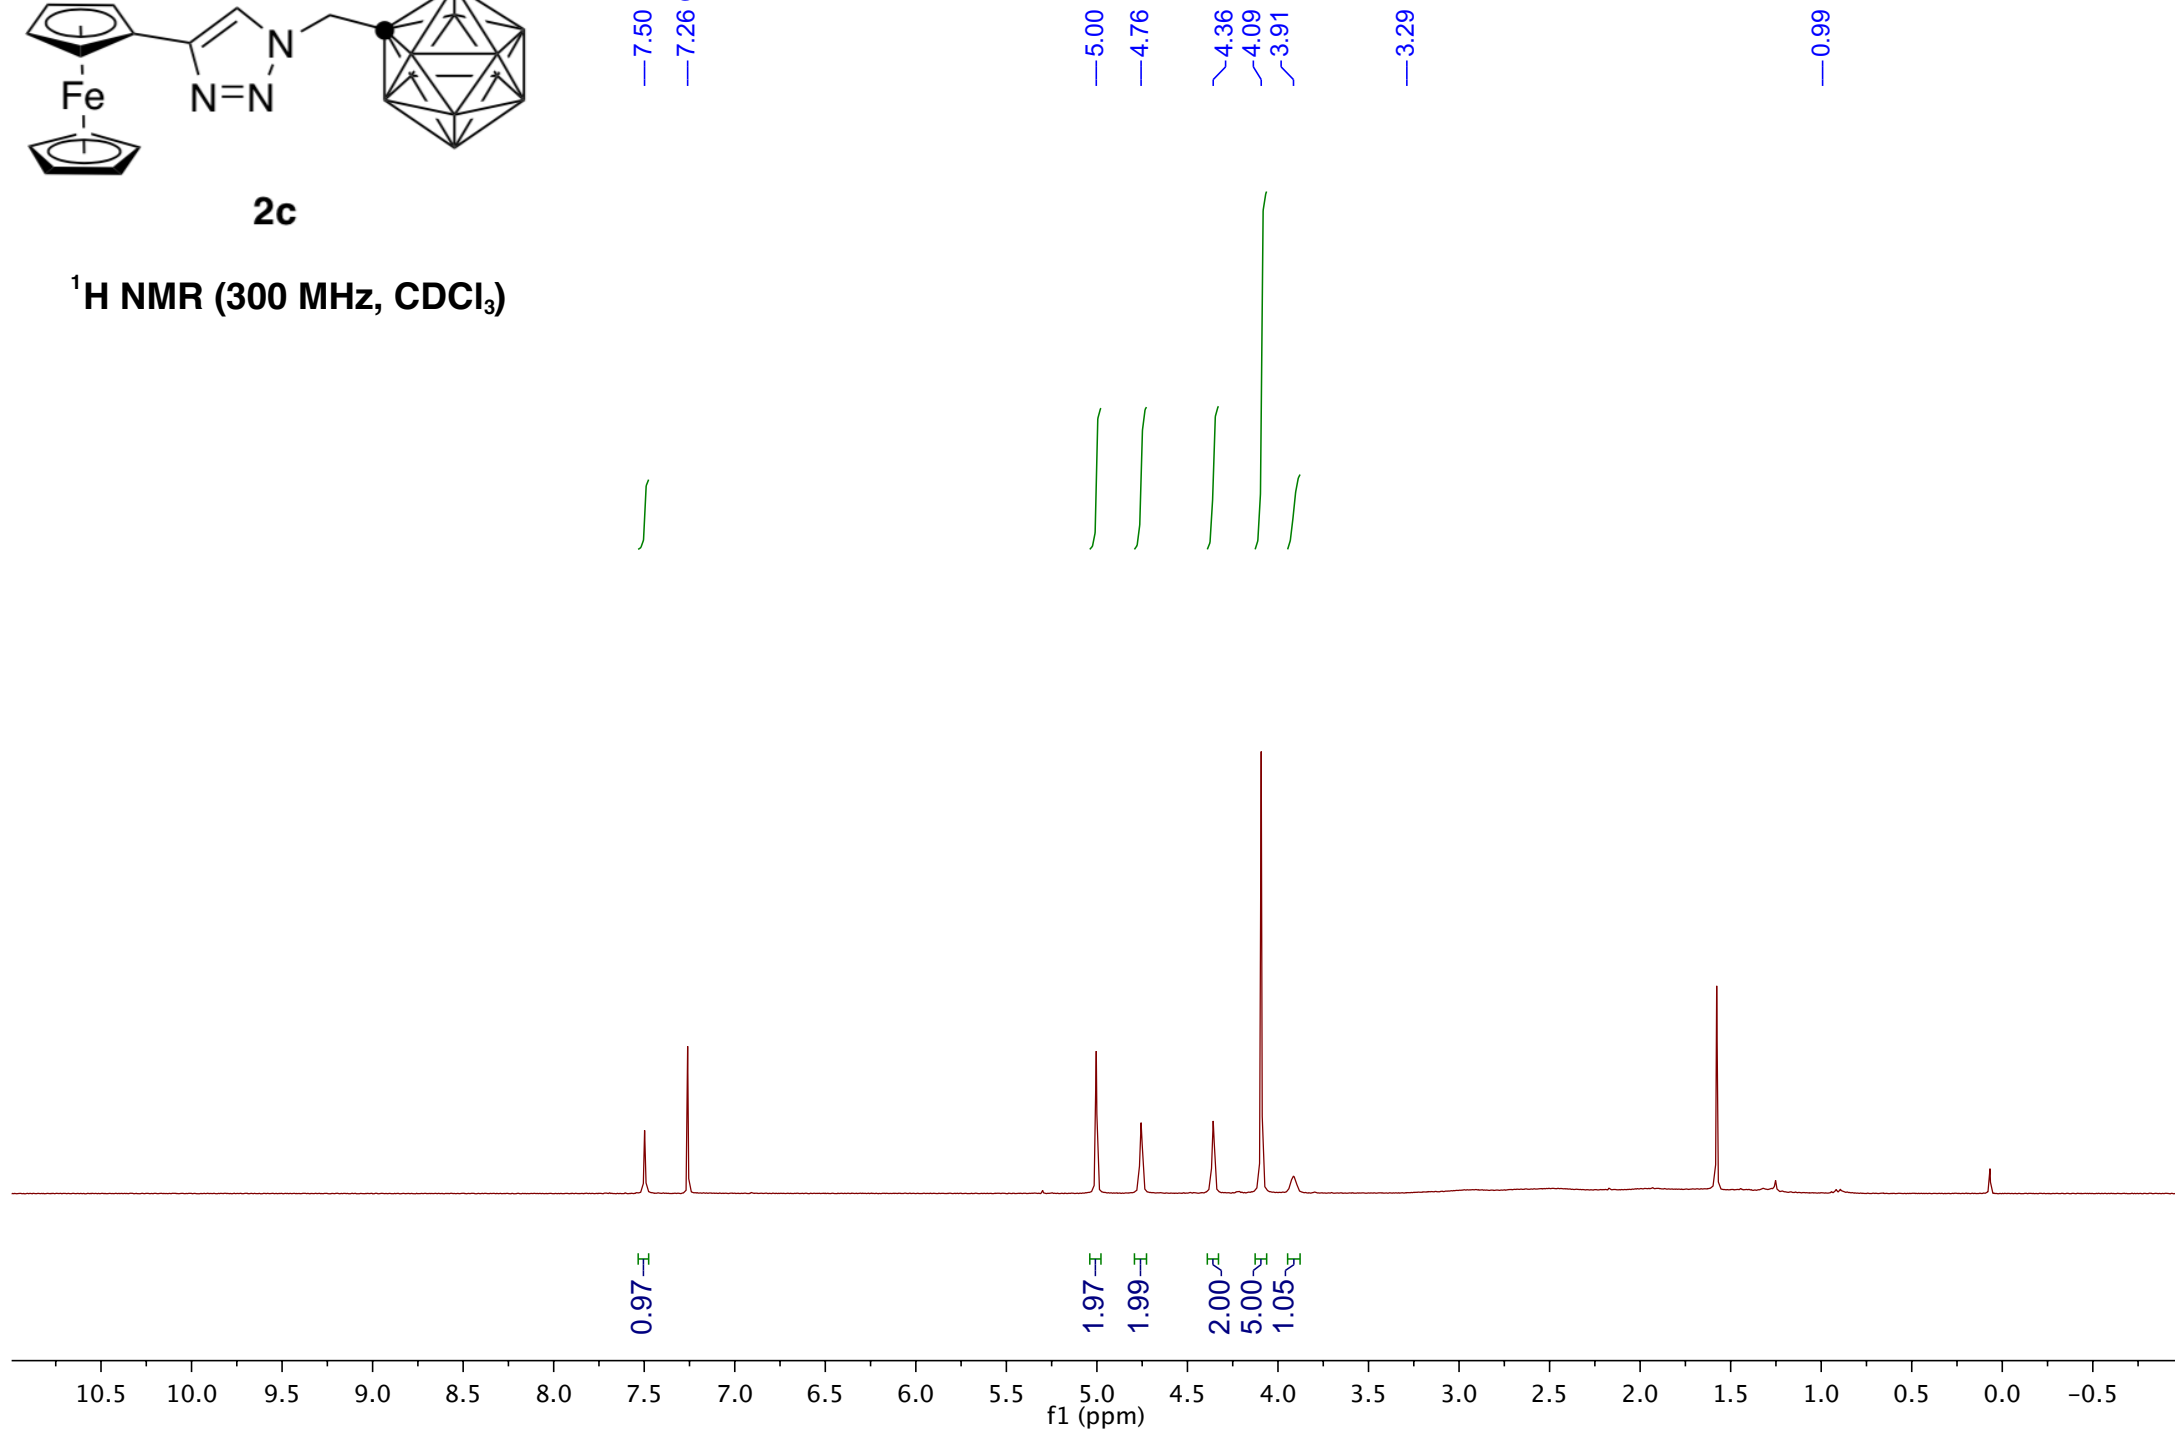

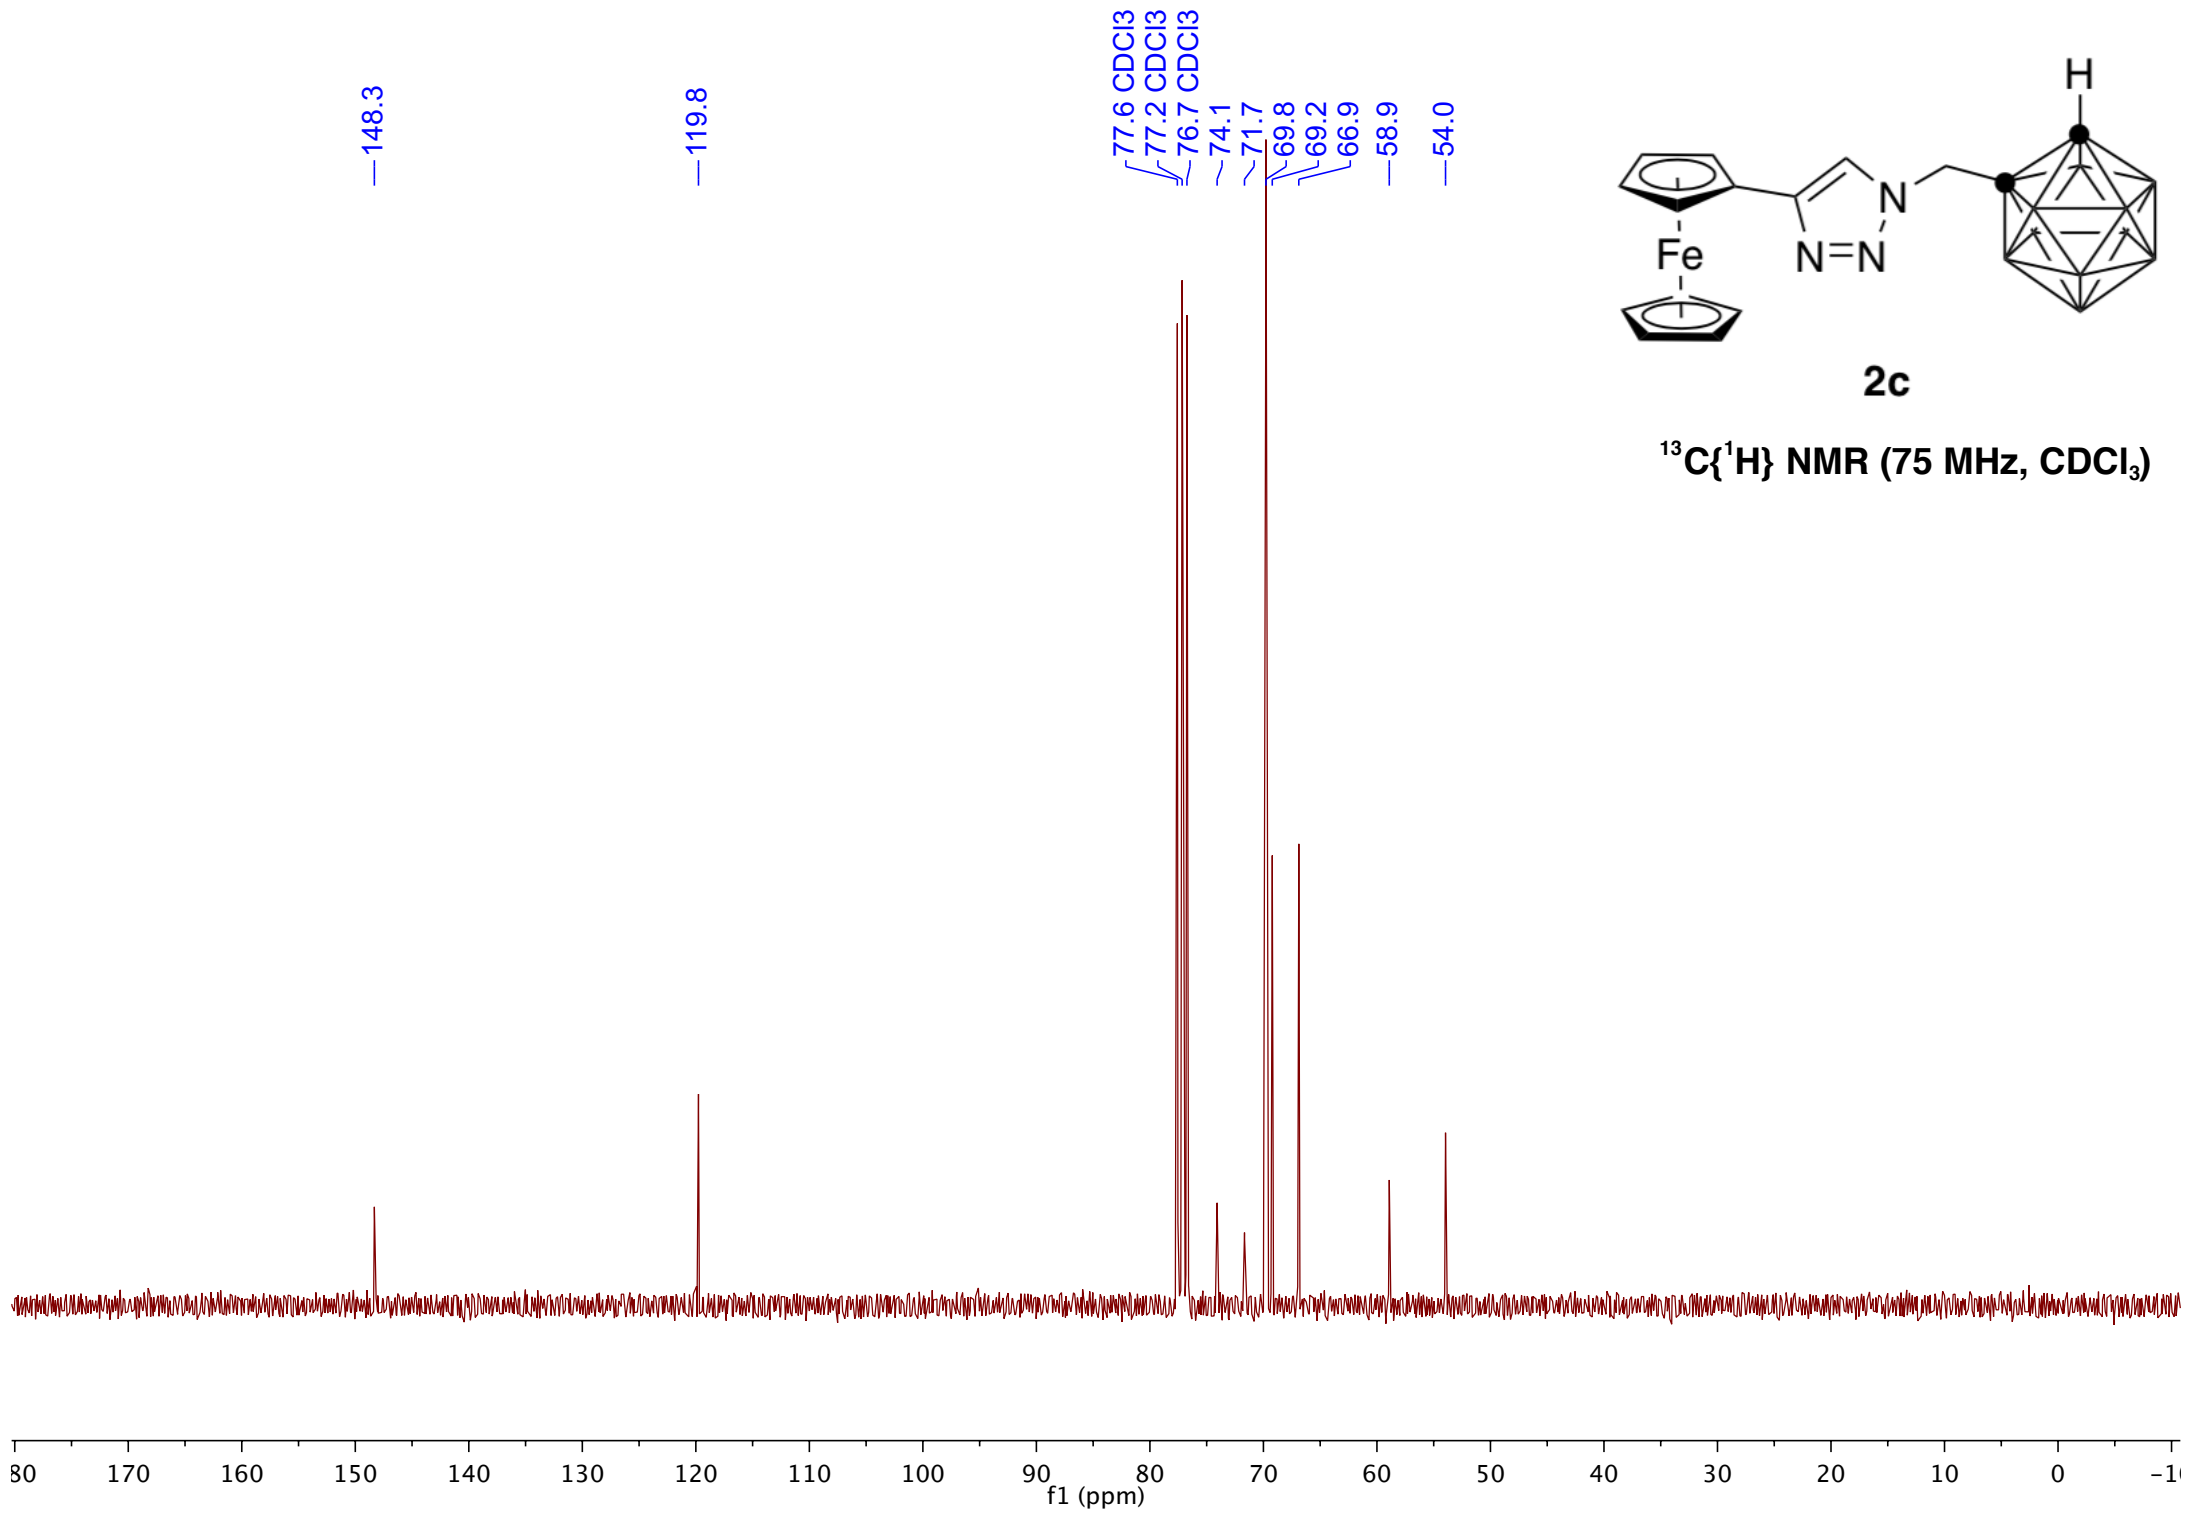

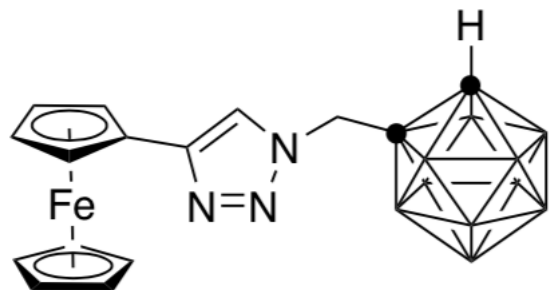

**2c**

$^{11}\text{B}\{^1\text{H}\}$ NMR (160 MHz,  $\text{CDCl}_3$ )

-0.6  
-1.5  
-3.9  
-4.8  
-9.0  
-9.9  
-12.1  
-12.9

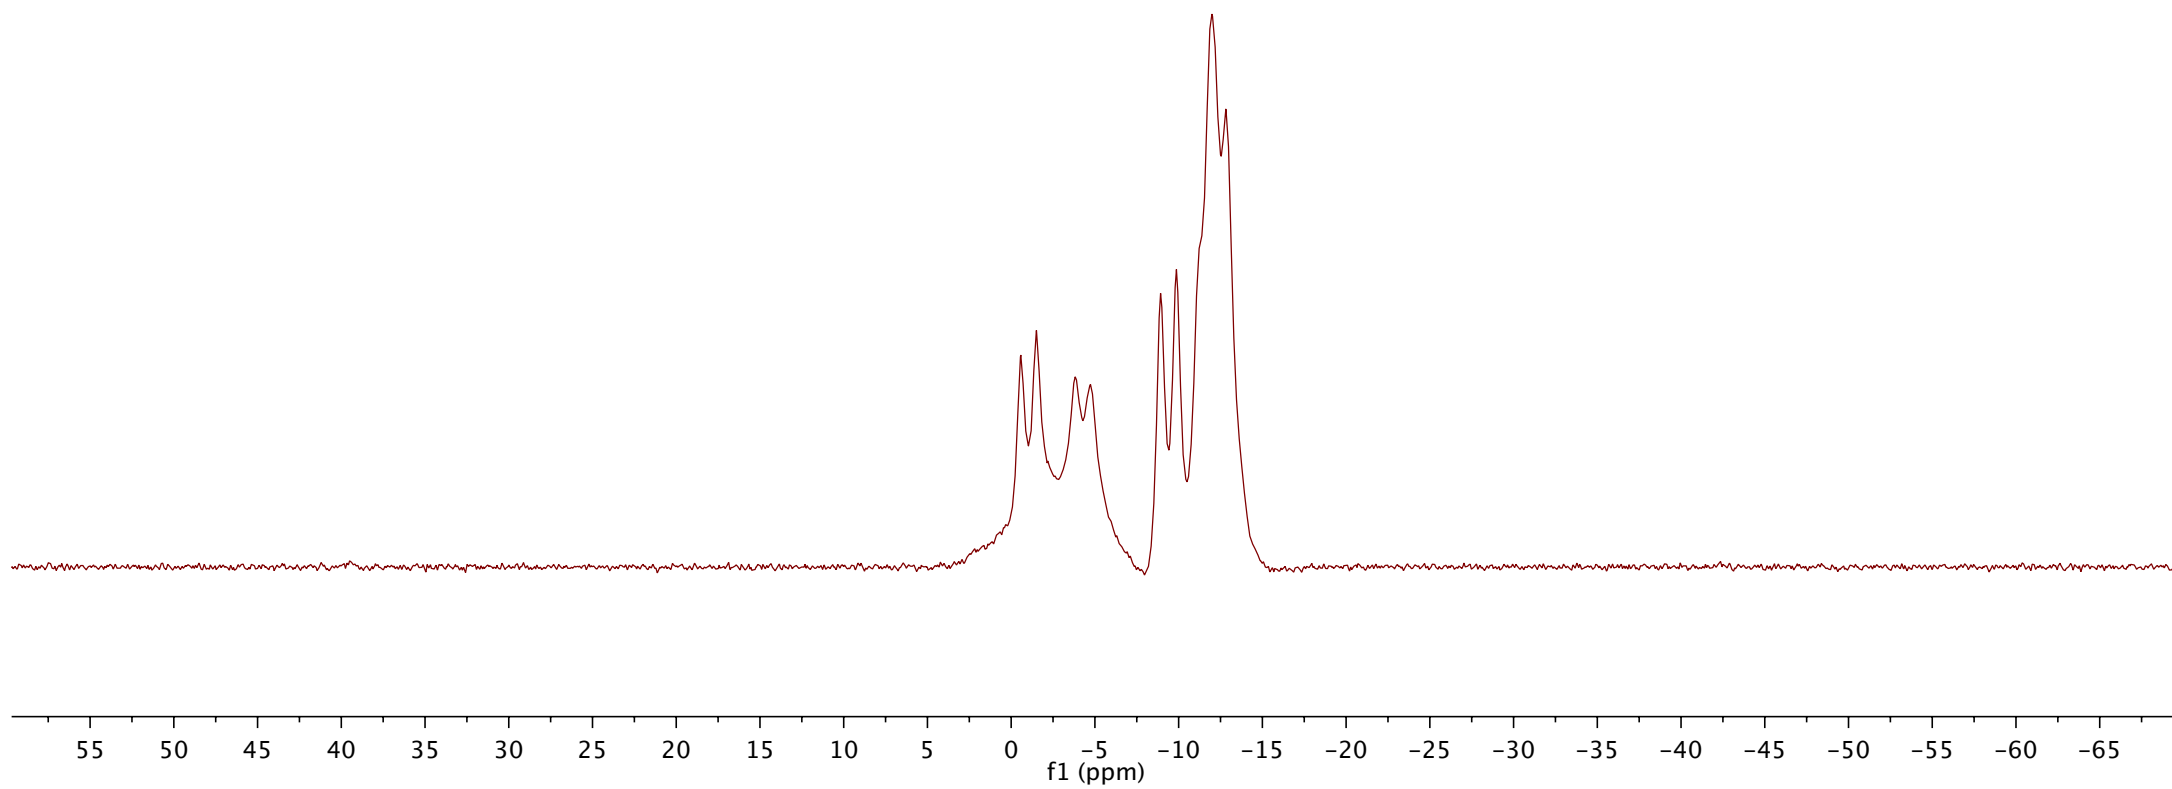



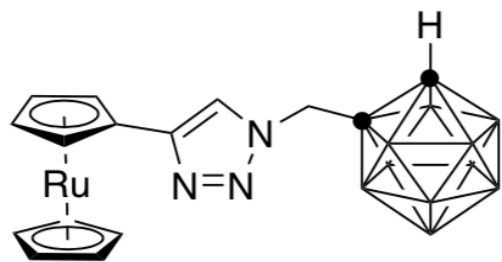

**2d**

**$^1\text{H}$  NMR (300 MHz,  $\text{CDCl}_3$ )**

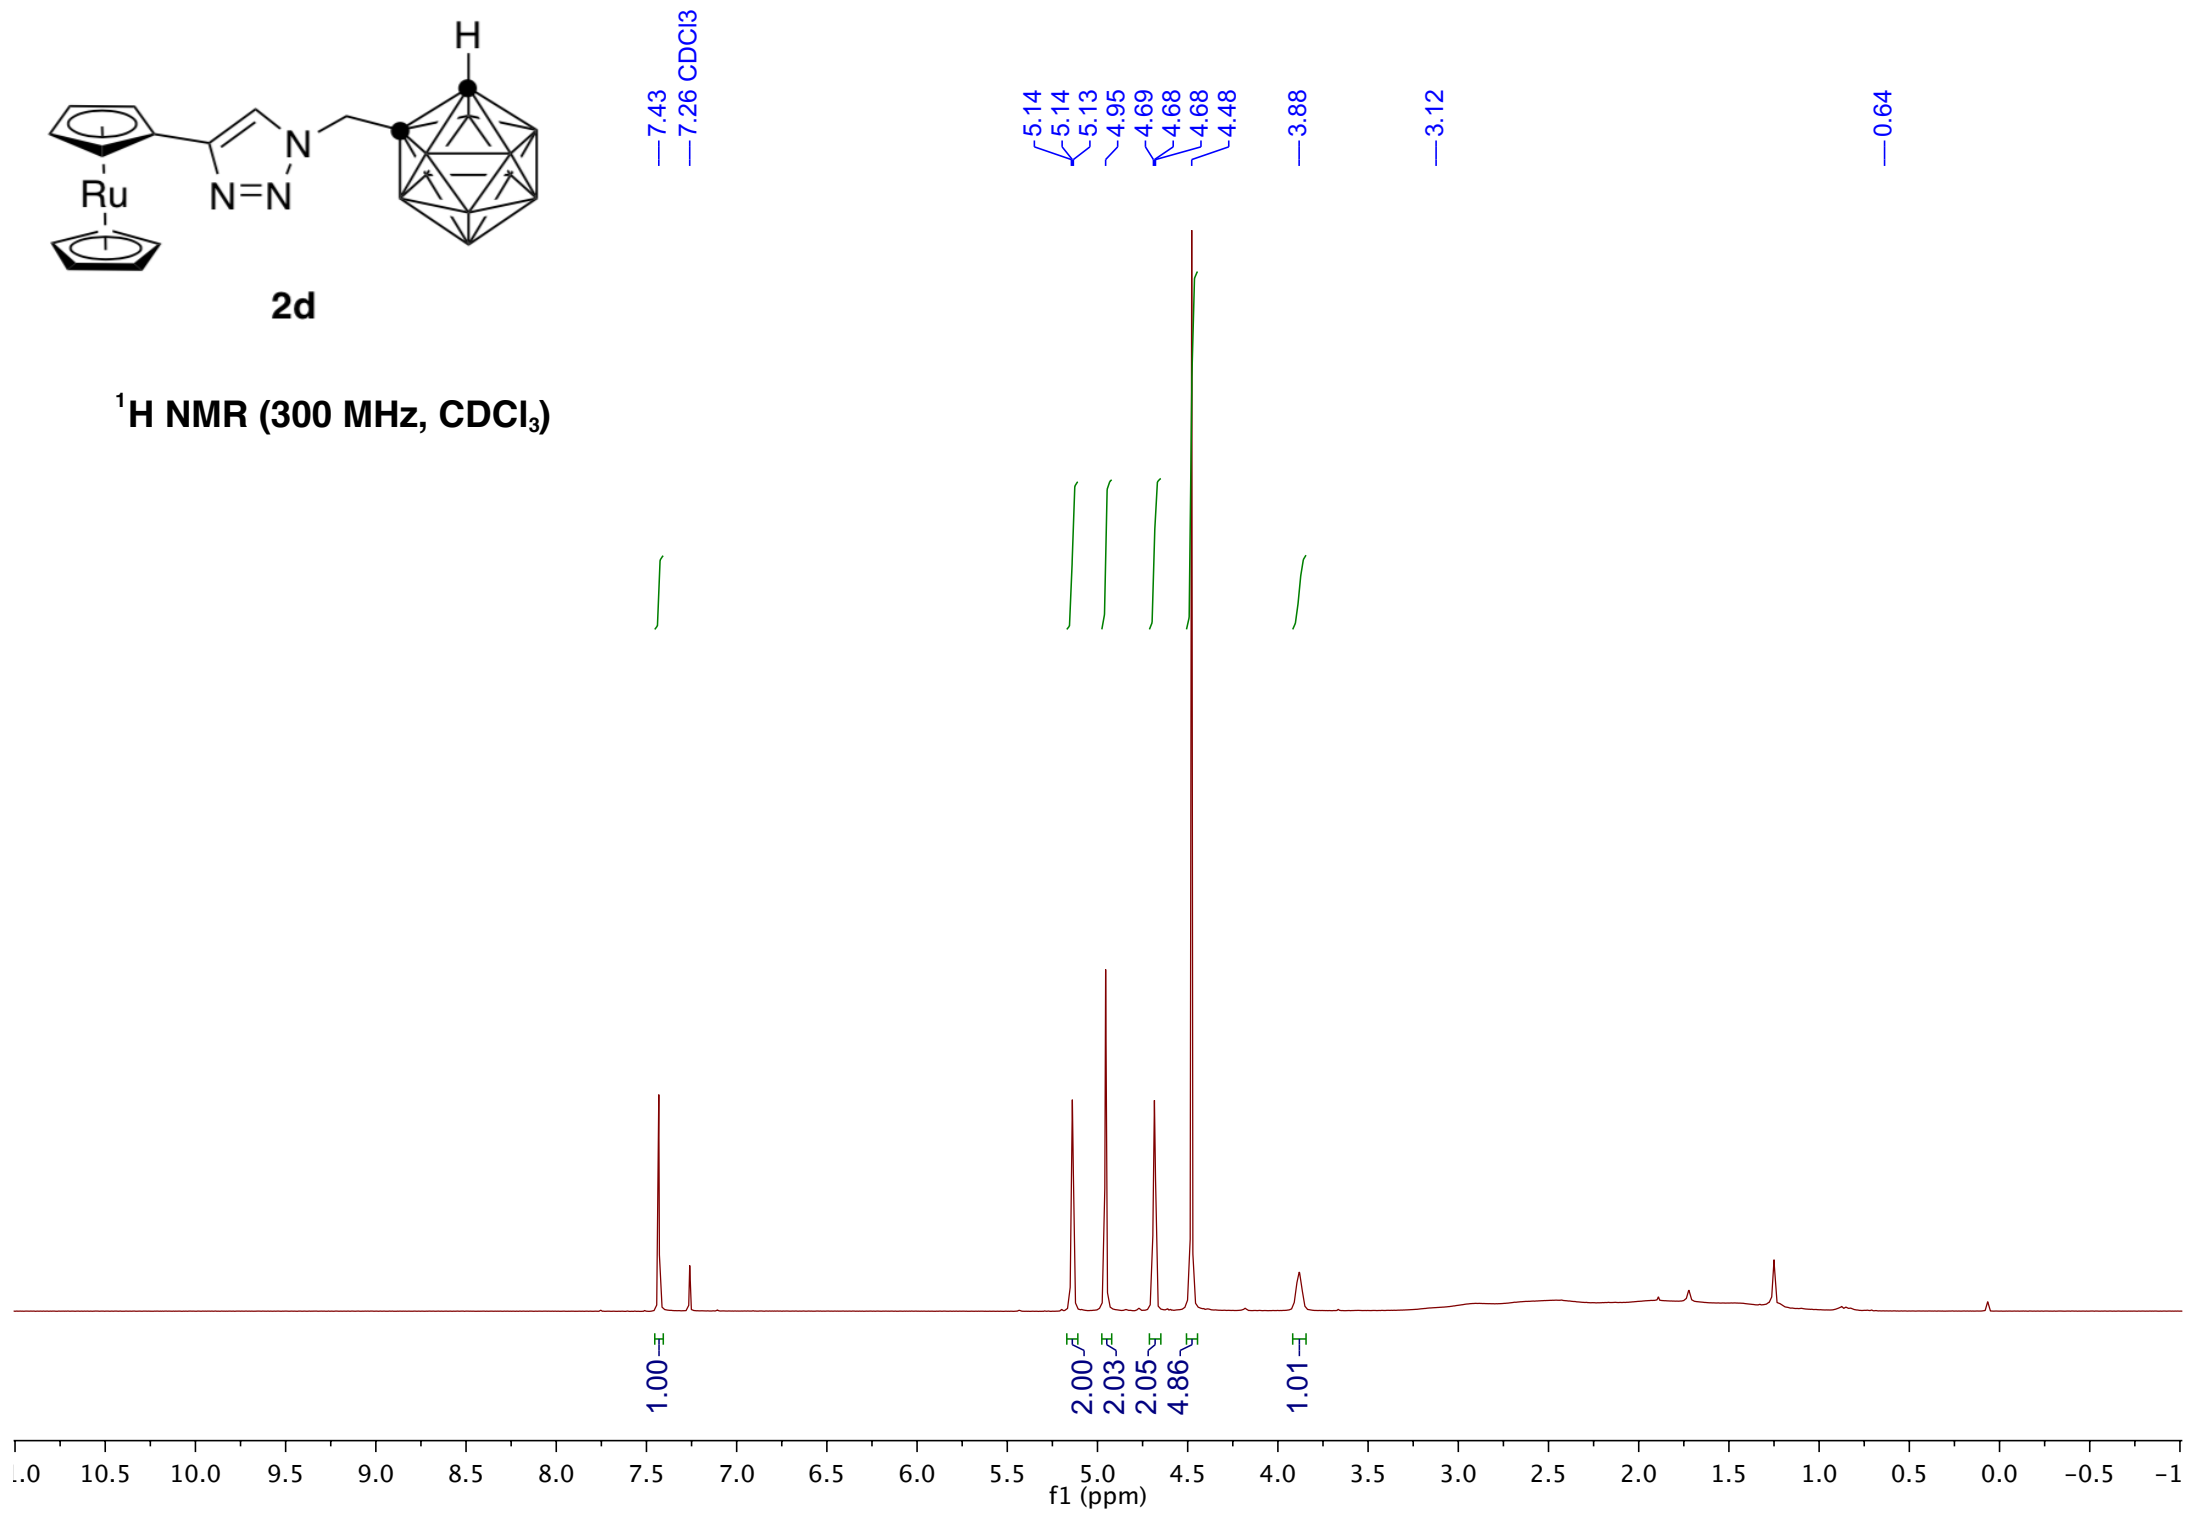

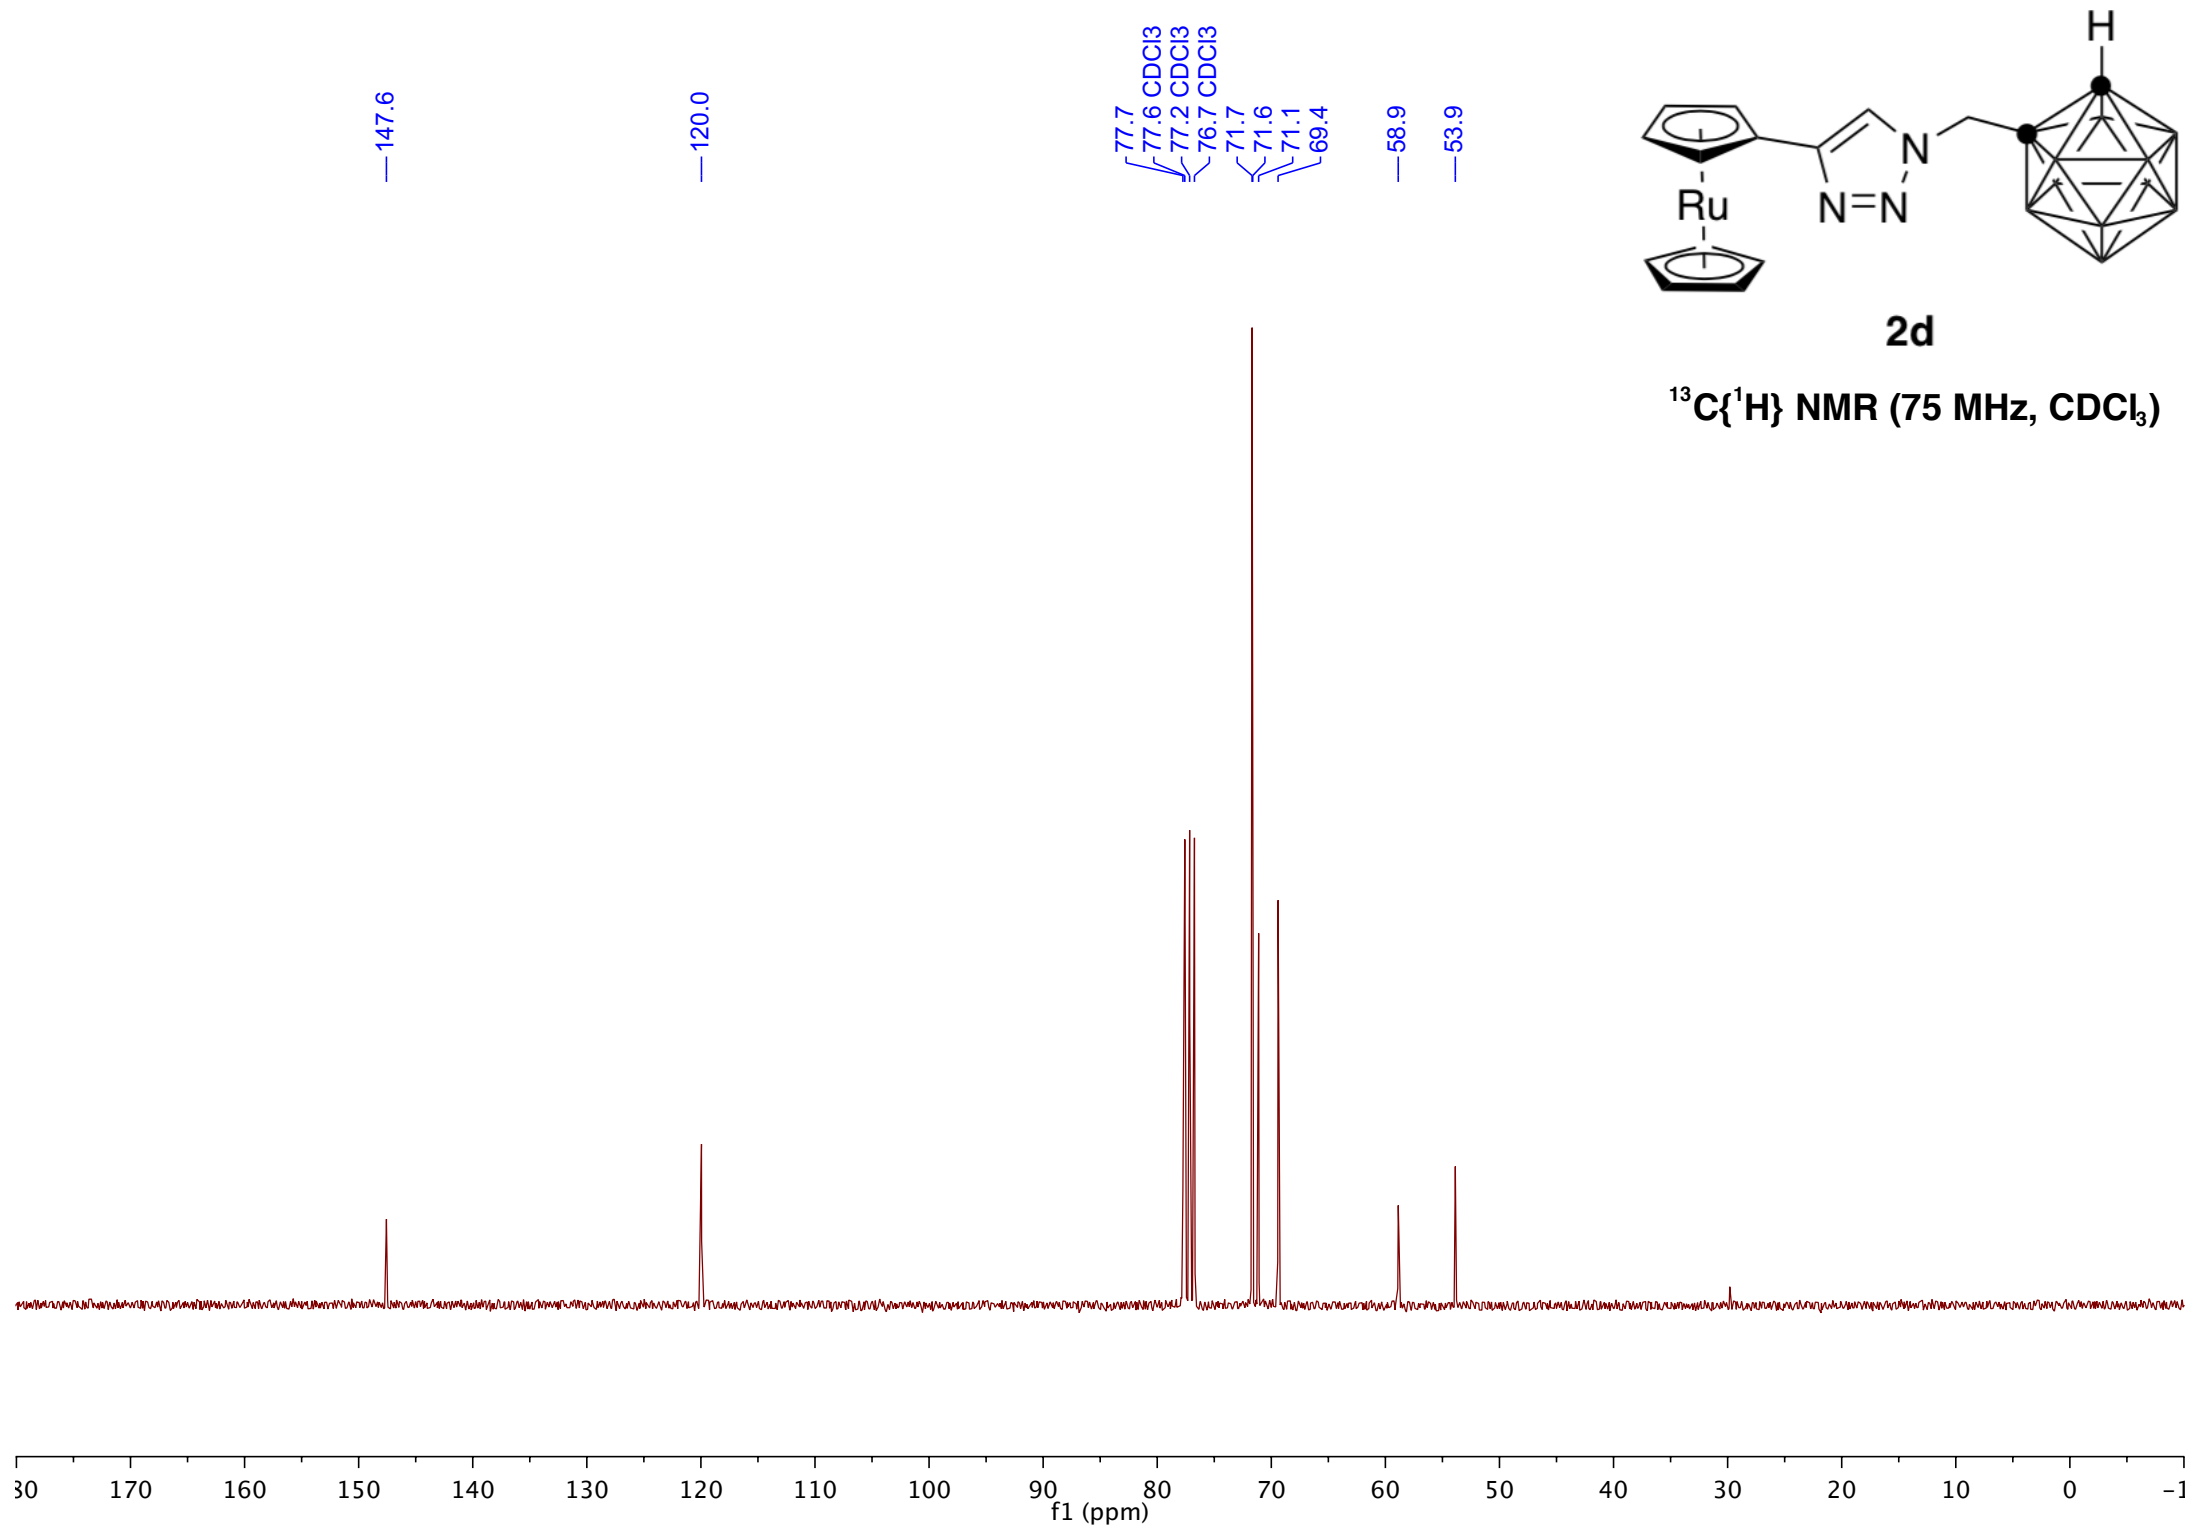

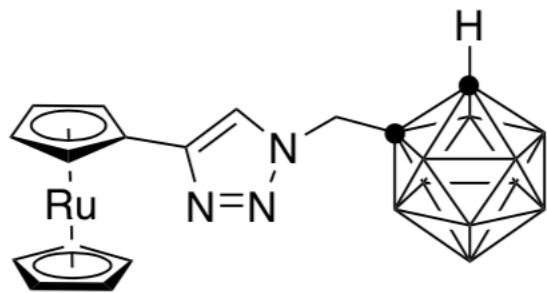

**2d**

**$^{11}\text{B}\{^1\text{H}\}$ NMR (160 MHz,  $\text{CDCl}_3$ )**

---1.1  
---4.3  
---9.4  
---12.4

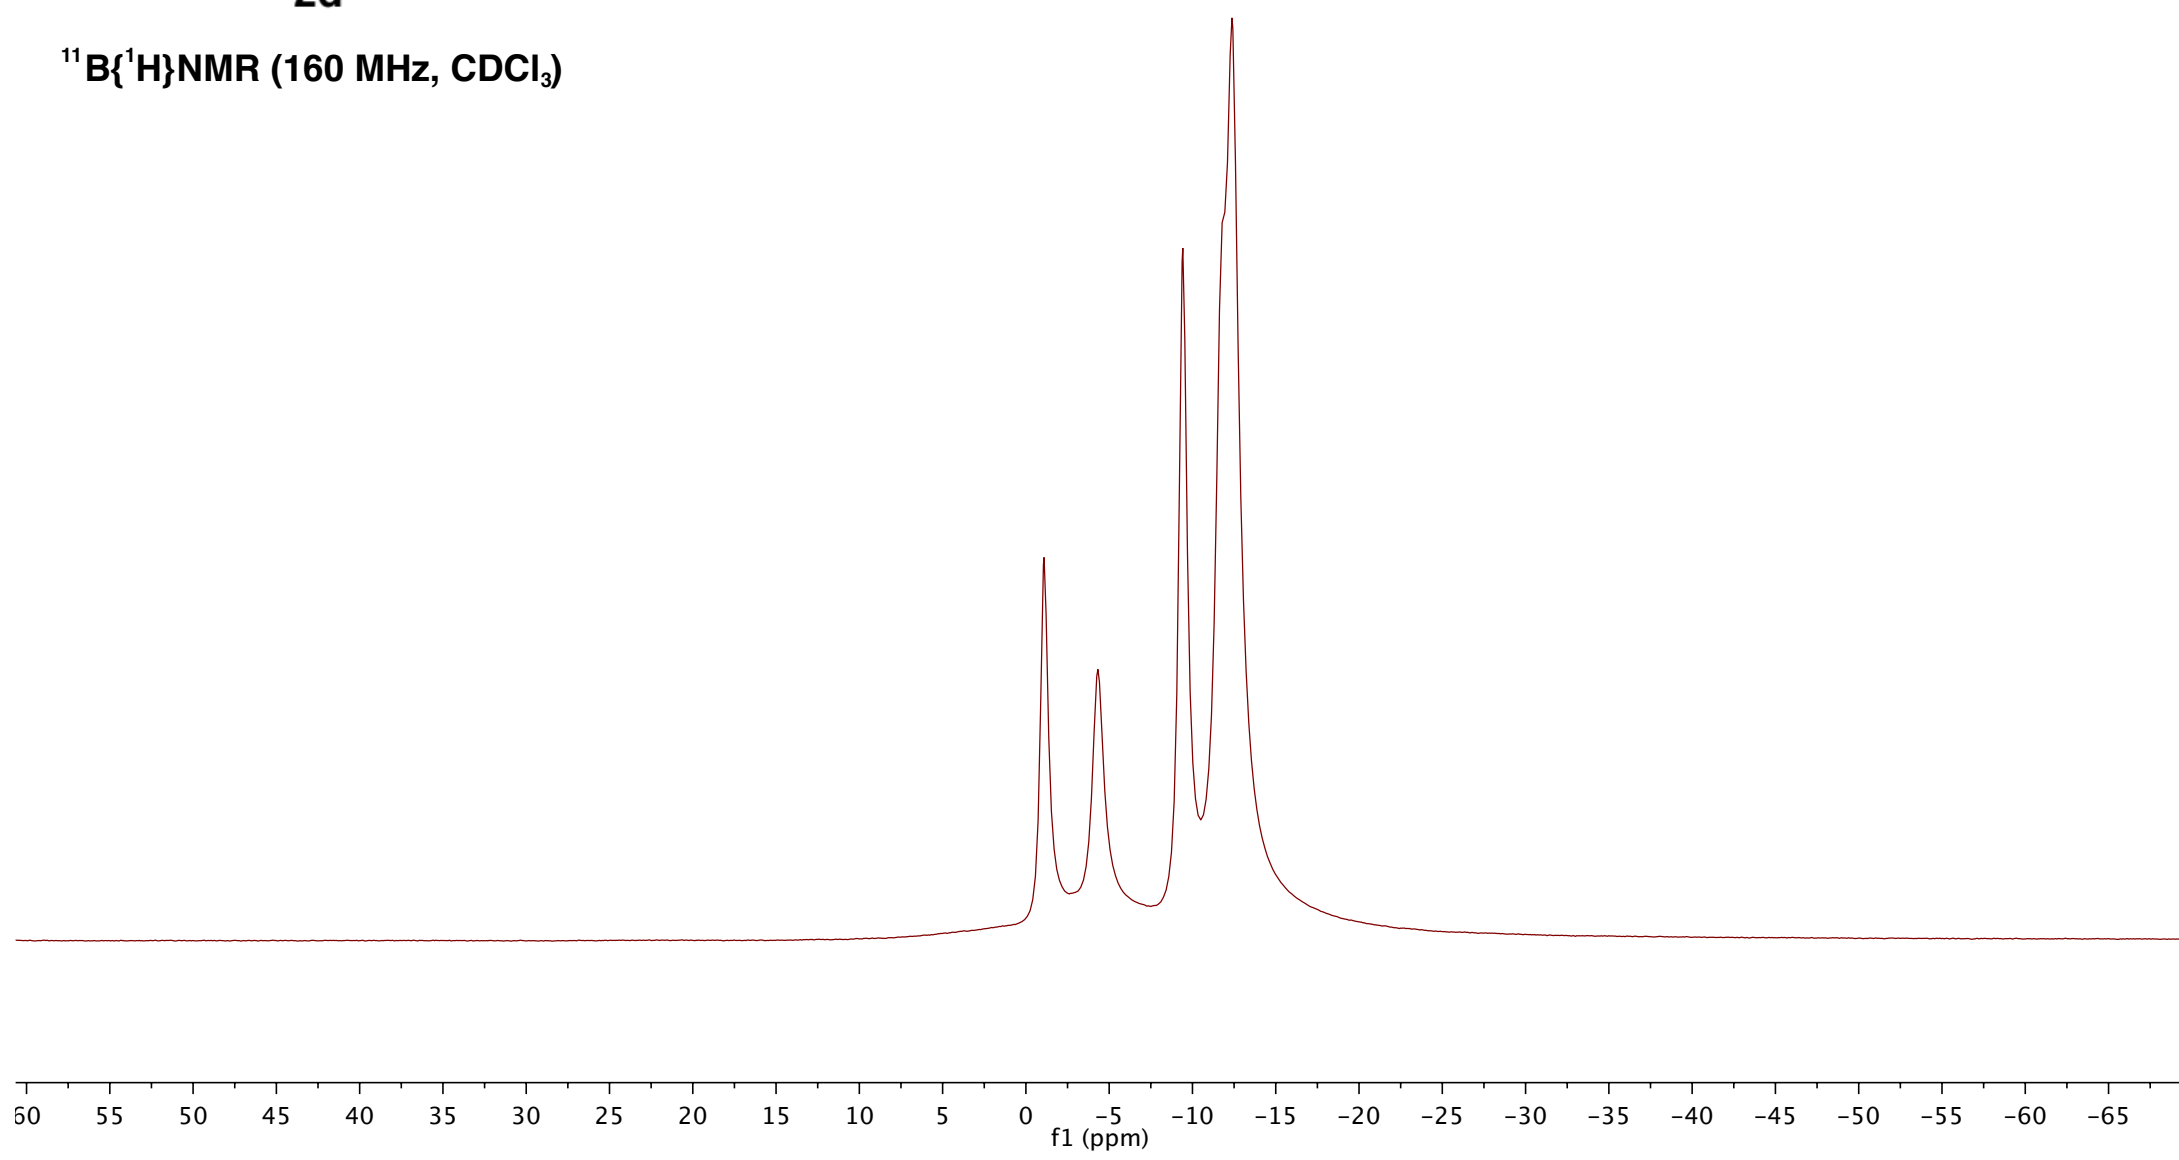

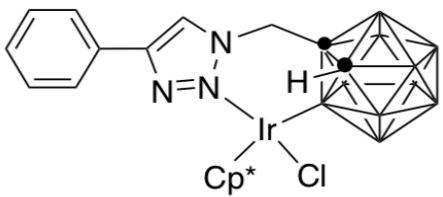

3a

<sup>1</sup>H NMR (300 MHz, CDCl<sub>3</sub>)

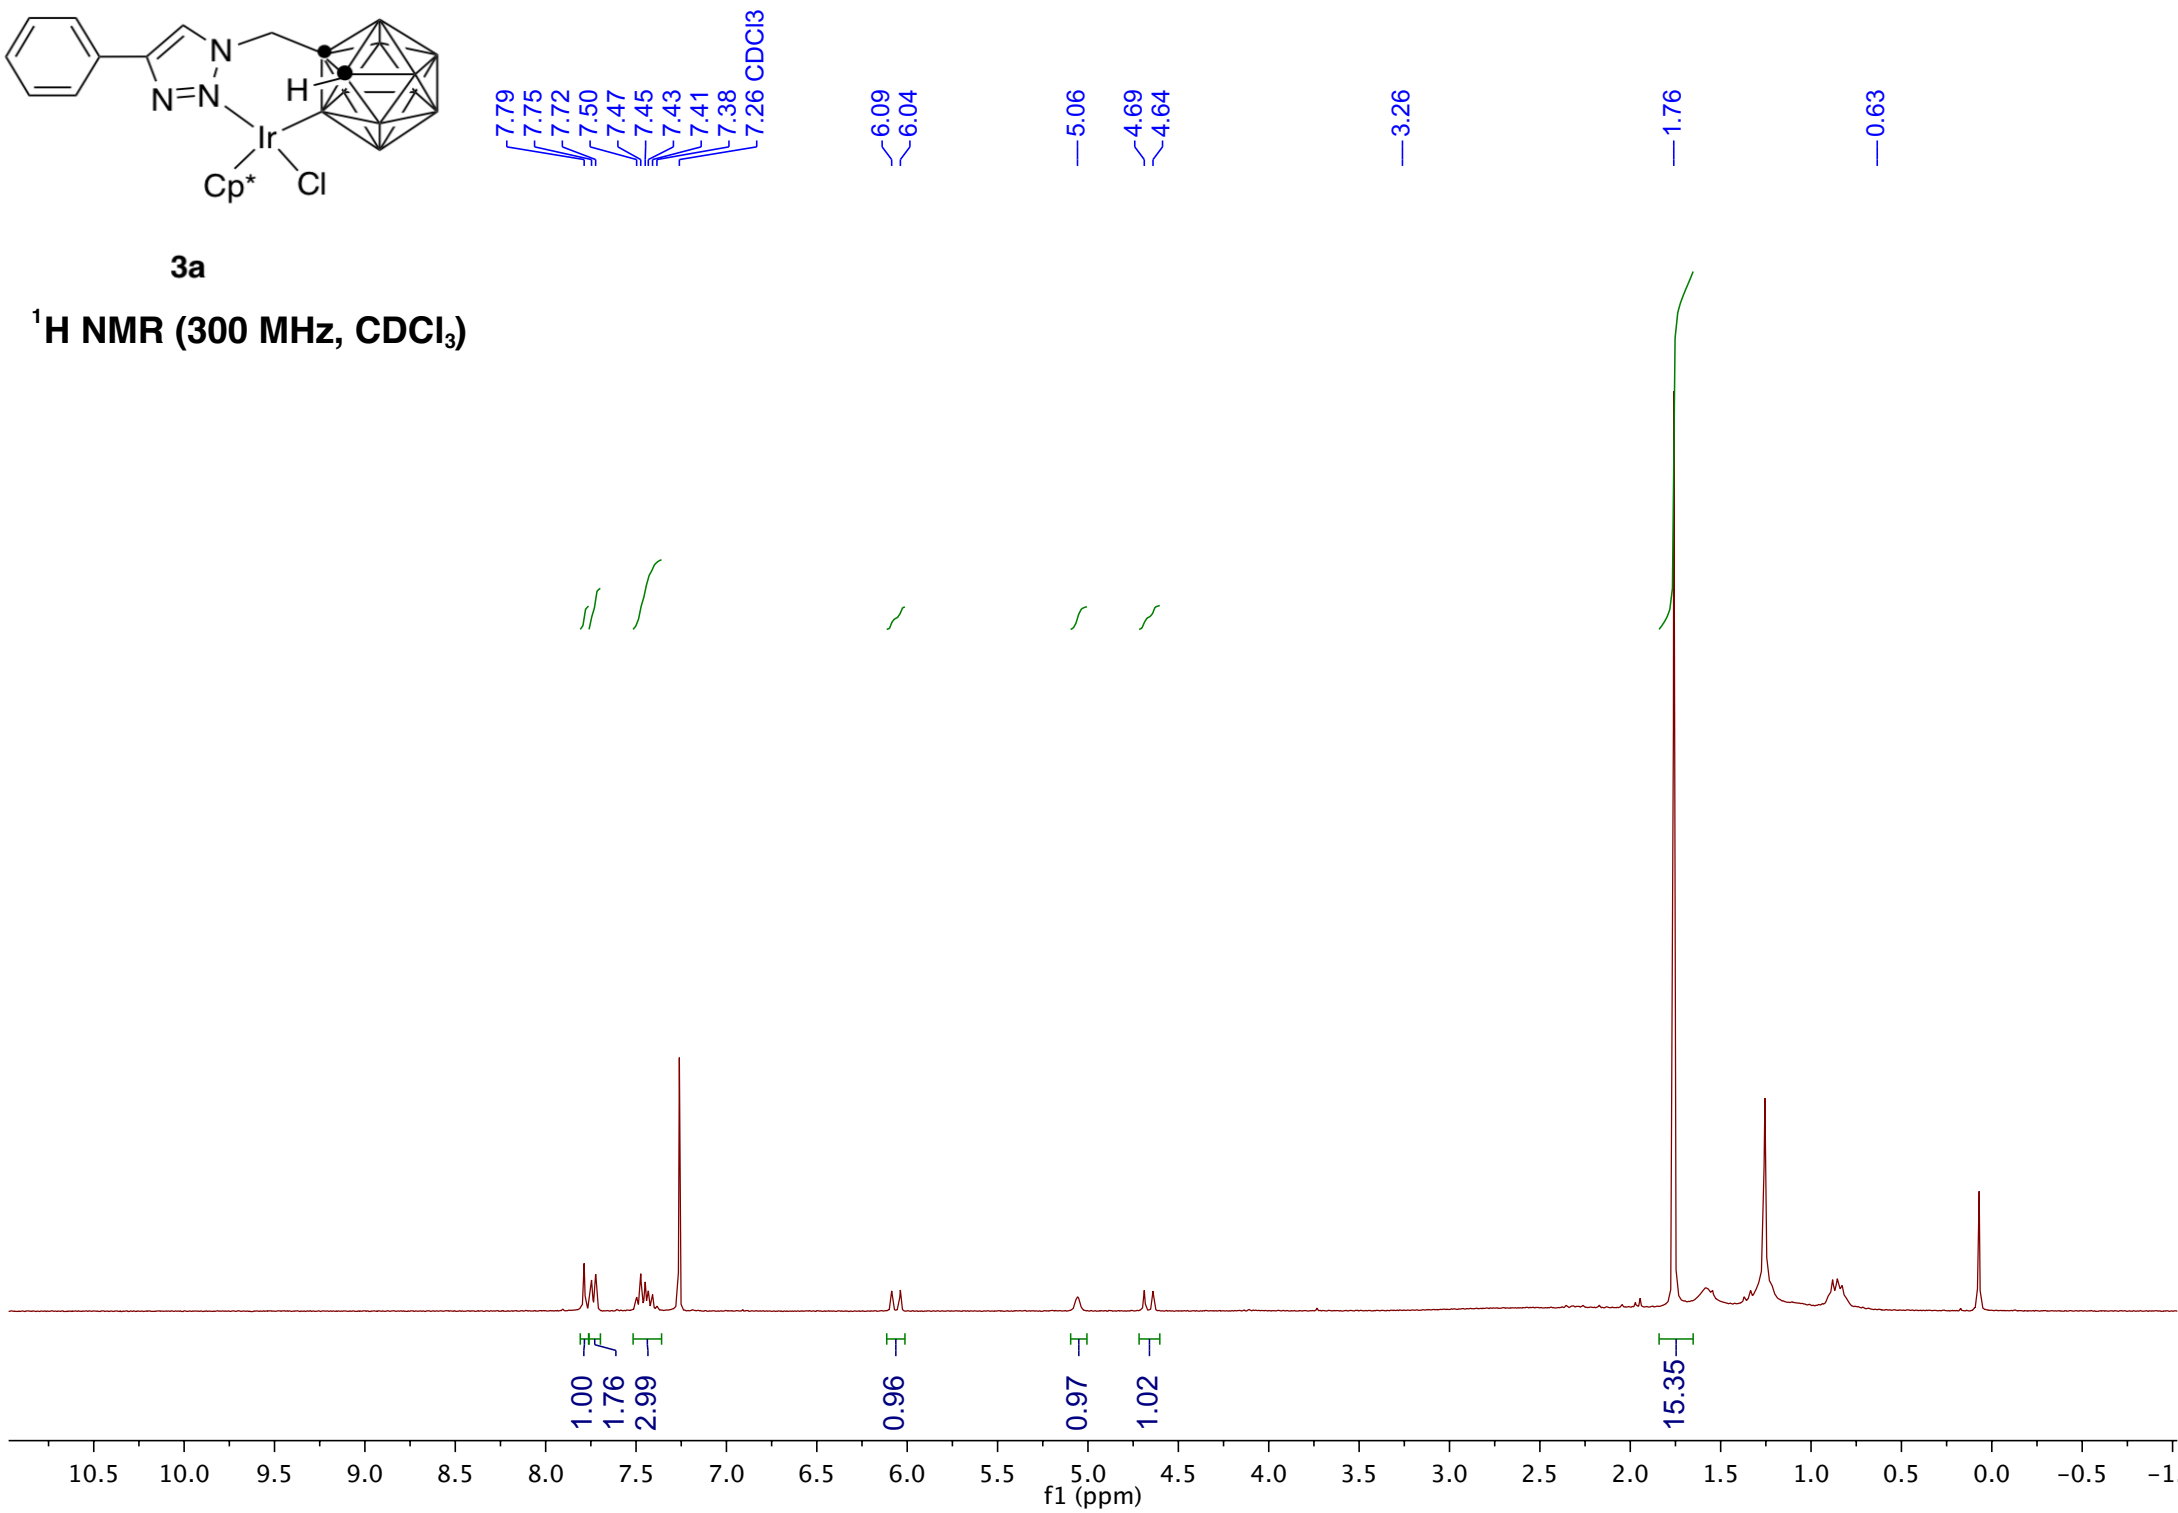

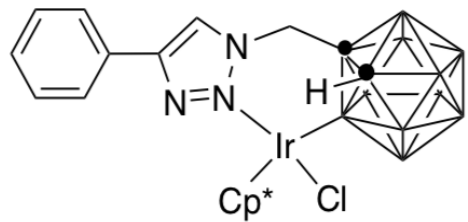

**3a**

$^{13}\text{C}\{^1\text{H}\}$  NMR (125 MHz,  $d_6$ -acetone)

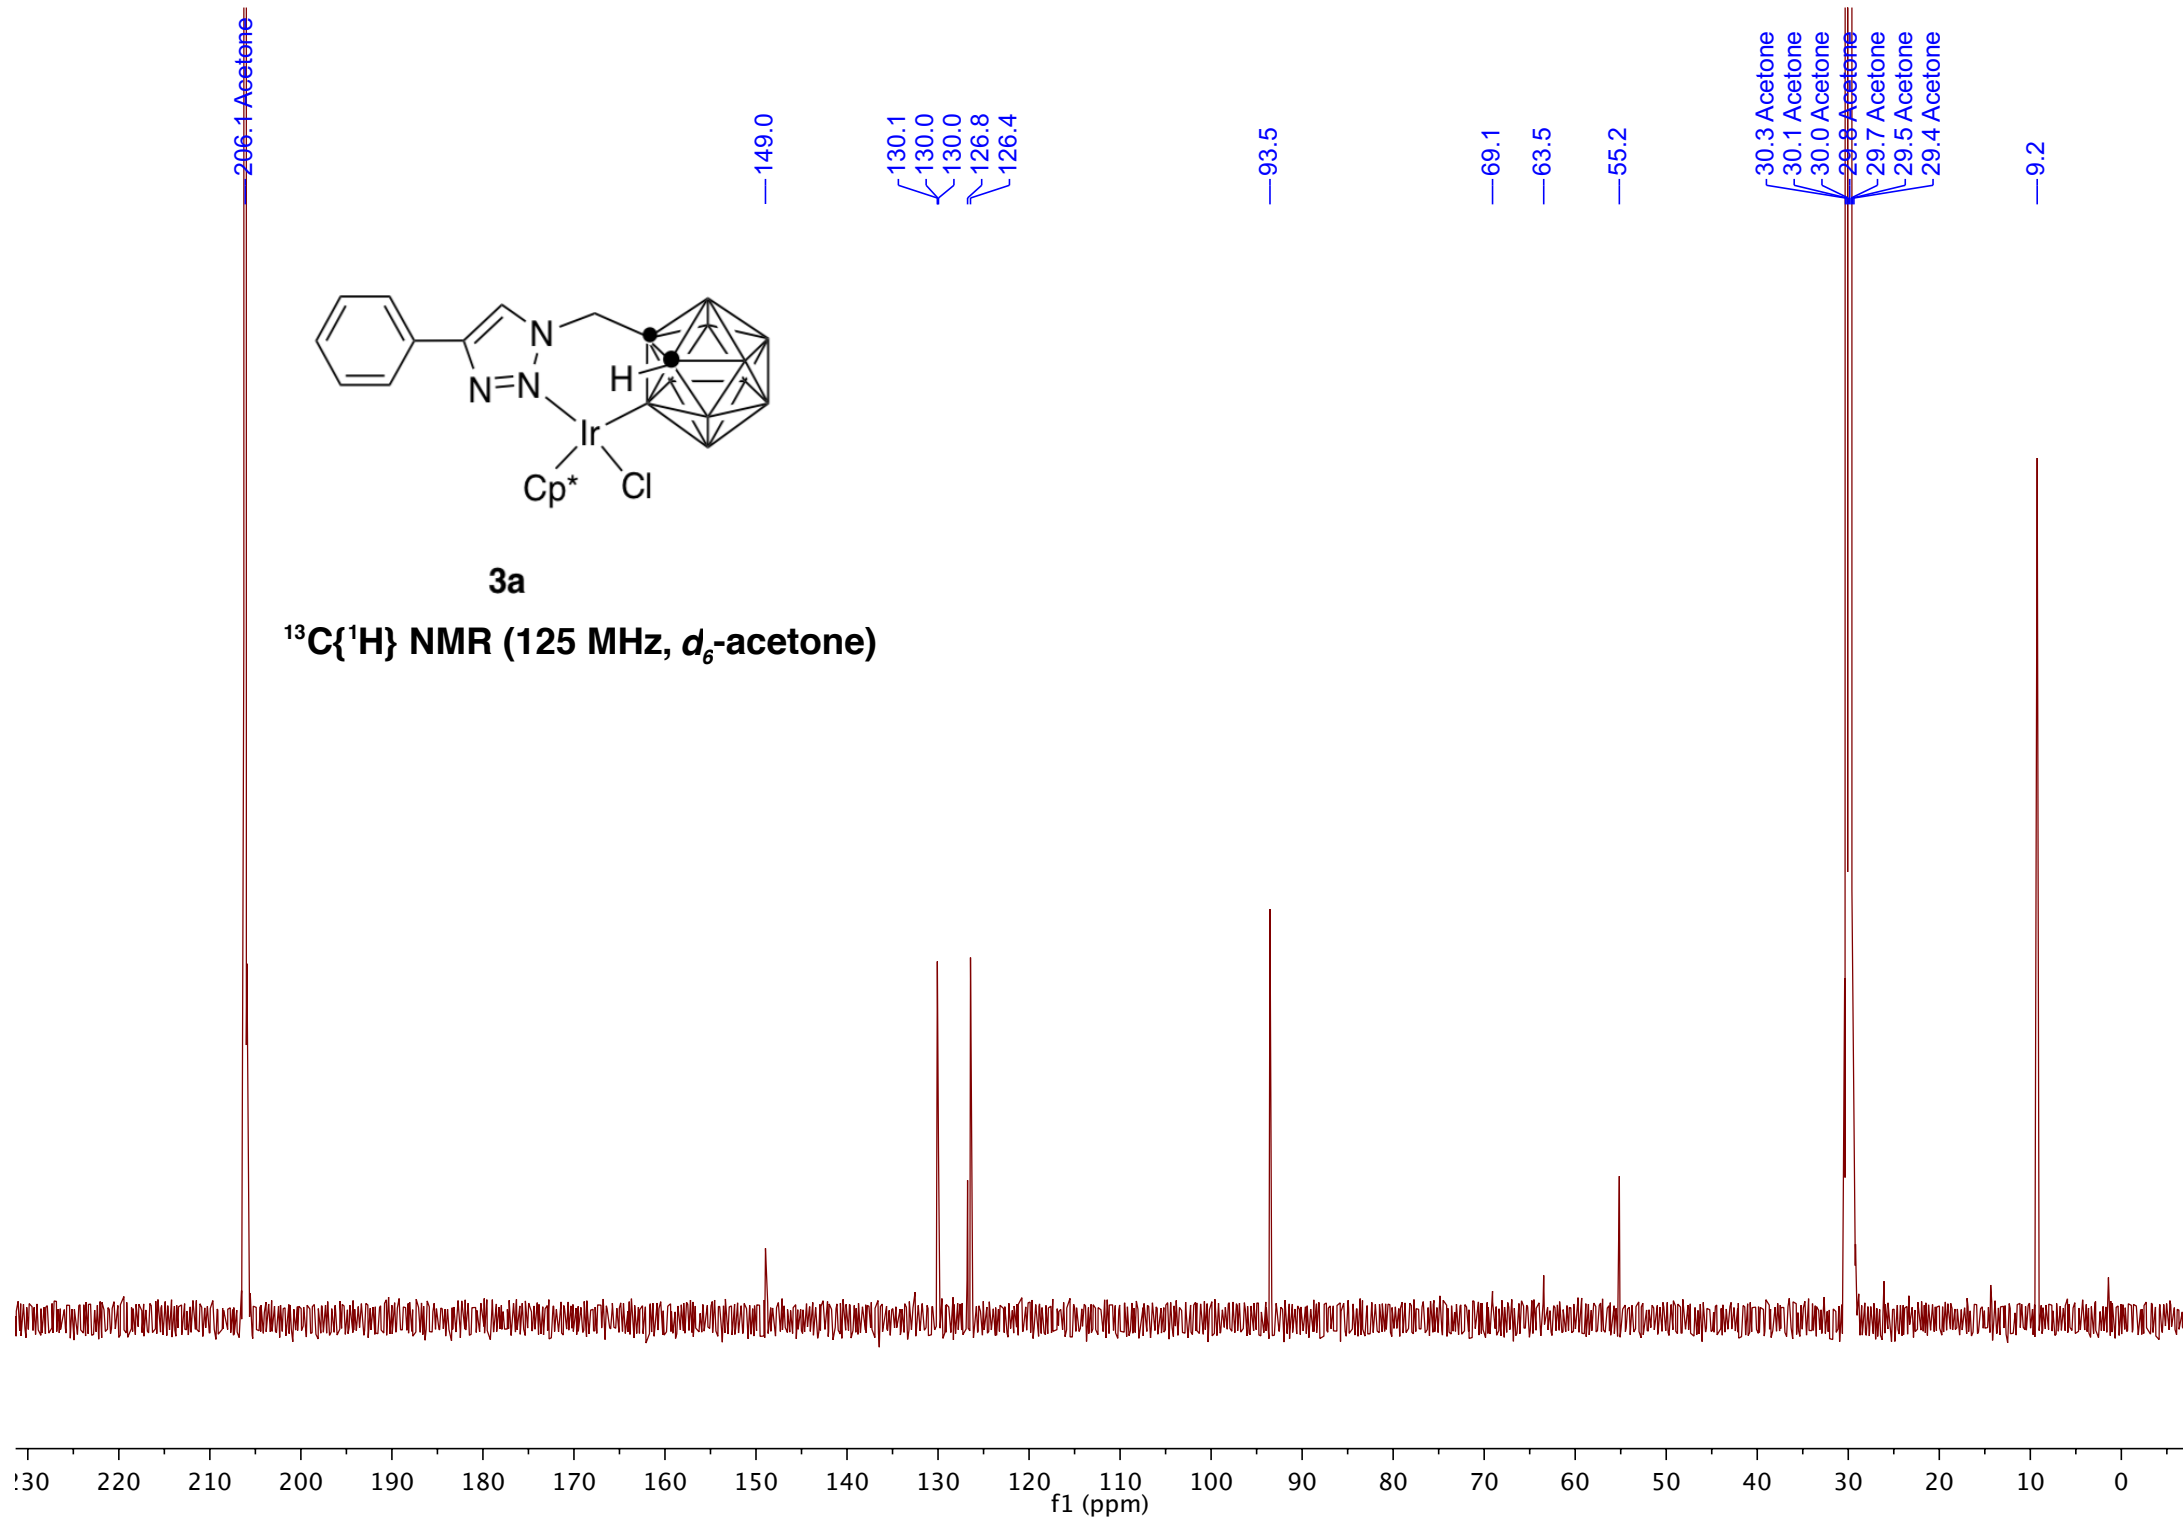

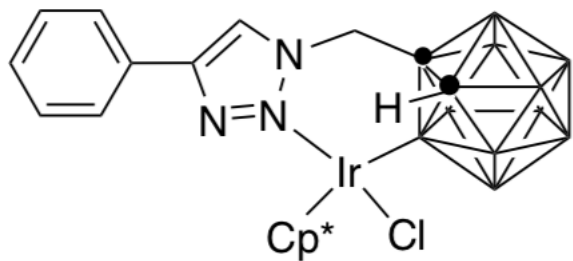

**3a**

**$^{11}\text{B}\{^1\text{H}\}$  NMR (160 MHz,  $d_6$ -acetone)**

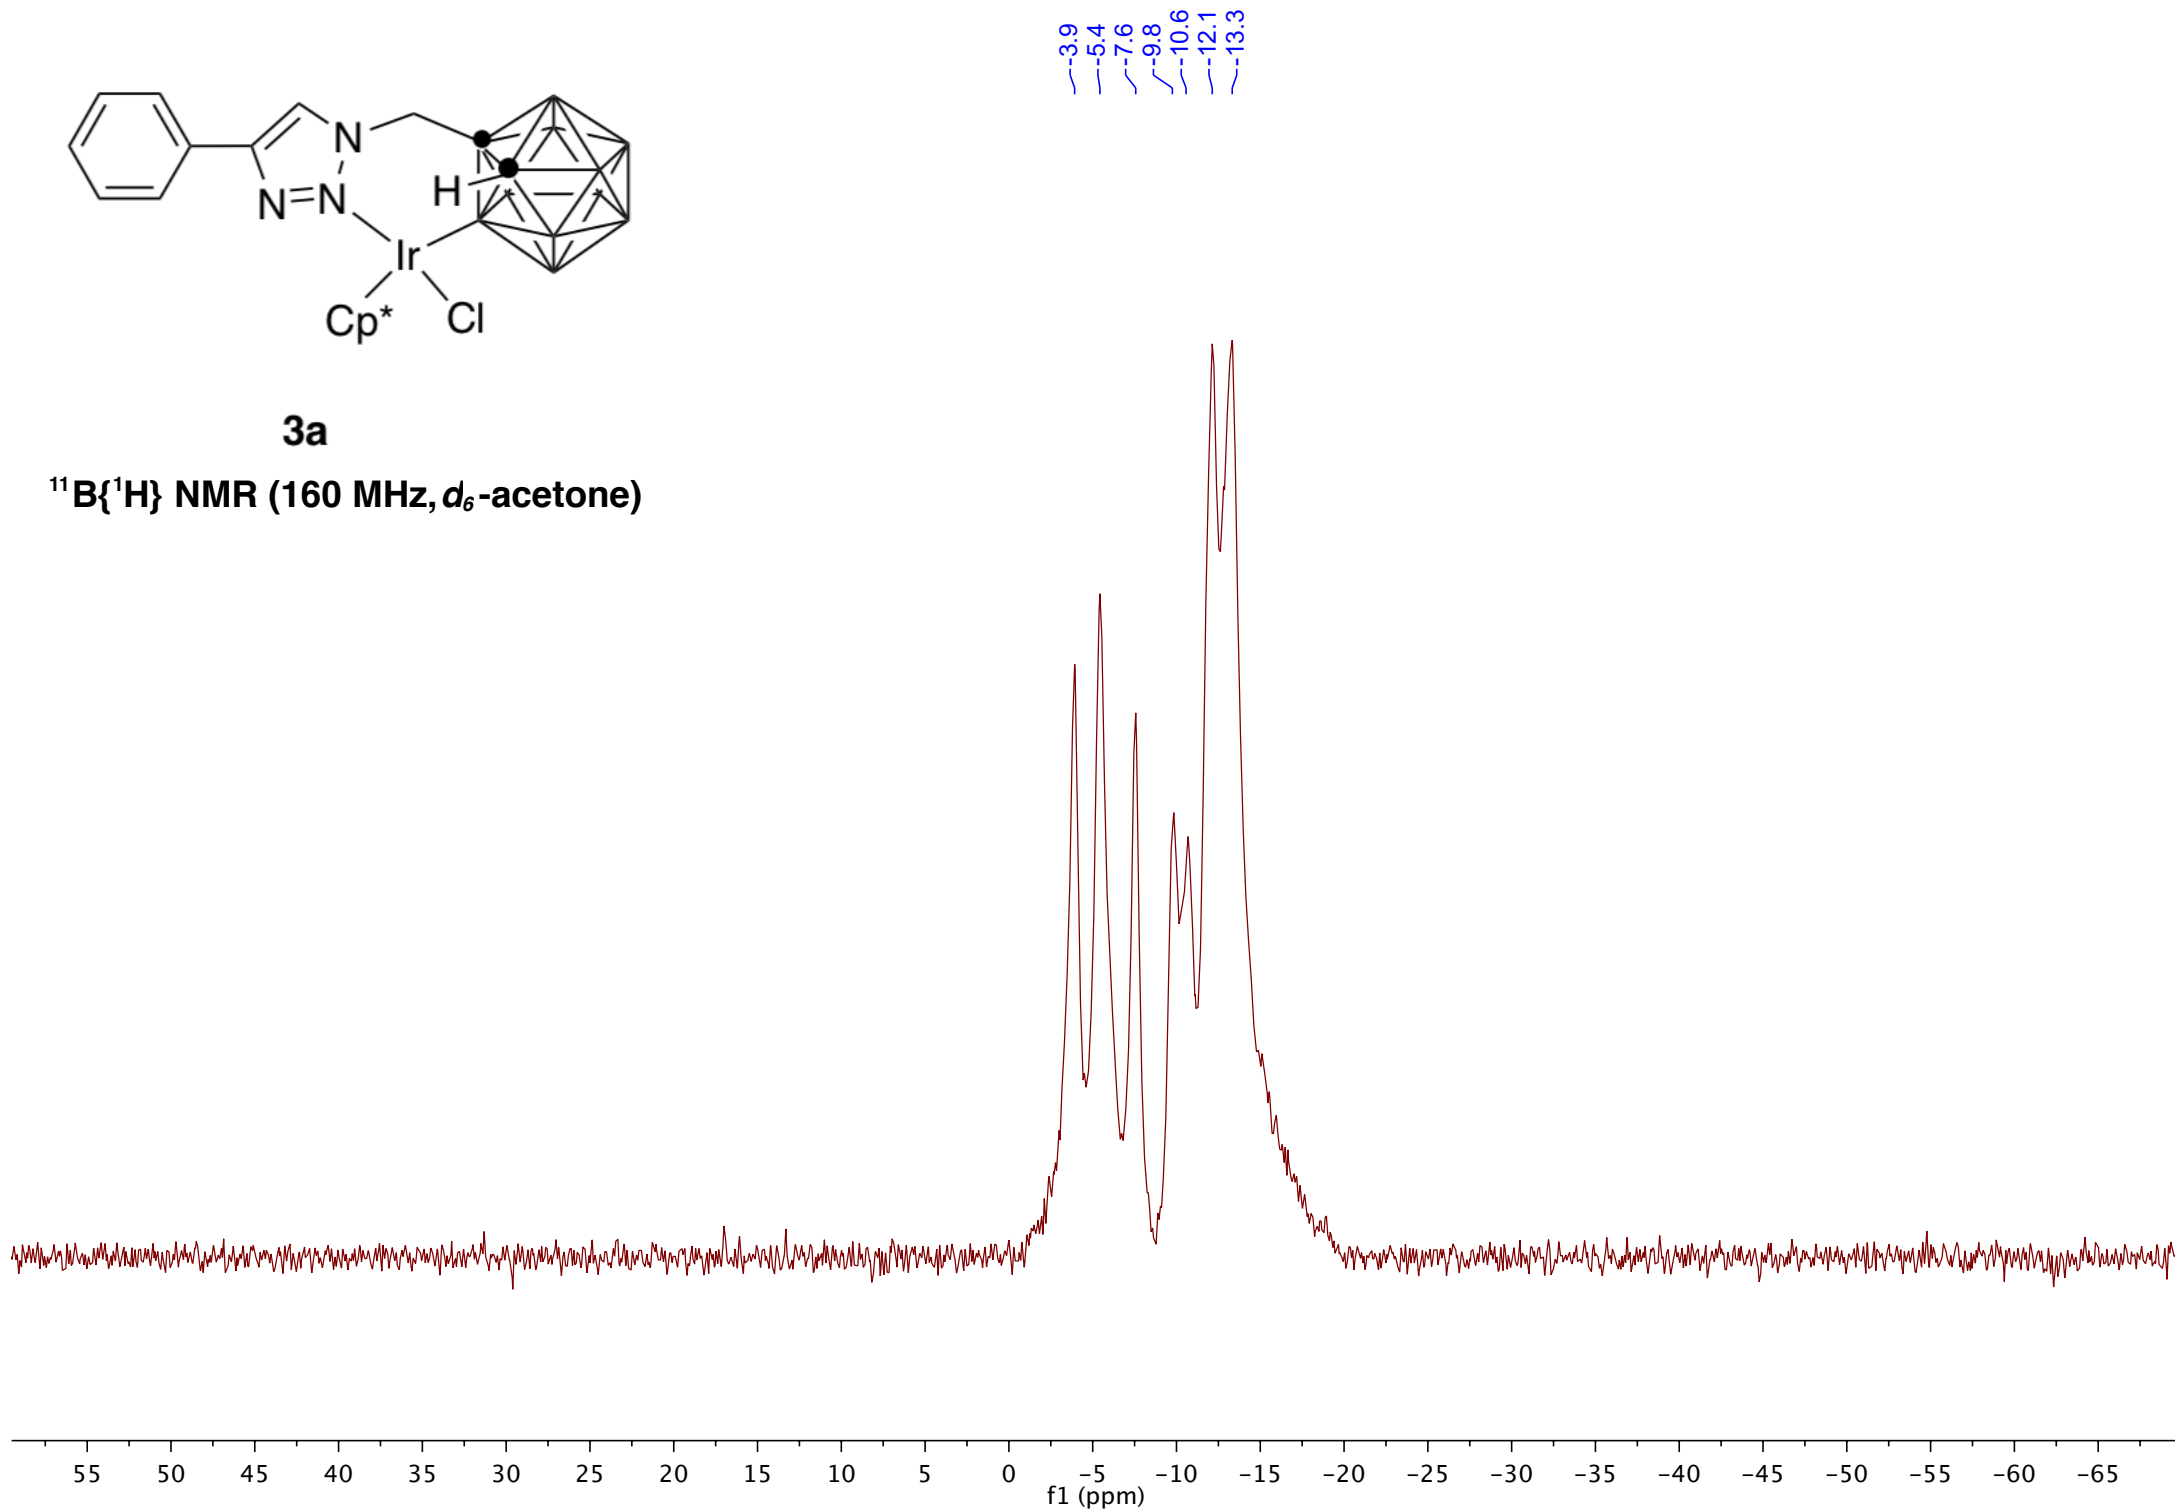

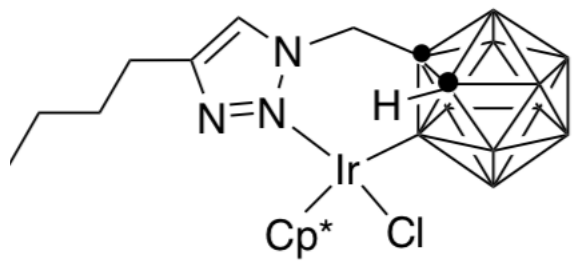

**3b**

<sup>1</sup>H NMR (500 MHz, CDCl<sub>3</sub>)

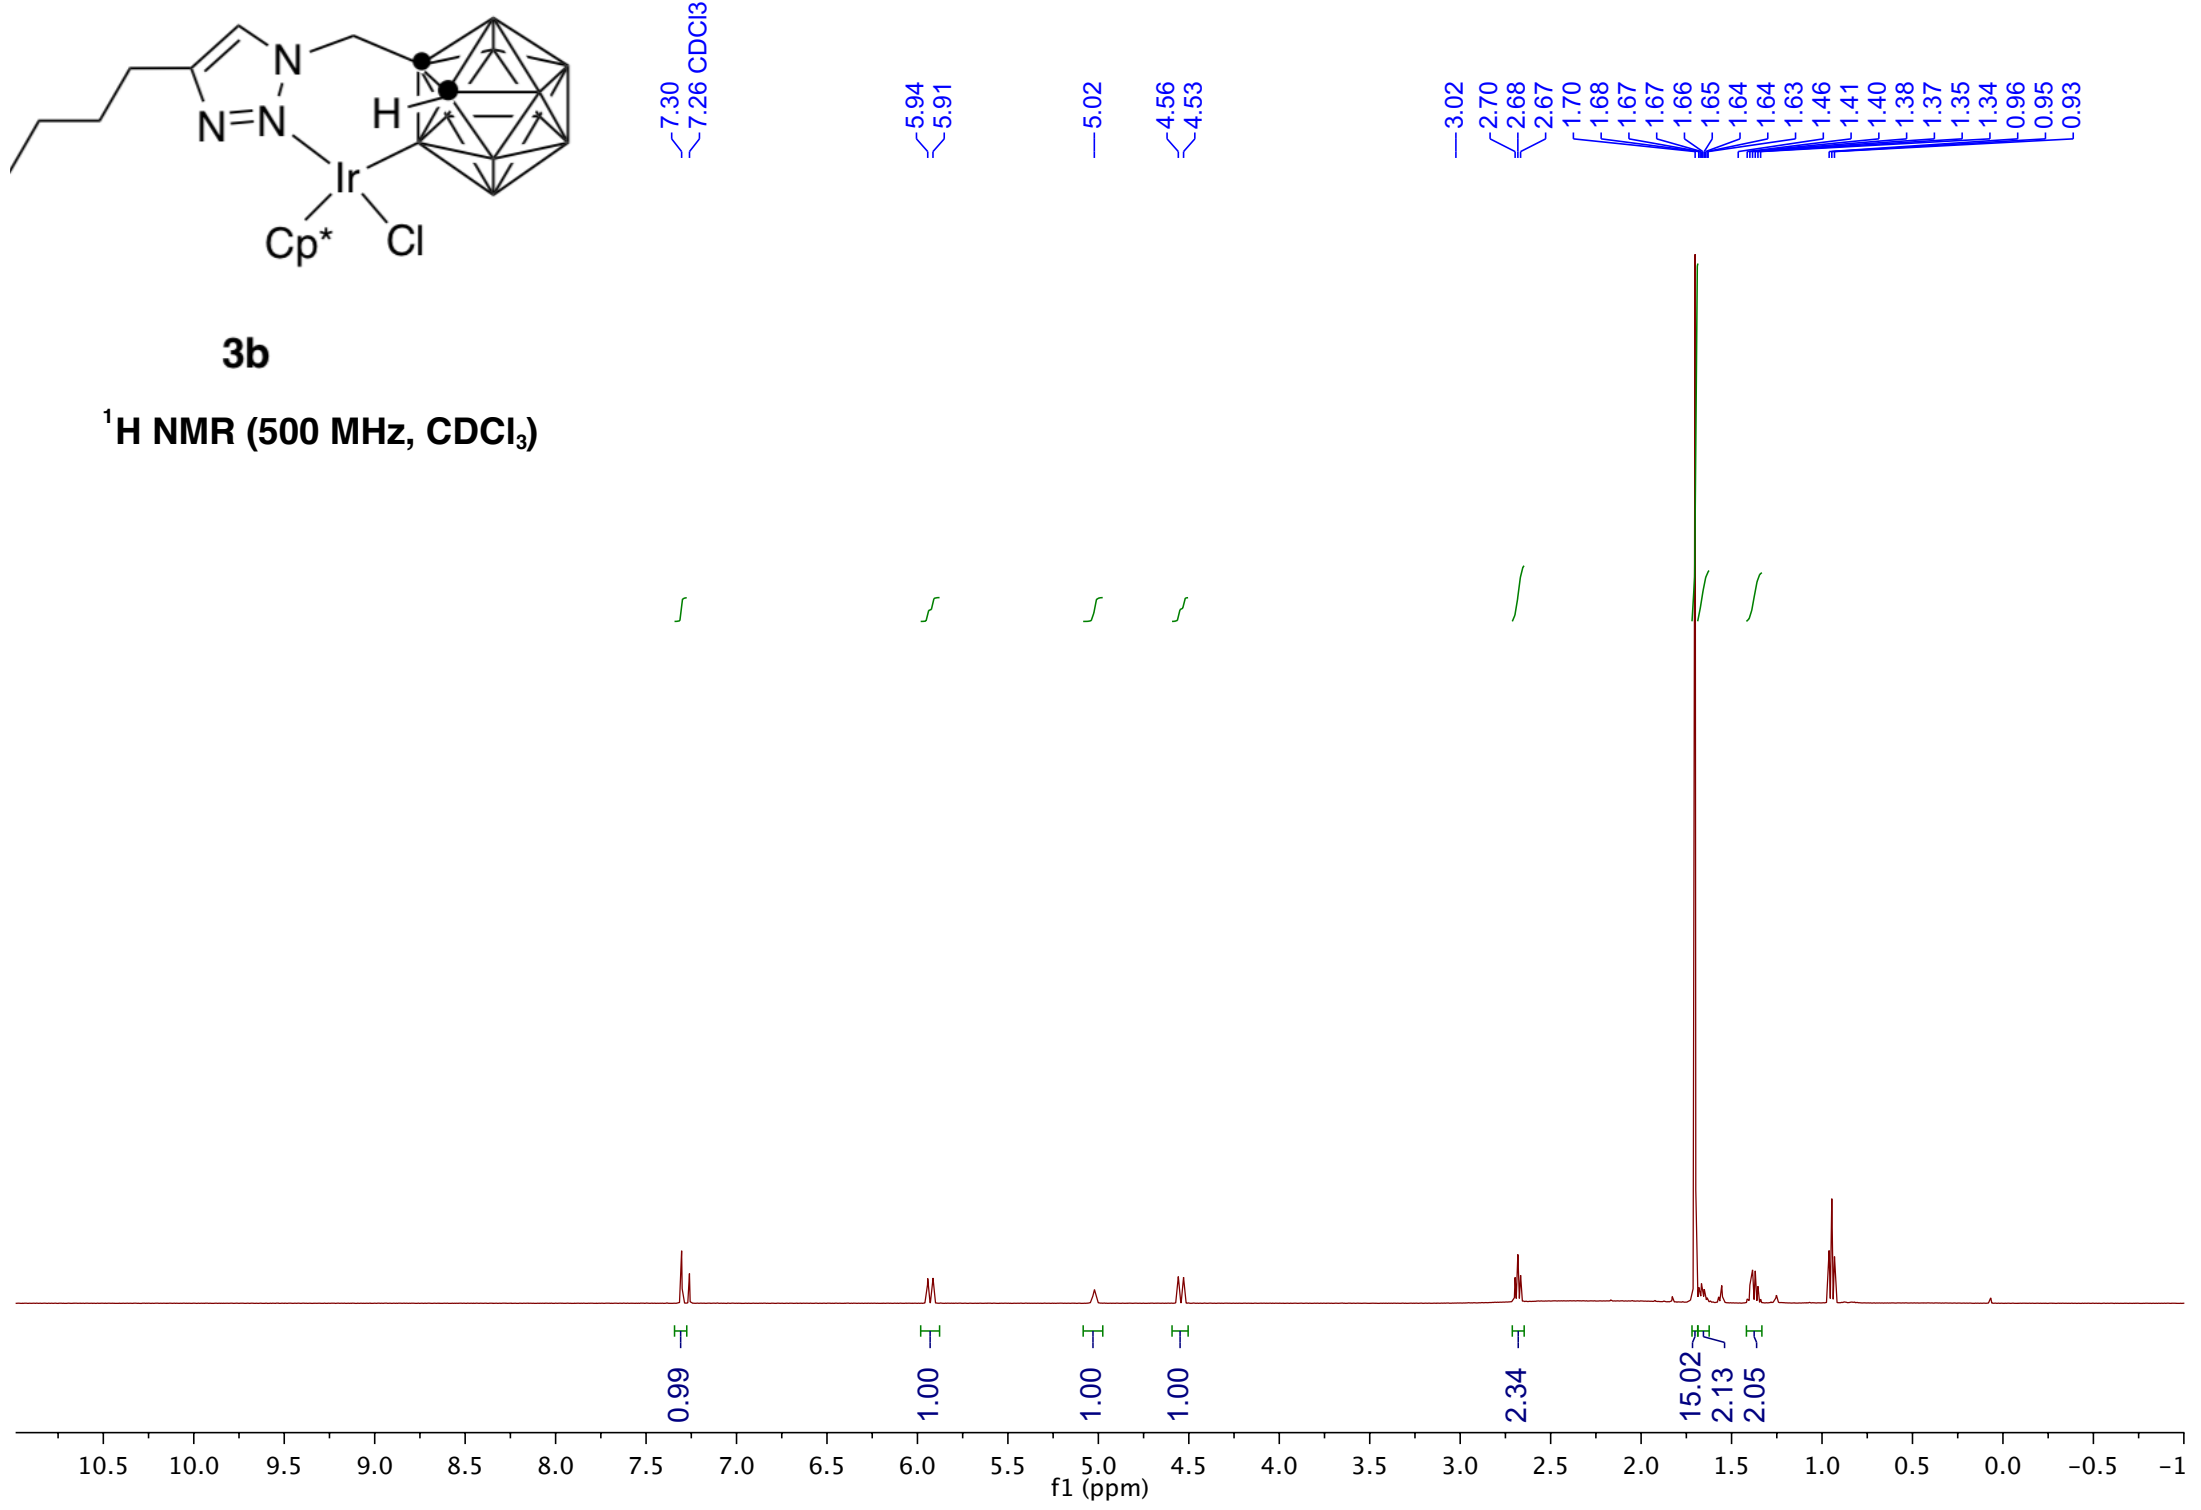

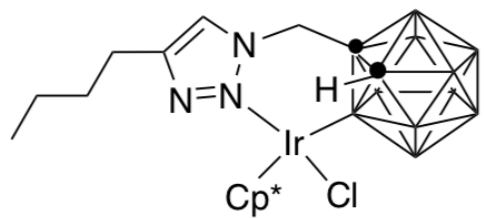

**3b**

$^{13}\text{C}\{^1\text{H}\}$  NMR (125 MHz,  $\text{CDCl}_3$ )

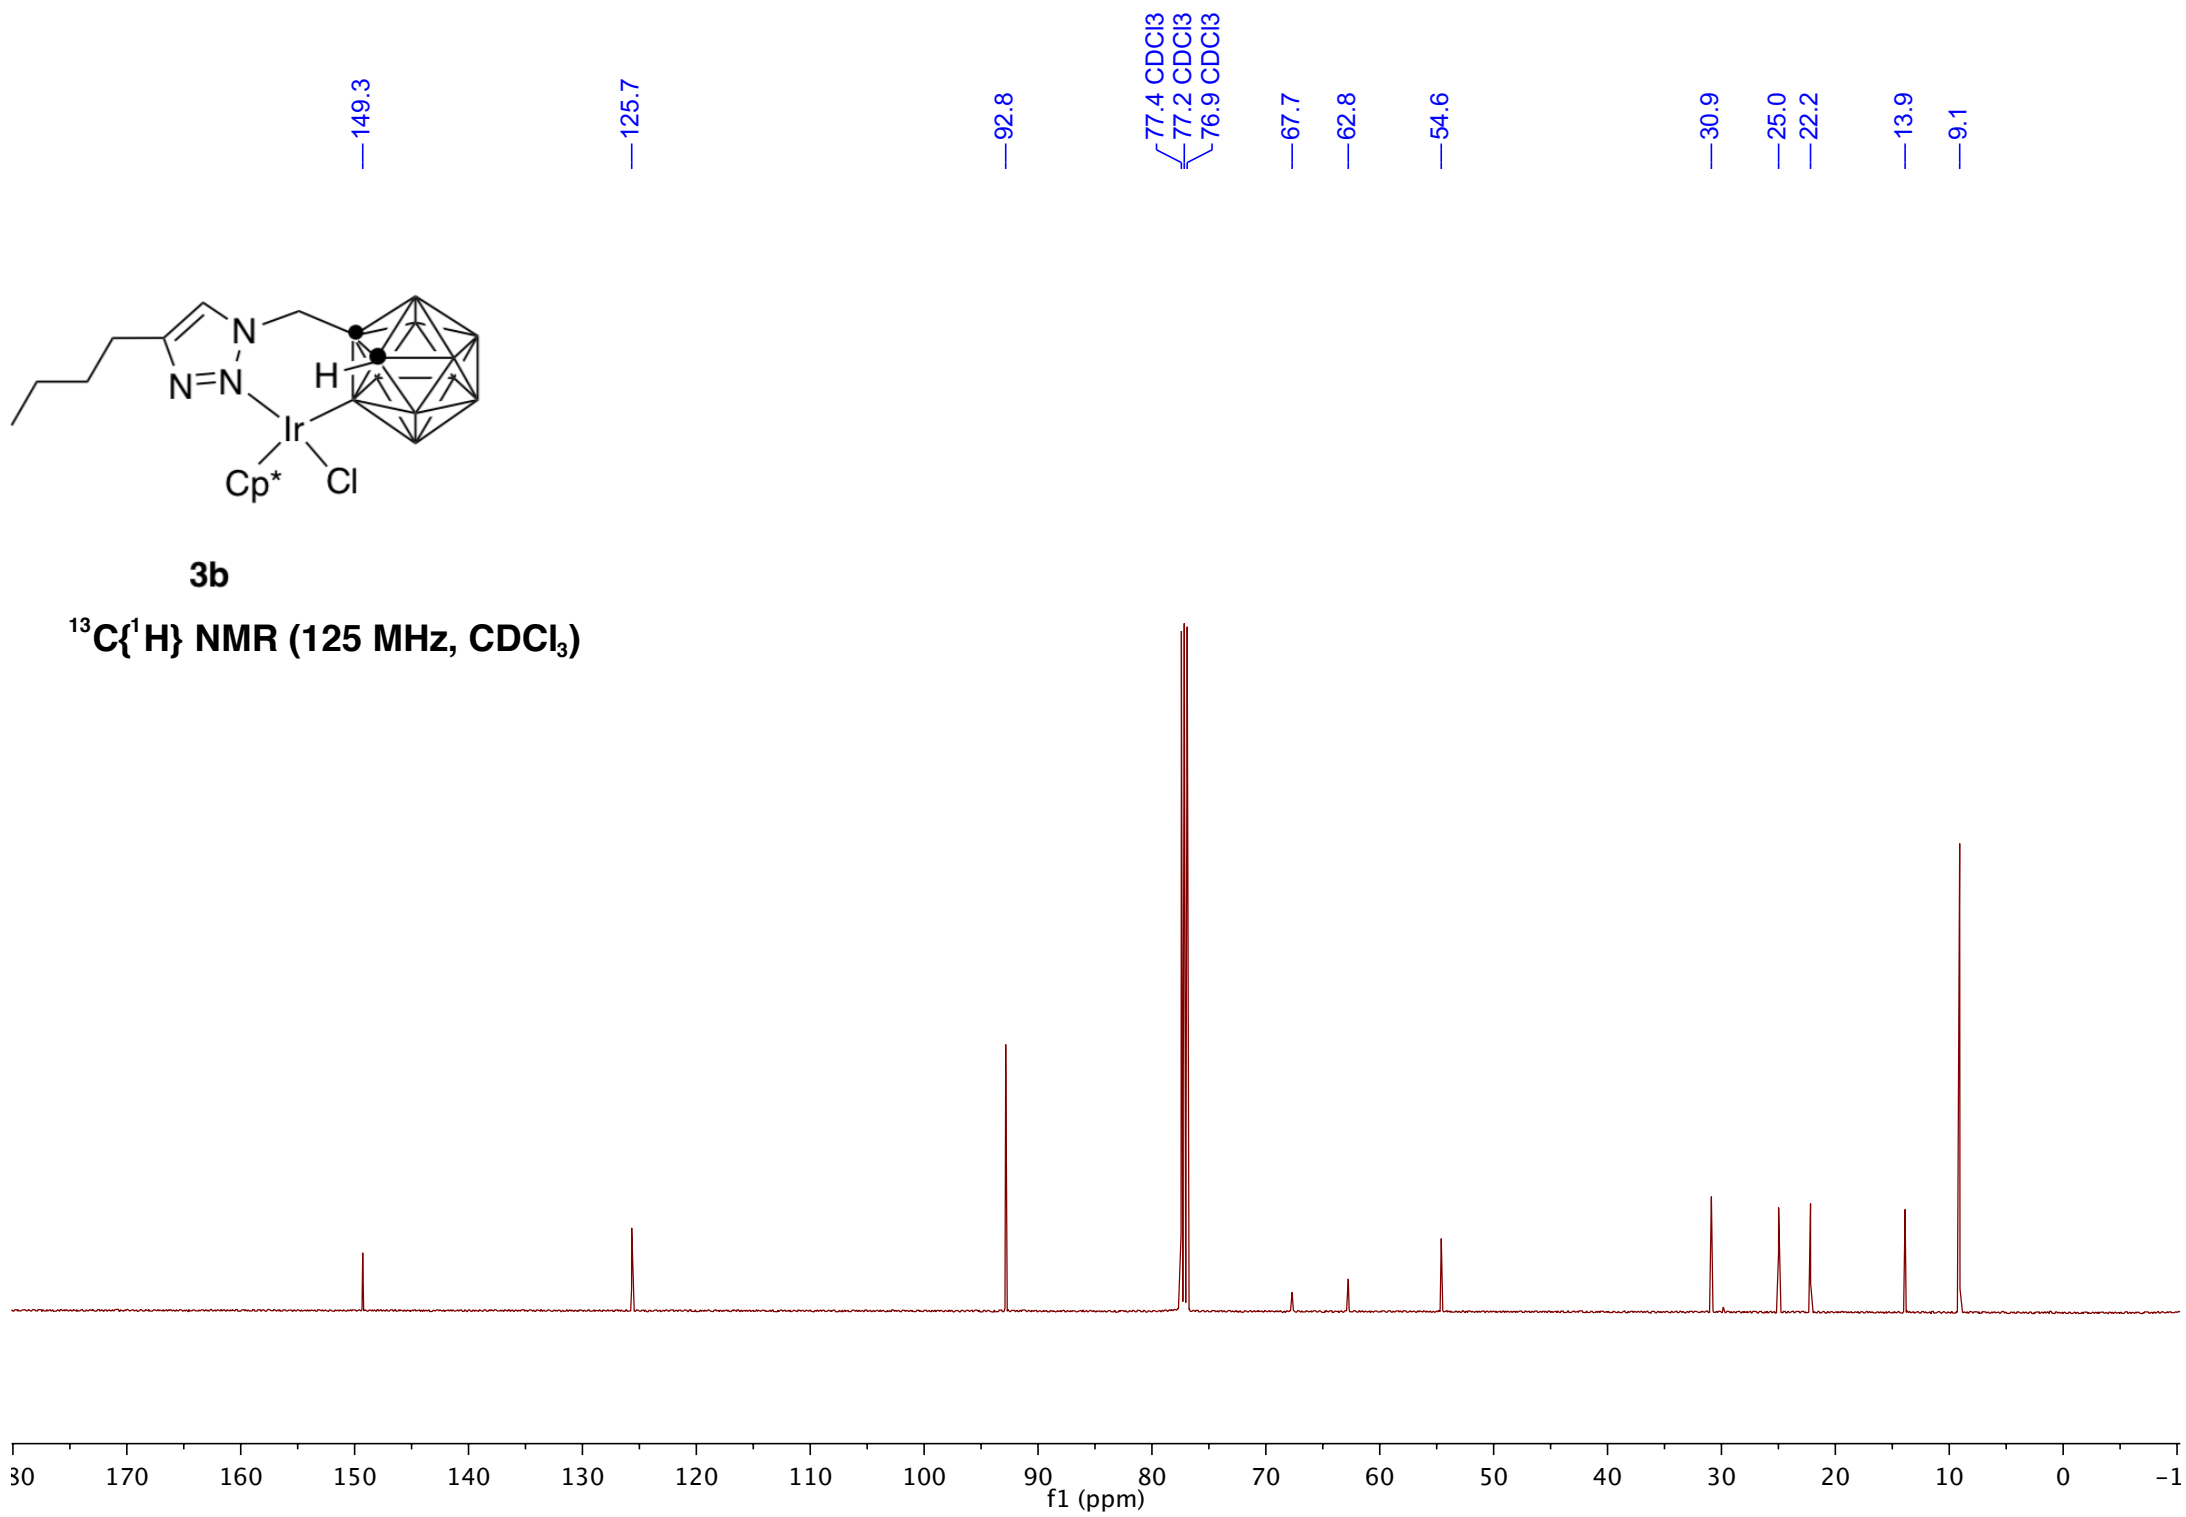



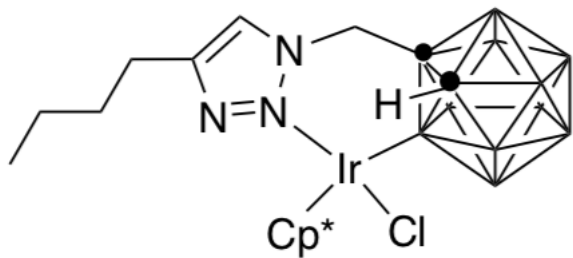

**3b**

$^{11}\text{B}\{^1\text{H}\}$  NMR (160 MHz,  $d_6$ -acetone)

~3.8  
~5.2  
~7.4  
~11.8  
~13.0

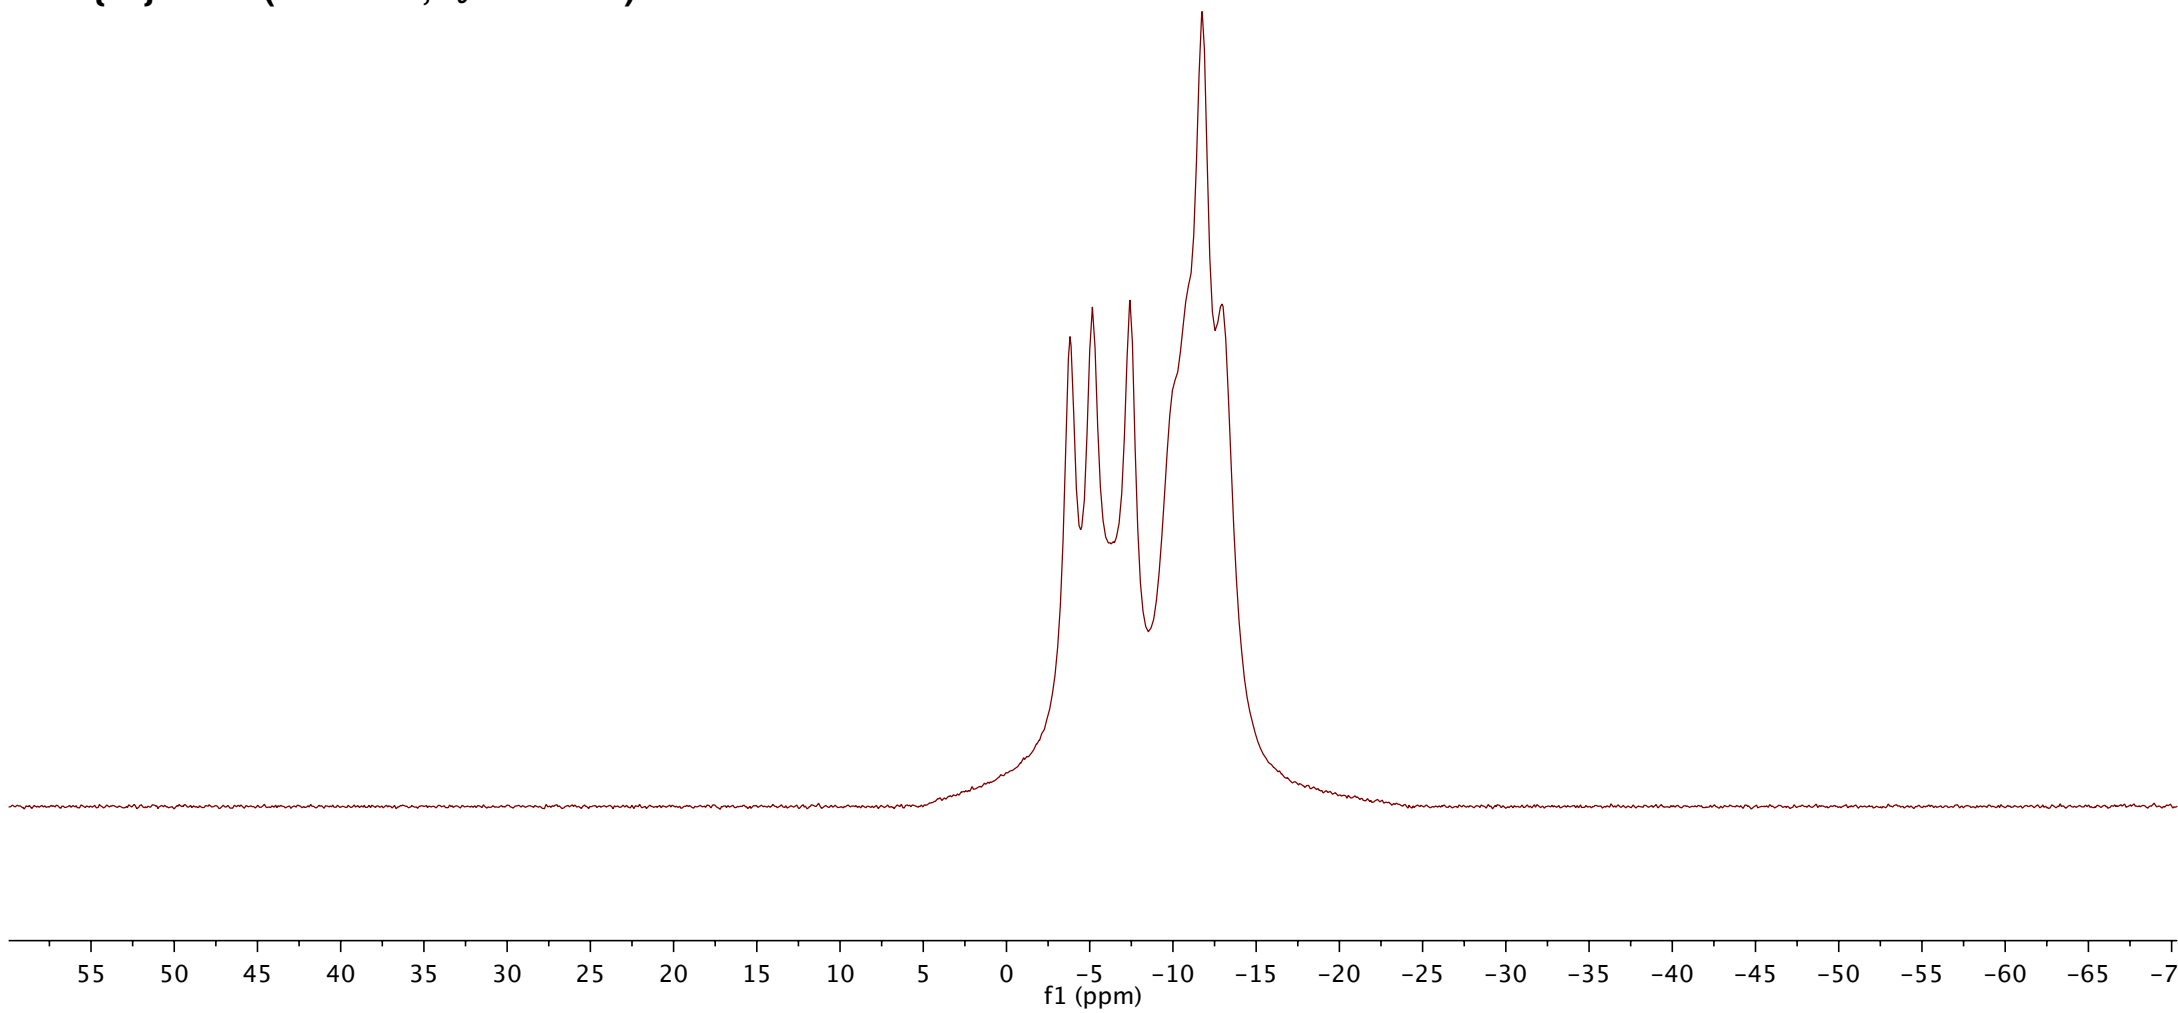

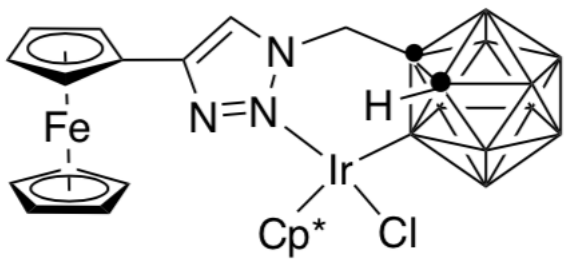

**3c**

**<sup>1</sup>H NMR (300 MHz, CDCl<sub>3</sub>)**

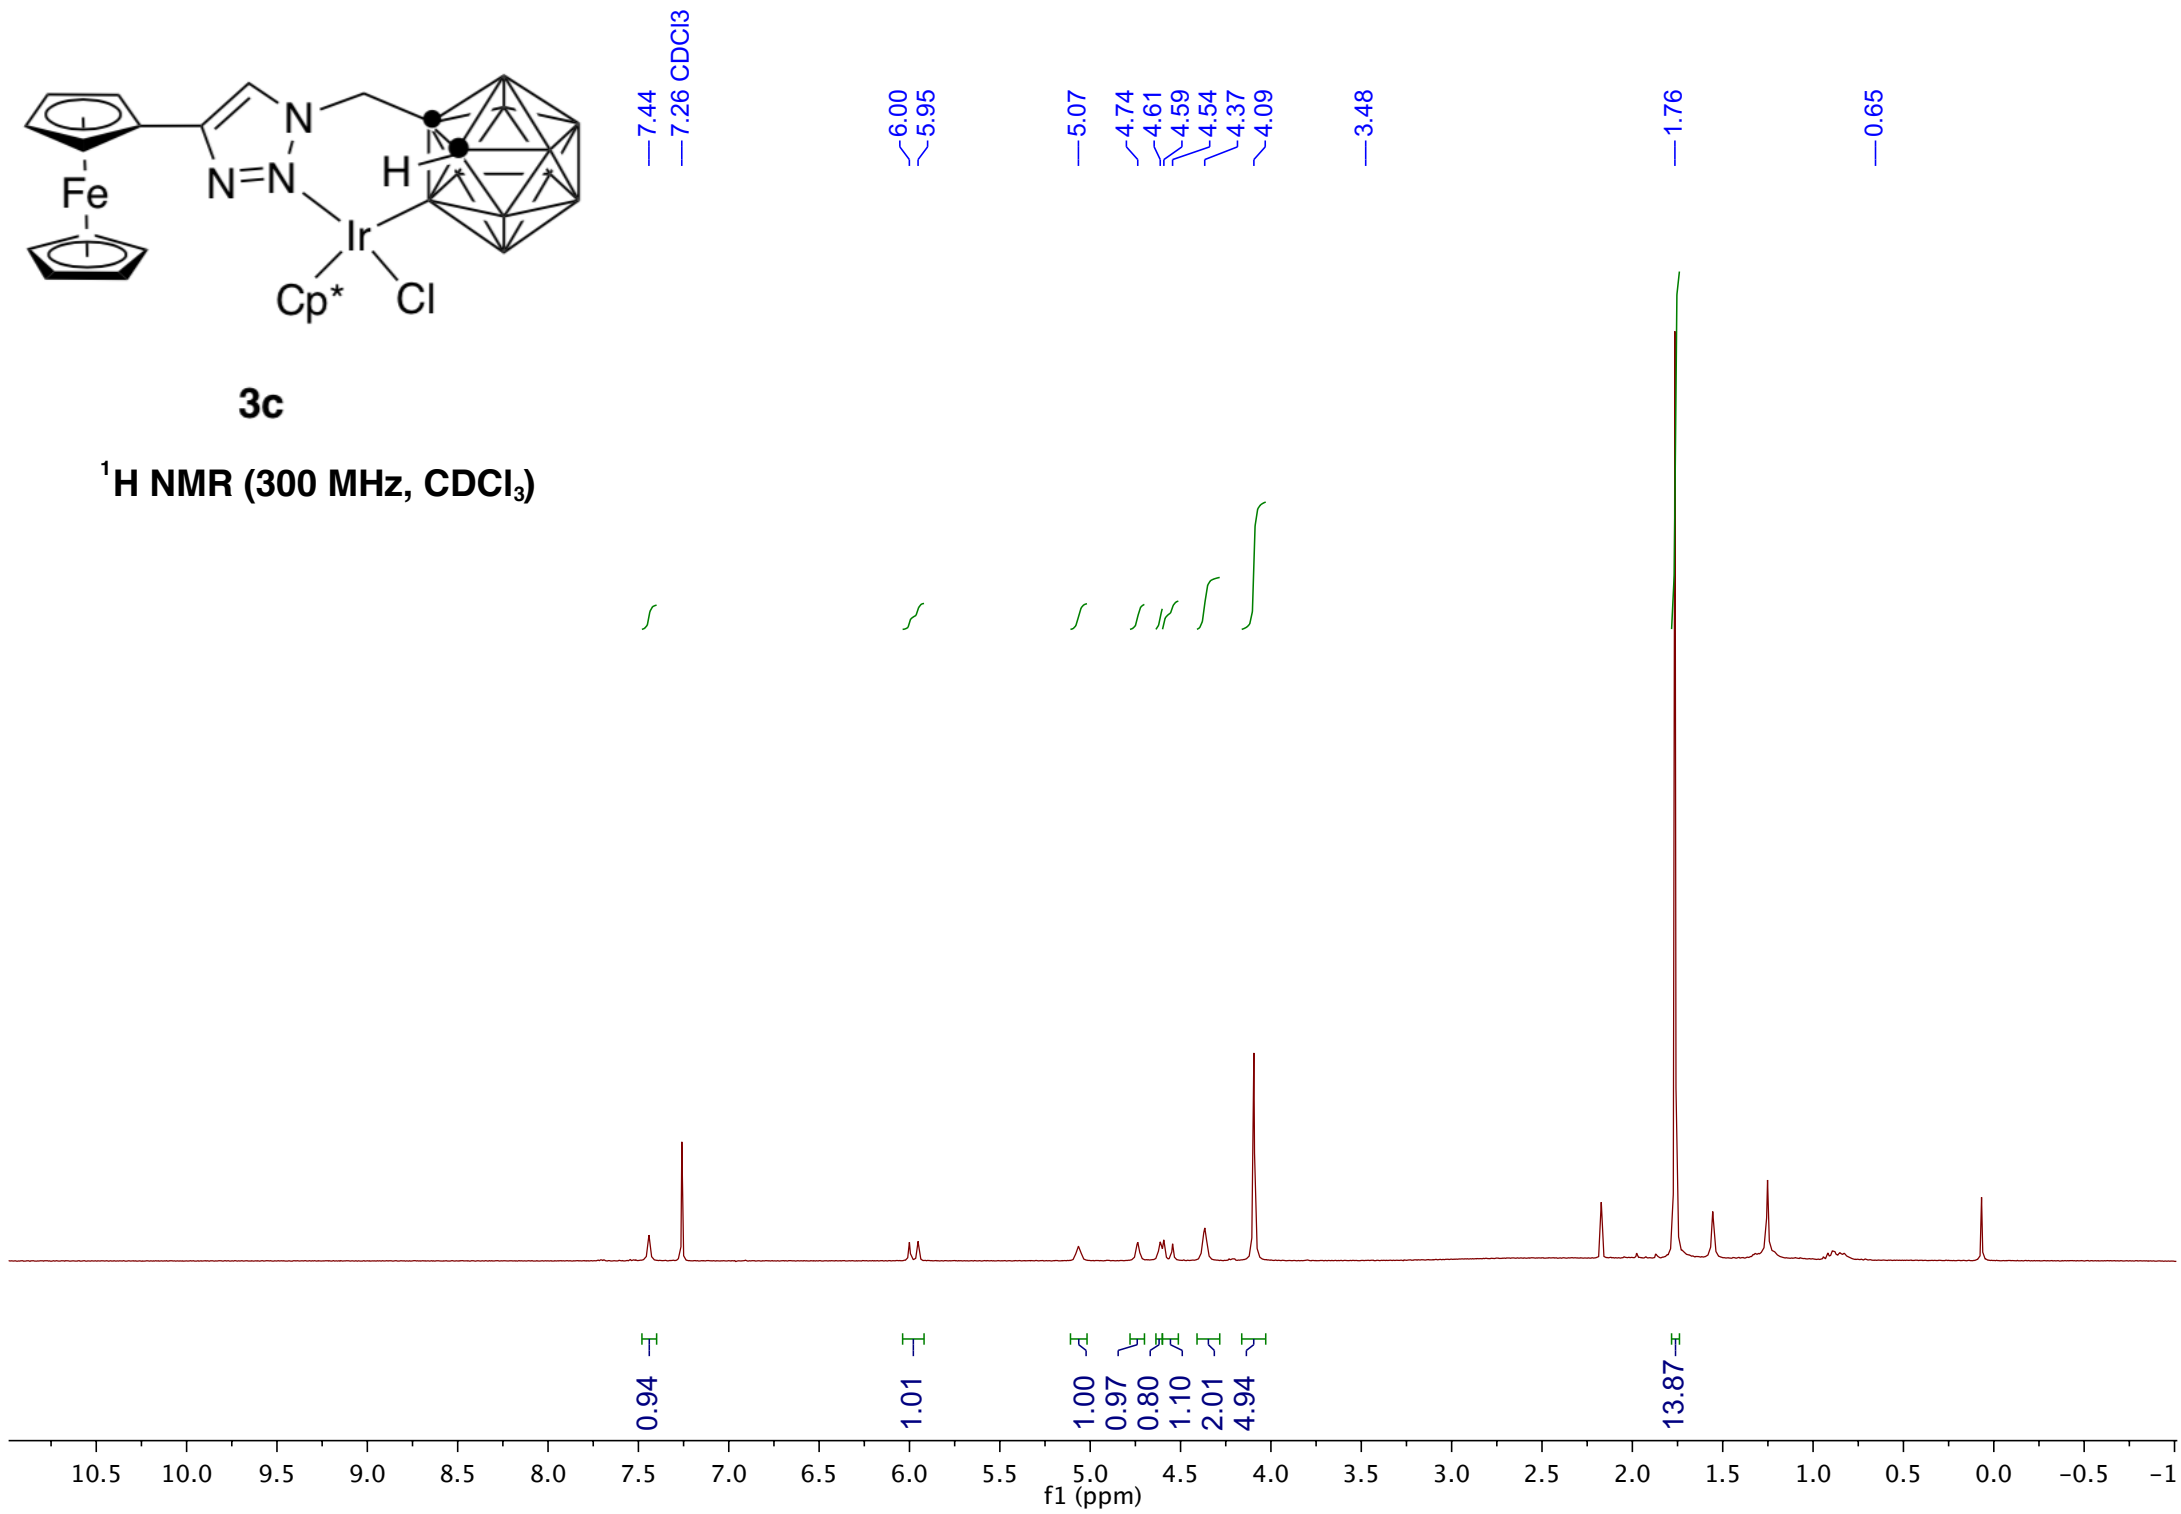

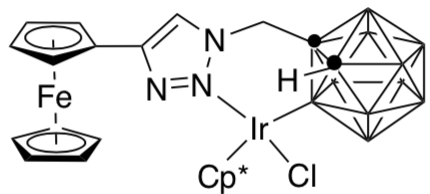

**3c**

**$^{13}\text{C}\{^1\text{H}\}$  NMR (75 MHz,  $\text{CDCl}_3$ )**

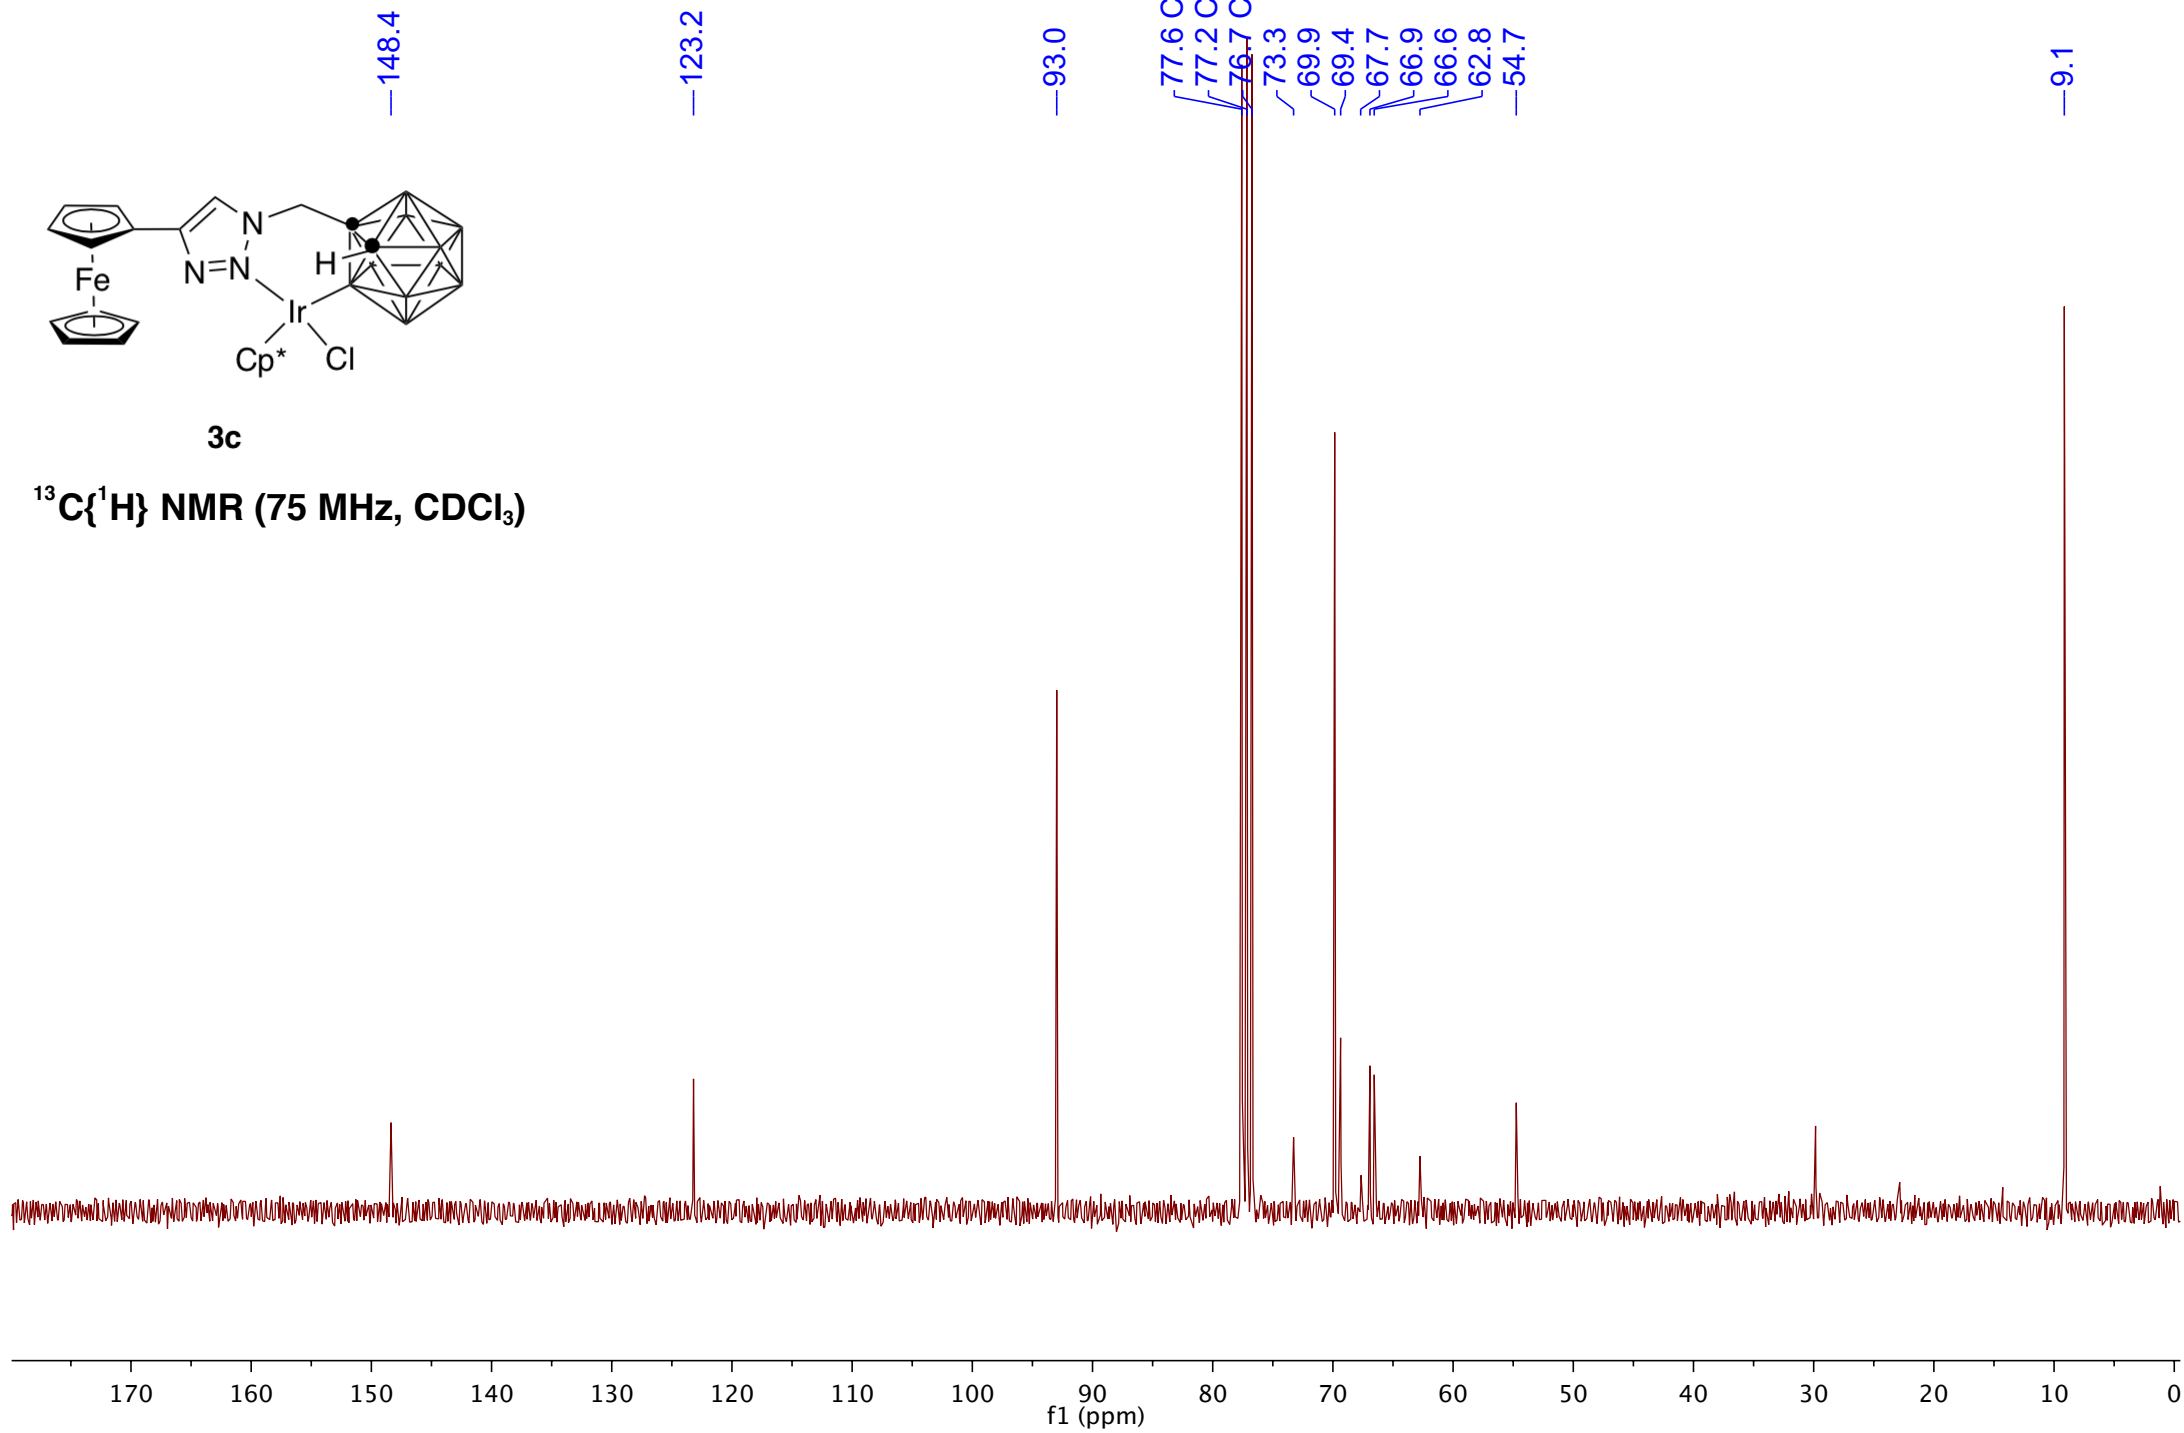

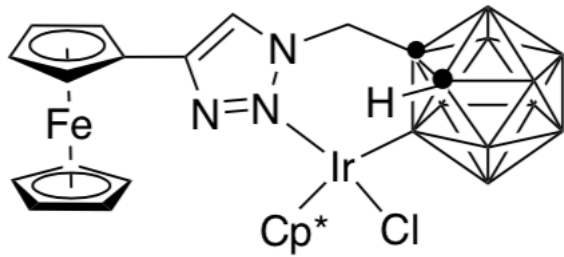

**3c**

**$^{11}\text{B}\{^1\text{H}\}$ NMR (160 MHz,  $\text{CDCl}_3$ )**

~3.3  
~4.4  
~5.5  
~6.9  
~7.8  
~11.3  
~12.3

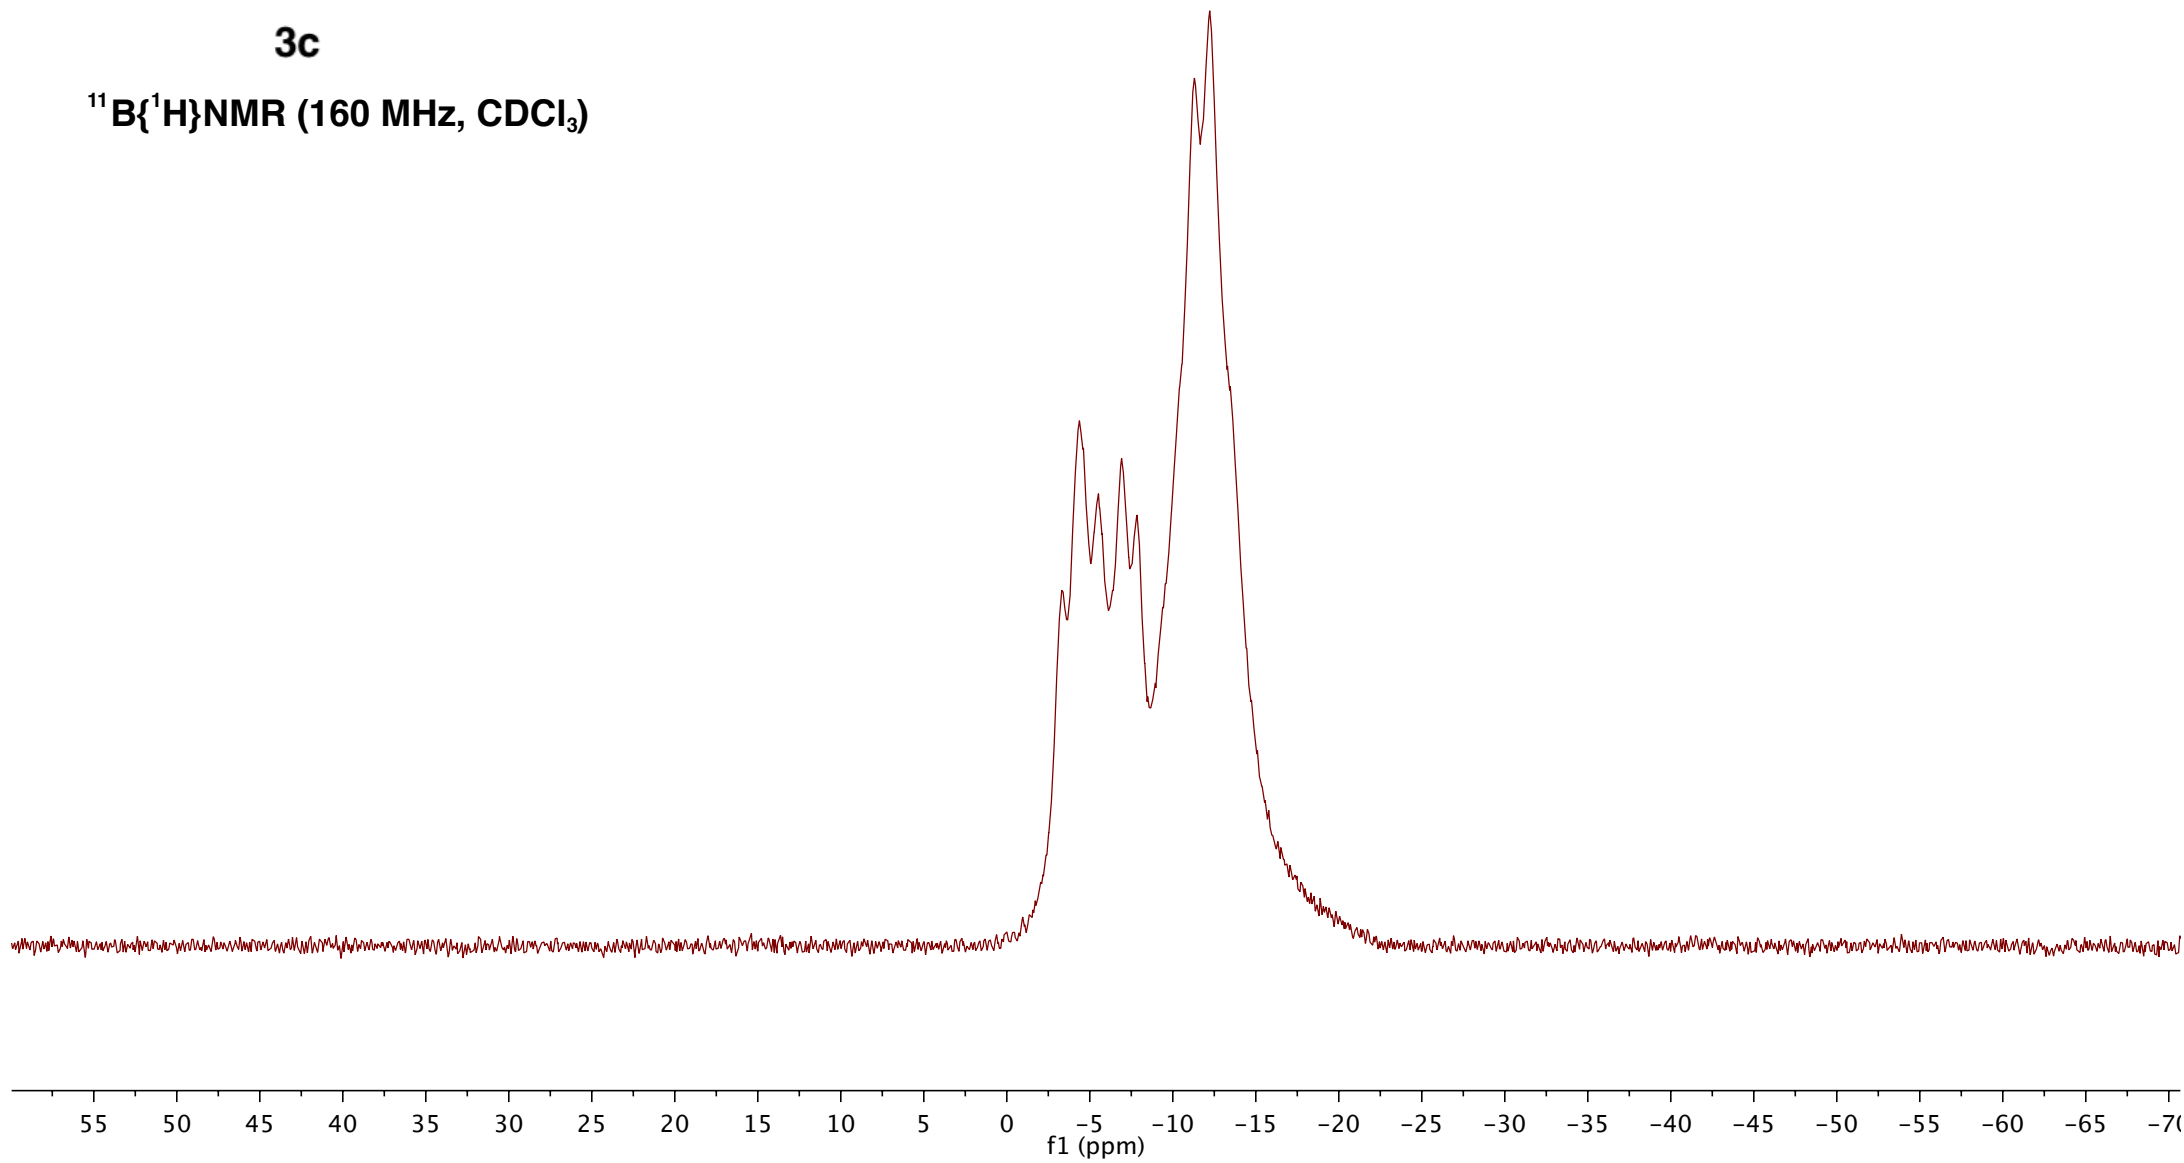

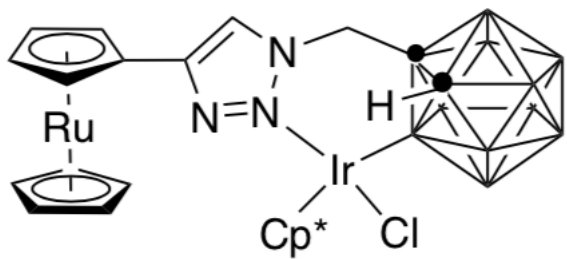

**3d**

**<sup>1</sup>H NMR (300 MHz, CDCl<sub>3</sub>)**

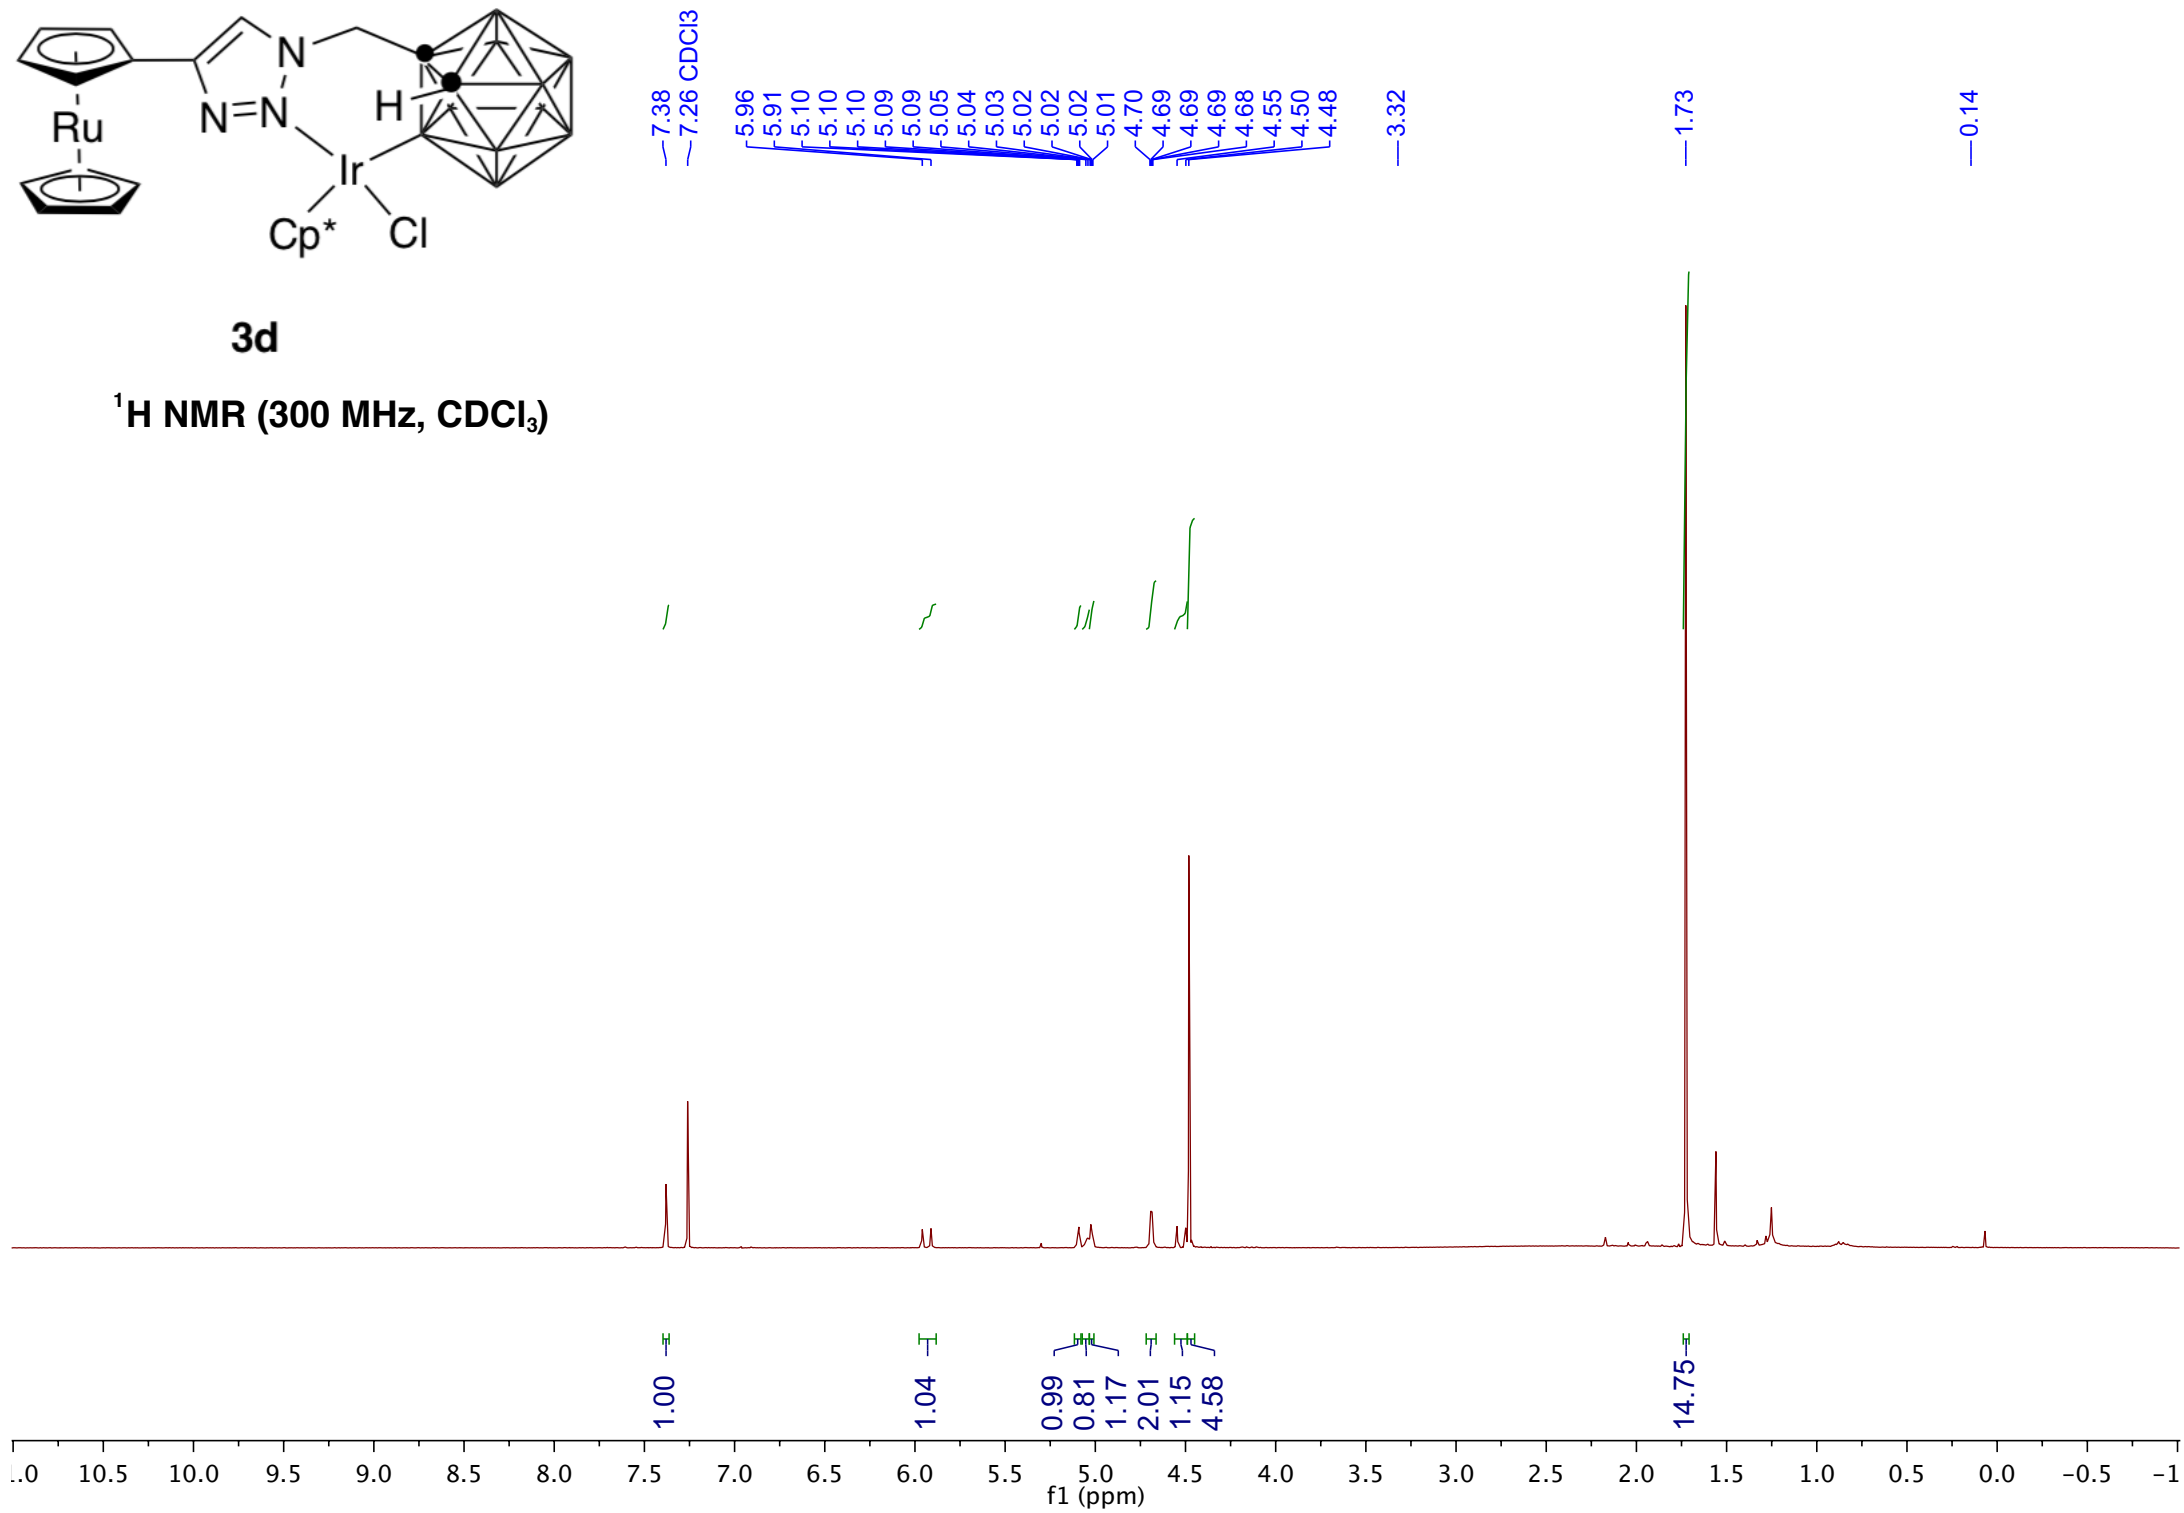

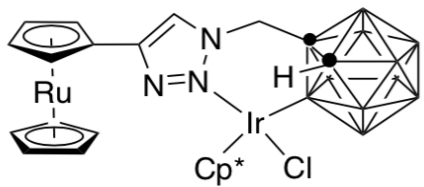

**3d**

$^{13}\text{C}\{^1\text{H}\}$  NMR (75 MHz,  $\text{CDCl}_3$ )

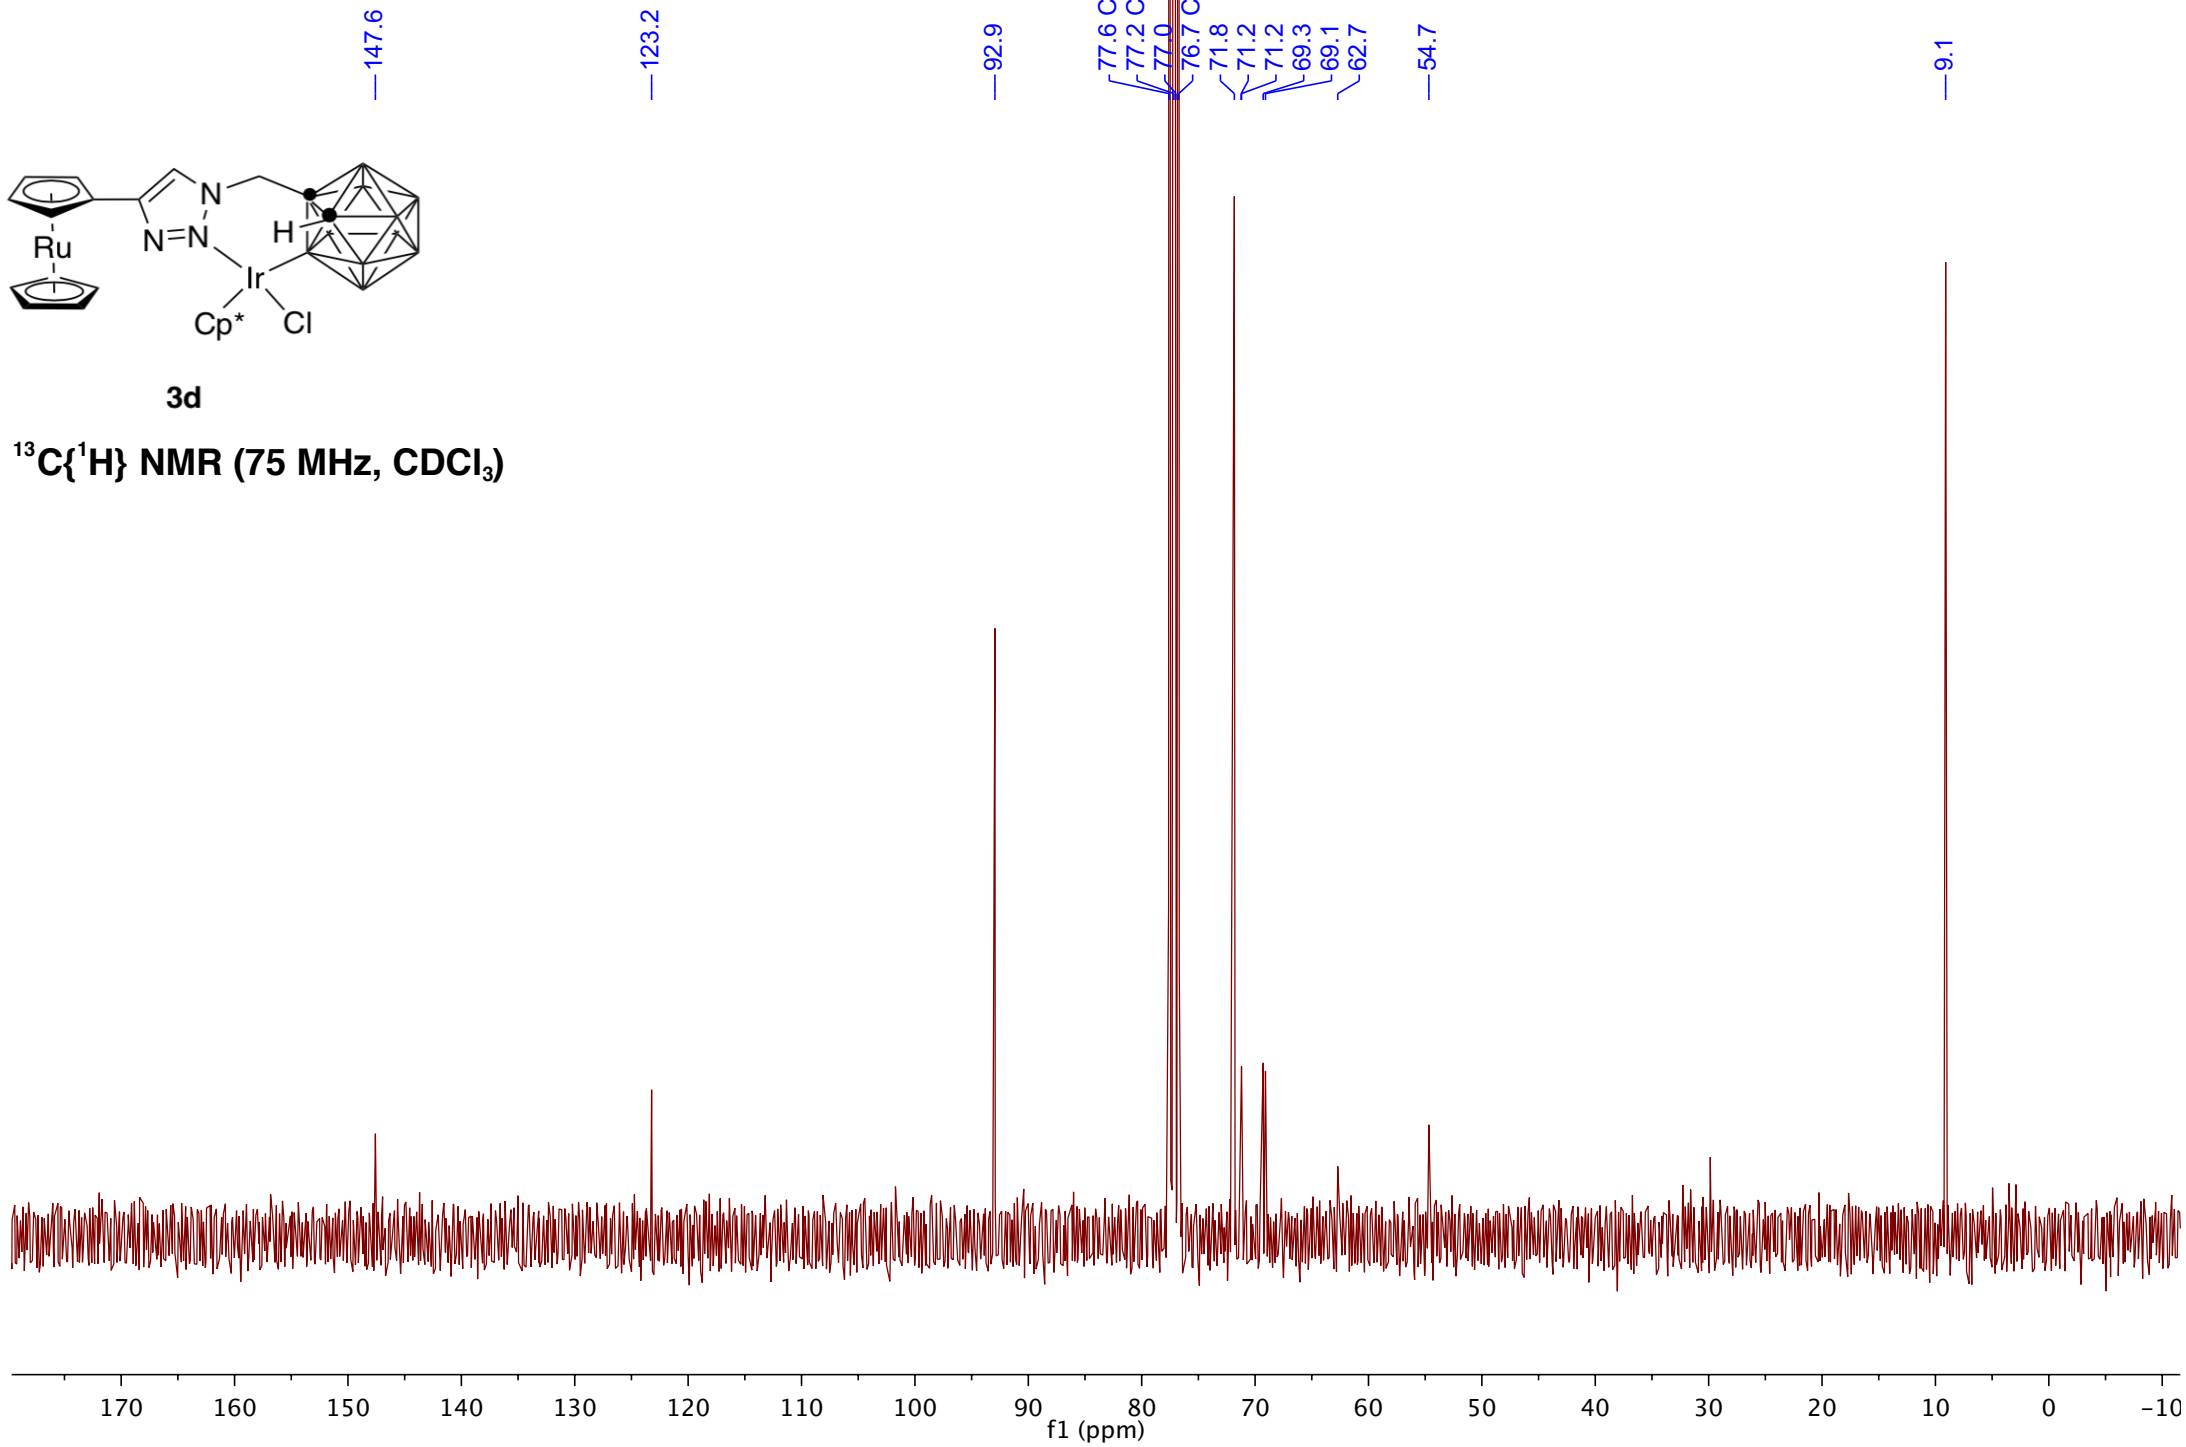

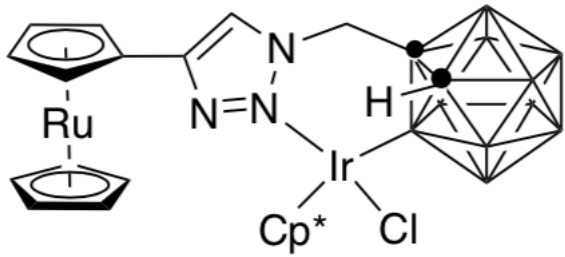

**3d**

**$^{11}\text{B}\{^1\text{H}\}$  NMR (160 MHz,  $d_6$ -acetone)**

3.9  
5.2  
7.6  
11.8  
12.2  
13.3

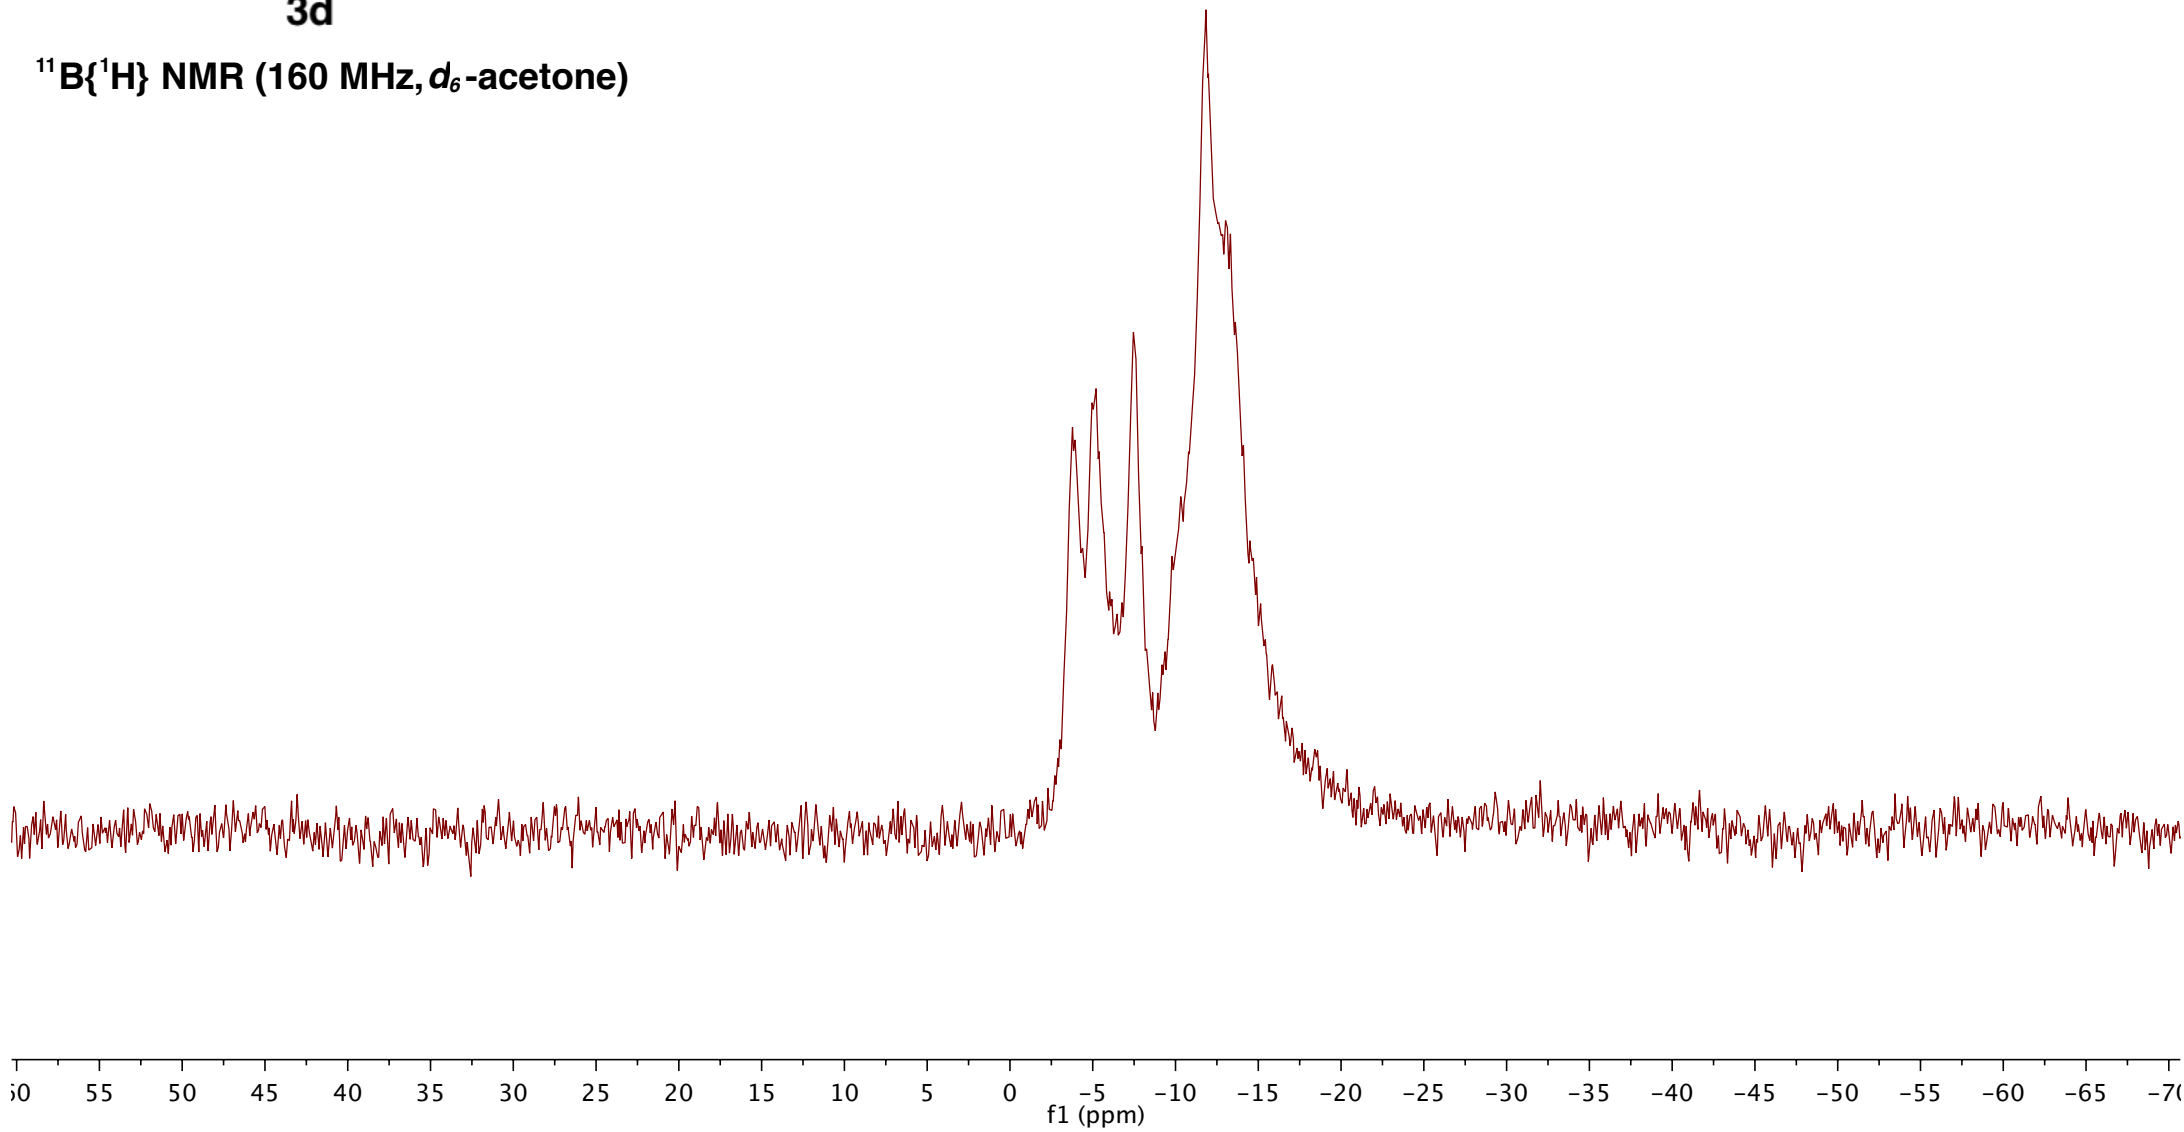

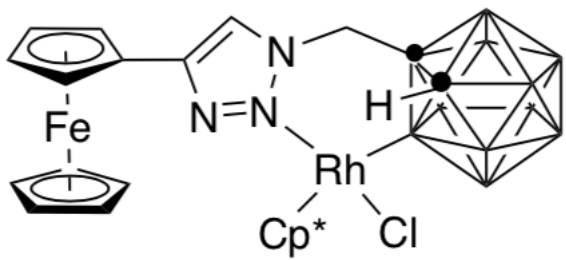

**4c**

<sup>1</sup>H NMR (300 MHz, CDCl<sub>3</sub>)

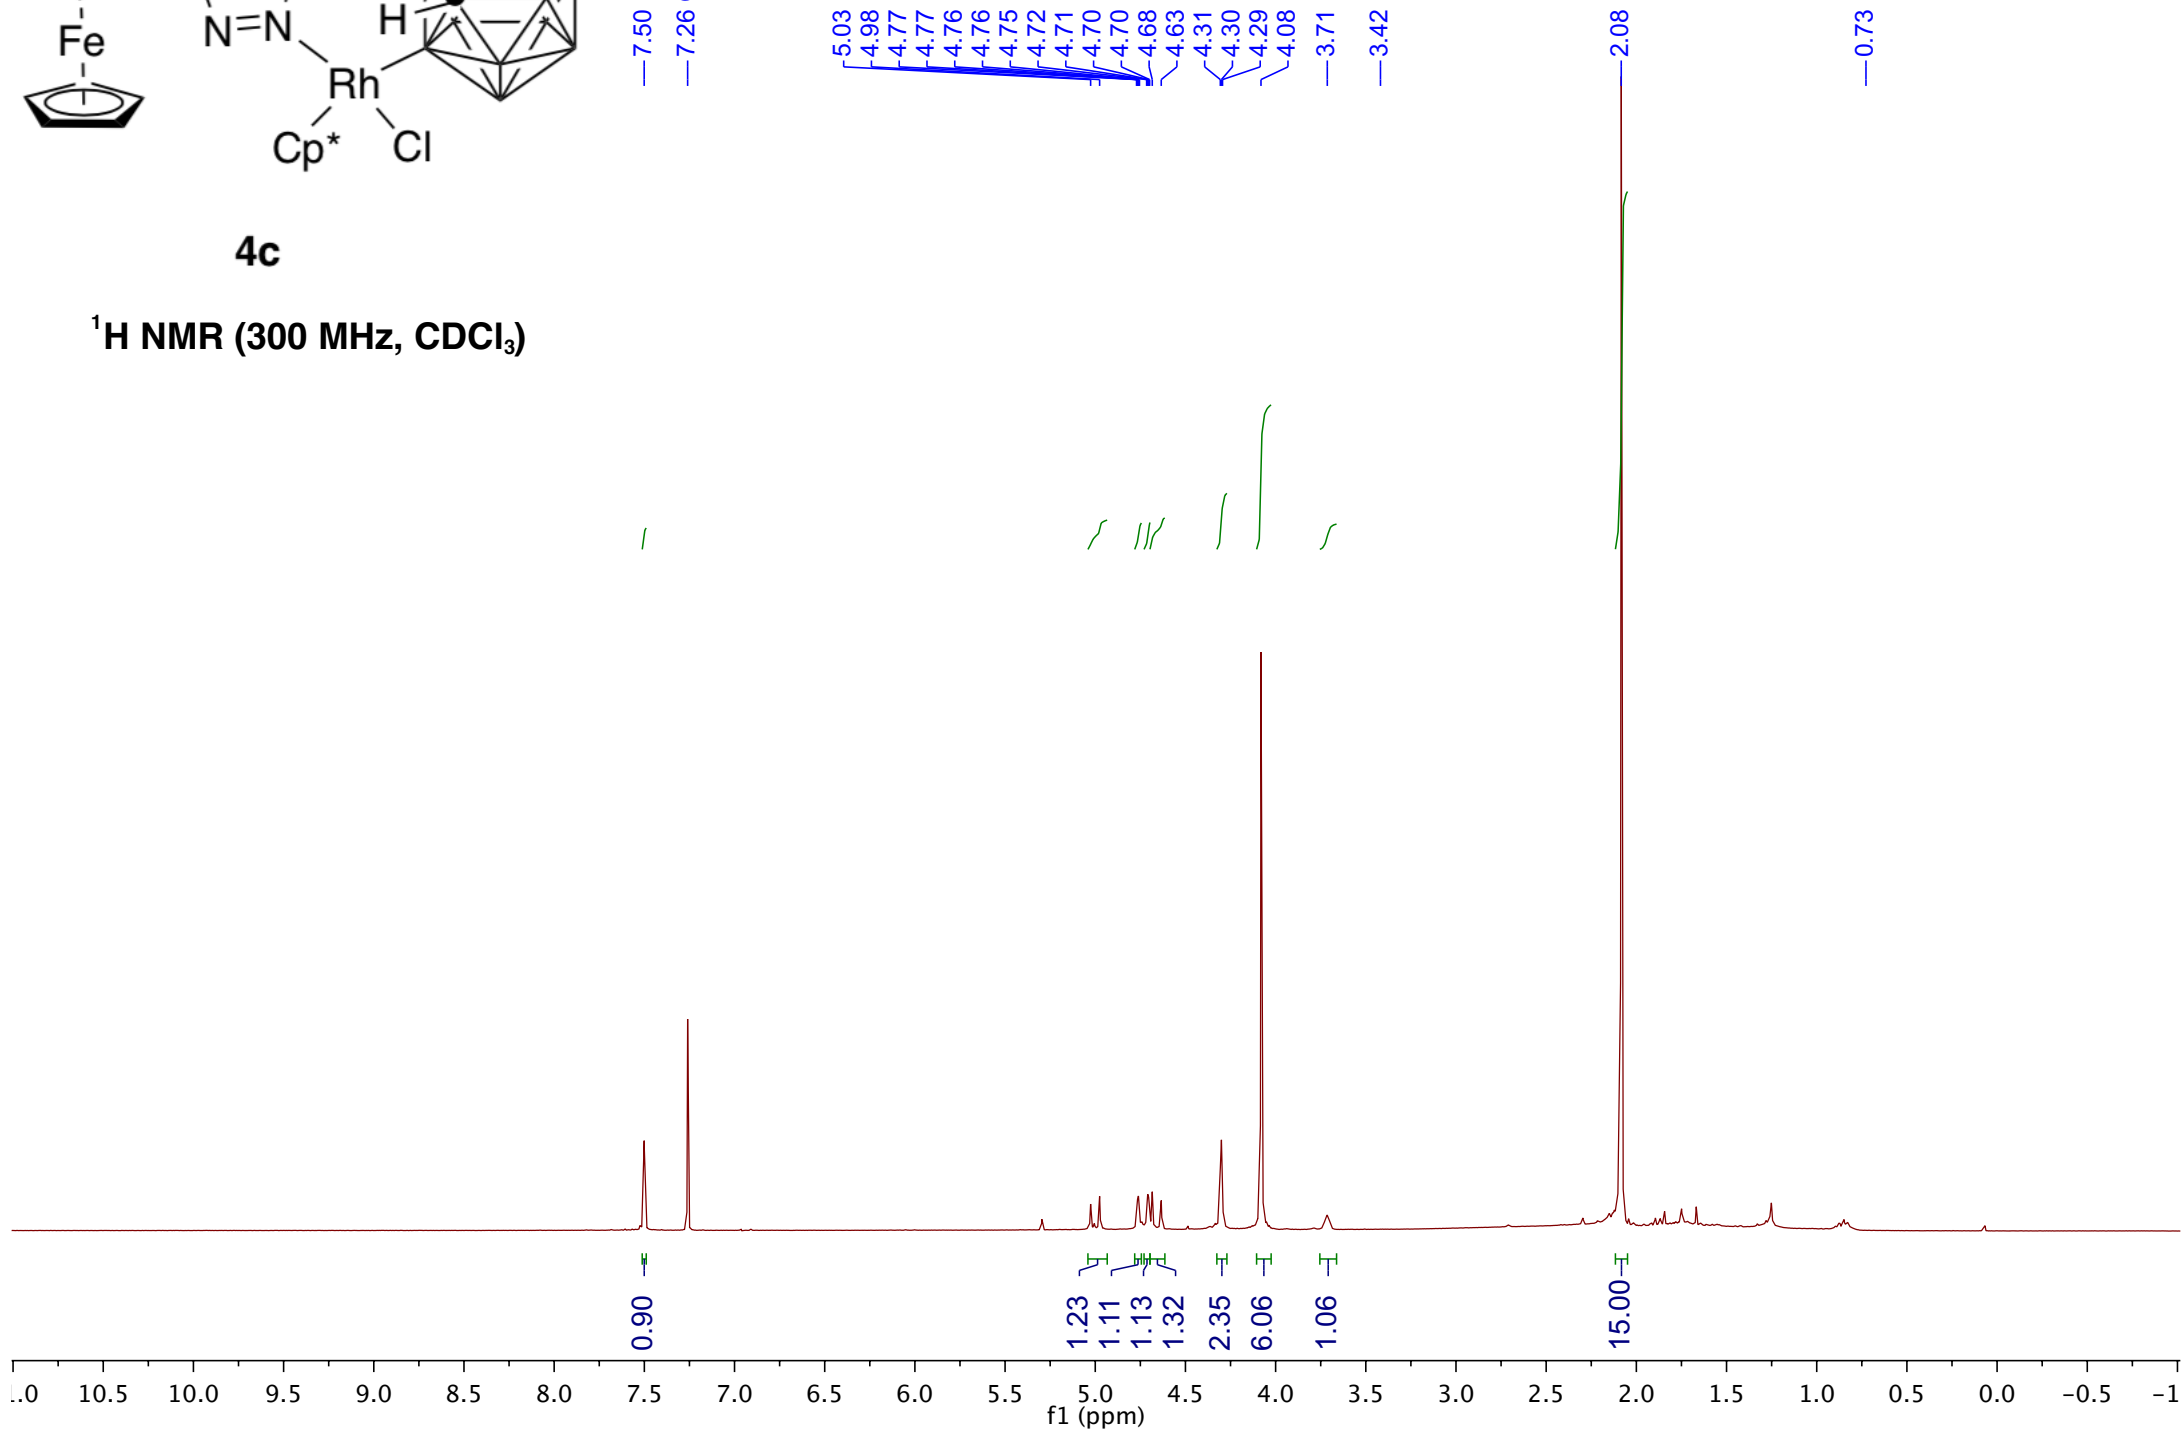



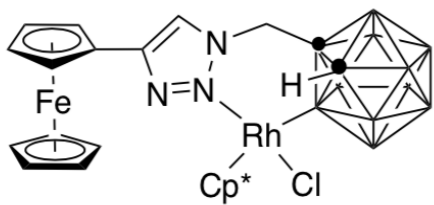

4c

$^{13}\text{C}\{^1\text{H}\}$  NMR (75 MHz,  $\text{CDCl}_3$ )

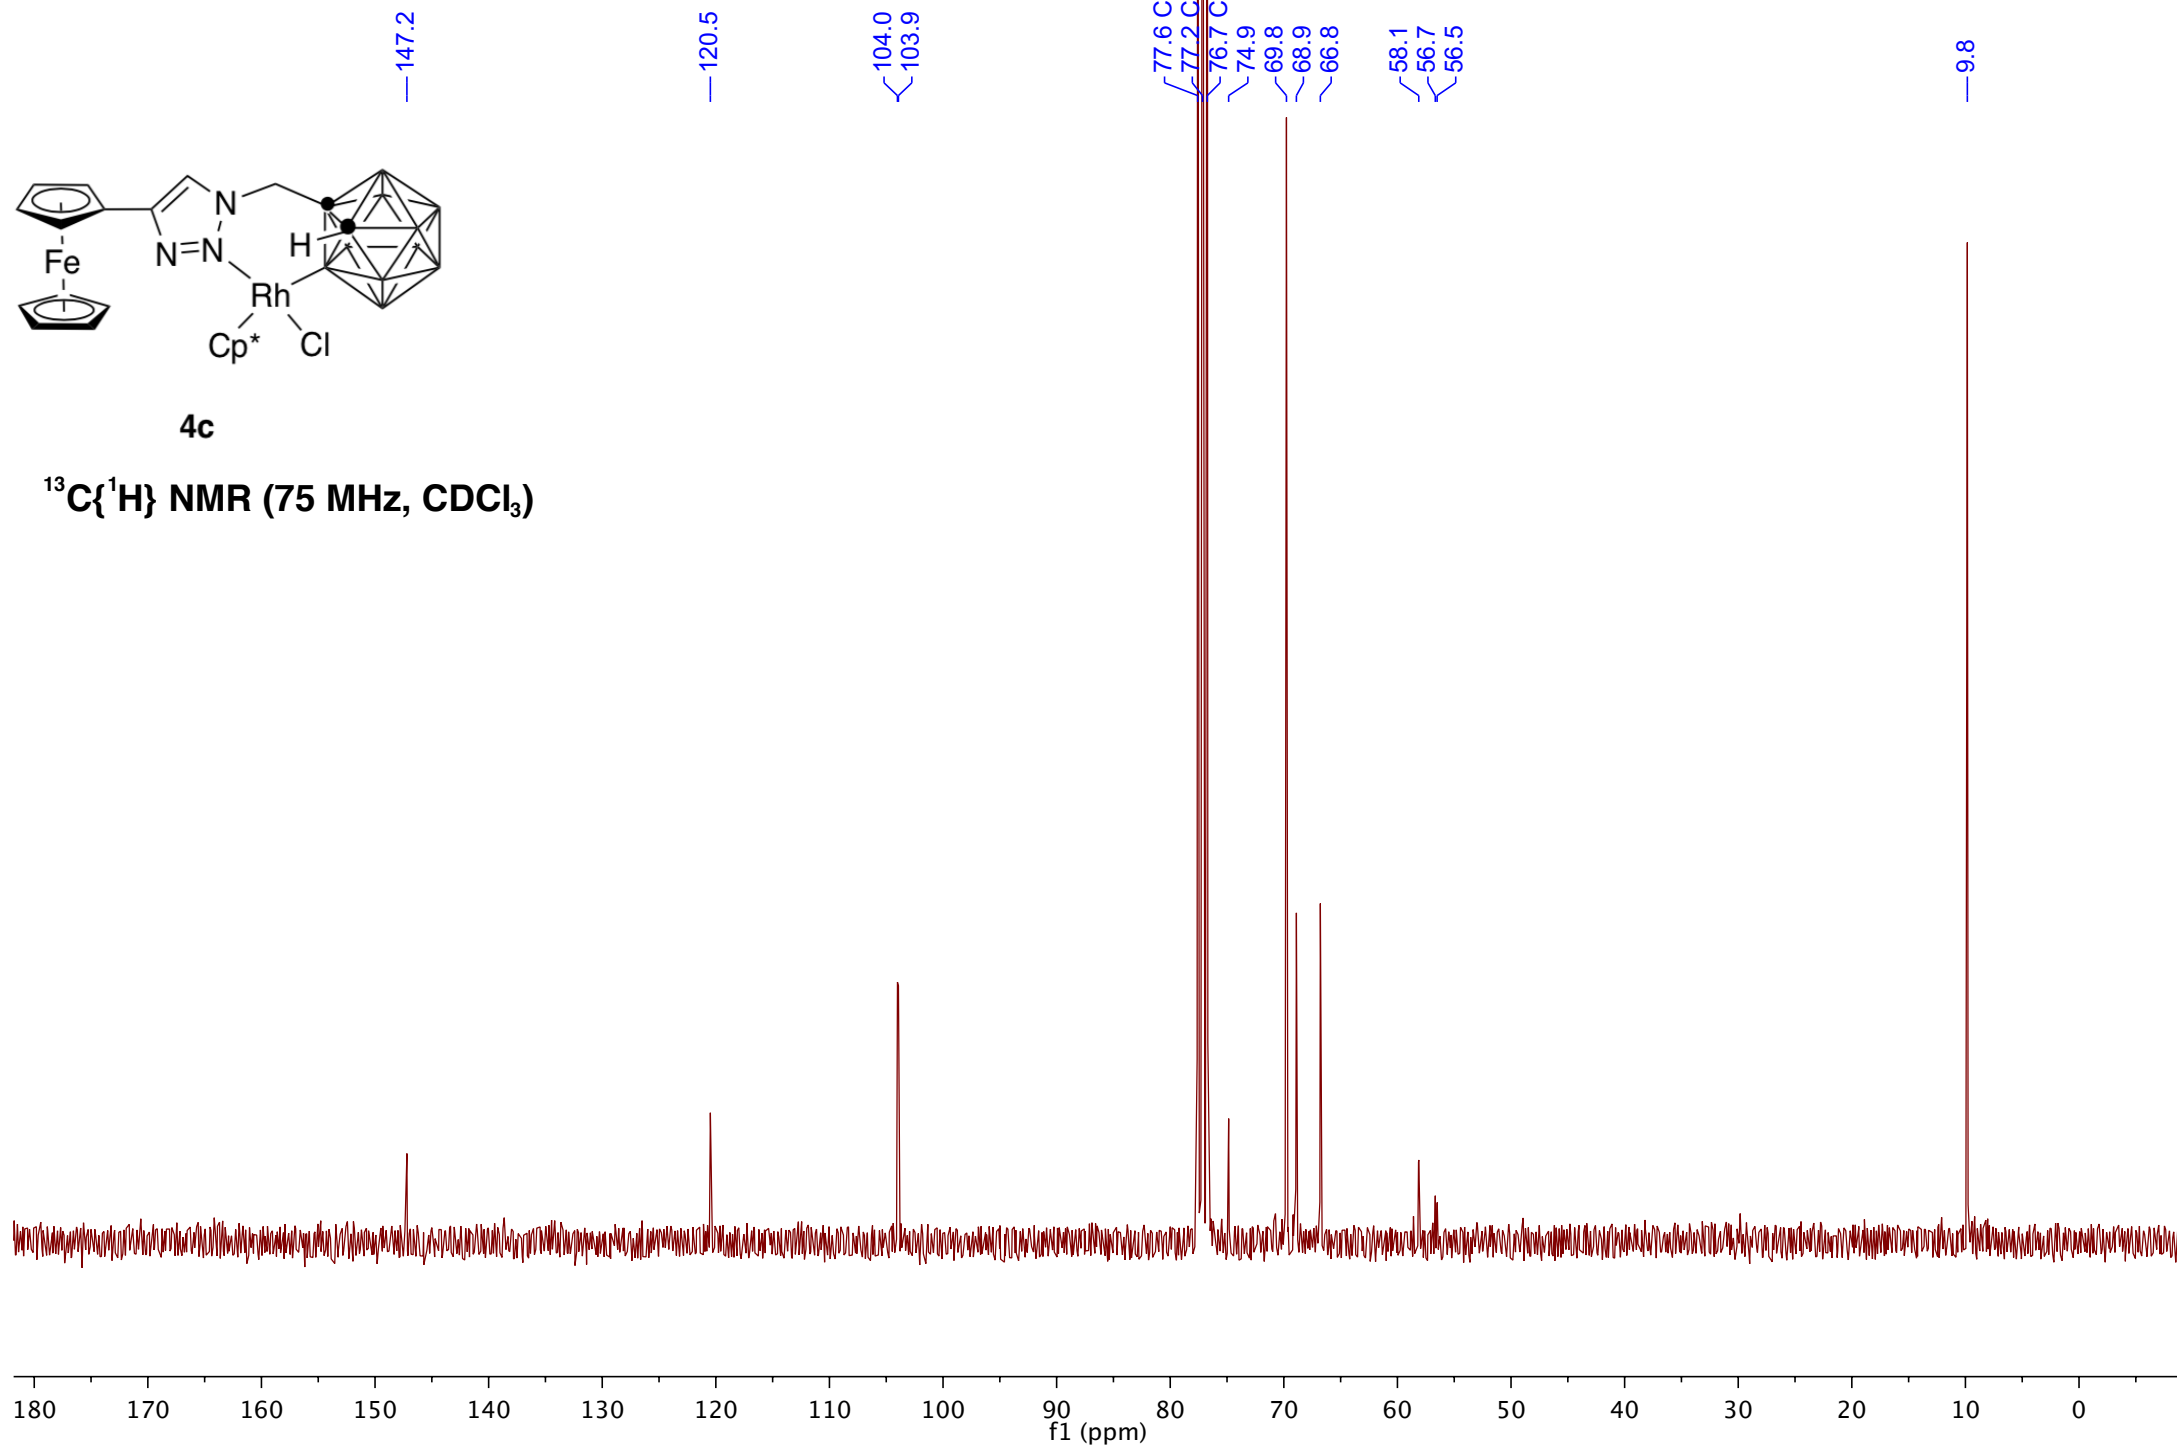

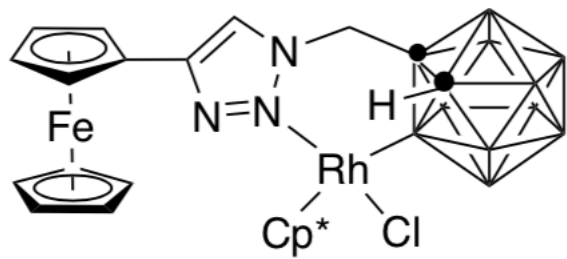

**4c**

**$^{11}\text{B}\{^1\text{H}\}$ NMR (160 MHz,  $d_6$ -acetone)**

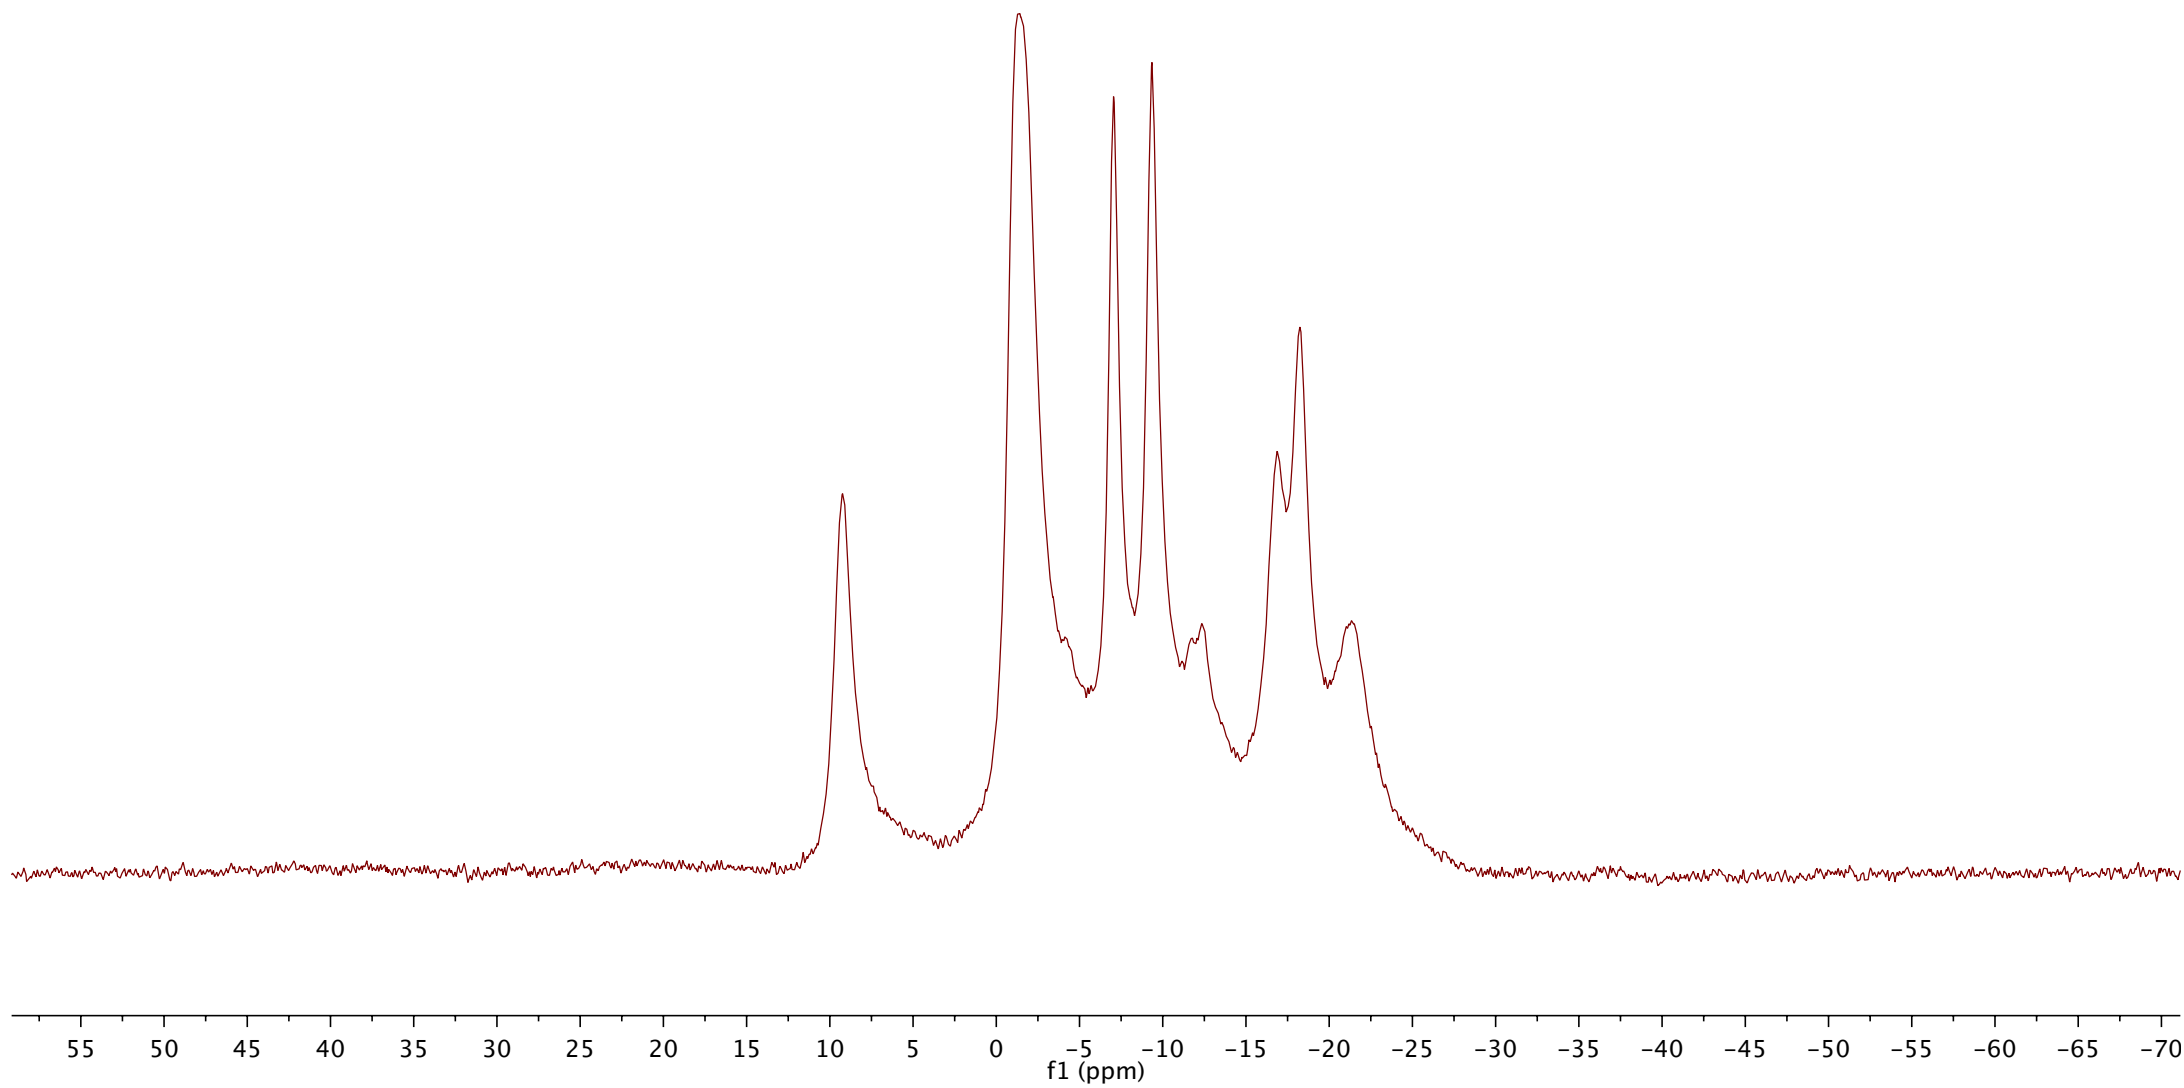

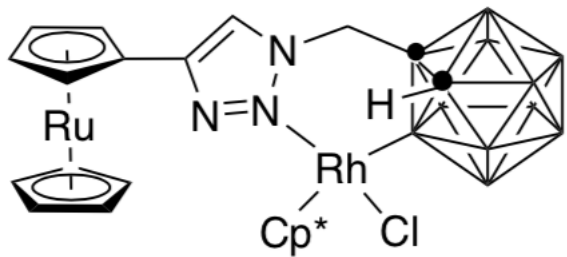

— 7.40  
— 7.26 CDCl<sub>3</sub>

5.17  
5.17  
5.16  
5.16  
5.12  
5.12  
5.11  
5.11  
5.01  
4.96  
4.67  
4.66  
4.66  
4.63  
4.58  
4.49

— 3.11

— 2.08

— 0.50

**4d**

**<sup>1</sup>H NMR (300 MHz, CDCl<sub>3</sub>)**

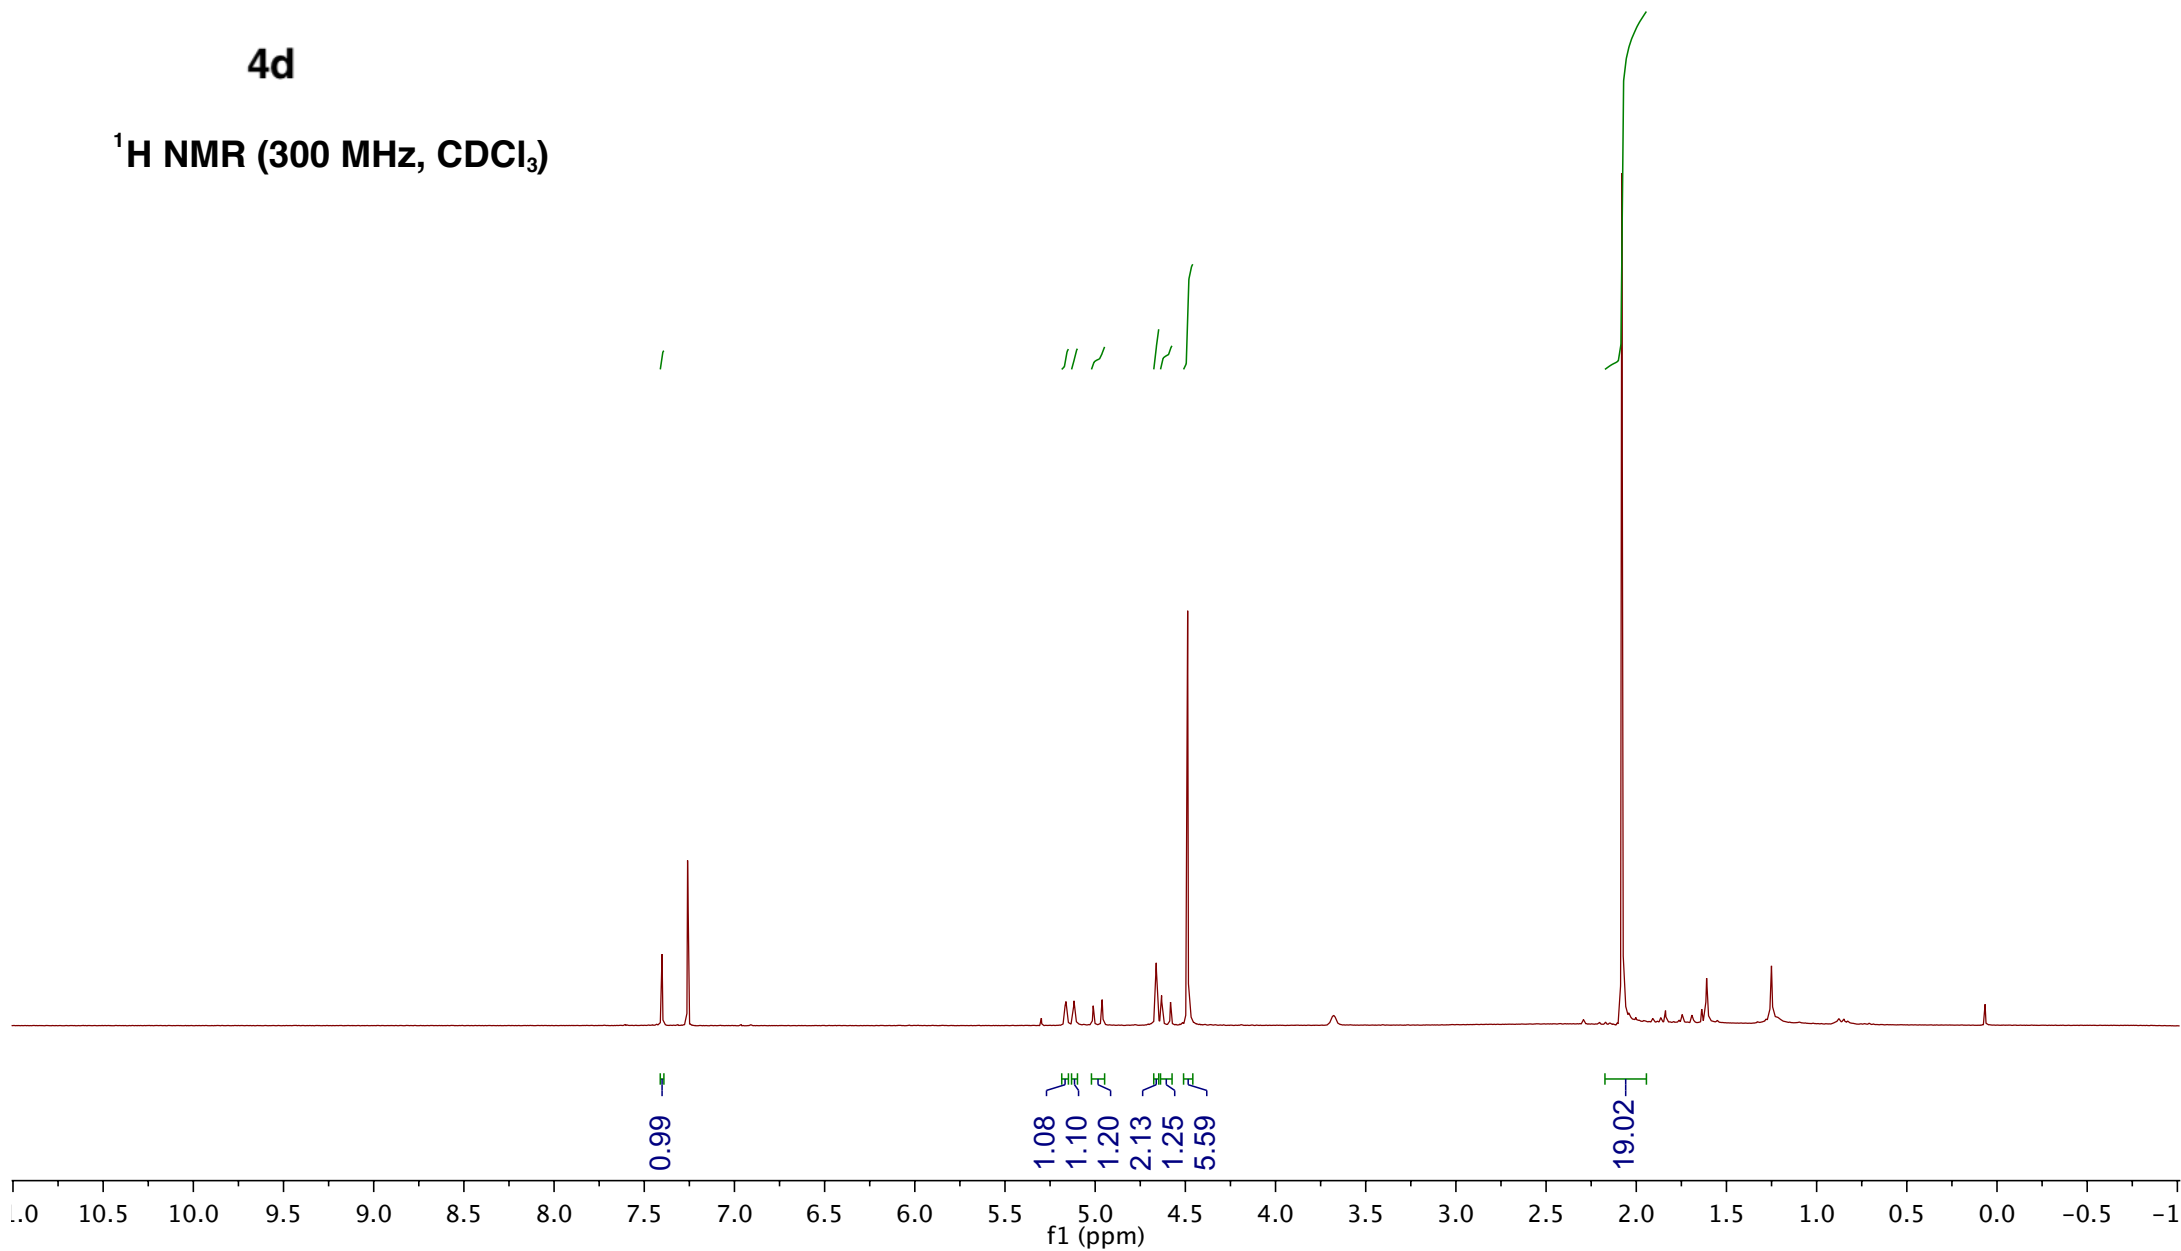

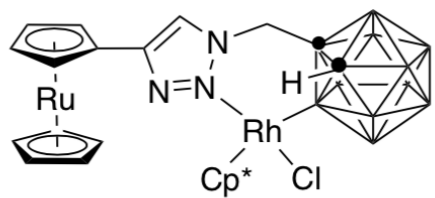

4d

$^{13}\text{C}\{^1\text{H}\}$  NMR (75 MHz,  $\text{CDCl}_3$ )

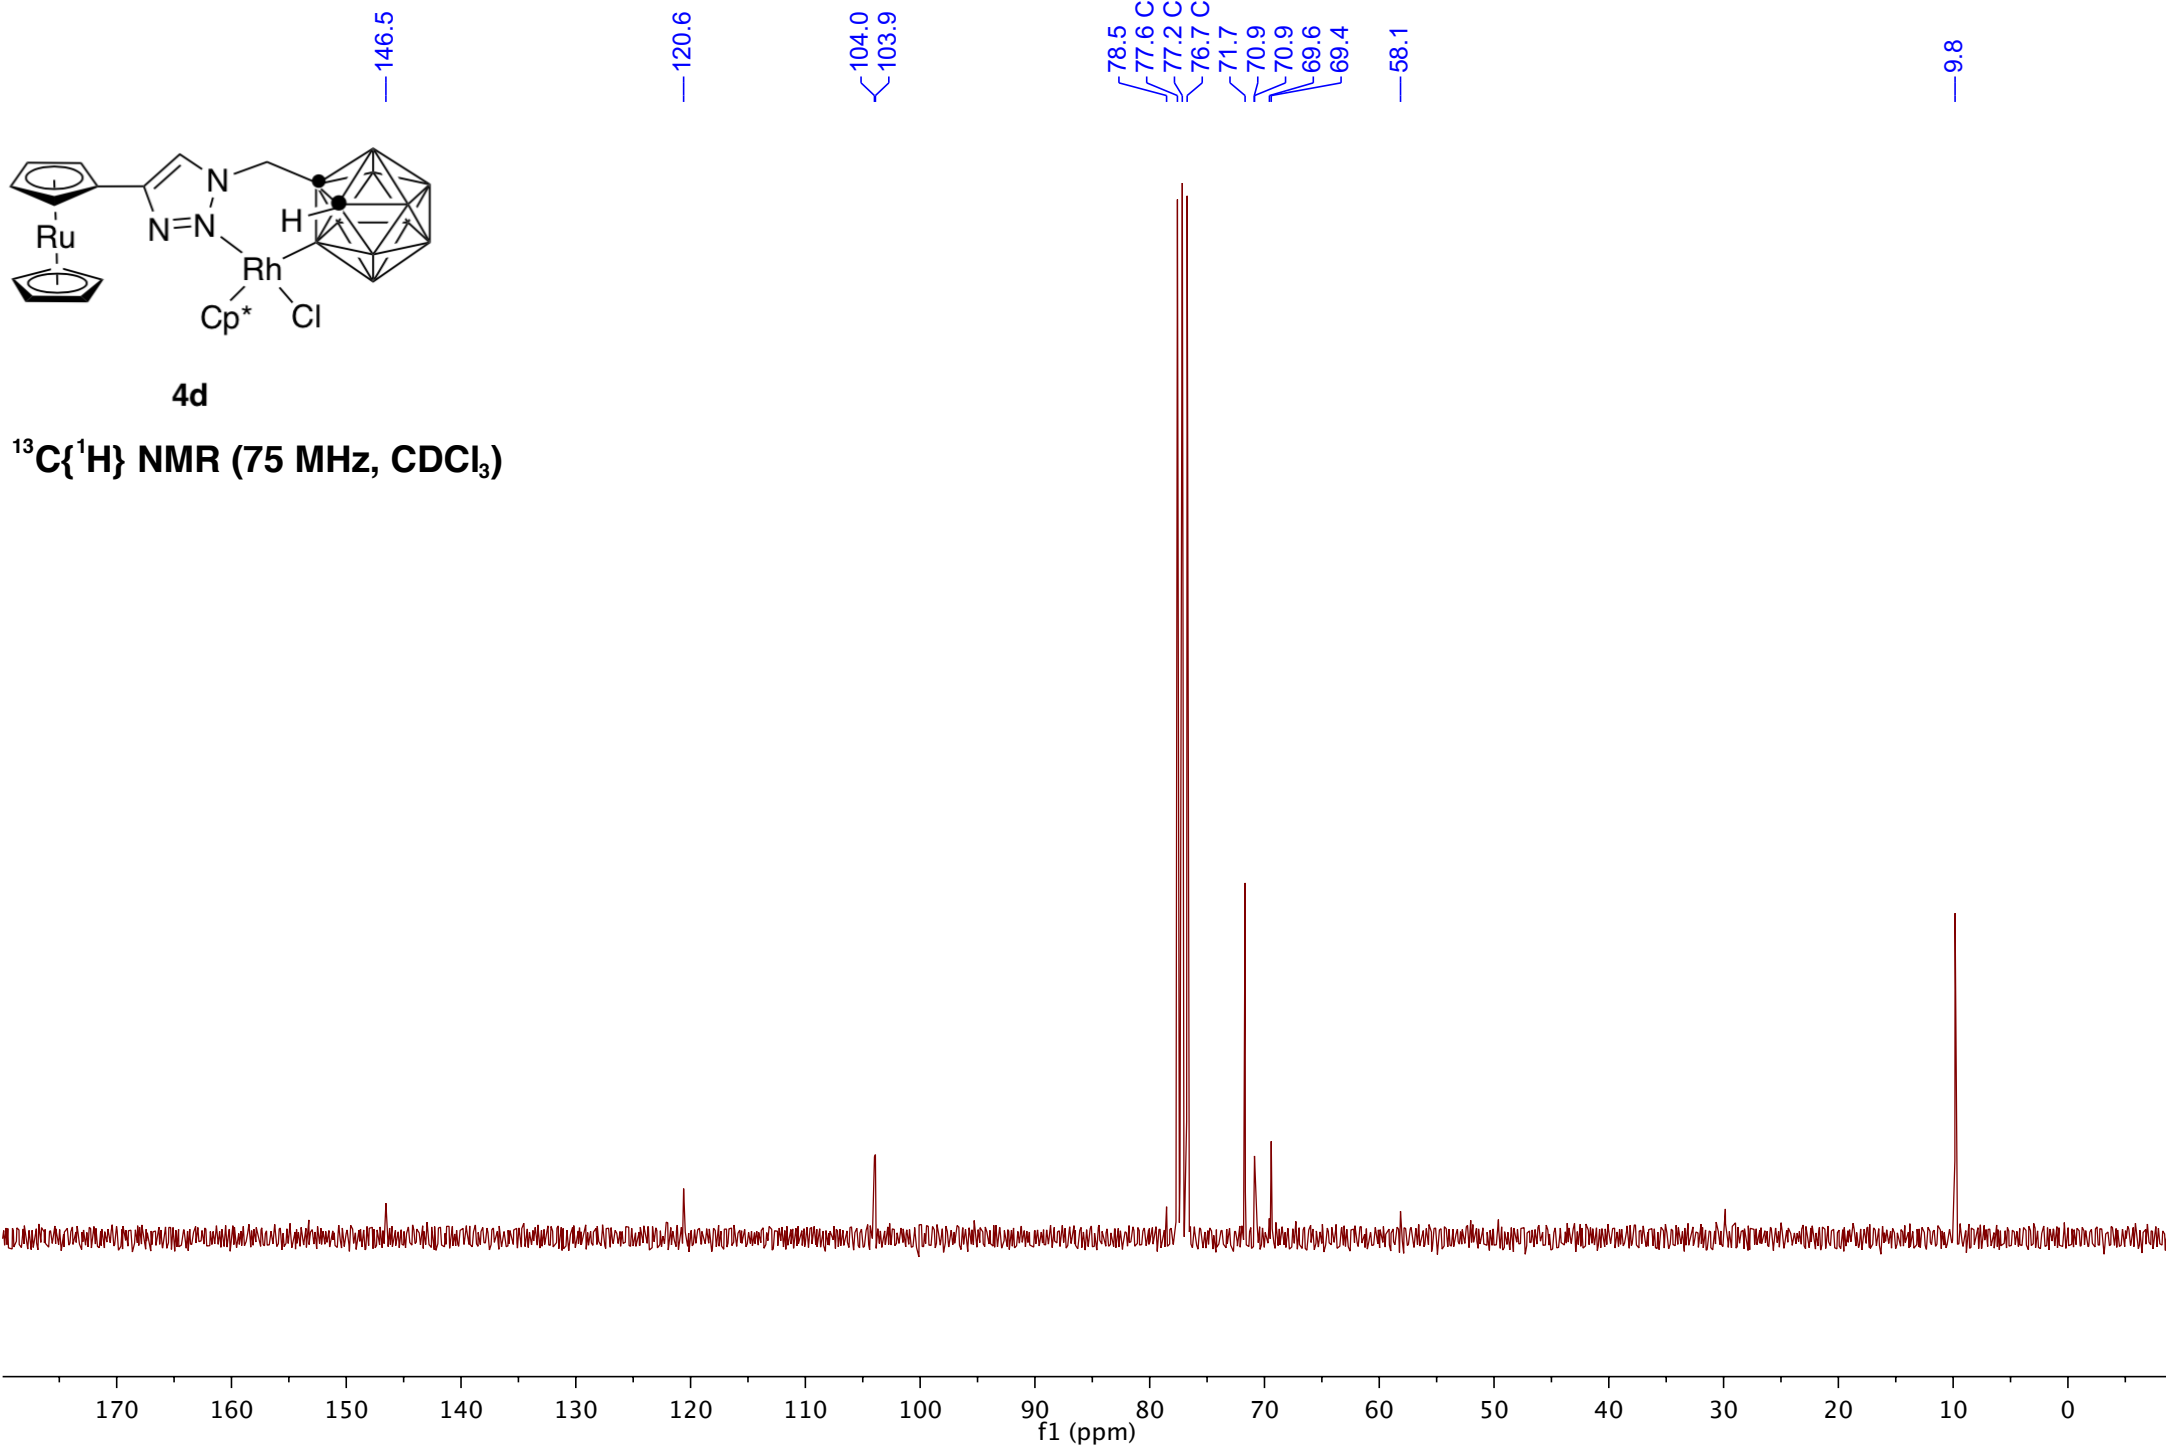

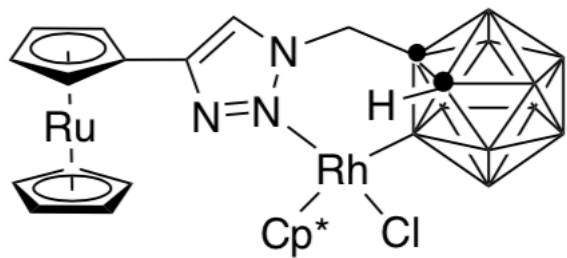

**4d**

**$^{11}\text{B}\{^1\text{H}\}$ NMR (160 MHz,  $\text{CDCl}_3$ )**

—9.2

—1.5

—7.1

—9.4

—17.0

—18.3

—21.5

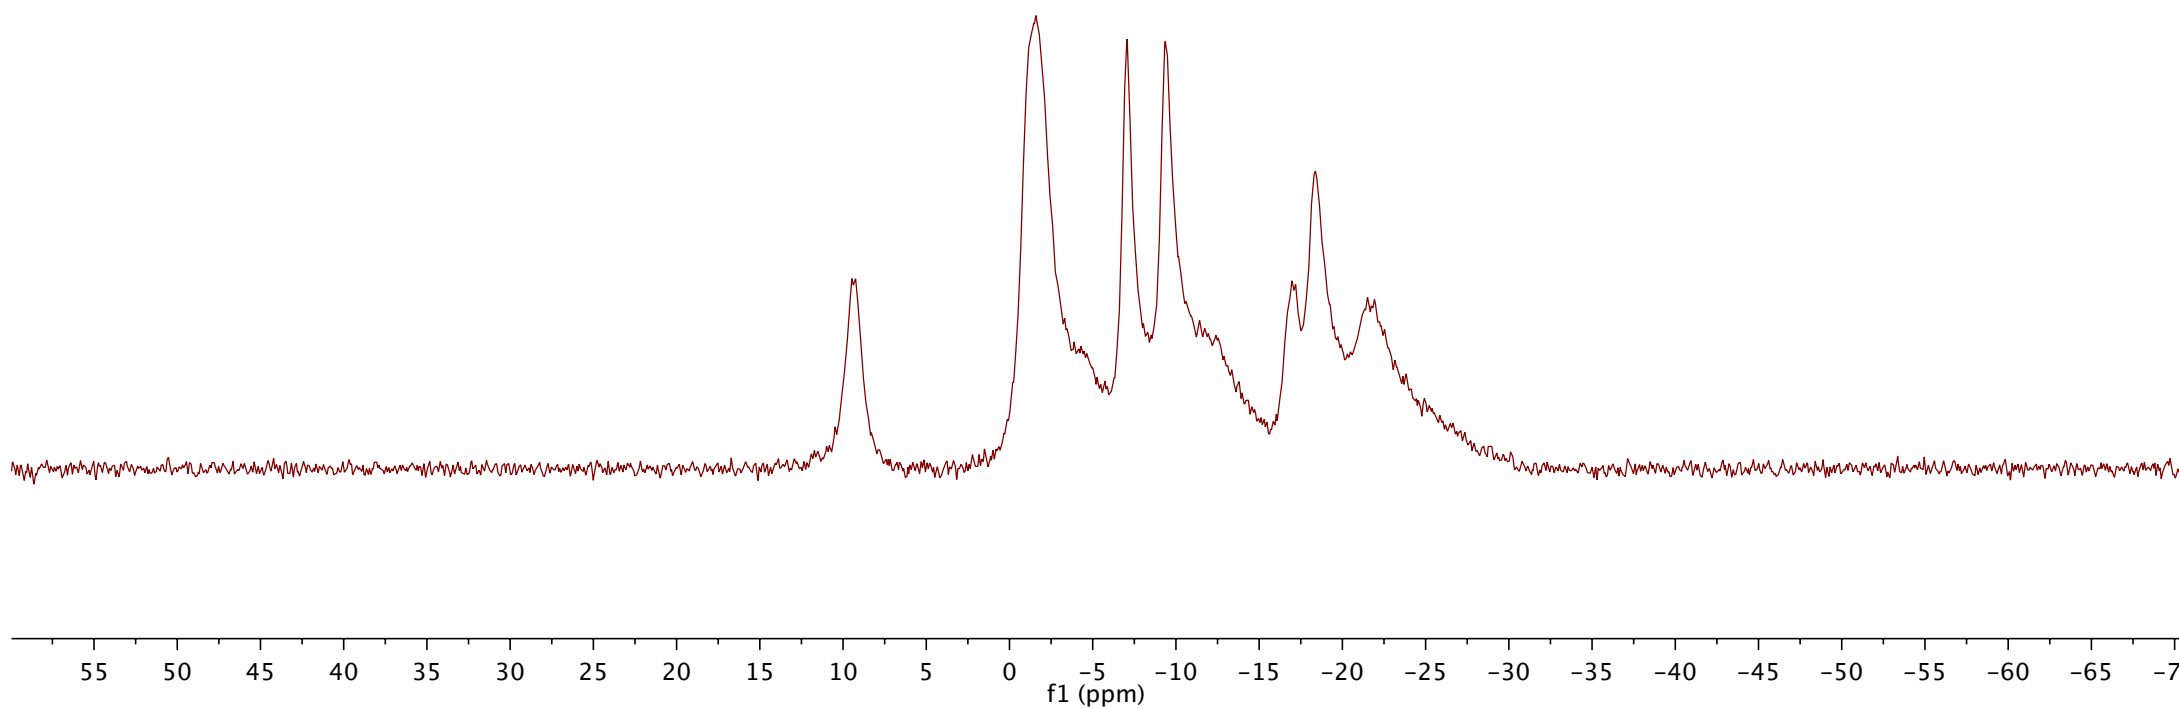

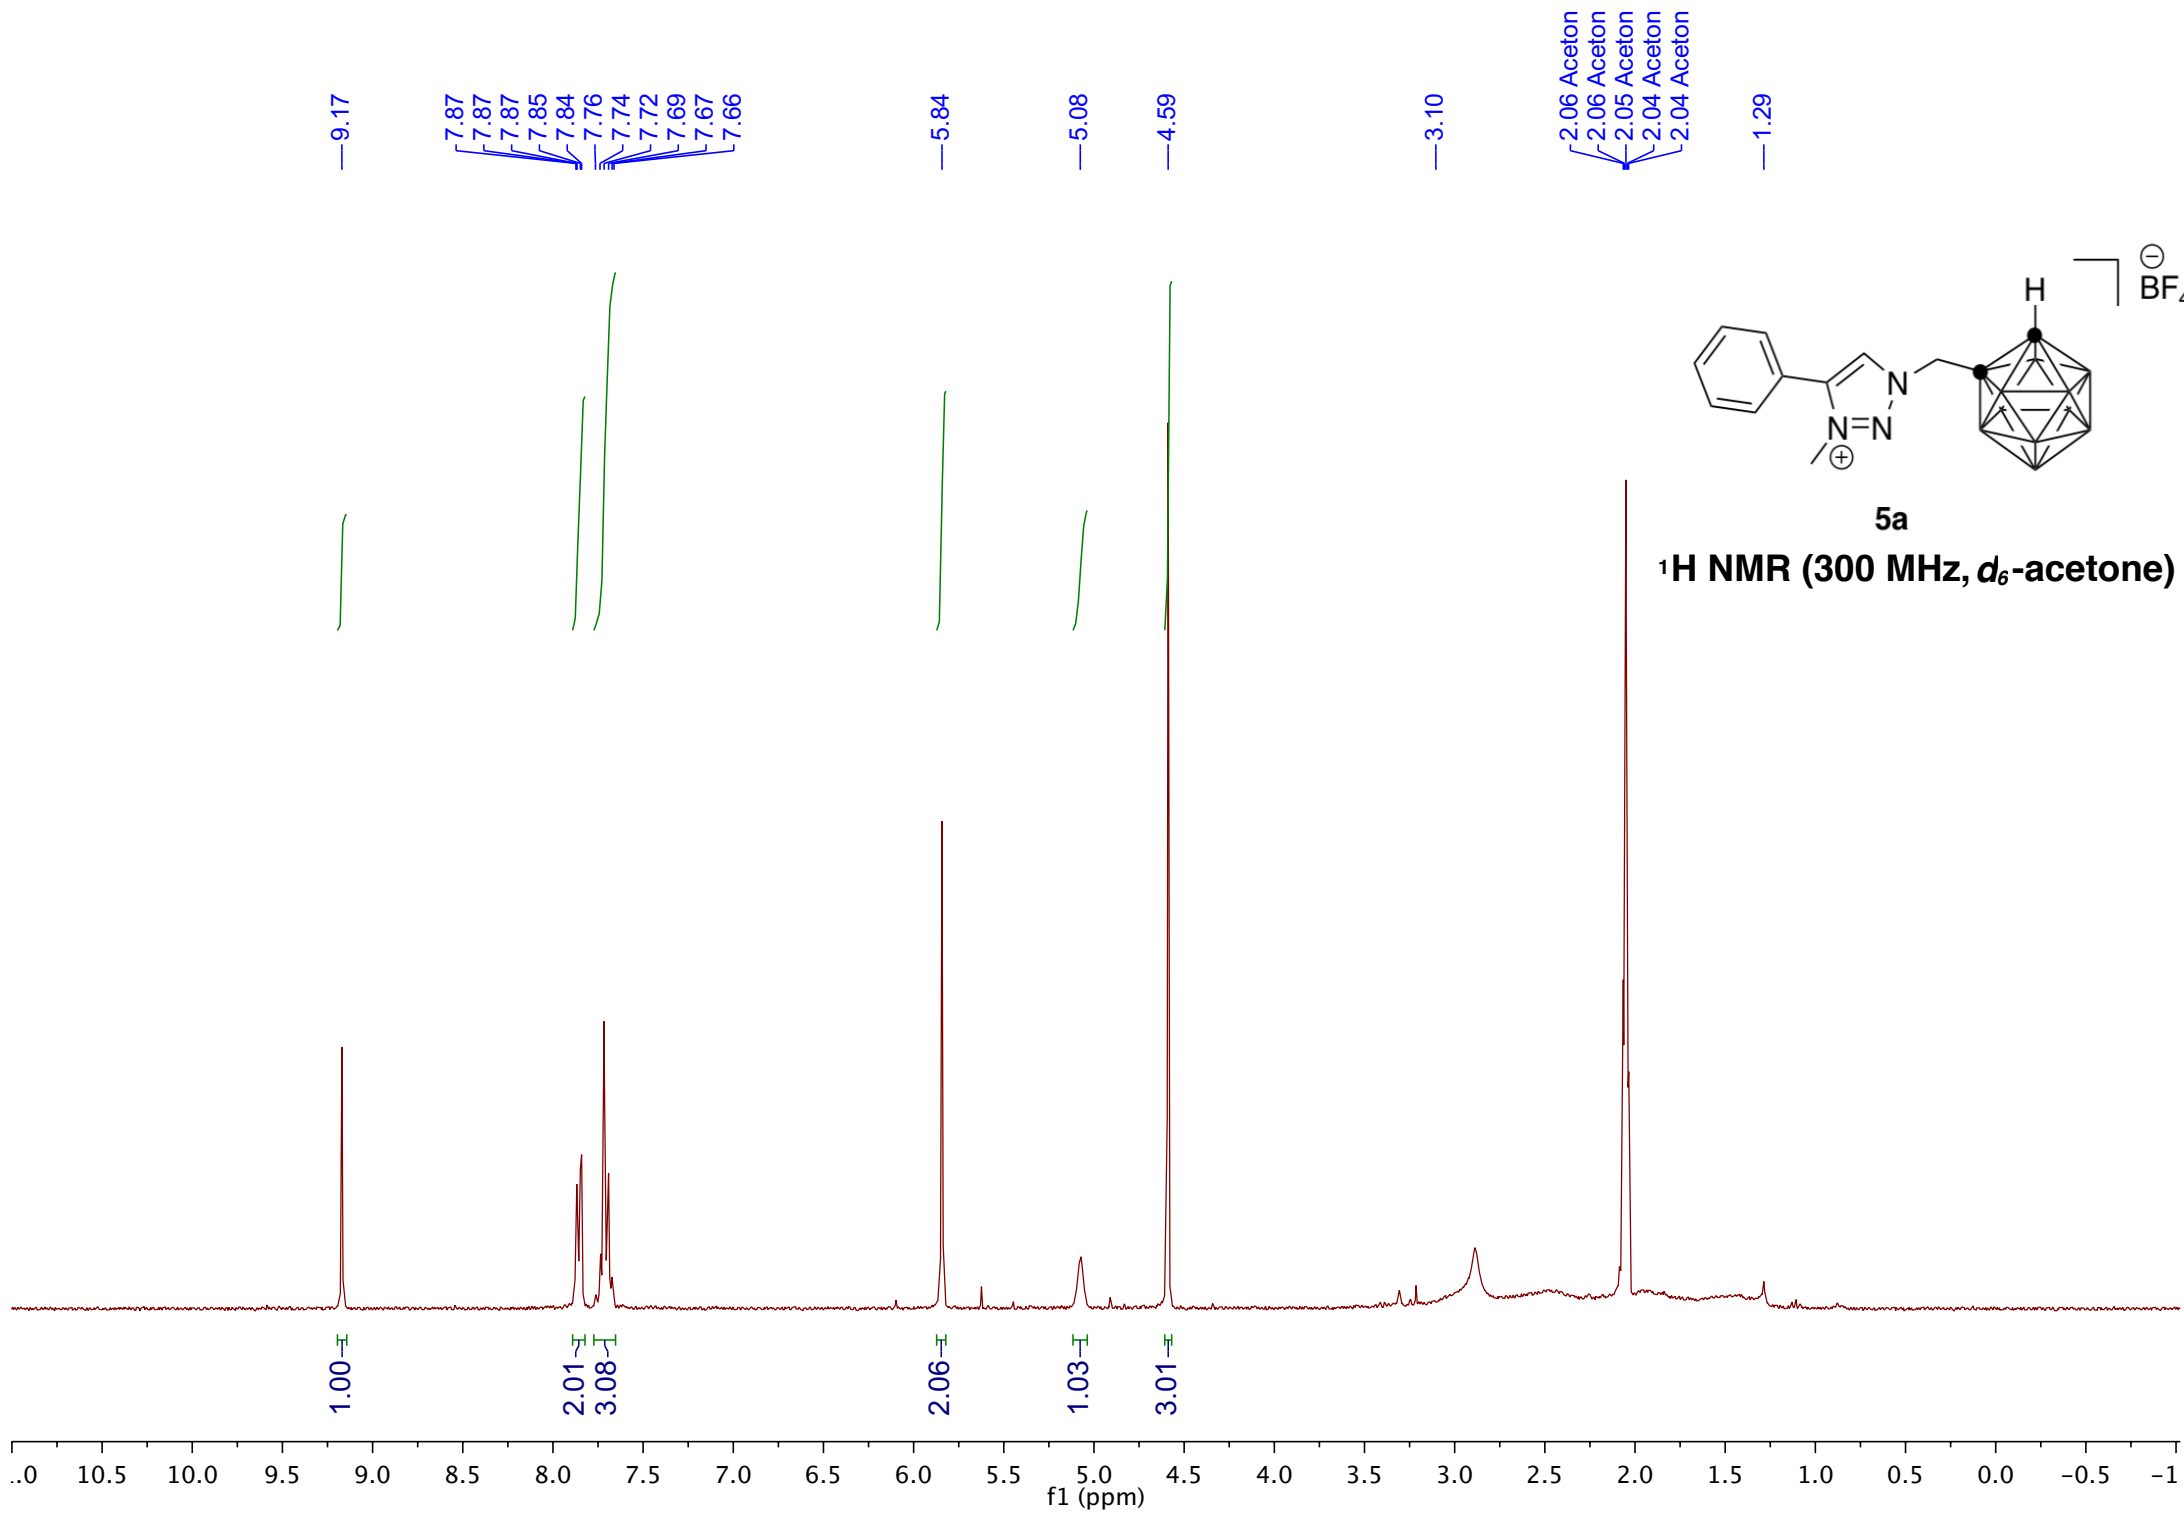

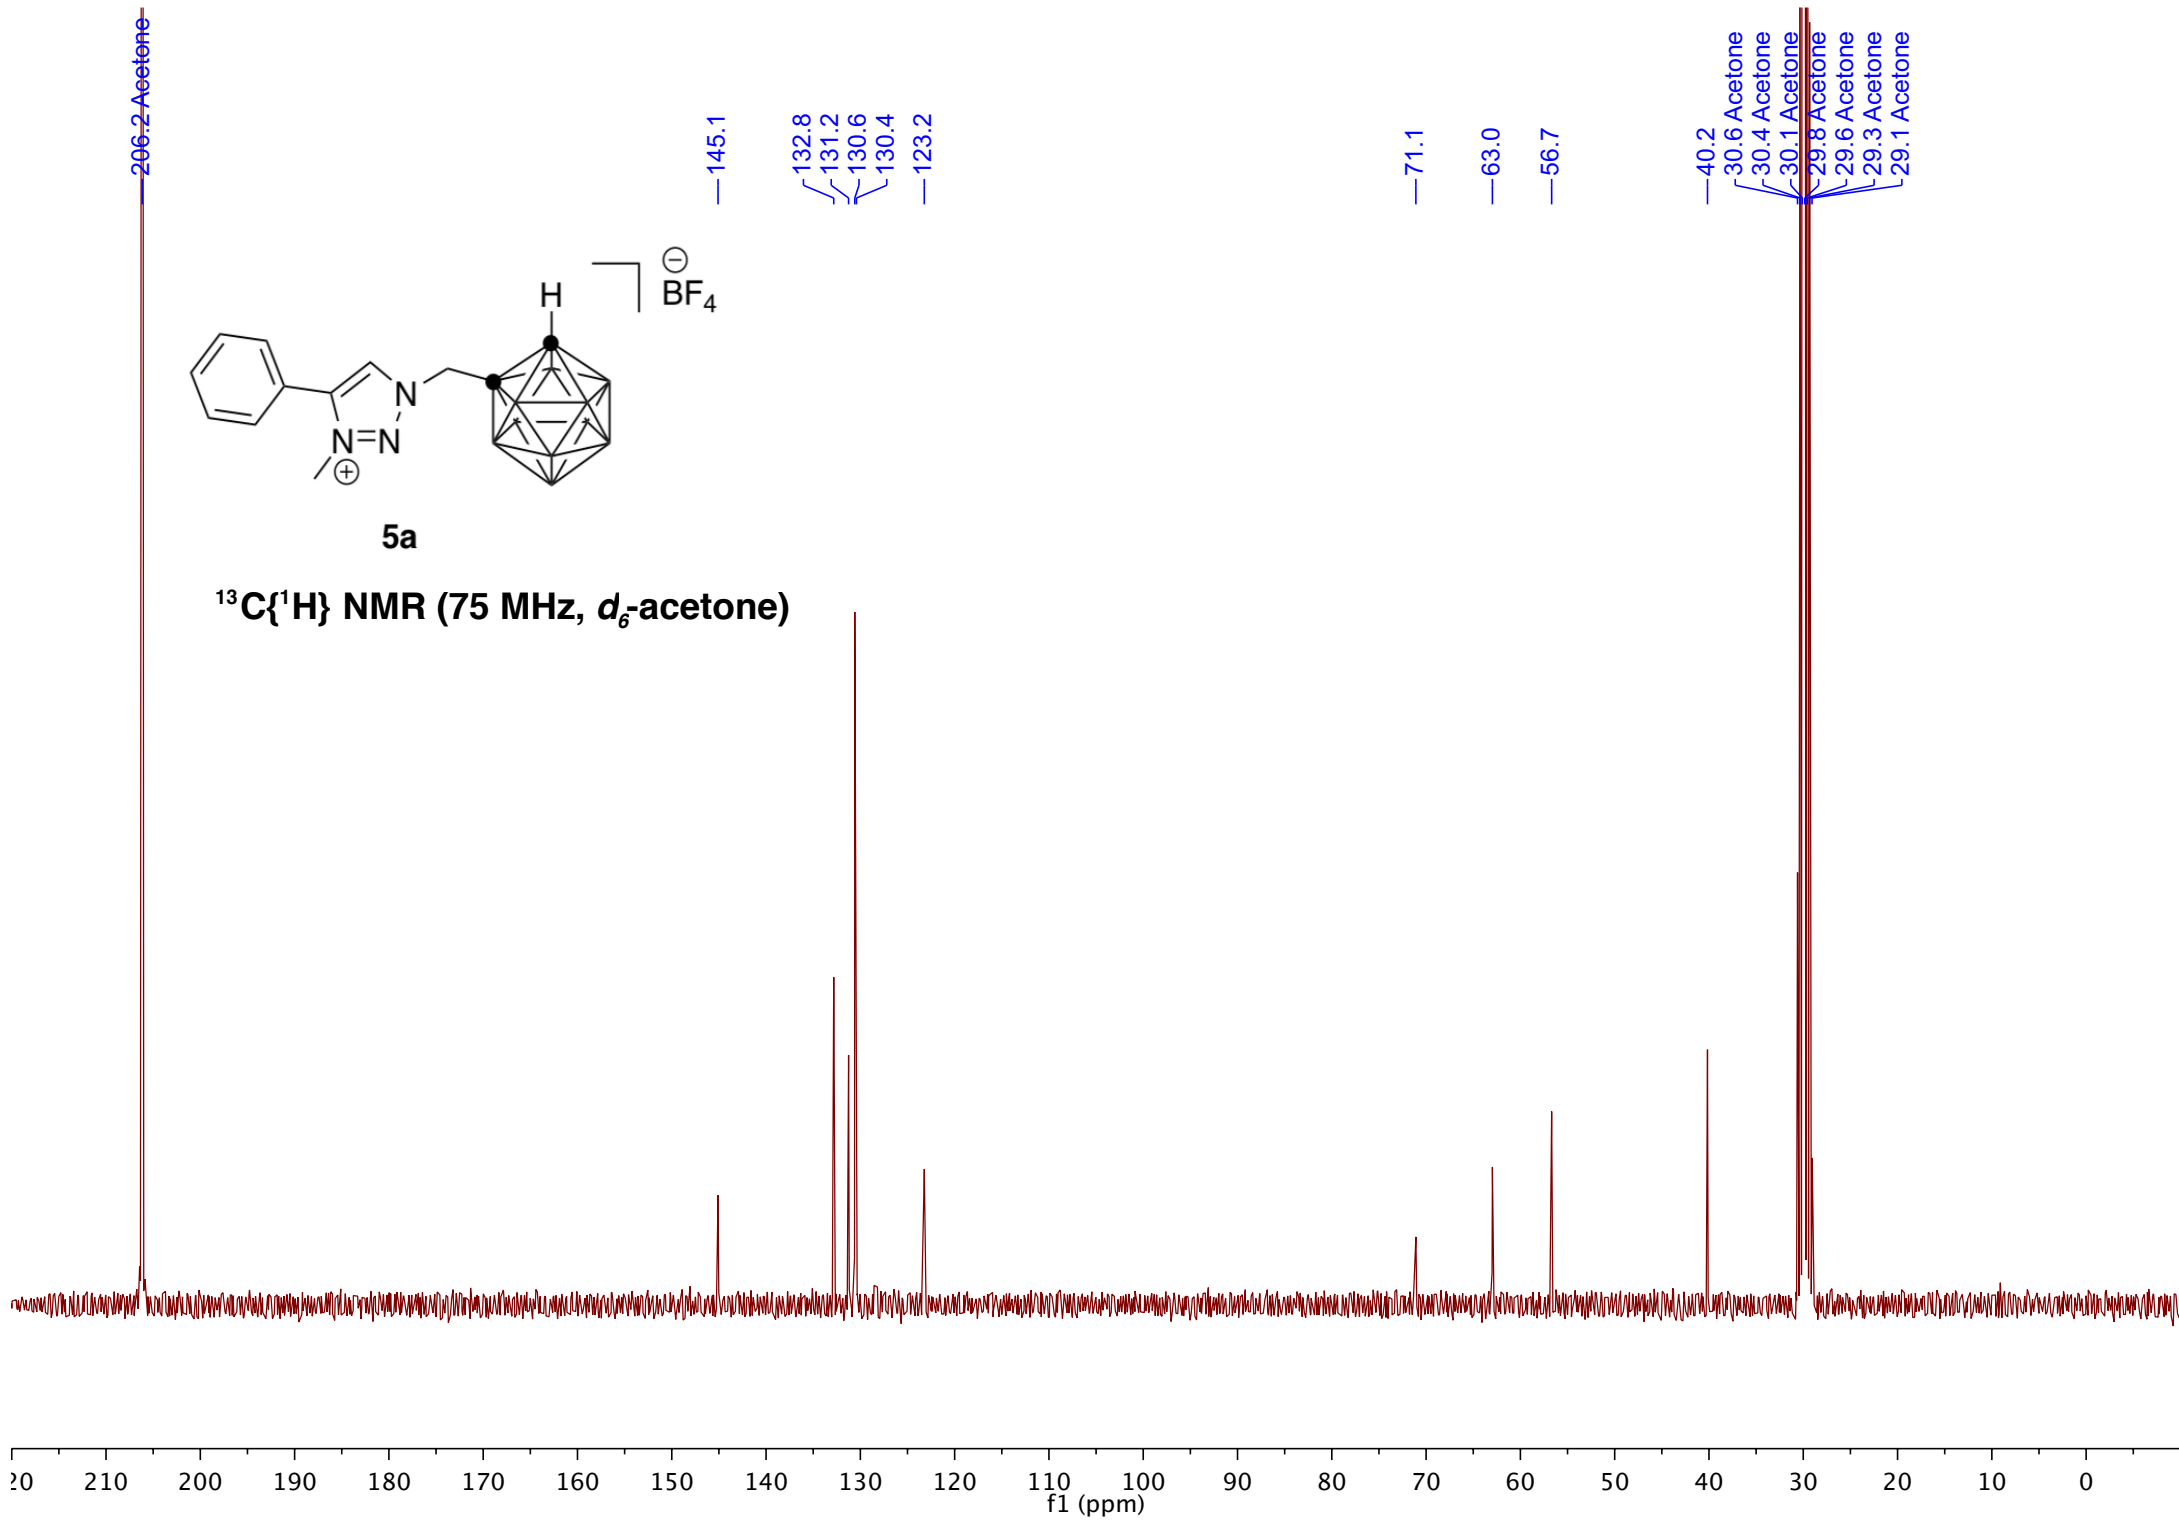

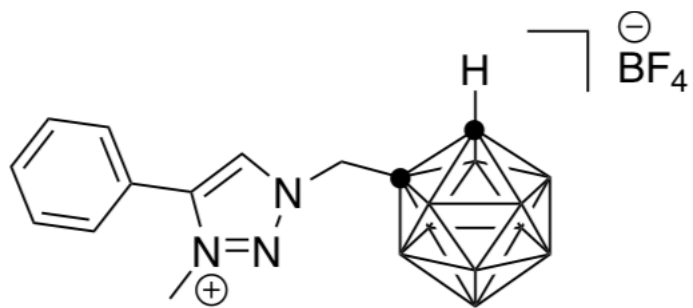

**5a**

$^{11}\text{B}\{^1\text{H}\}$  NMR (160 MHz,  $d_6$ -acetone)

0.6  
1.0  
2.2  
4.2  
9.0  
11.6  
12.5

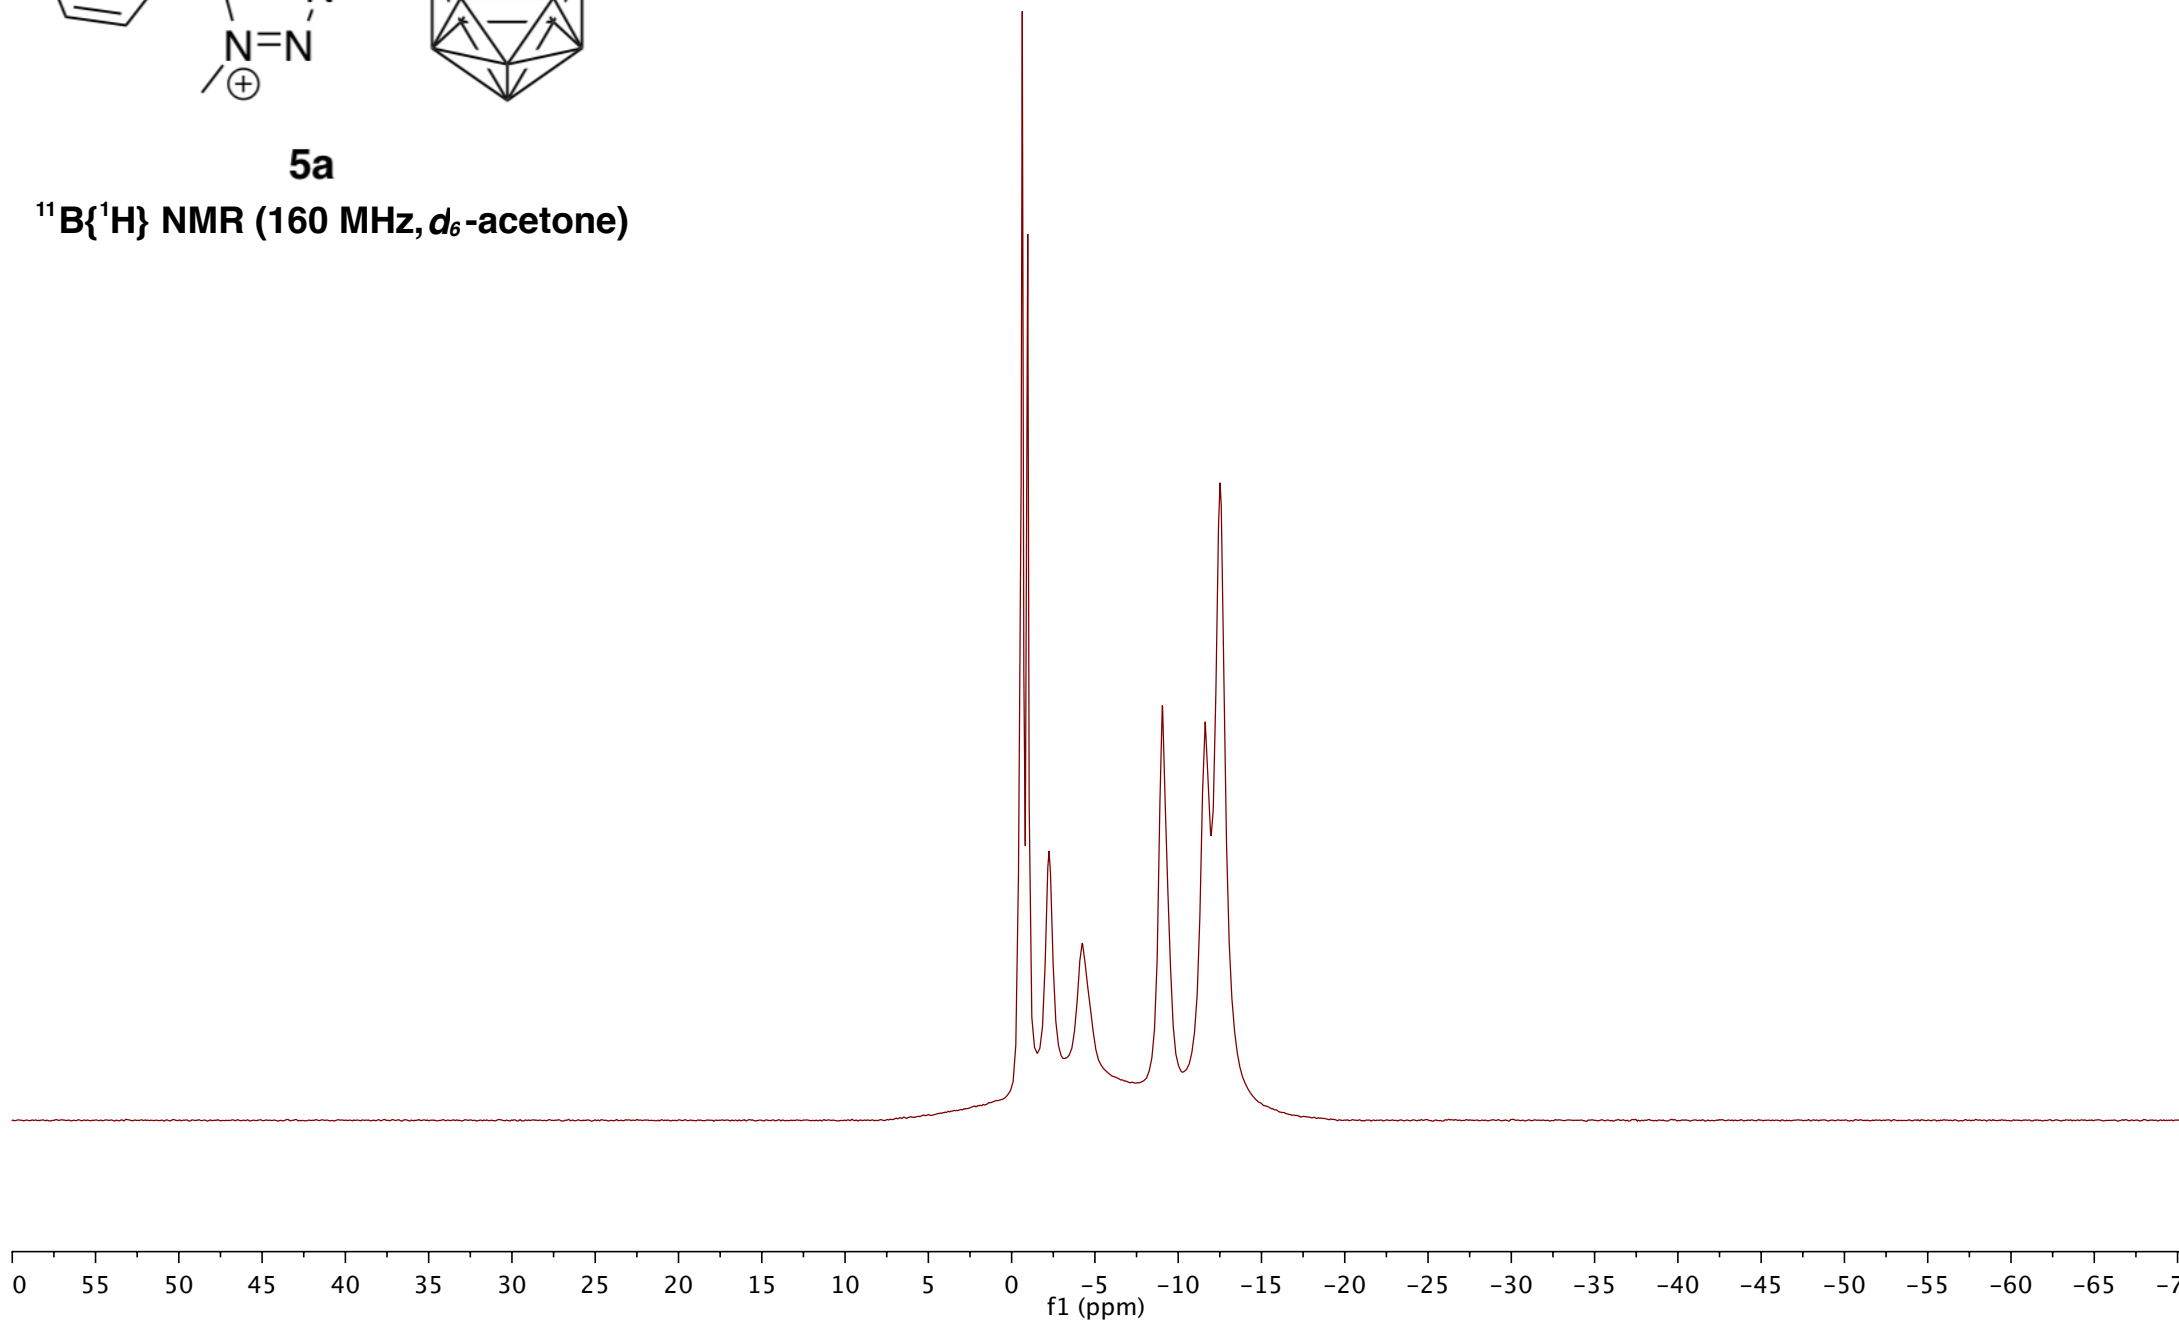



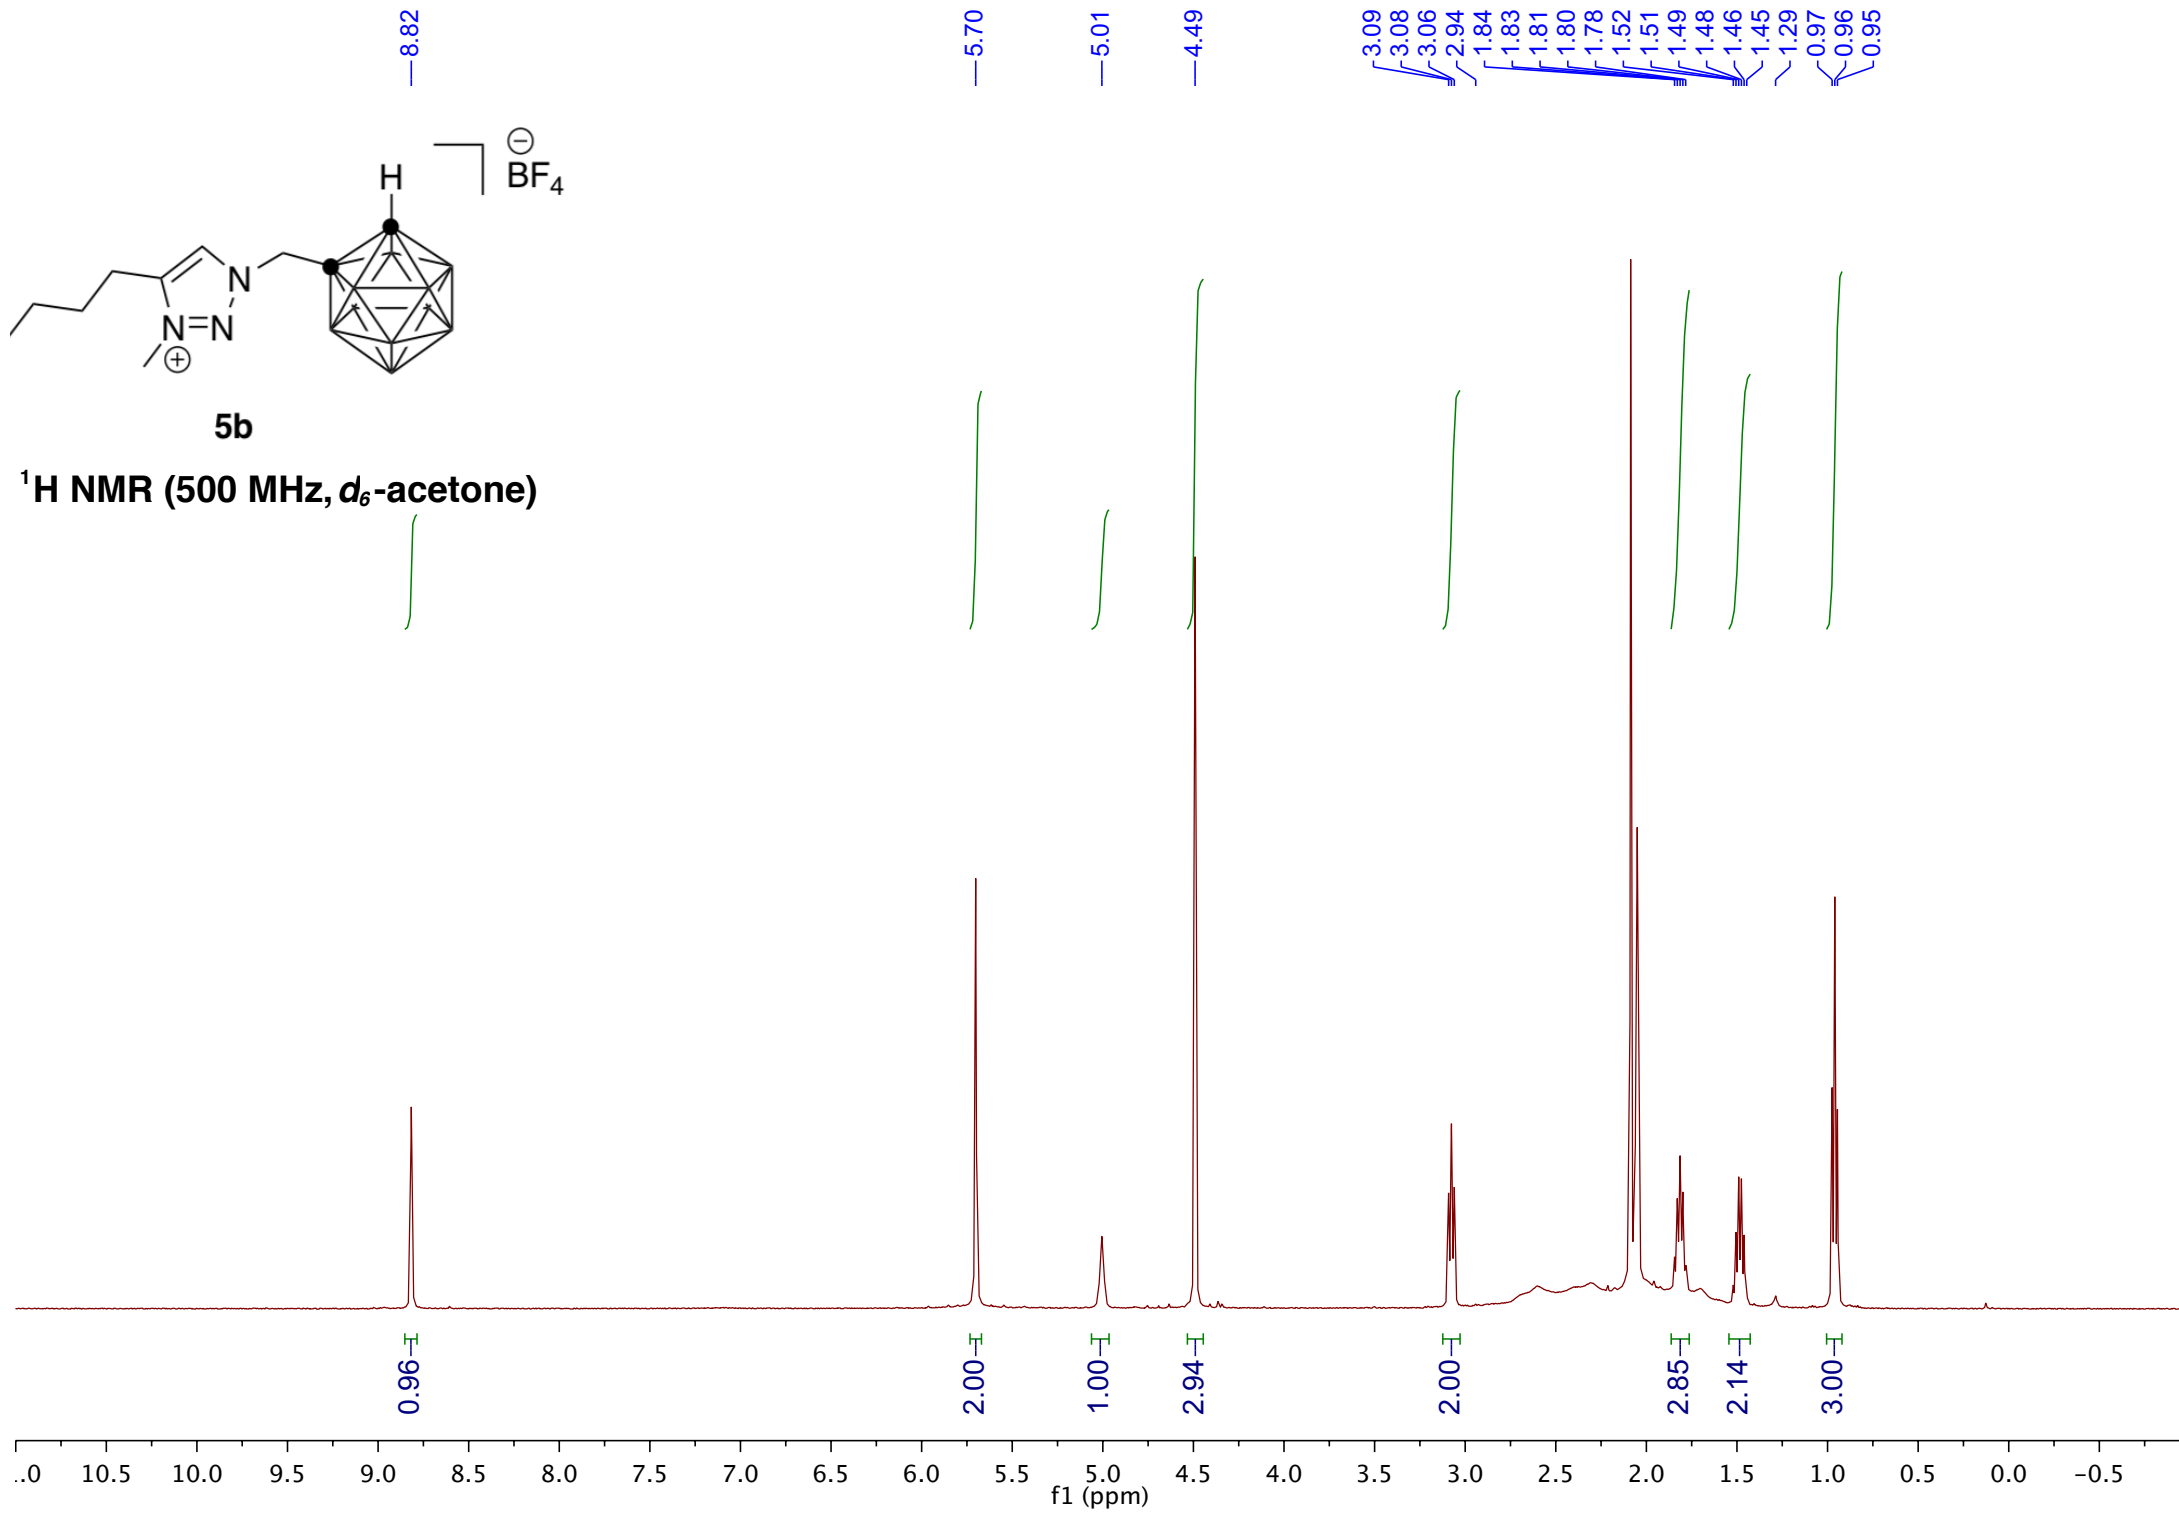

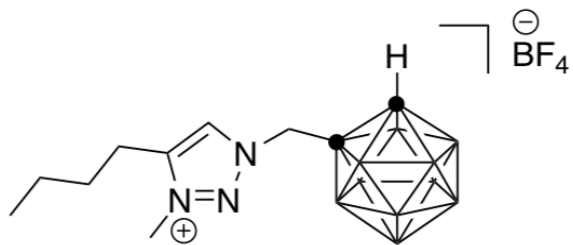

5b

$^{13}\text{C}\{^1\text{H}\}$  NMR (75 MHz,  $d_6$ -acetone)

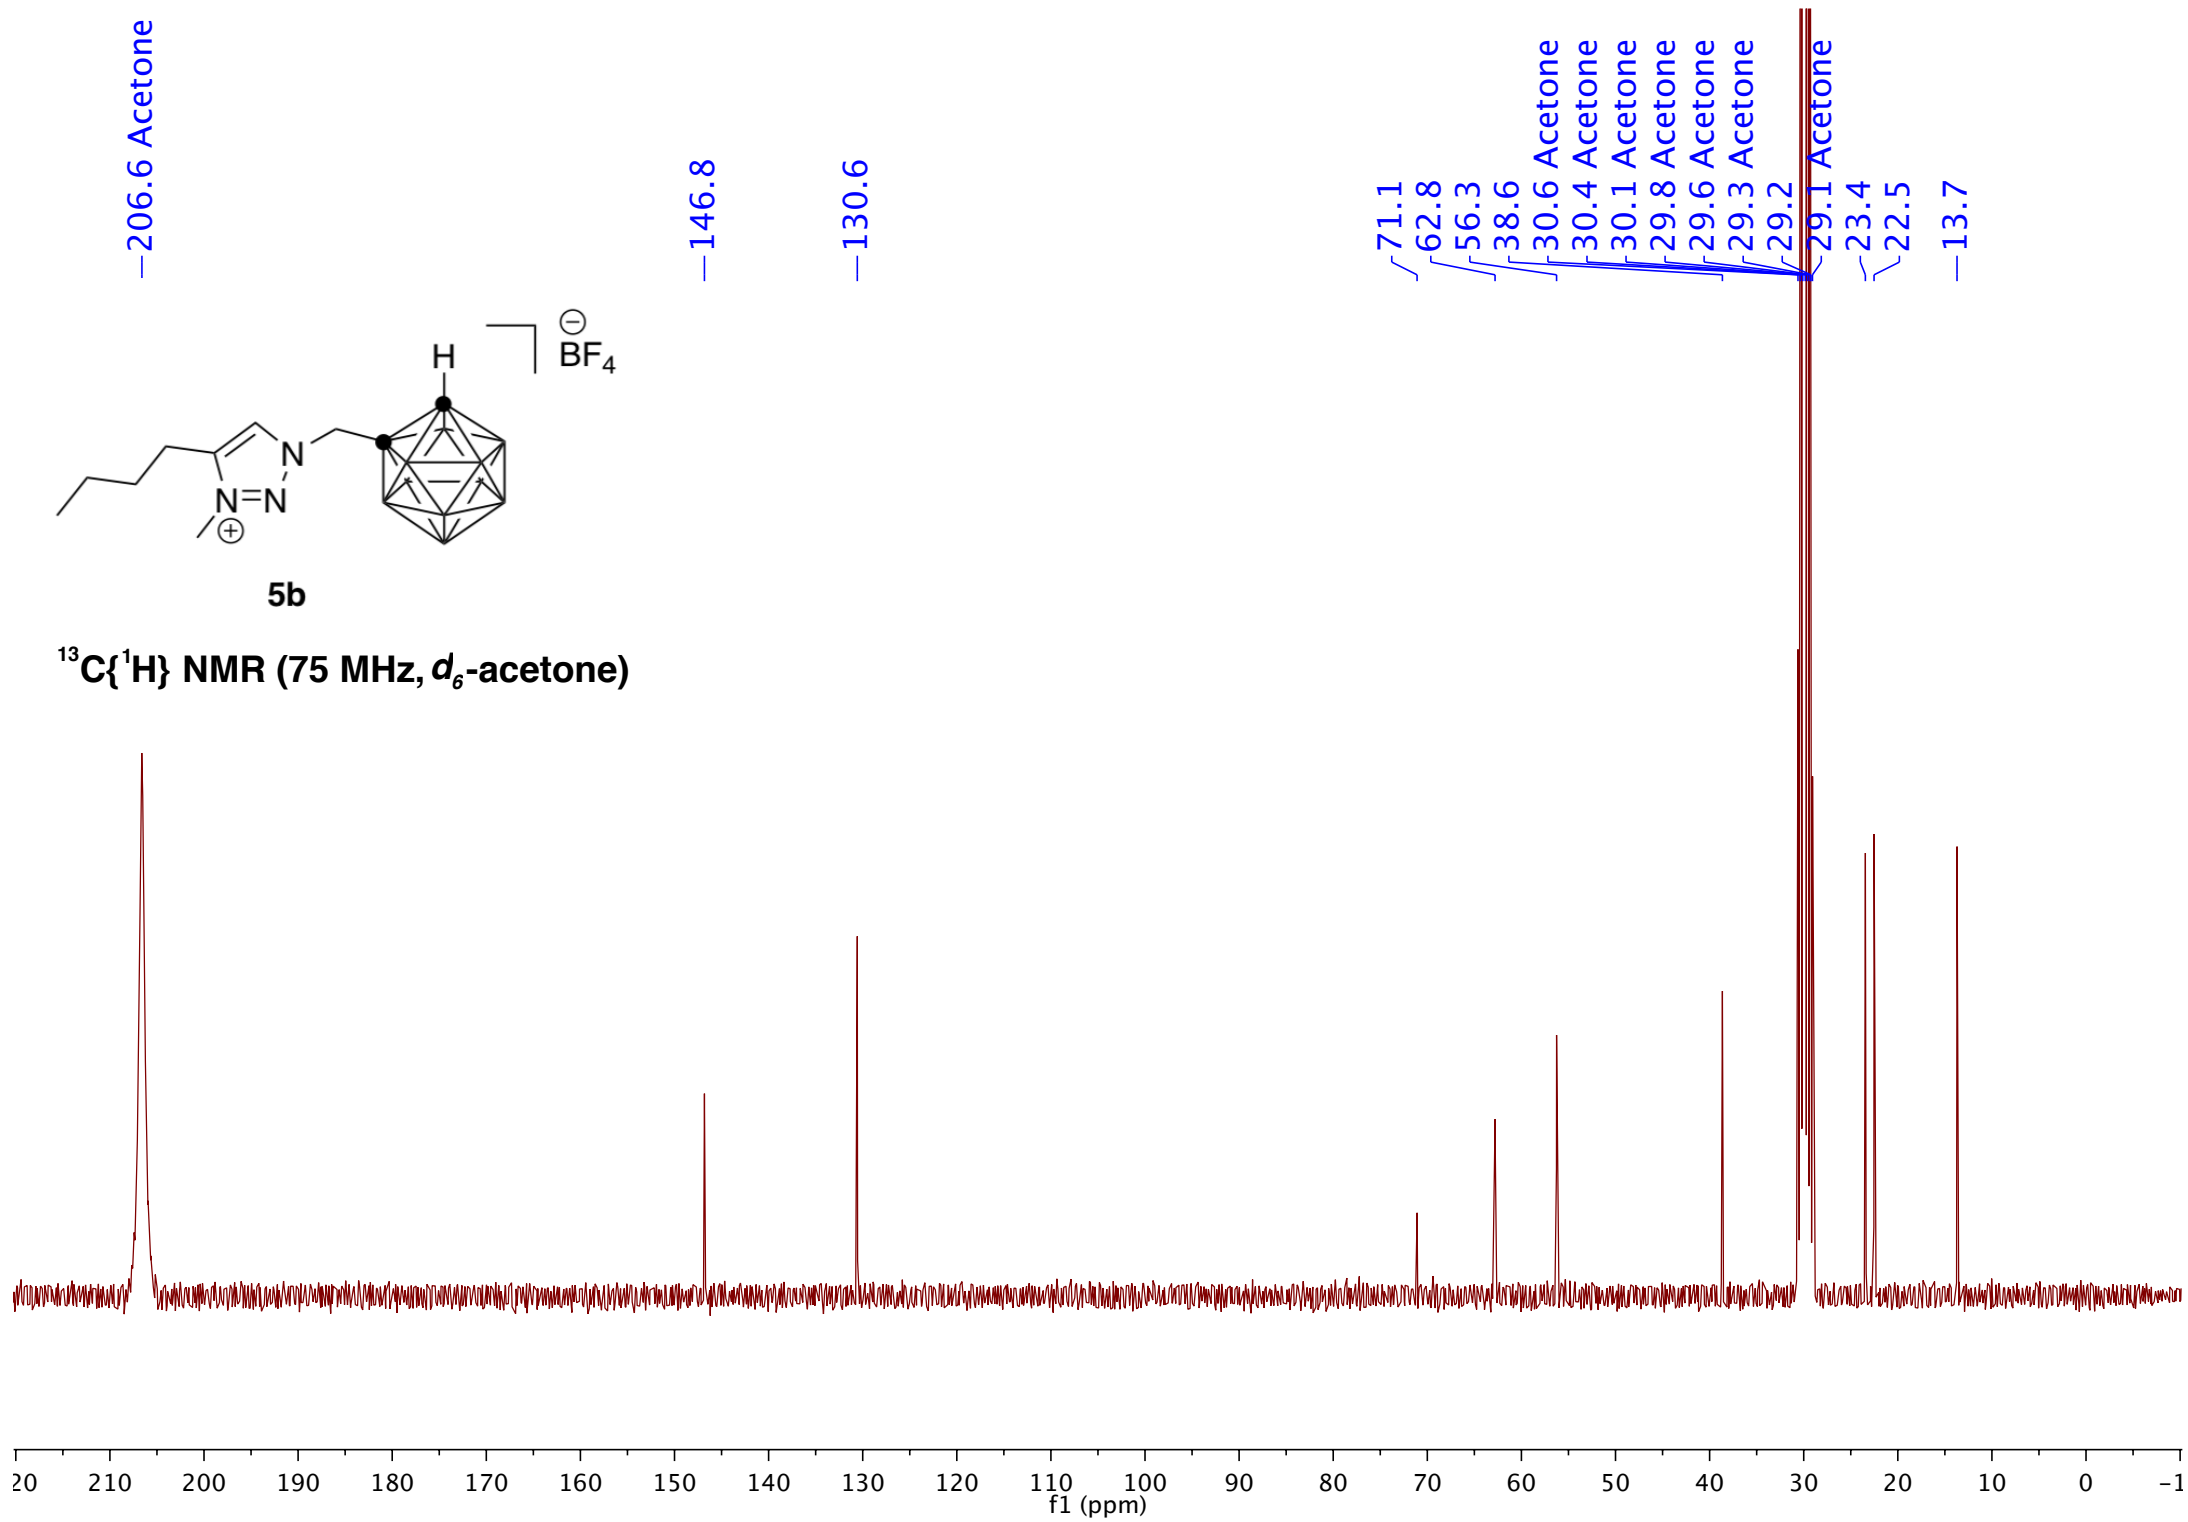

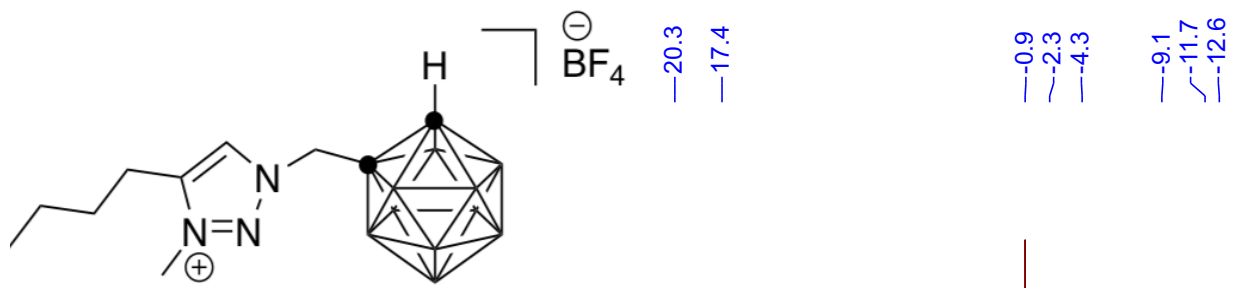

**5b**

$^{11}\text{B}\{^1\text{H}\}$  NMR (160 MHz,  $d_6$ -acetone)

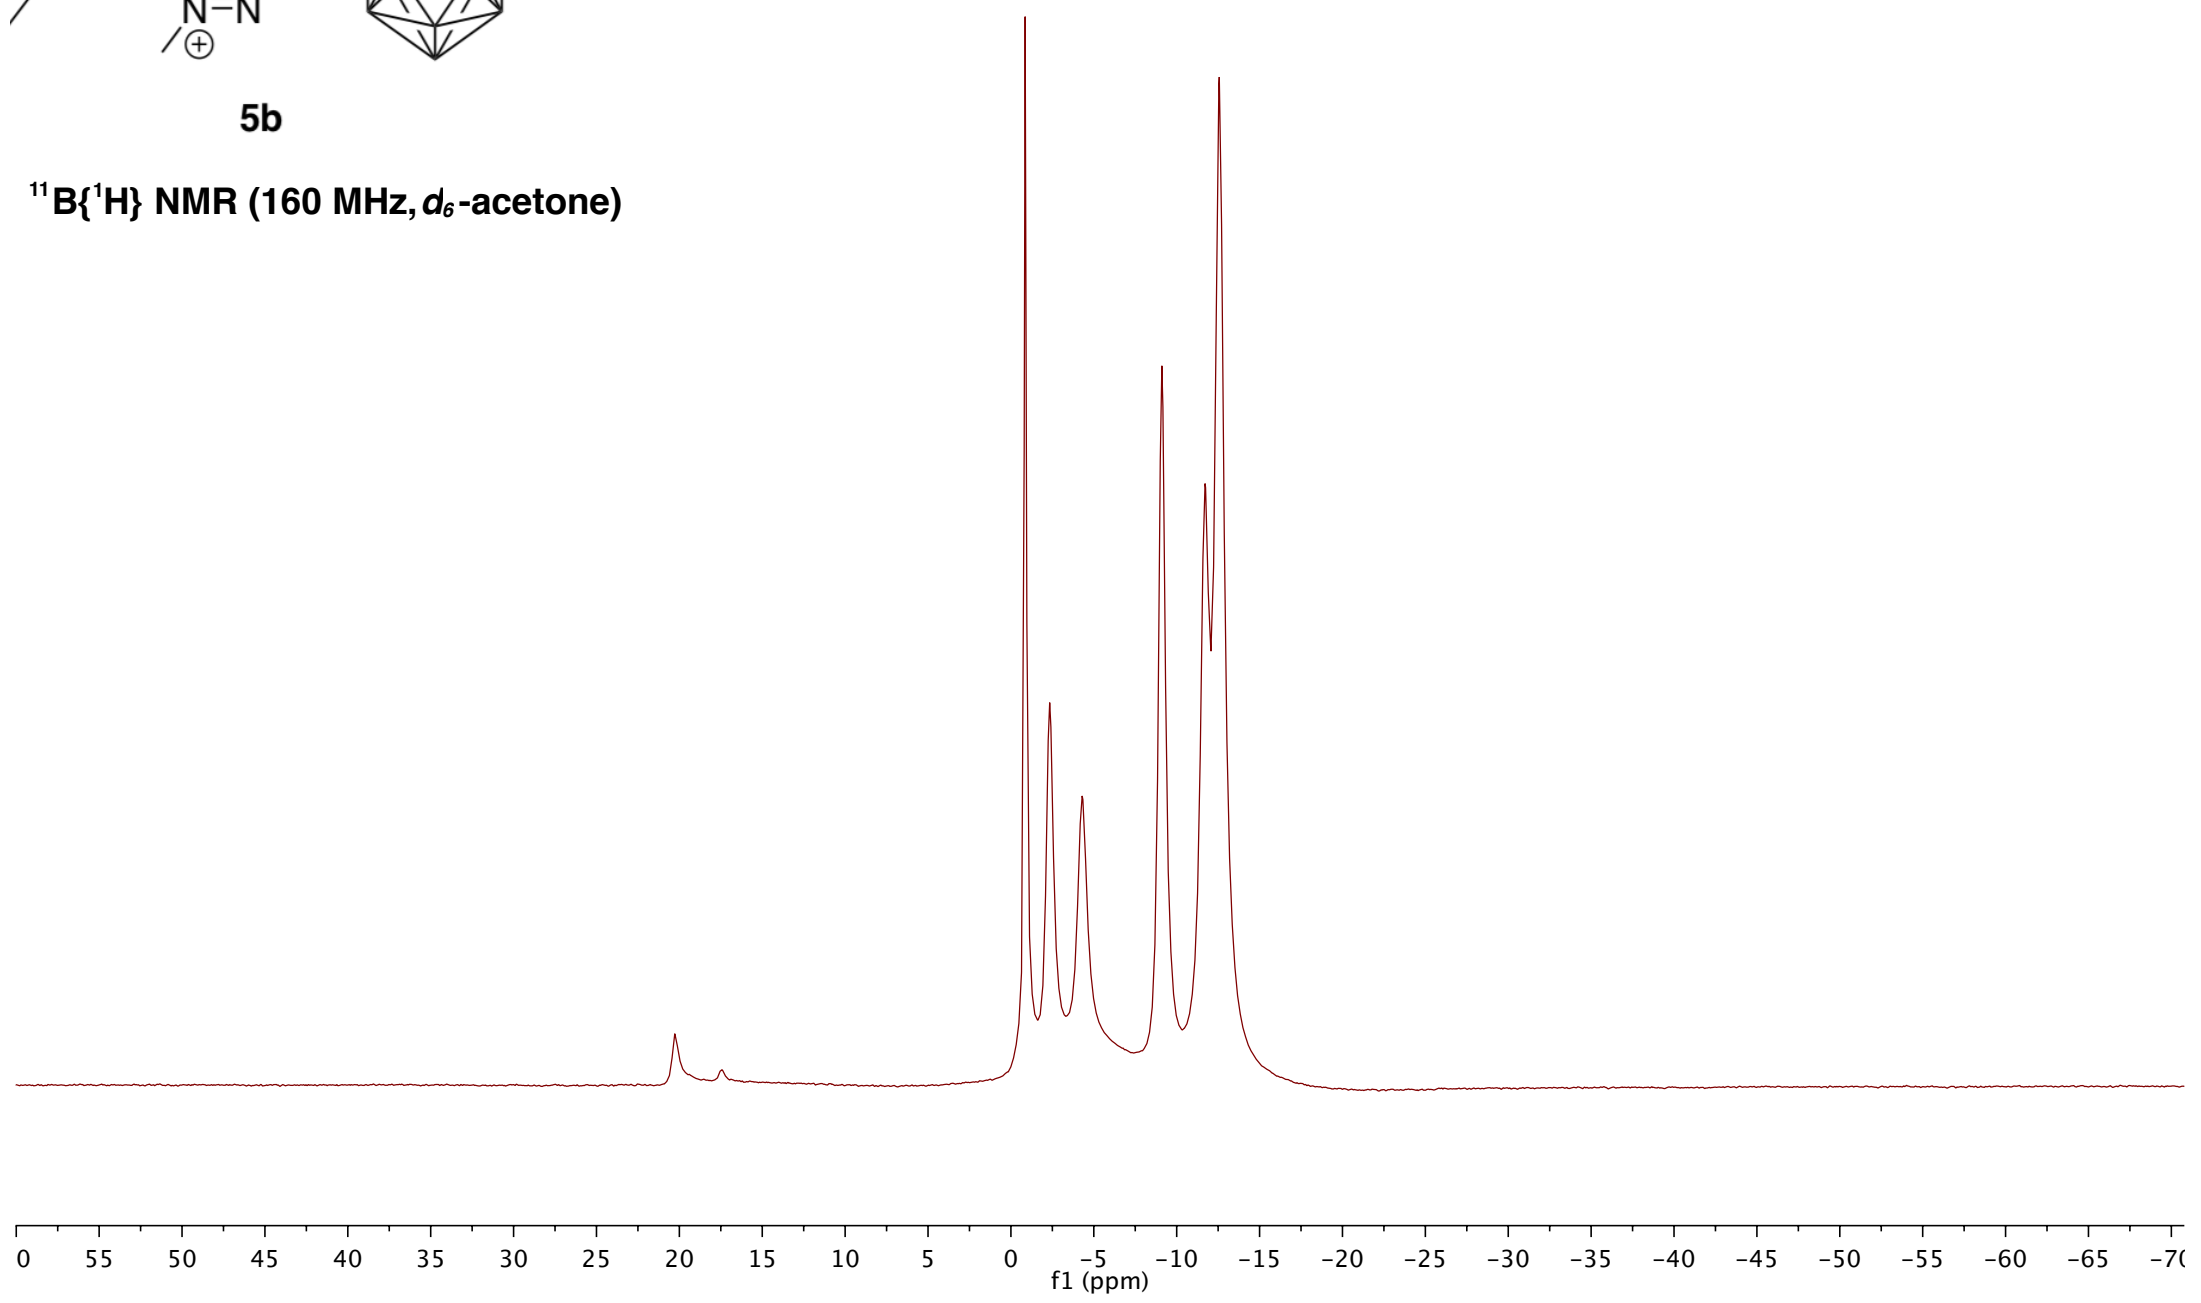

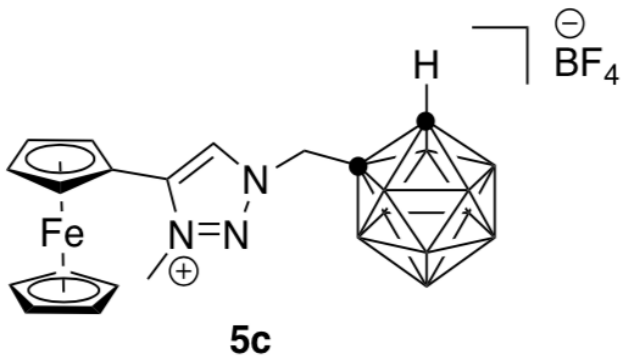

$^1\text{H}$  NMR (300 MHz,  $d_6$ -acetone)

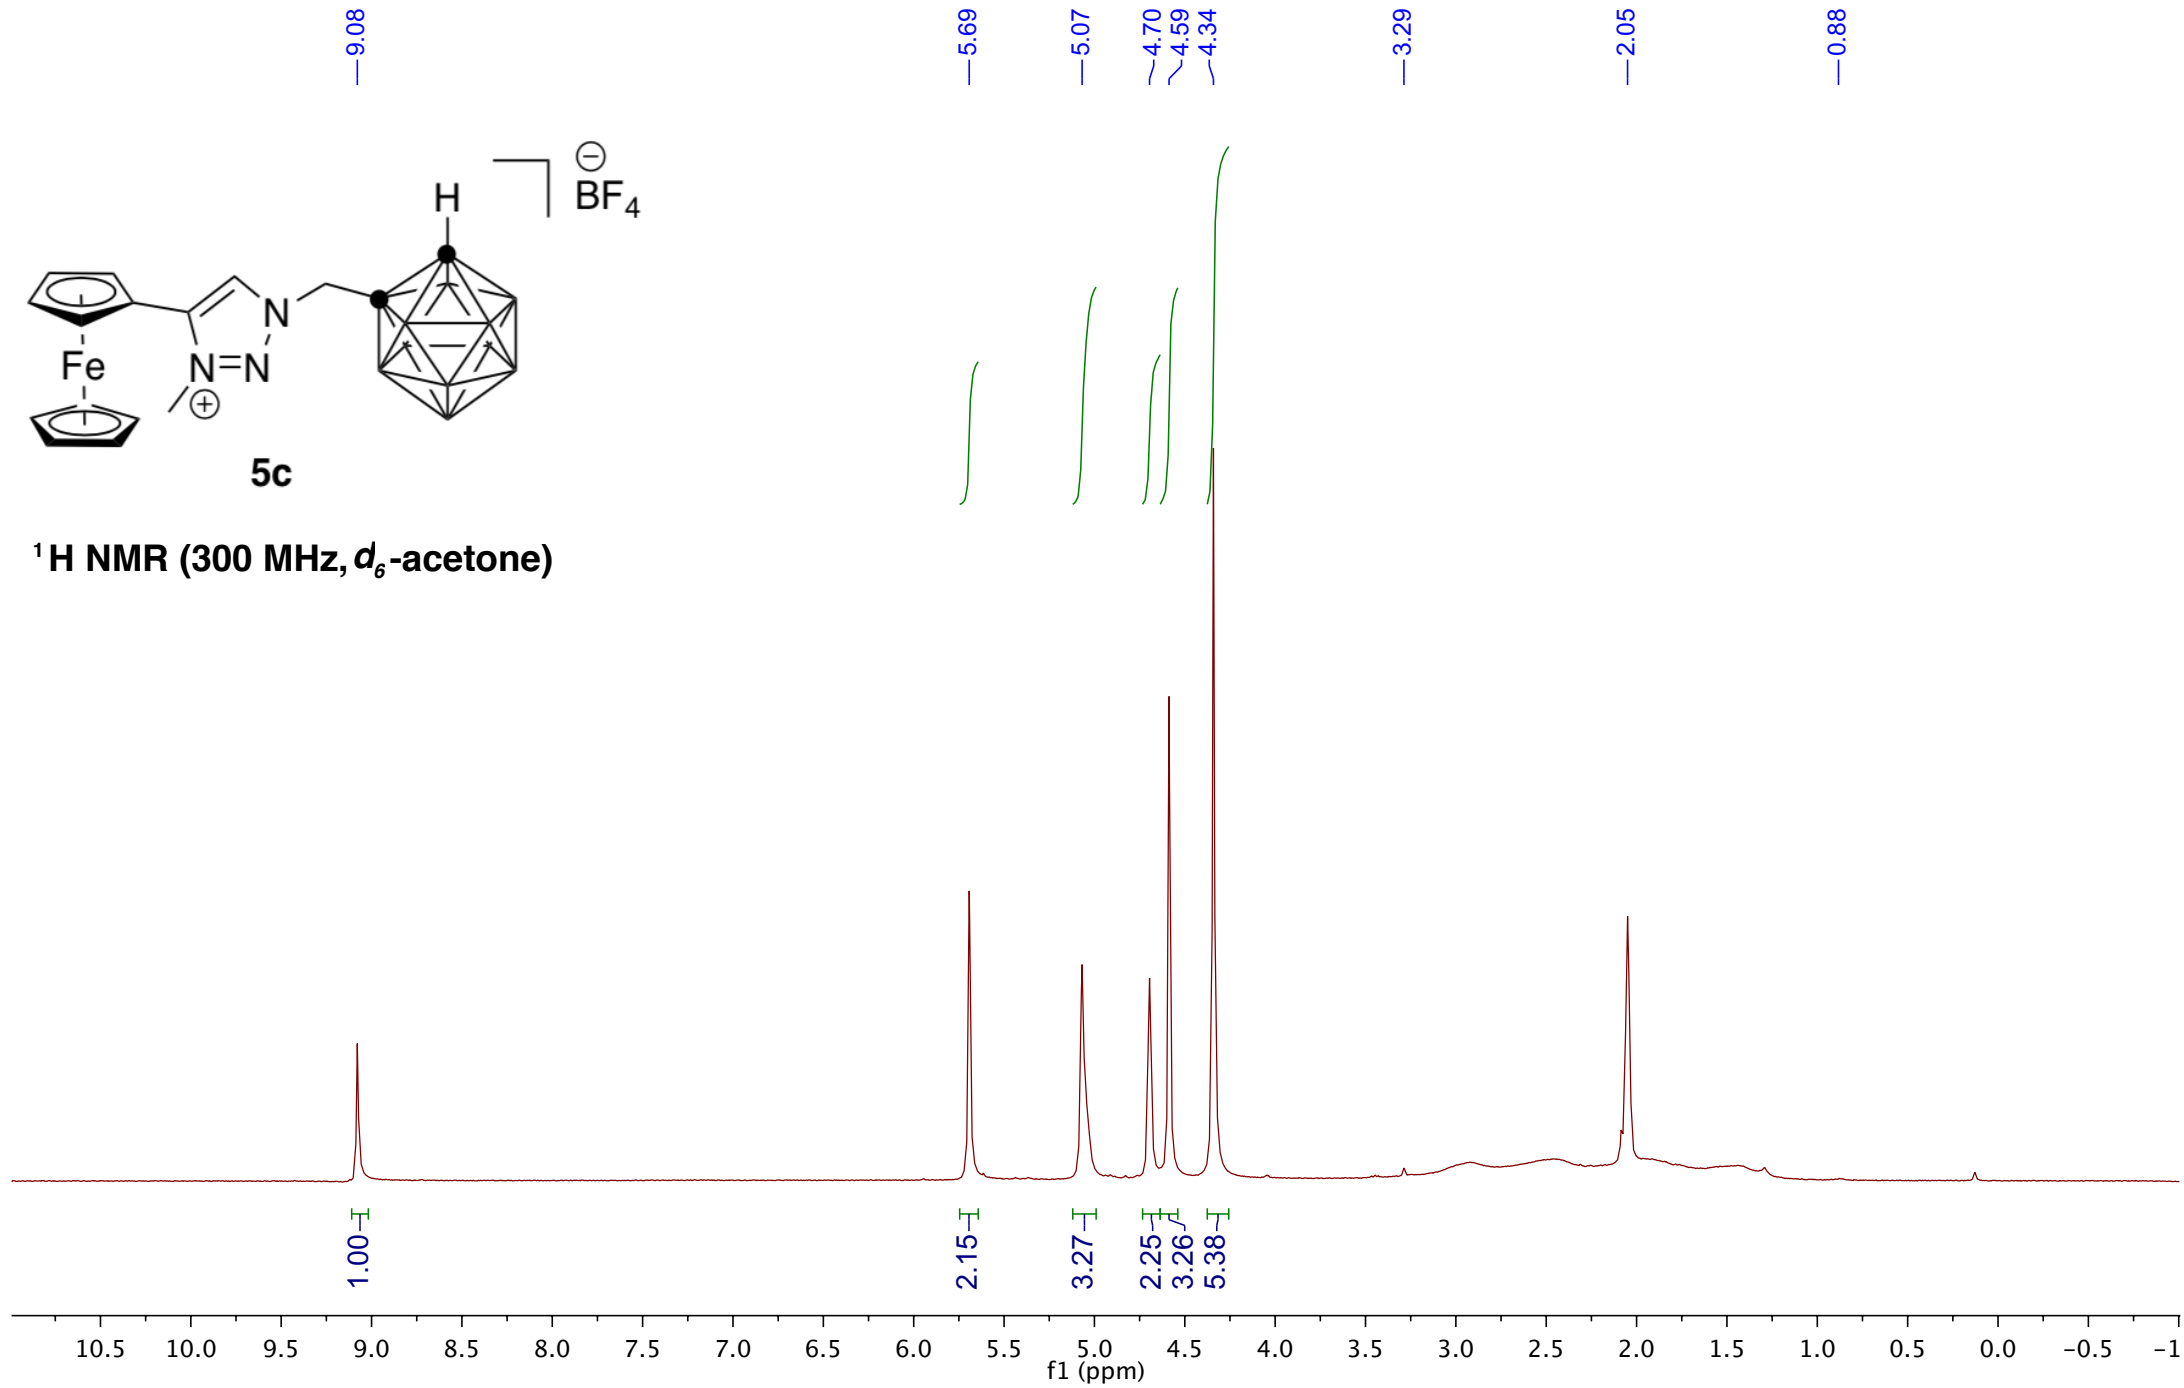

206.2 Acetone

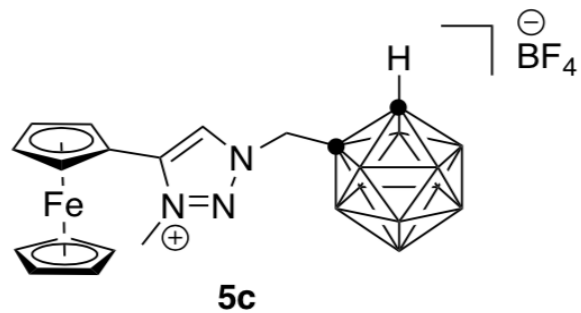

146.2

129.8

72.5  
71.3  
71.2  
70.2  
66.2  
62.9

56.5

40.4  
30.6 Acetone  
30.4 Acetone  
30.1 Acetone  
29.8 (CD3)2CO  
29.6 Acetone  
29.3 Acetone  
29.1 Acetone

$^{13}\text{C}\{^1\text{H}\}$  NMR (75 MHz,  $d_6$ -acetone)

210 200 190 180 170 160 150 140 130 120 110 100 90 80 70 60 50 40 30 20 10 0 -10

f1 (ppm)

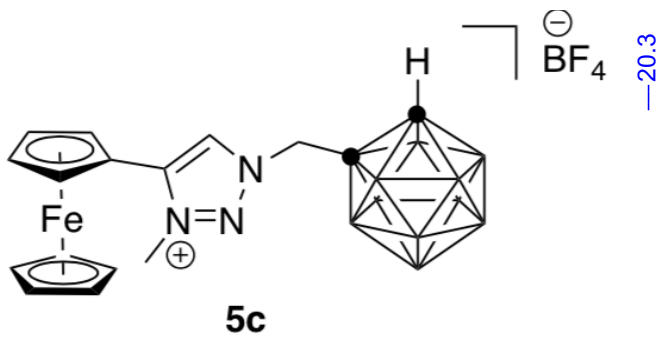

$^{11}\text{B}\{^1\text{H}\}$  NMR (160 MHz,  $d_6$ -acetone)

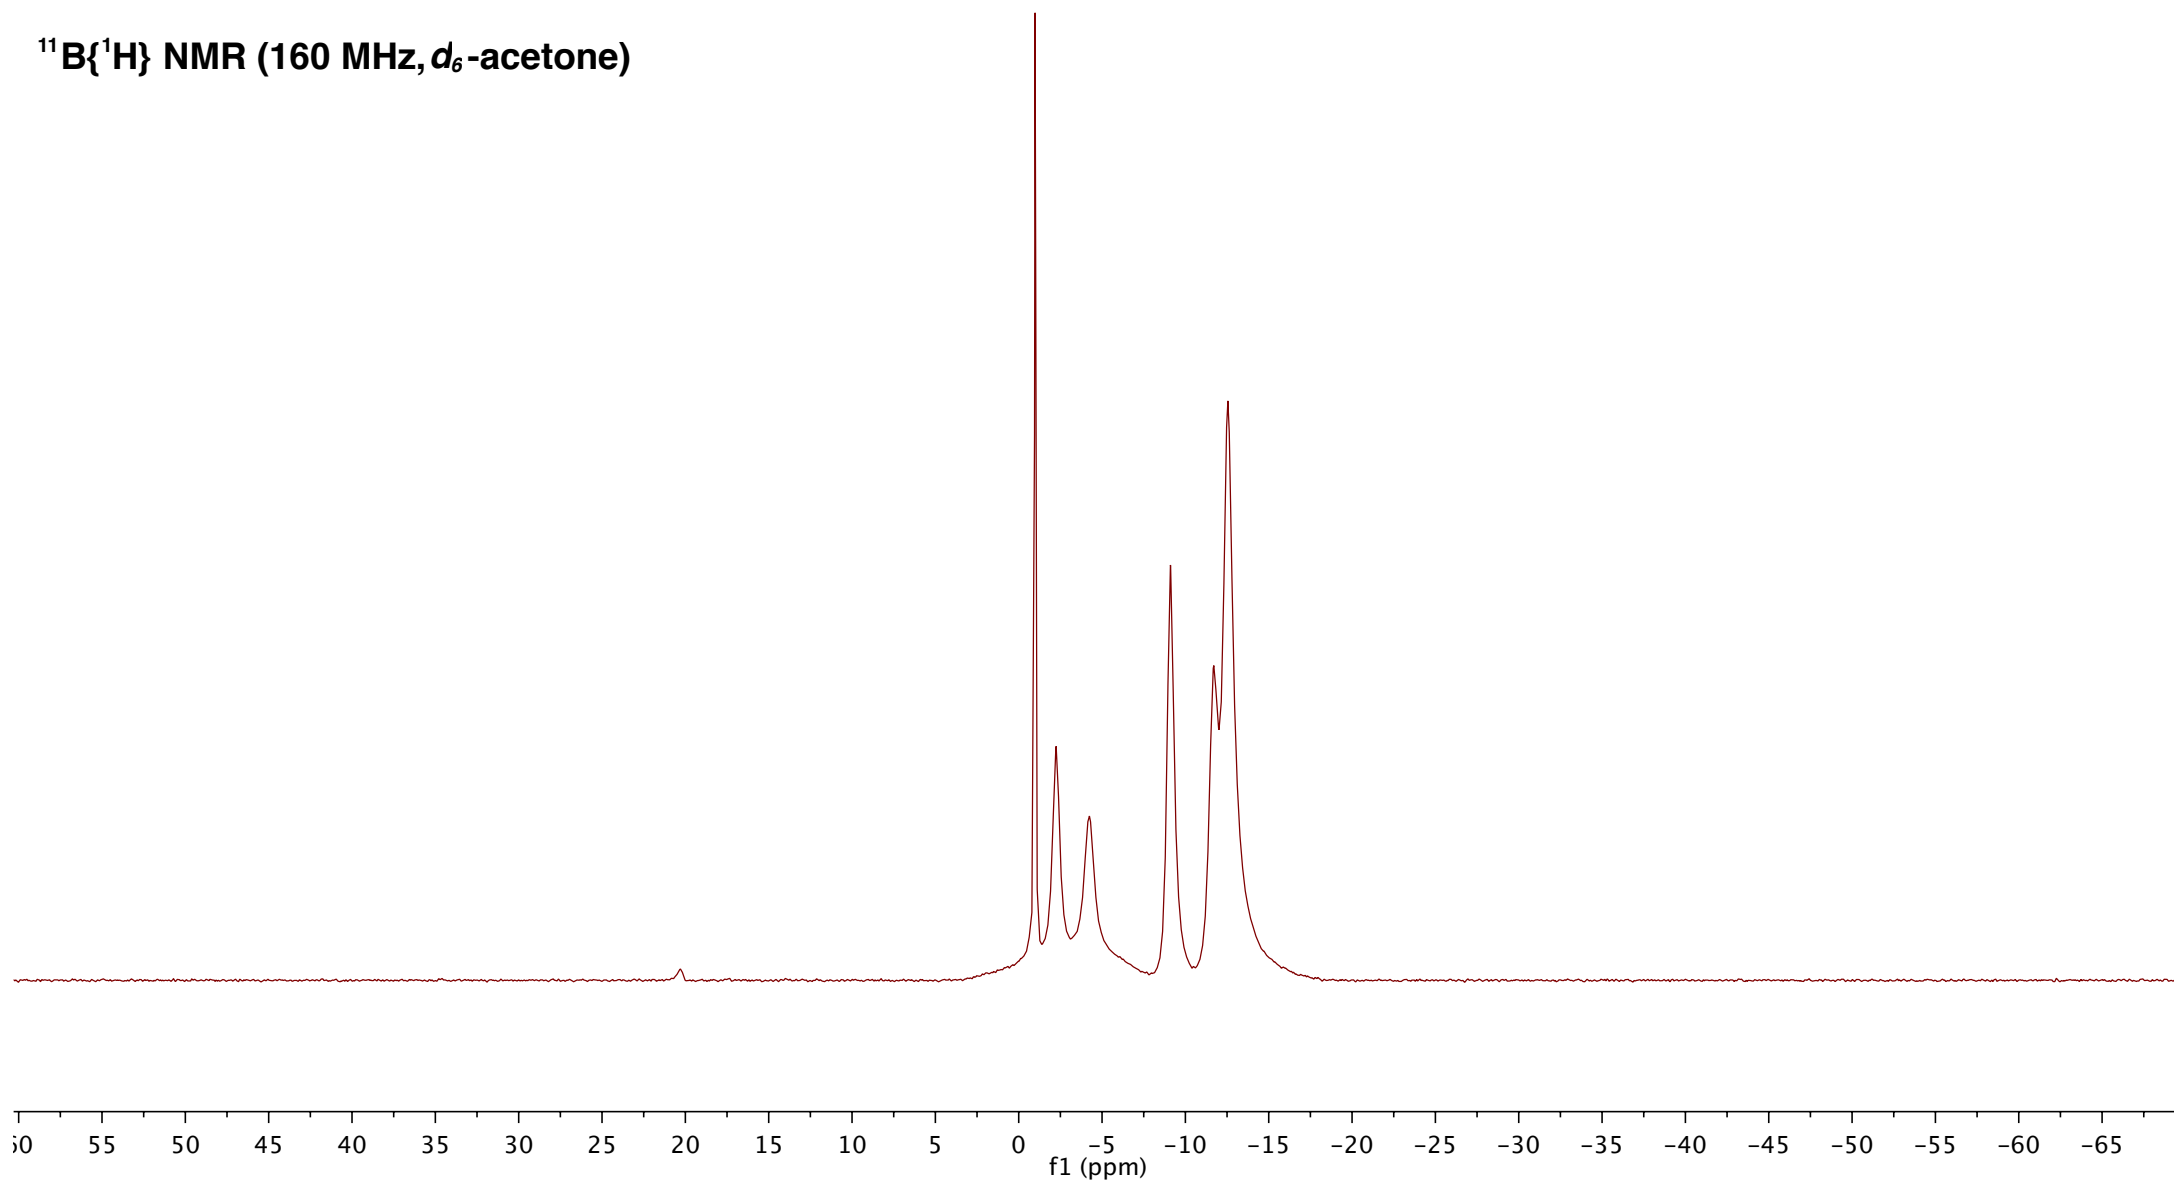

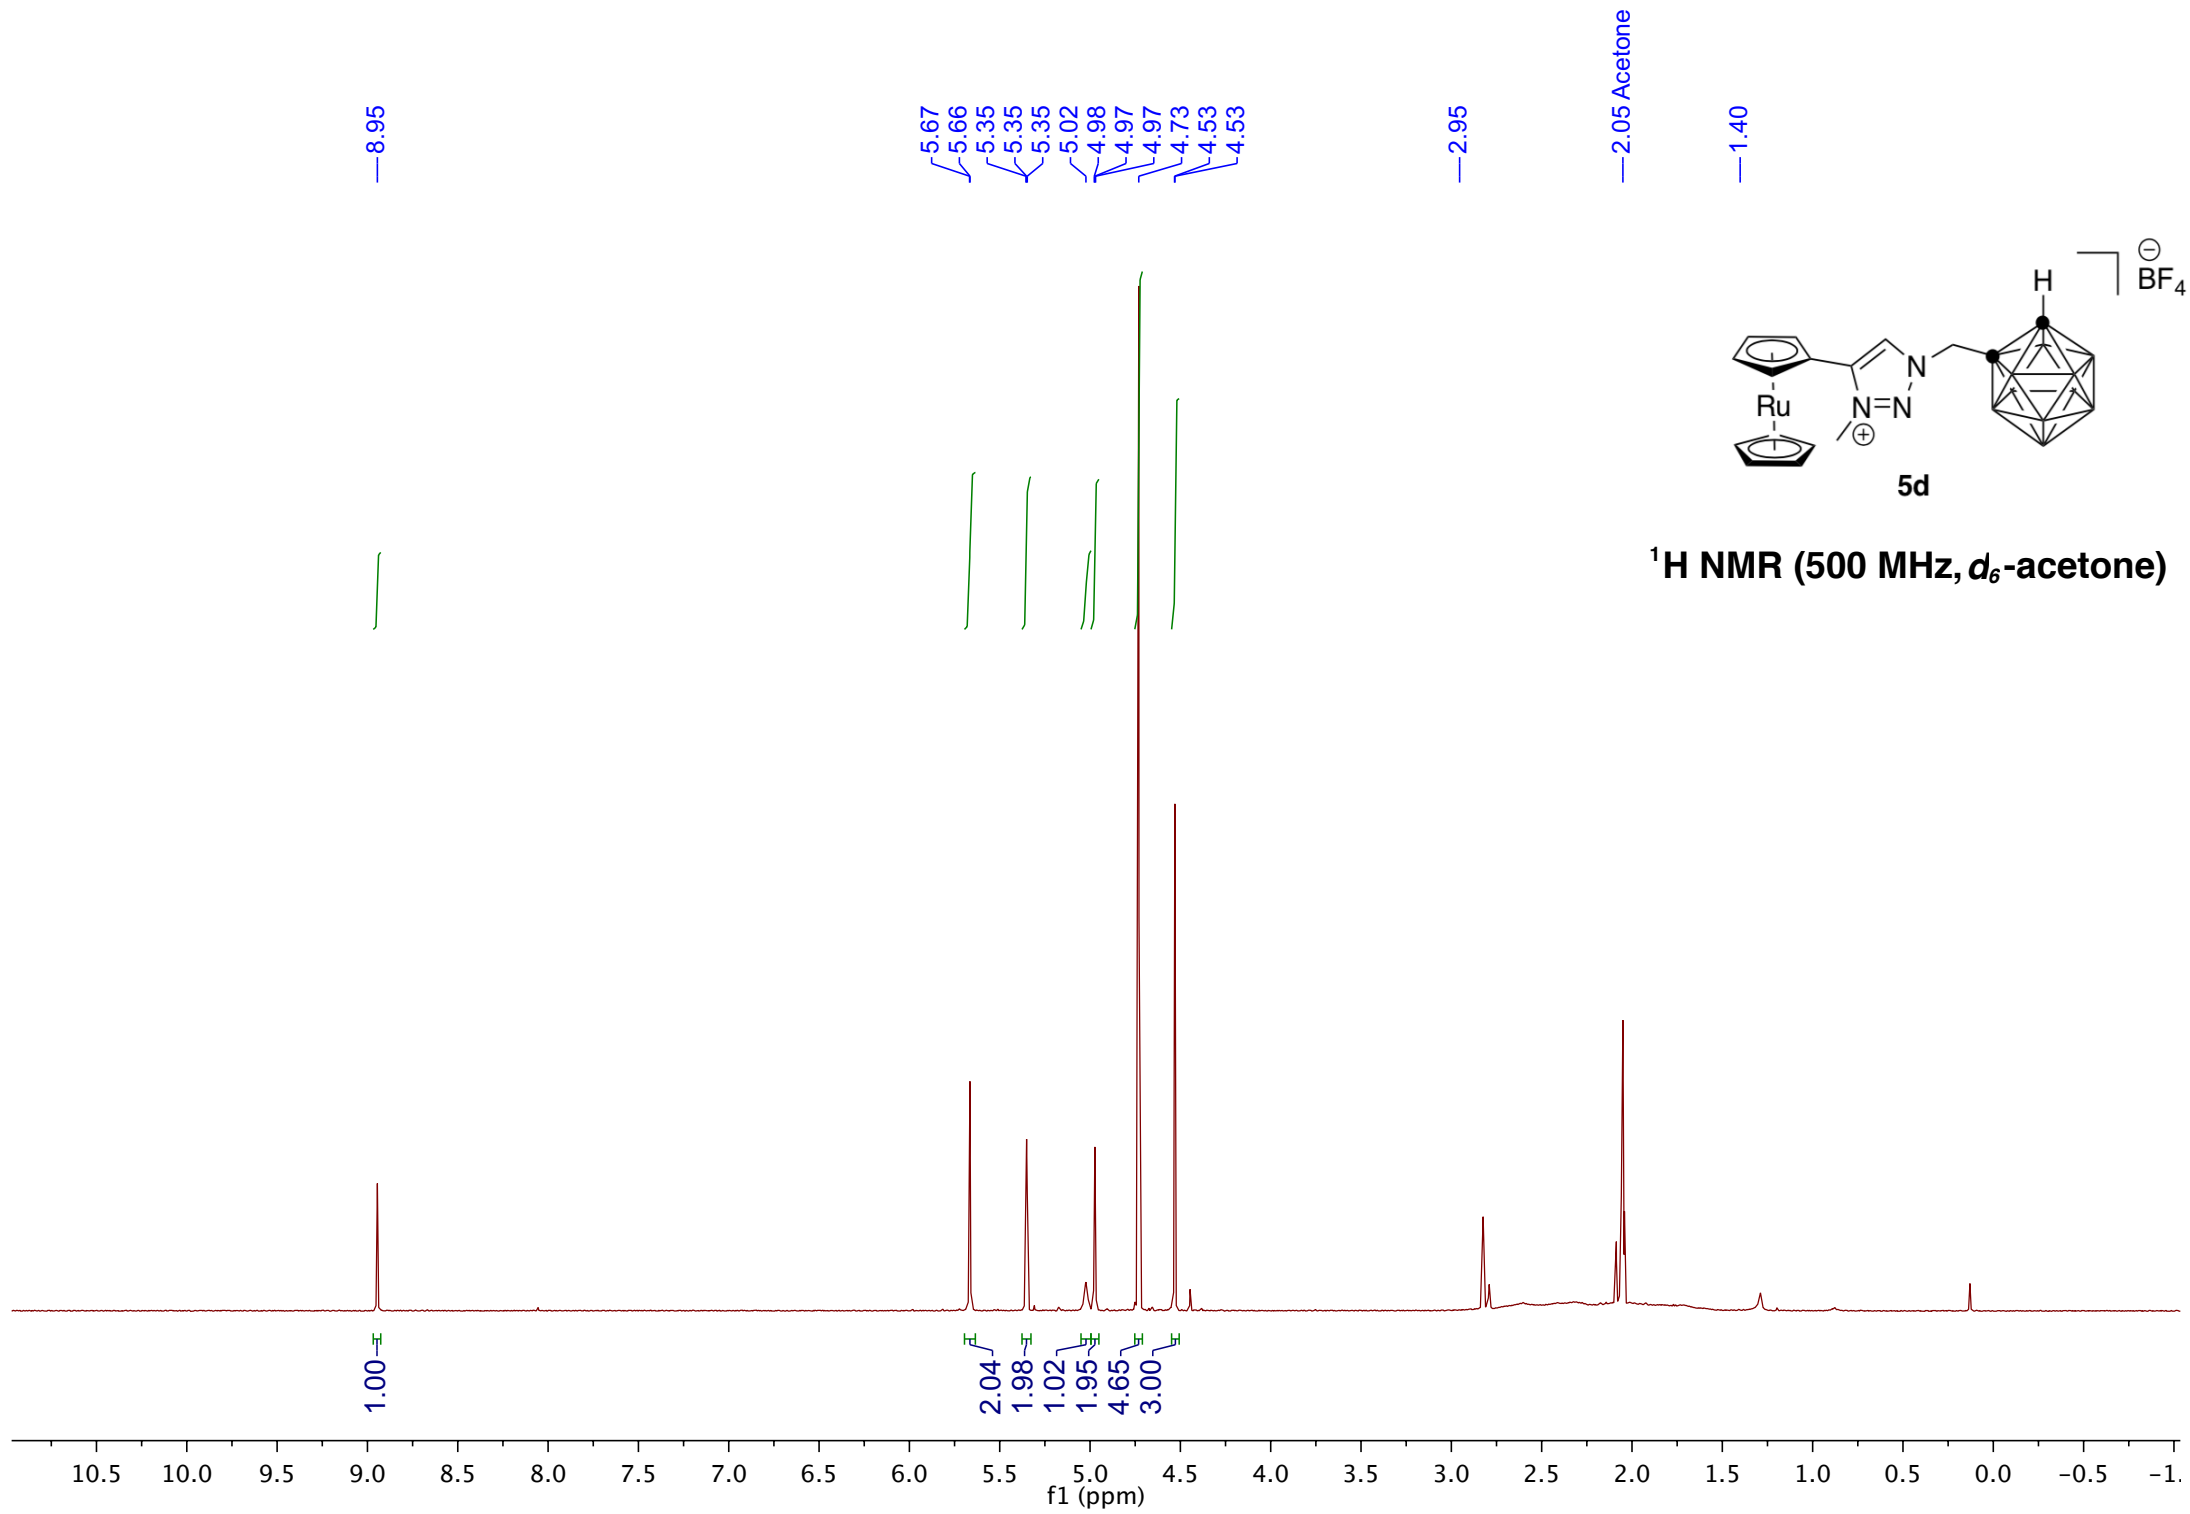

206.1 Acetone

144.8

130.1

74.0

73.3

72.3

71.2

70.1

63.0

56.5

40.3

30.6 Acetone

30.4 Acetone

30.1 Acetone

29.8 Acetone

29.6 Acetone

29.3 Acetone

29.1 Acetone

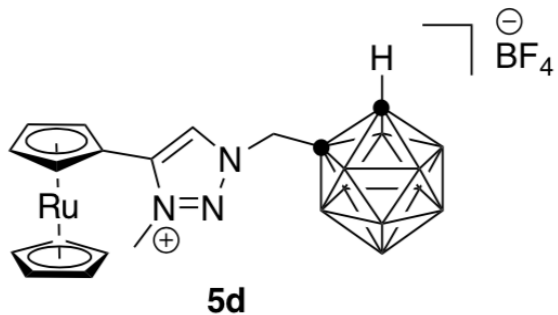

$^{13}\text{C}\{^1\text{H}\}$  NMR (75 MHz,  $d_6$ -acetone)

210 200 190 180 170 160 150 140 130 120 110 100 90 80 70 60 50 40 30 20 10 0 -10  
f1 (ppm)



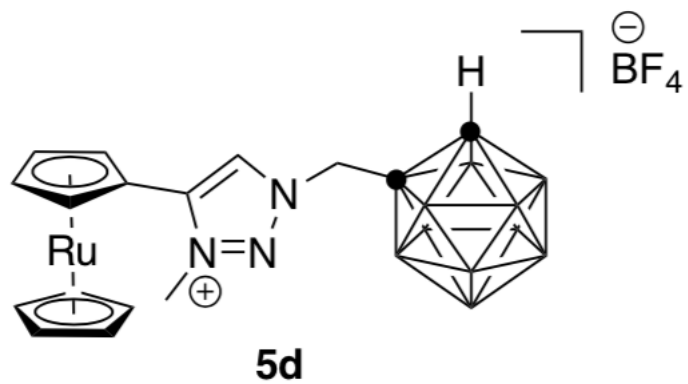

$^{11}\text{B}\{^1\text{H}\}$  NMR (160 MHz,  $d_6$ -acetone)

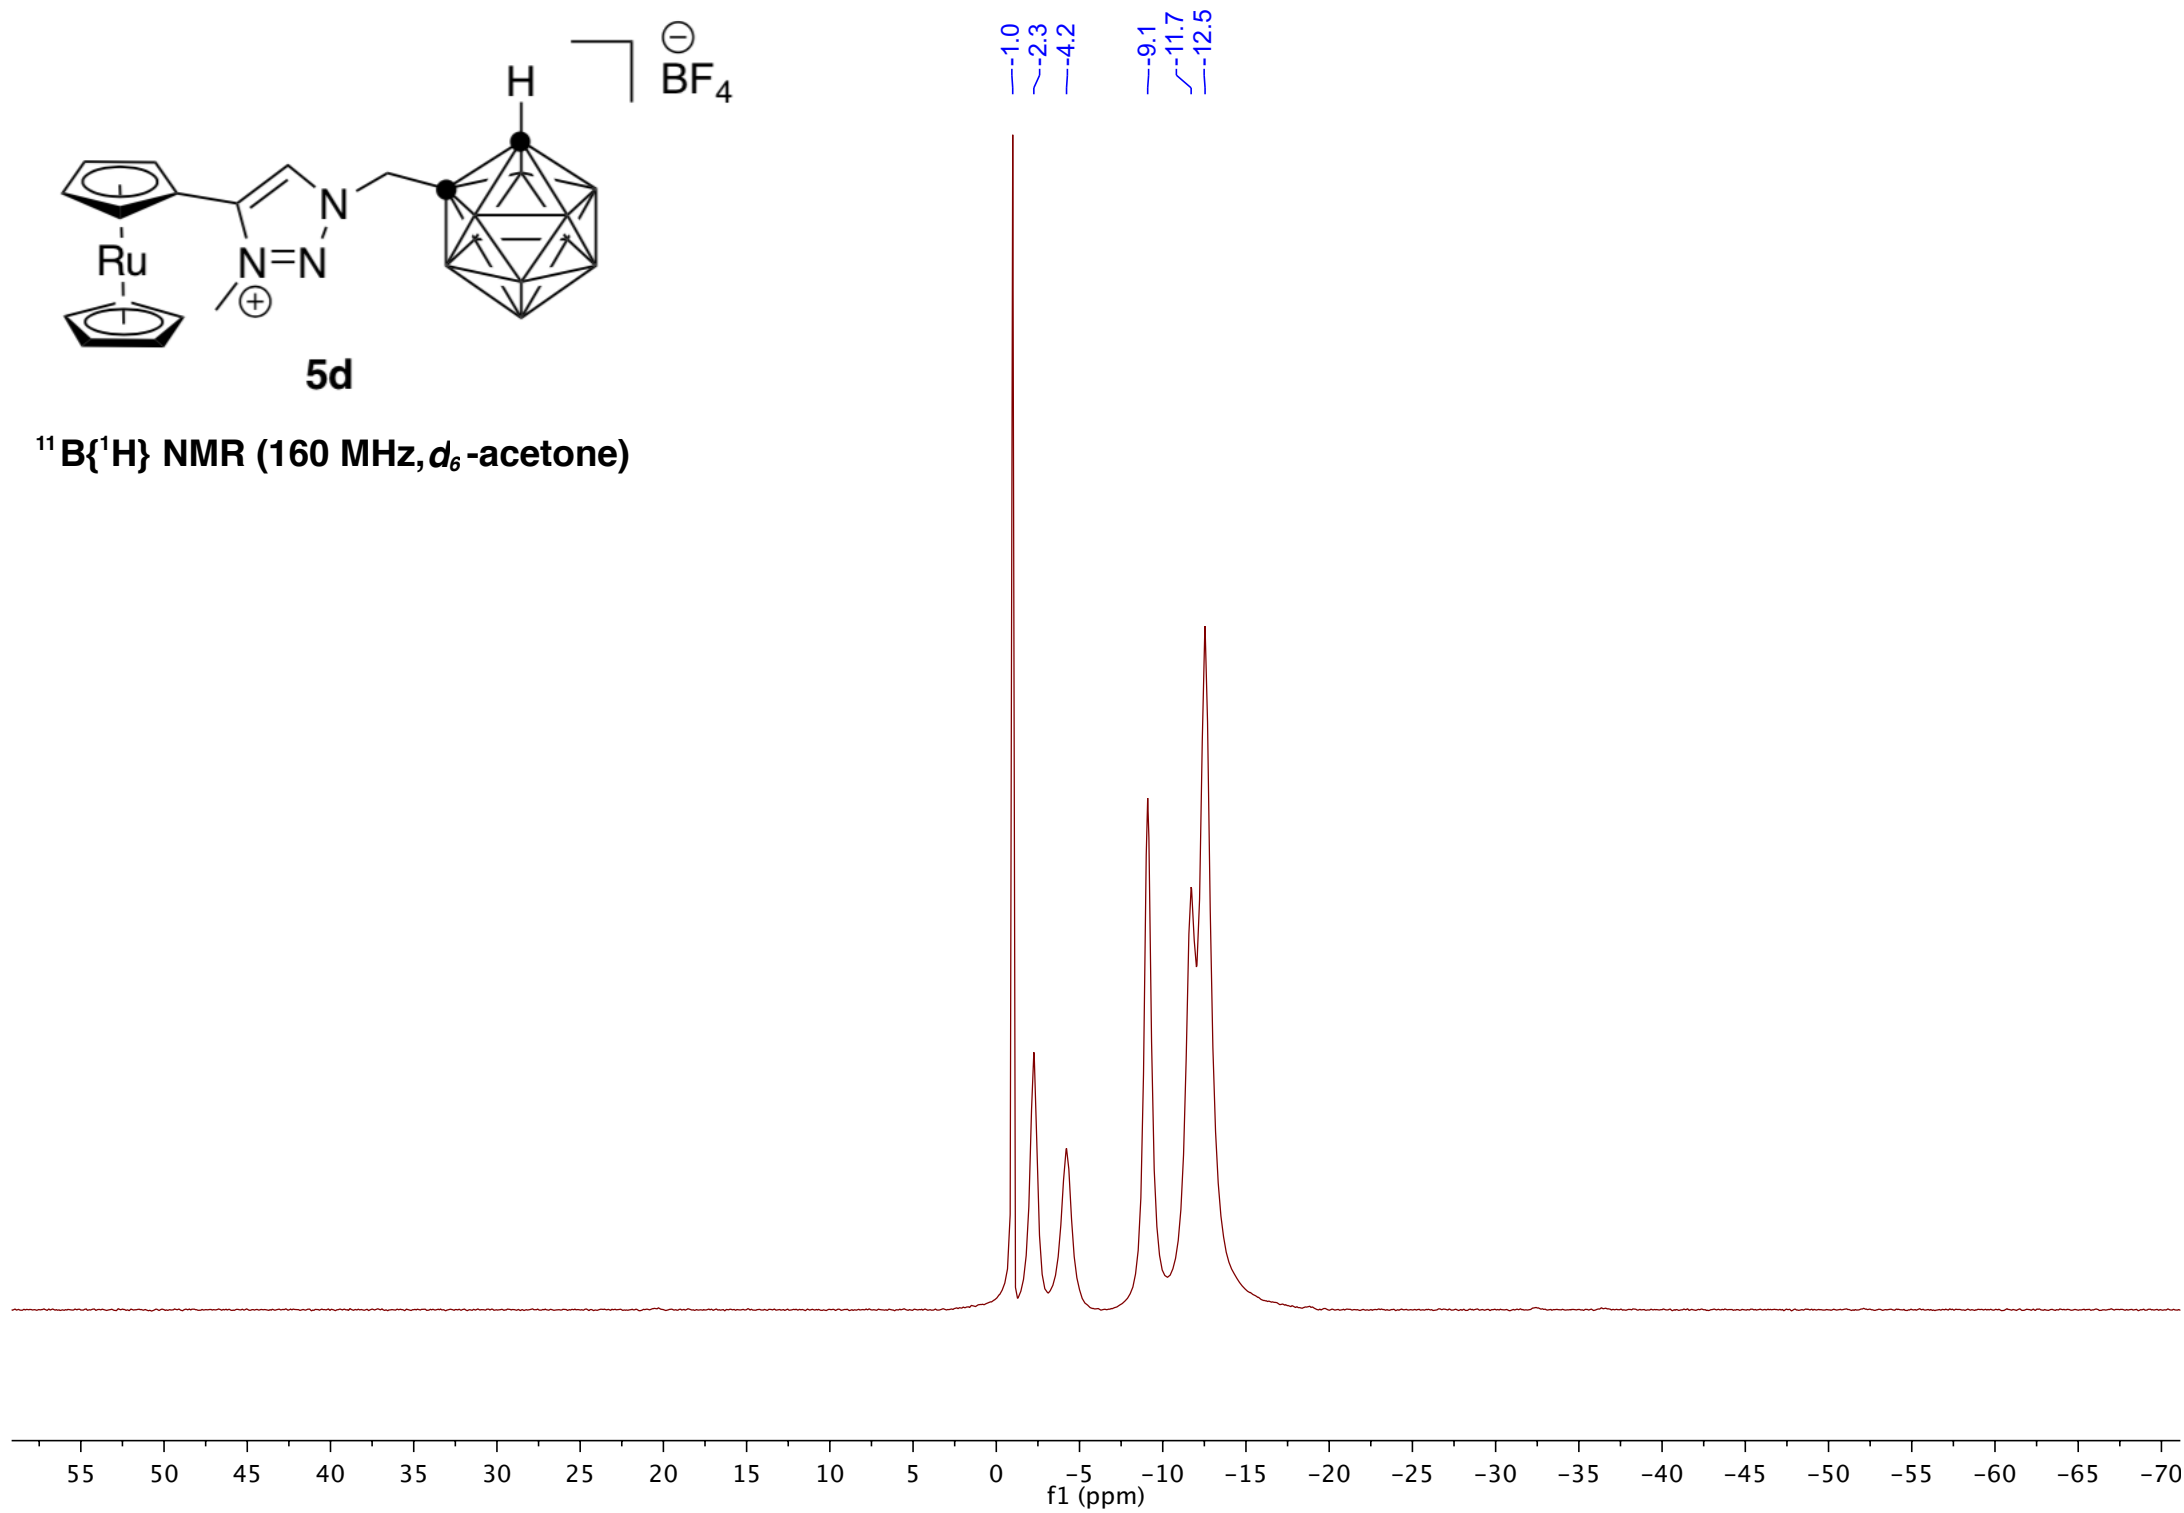

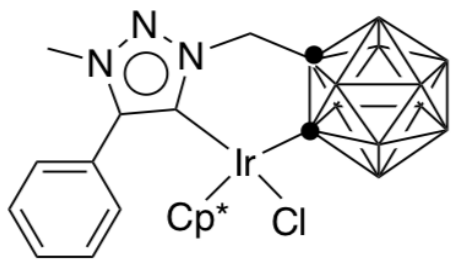

**6a**

**<sup>1</sup>H NMR (500 MHz, *d*<sub>6</sub>-acetone)**

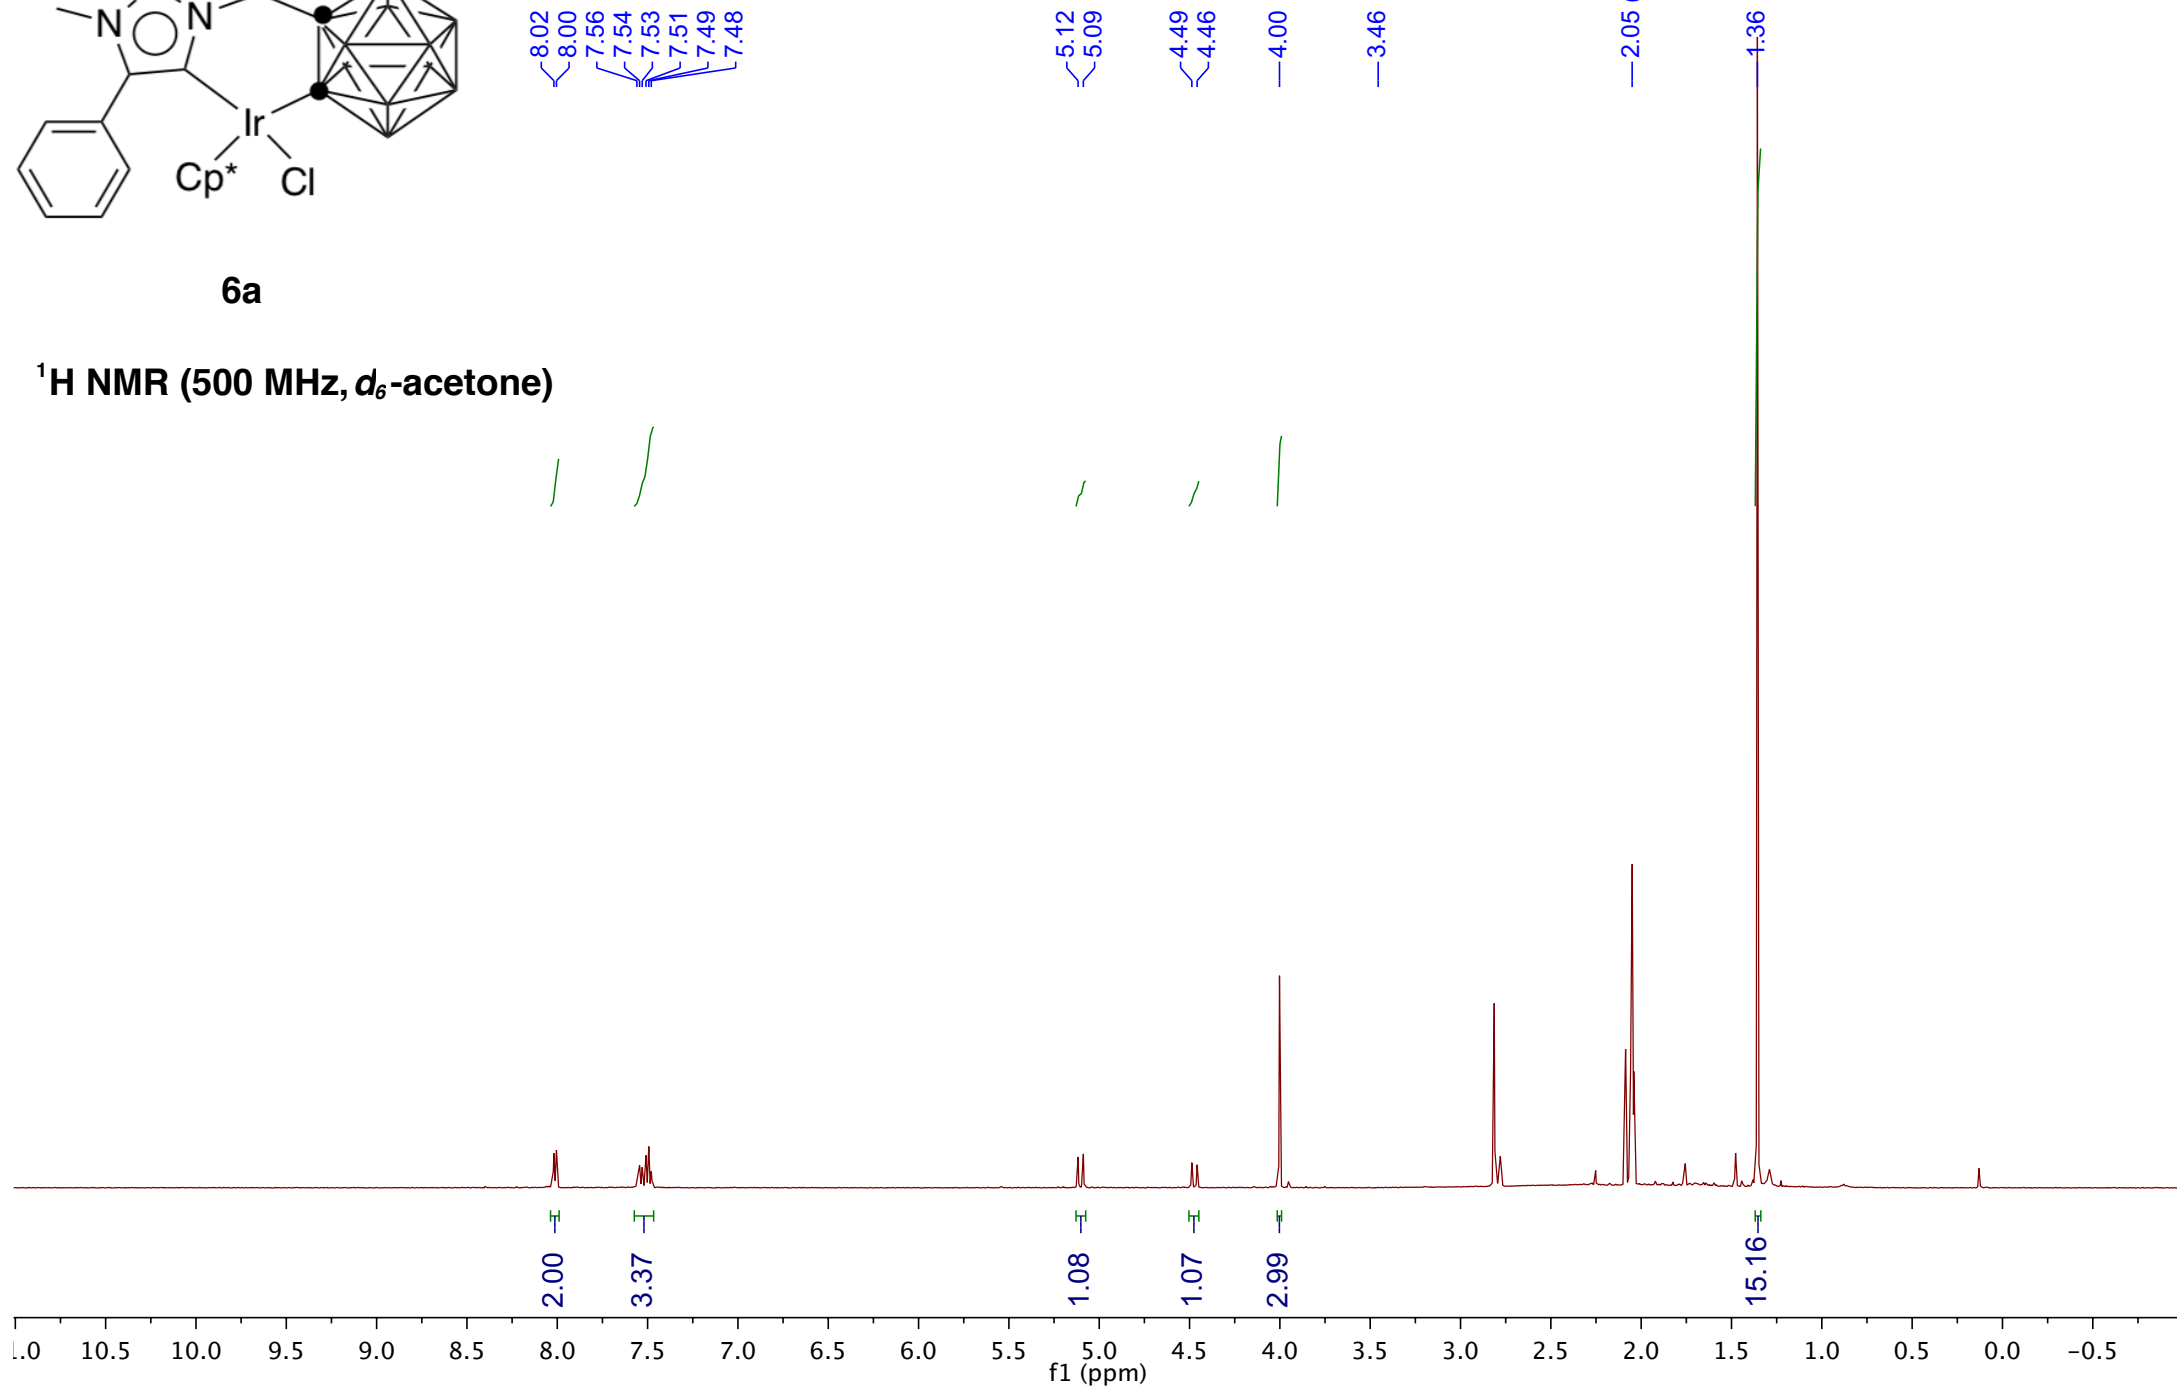

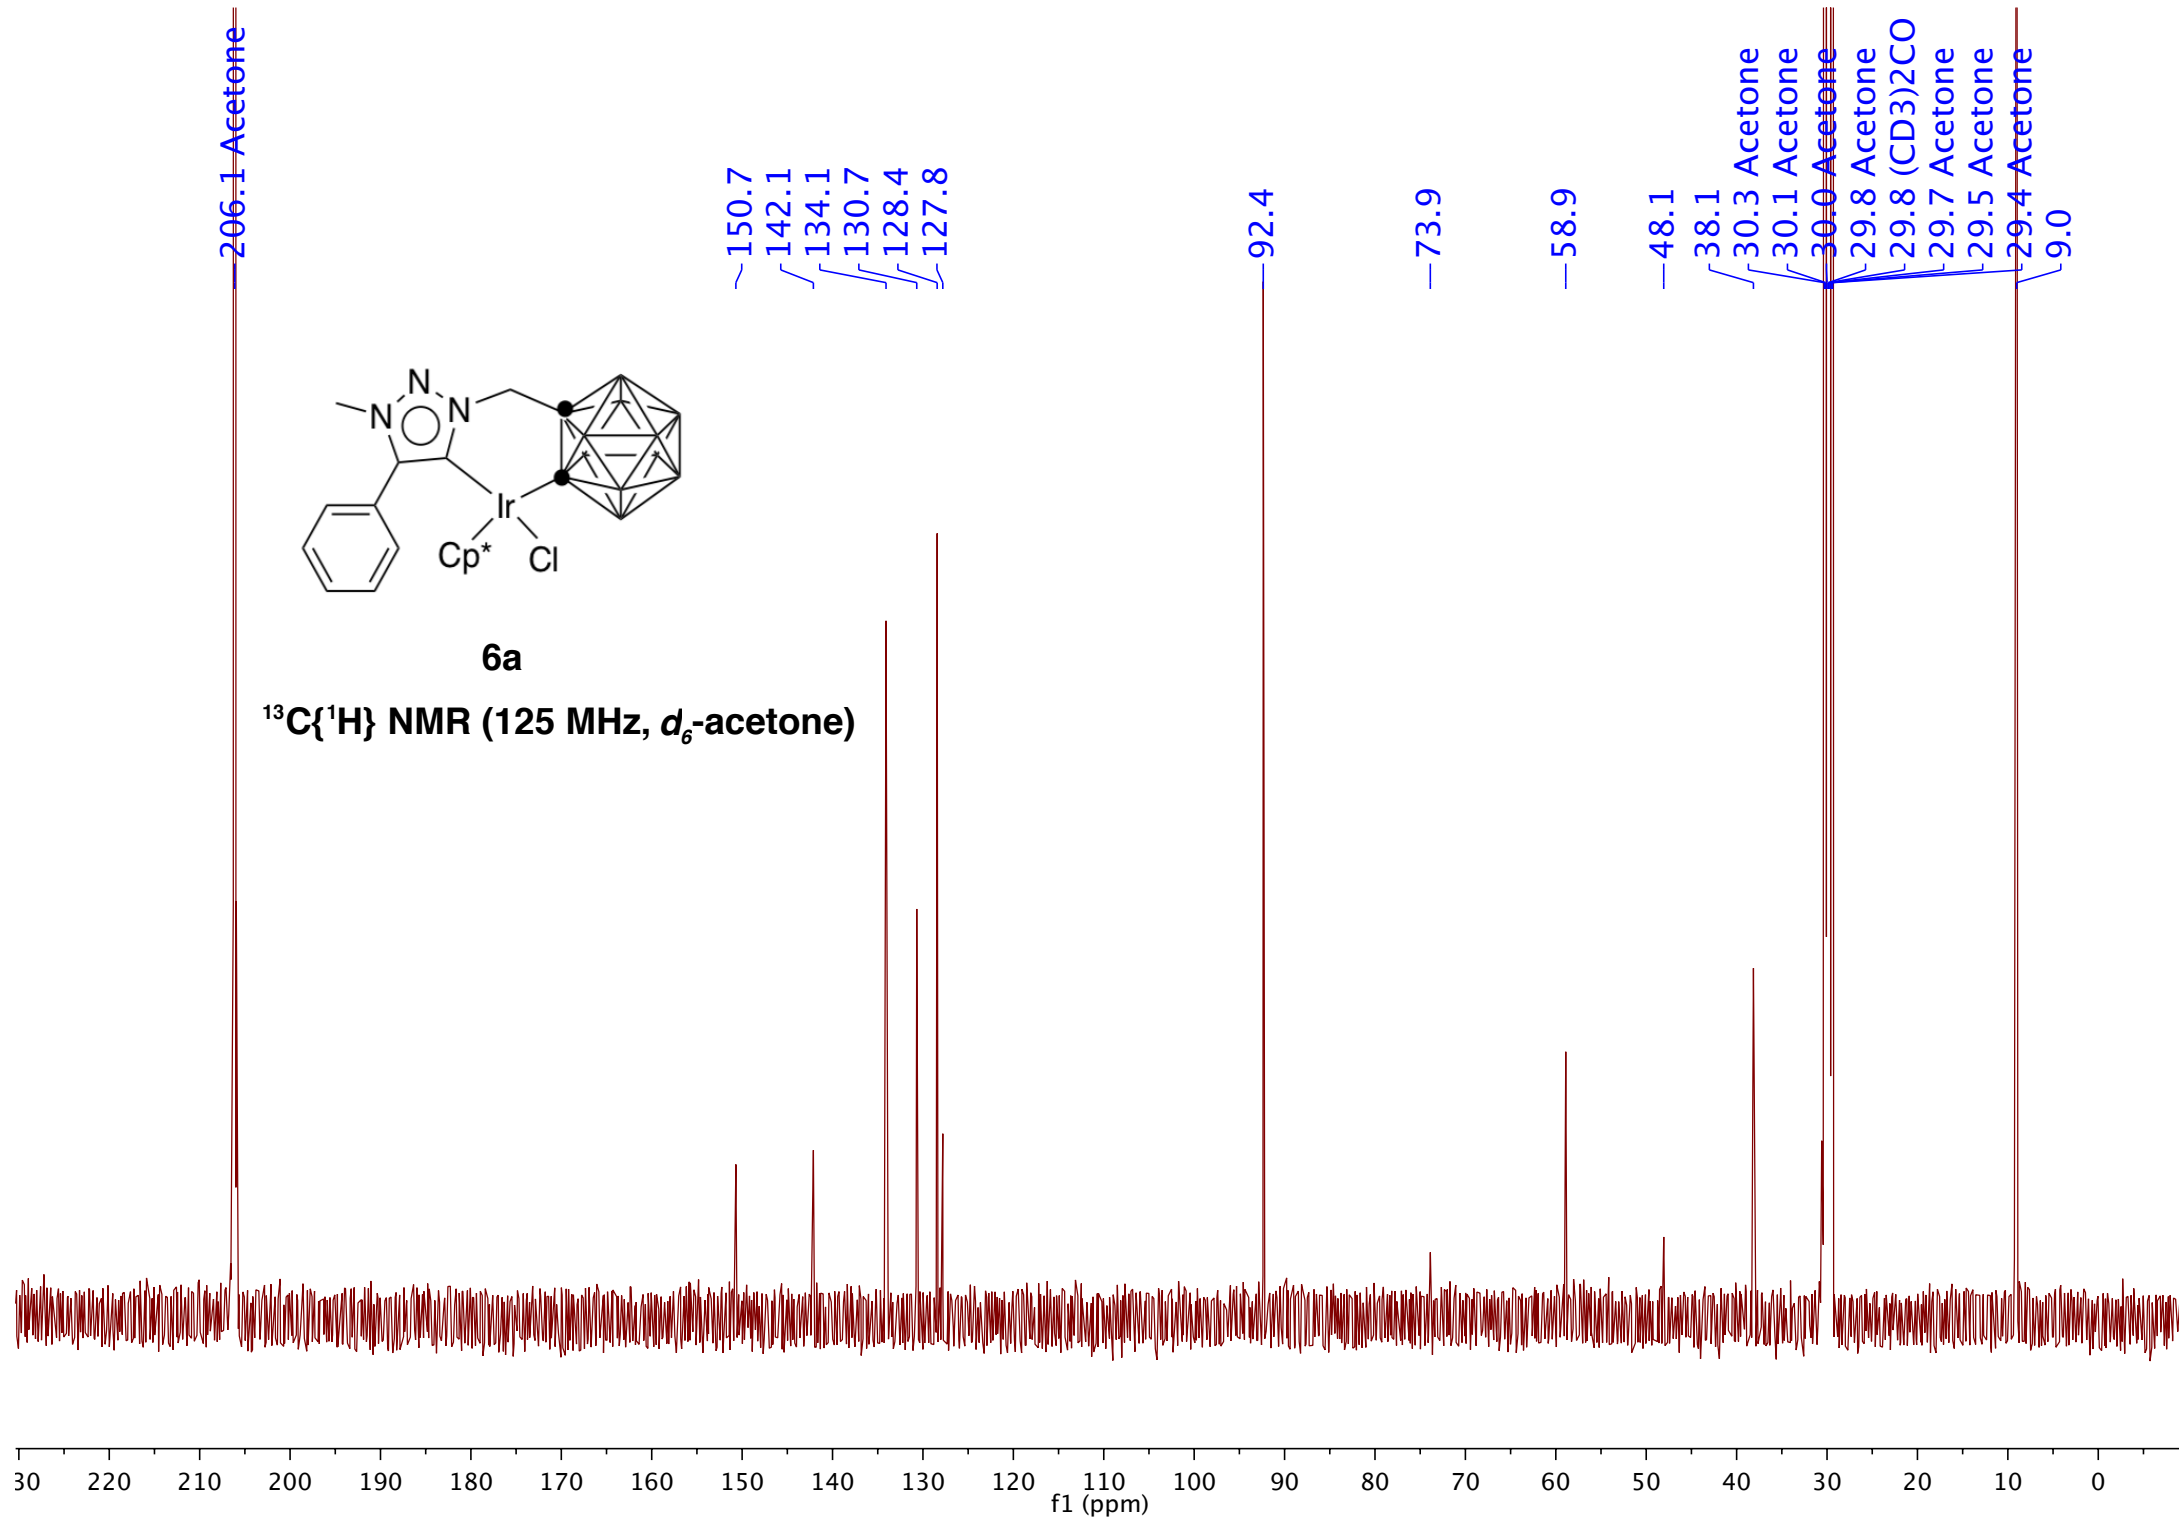

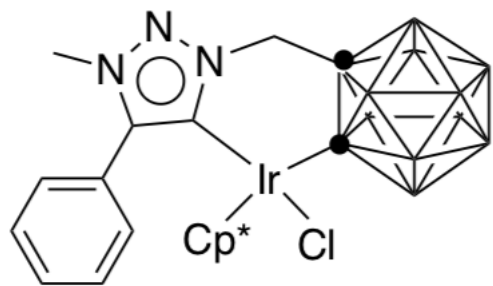

**6a**

**$^{11}\text{B}\{^1\text{H}\}$  NMR (160 MHz,  $d_6$ -acetone)**

~ -2.8  
~ -5.0  
~ -7.7  
~ -10.0  
~ -10.4  
~ -12.2

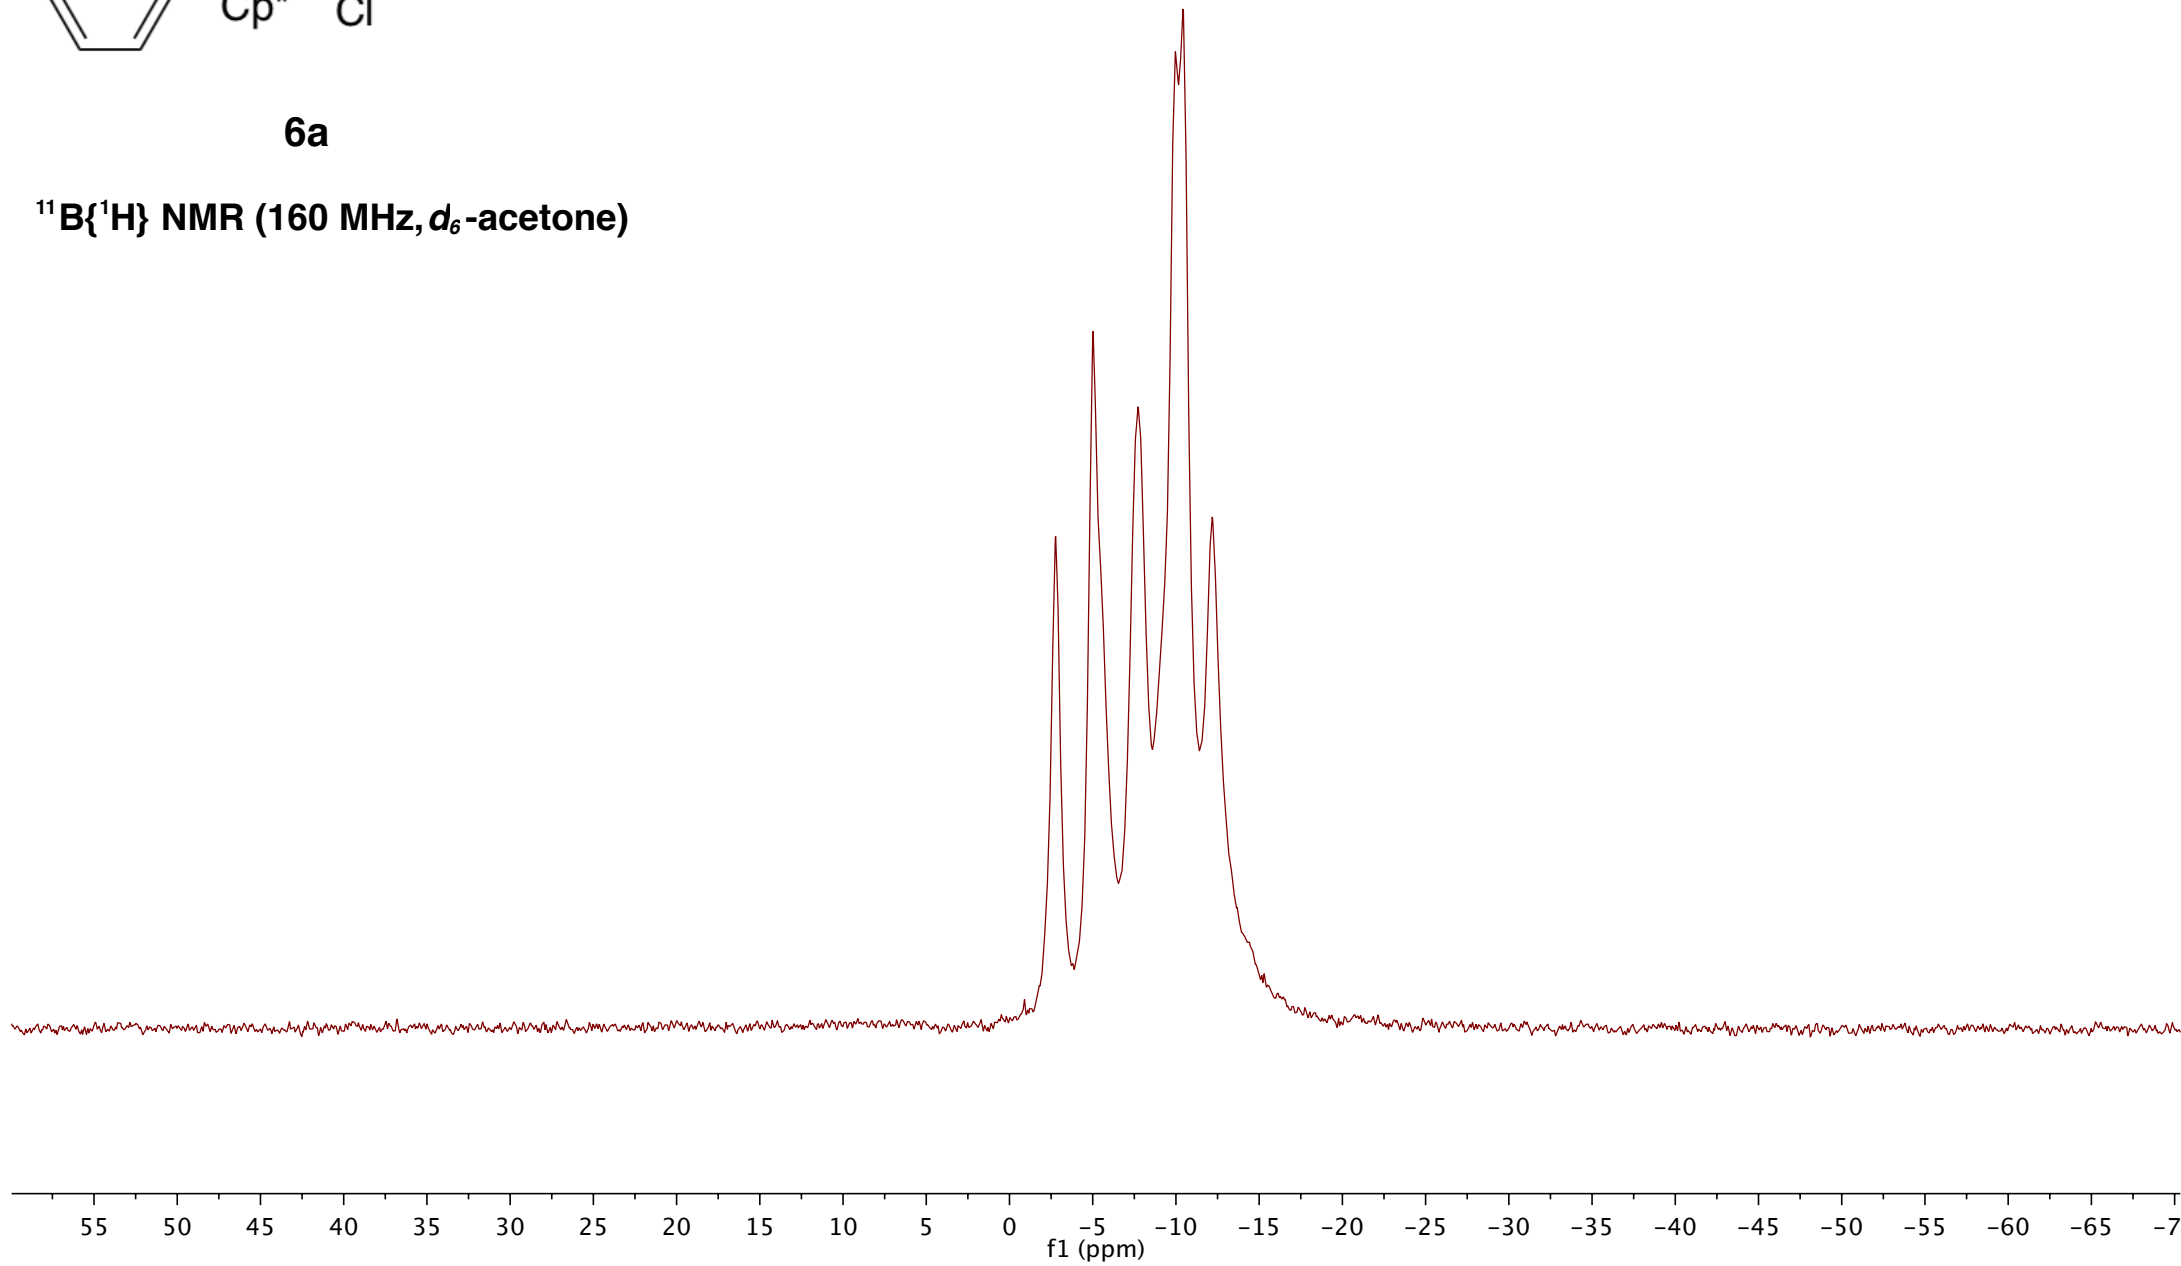

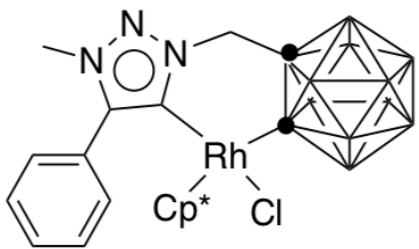

**6b**

**<sup>1</sup>H NMR (500 MHz, d<sub>6</sub>-acetone)**

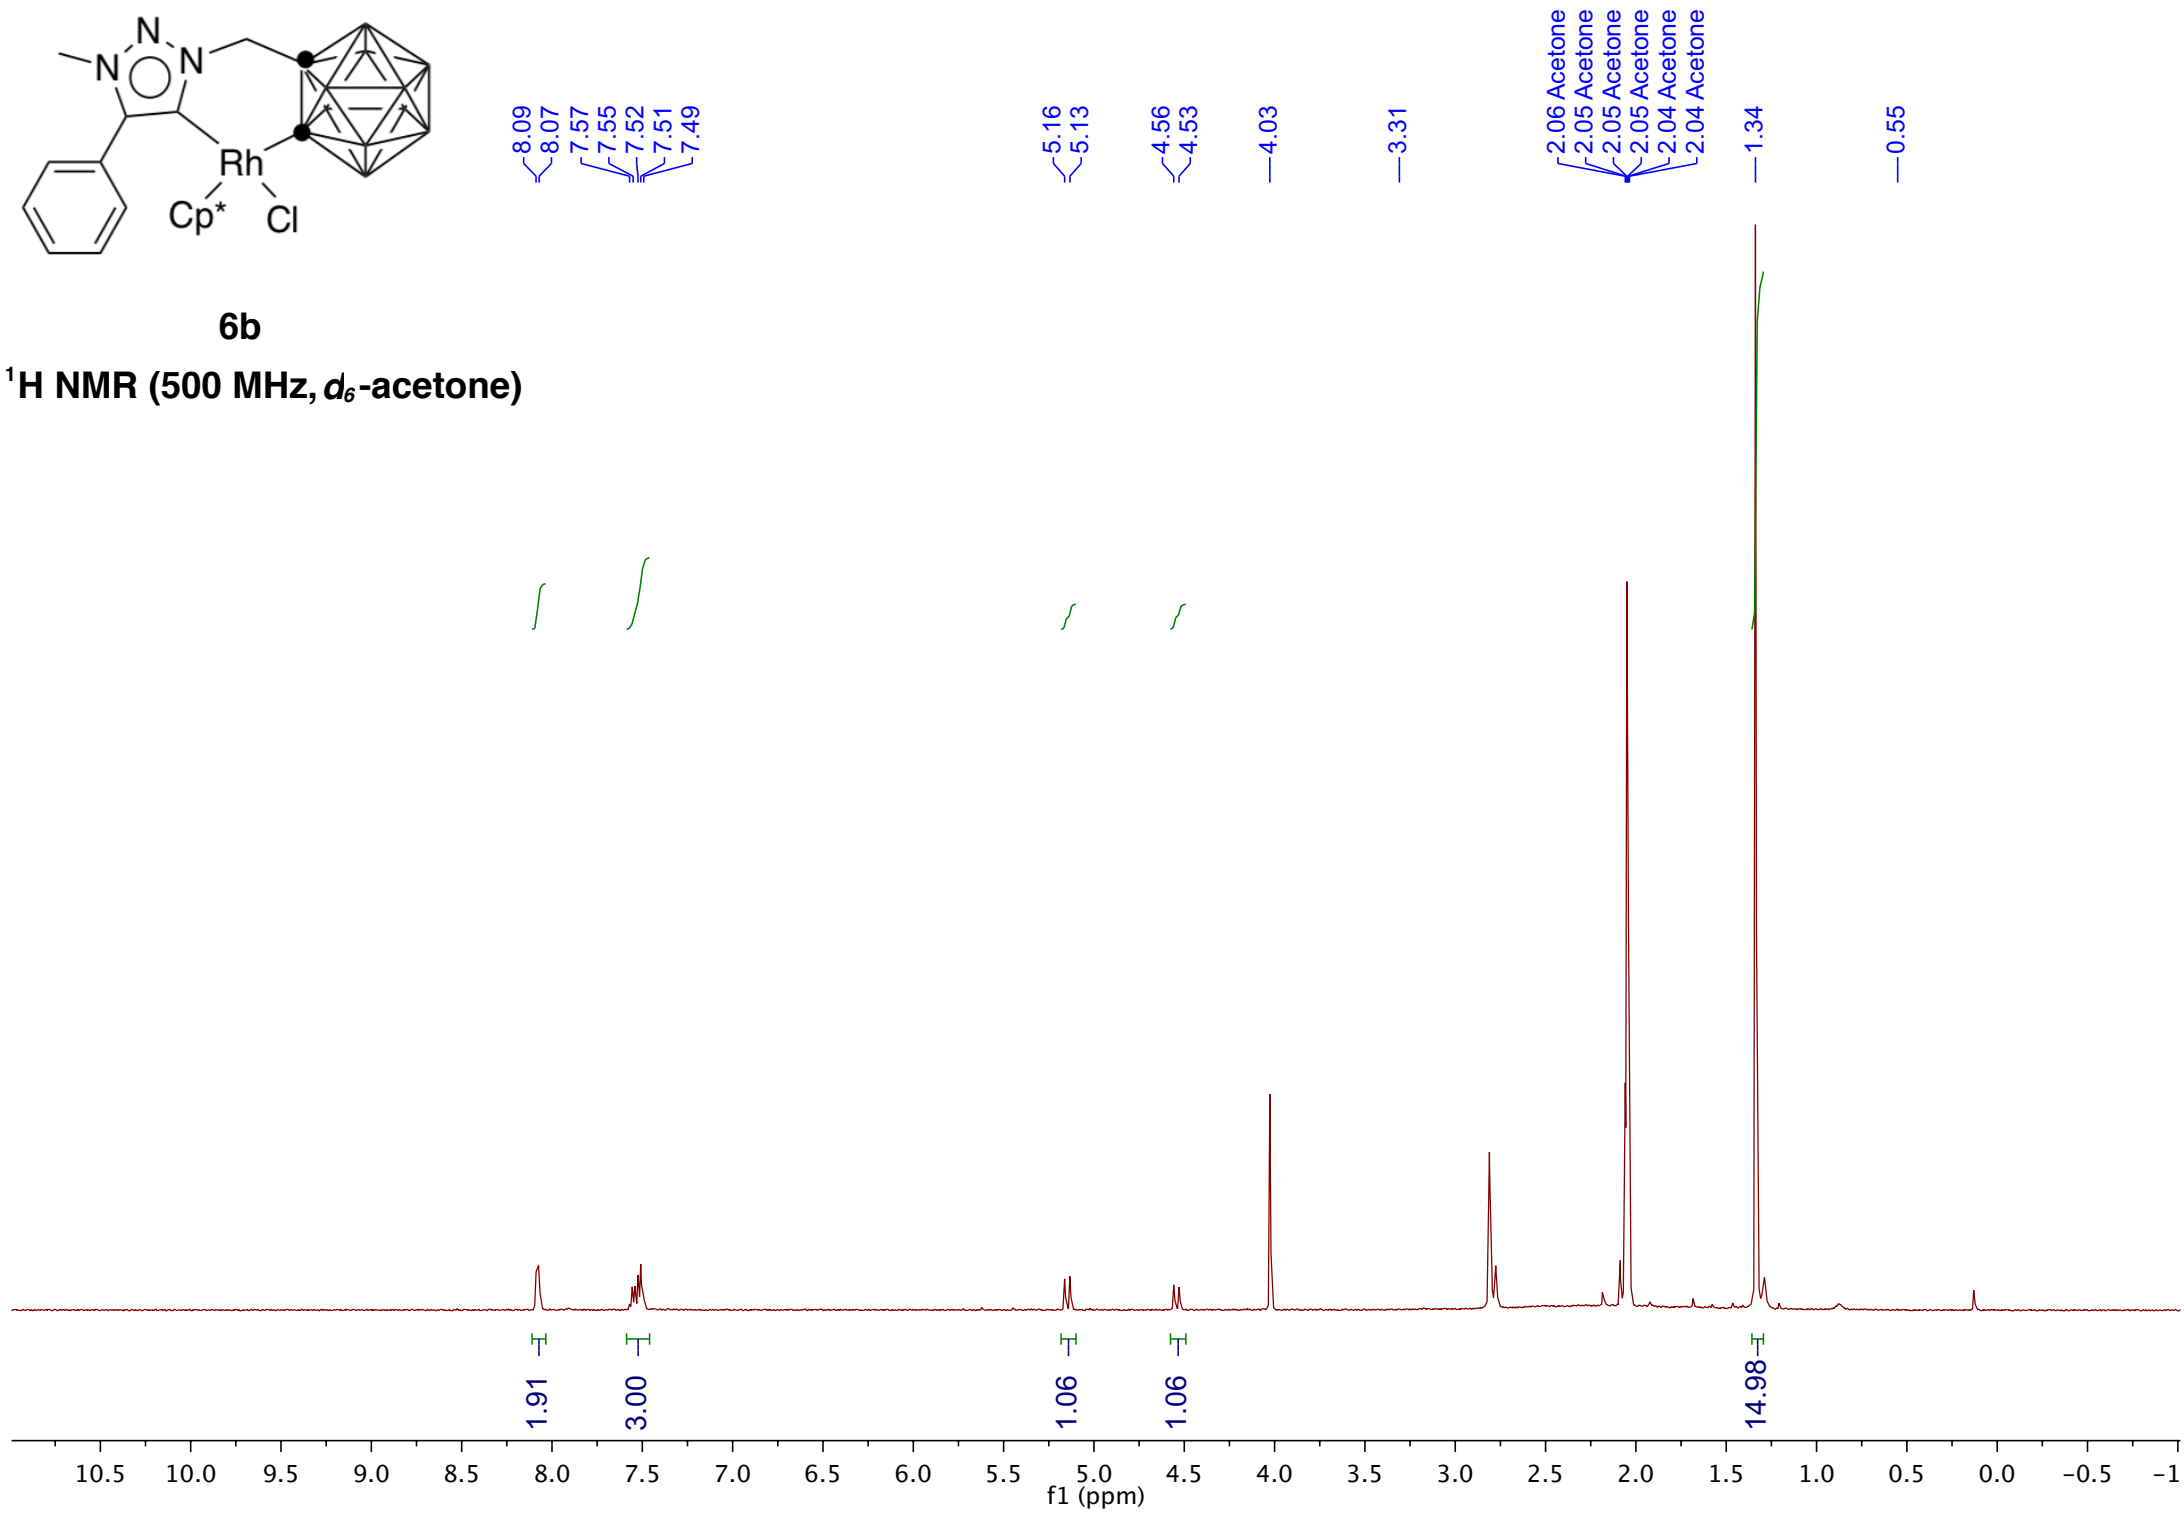

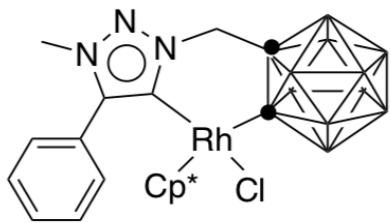

6b

$^{13}\text{C}\{^1\text{H}\}$  NMR (125 MHz,  $d_6$ -acetone)

206.1 Acetone

160.2  
159.8

149.9

134.0  
130.7  
128.5  
127.9

99.0  
98.9

74.6

67.7

58.9

38.2  
30.3 Acetone  
30.1 Acetone  
30.0 Acetone  
29.8 (CD3)2CO  
29.7 Acetone  
29.5 Acetone  
29.4 Acetone

9.4

220 210 200 190 180 170 160 150 140 130 120 110 100 90 80 70 60 50 40 30 20 10 0

f1 (ppm)

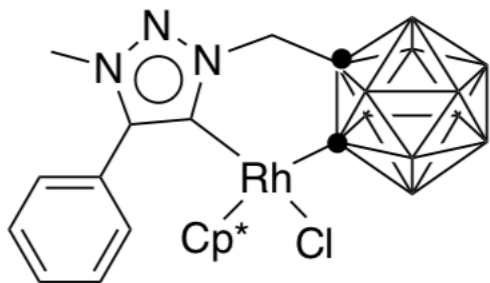

**6b**

**$^{11}\text{B}\{^1\text{H}\}$  NMR (160 MHz,  $d_6$ -acetone)**

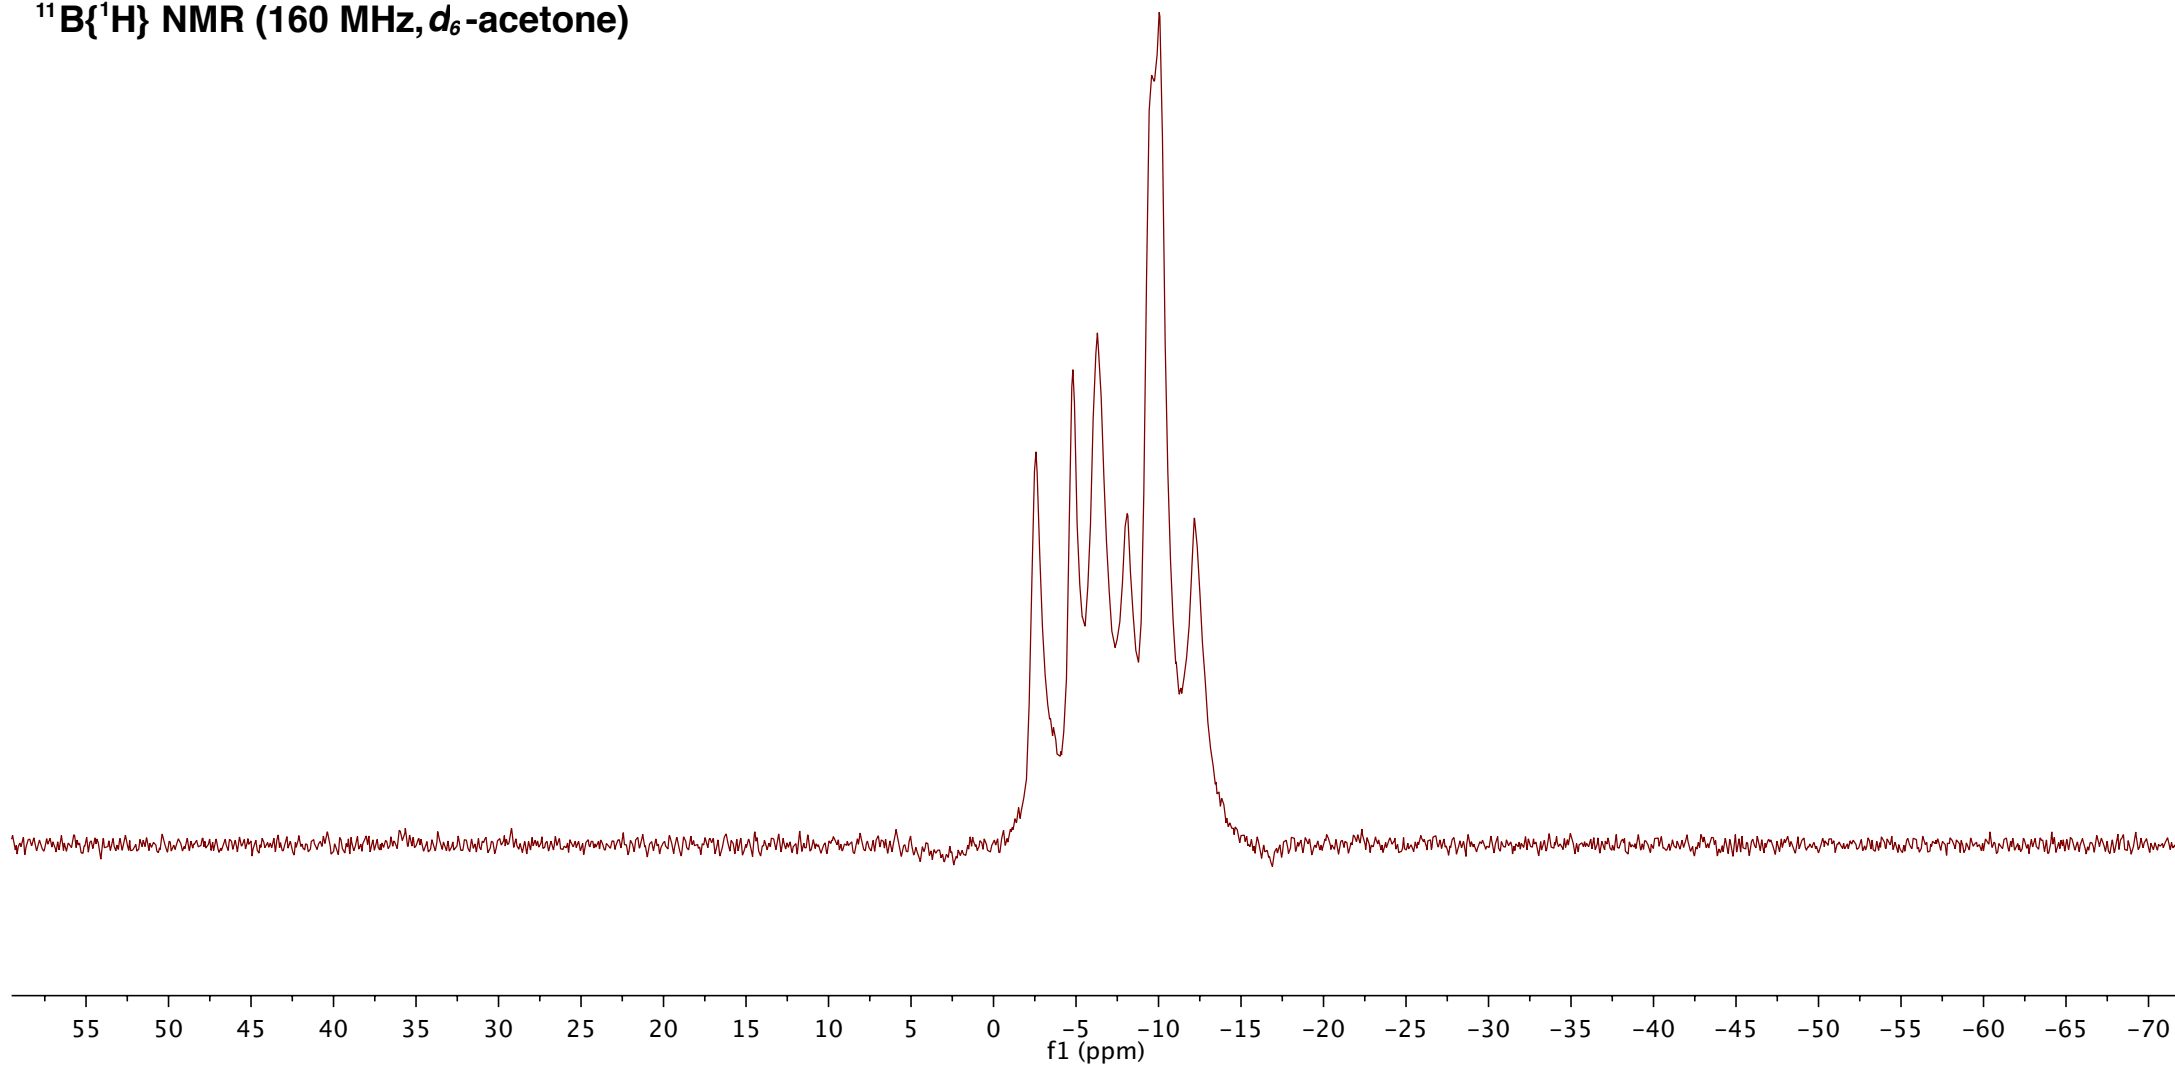

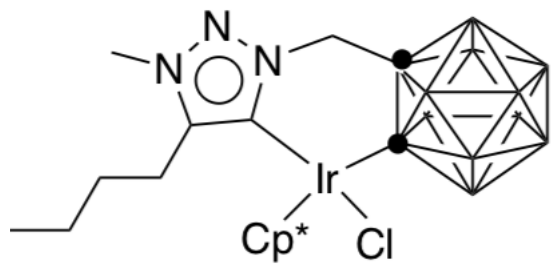

— 7.26 CDCl<sub>3</sub>

**6c**

<sup>1</sup>H NMR (500 MHz, CDCl<sub>3</sub>)

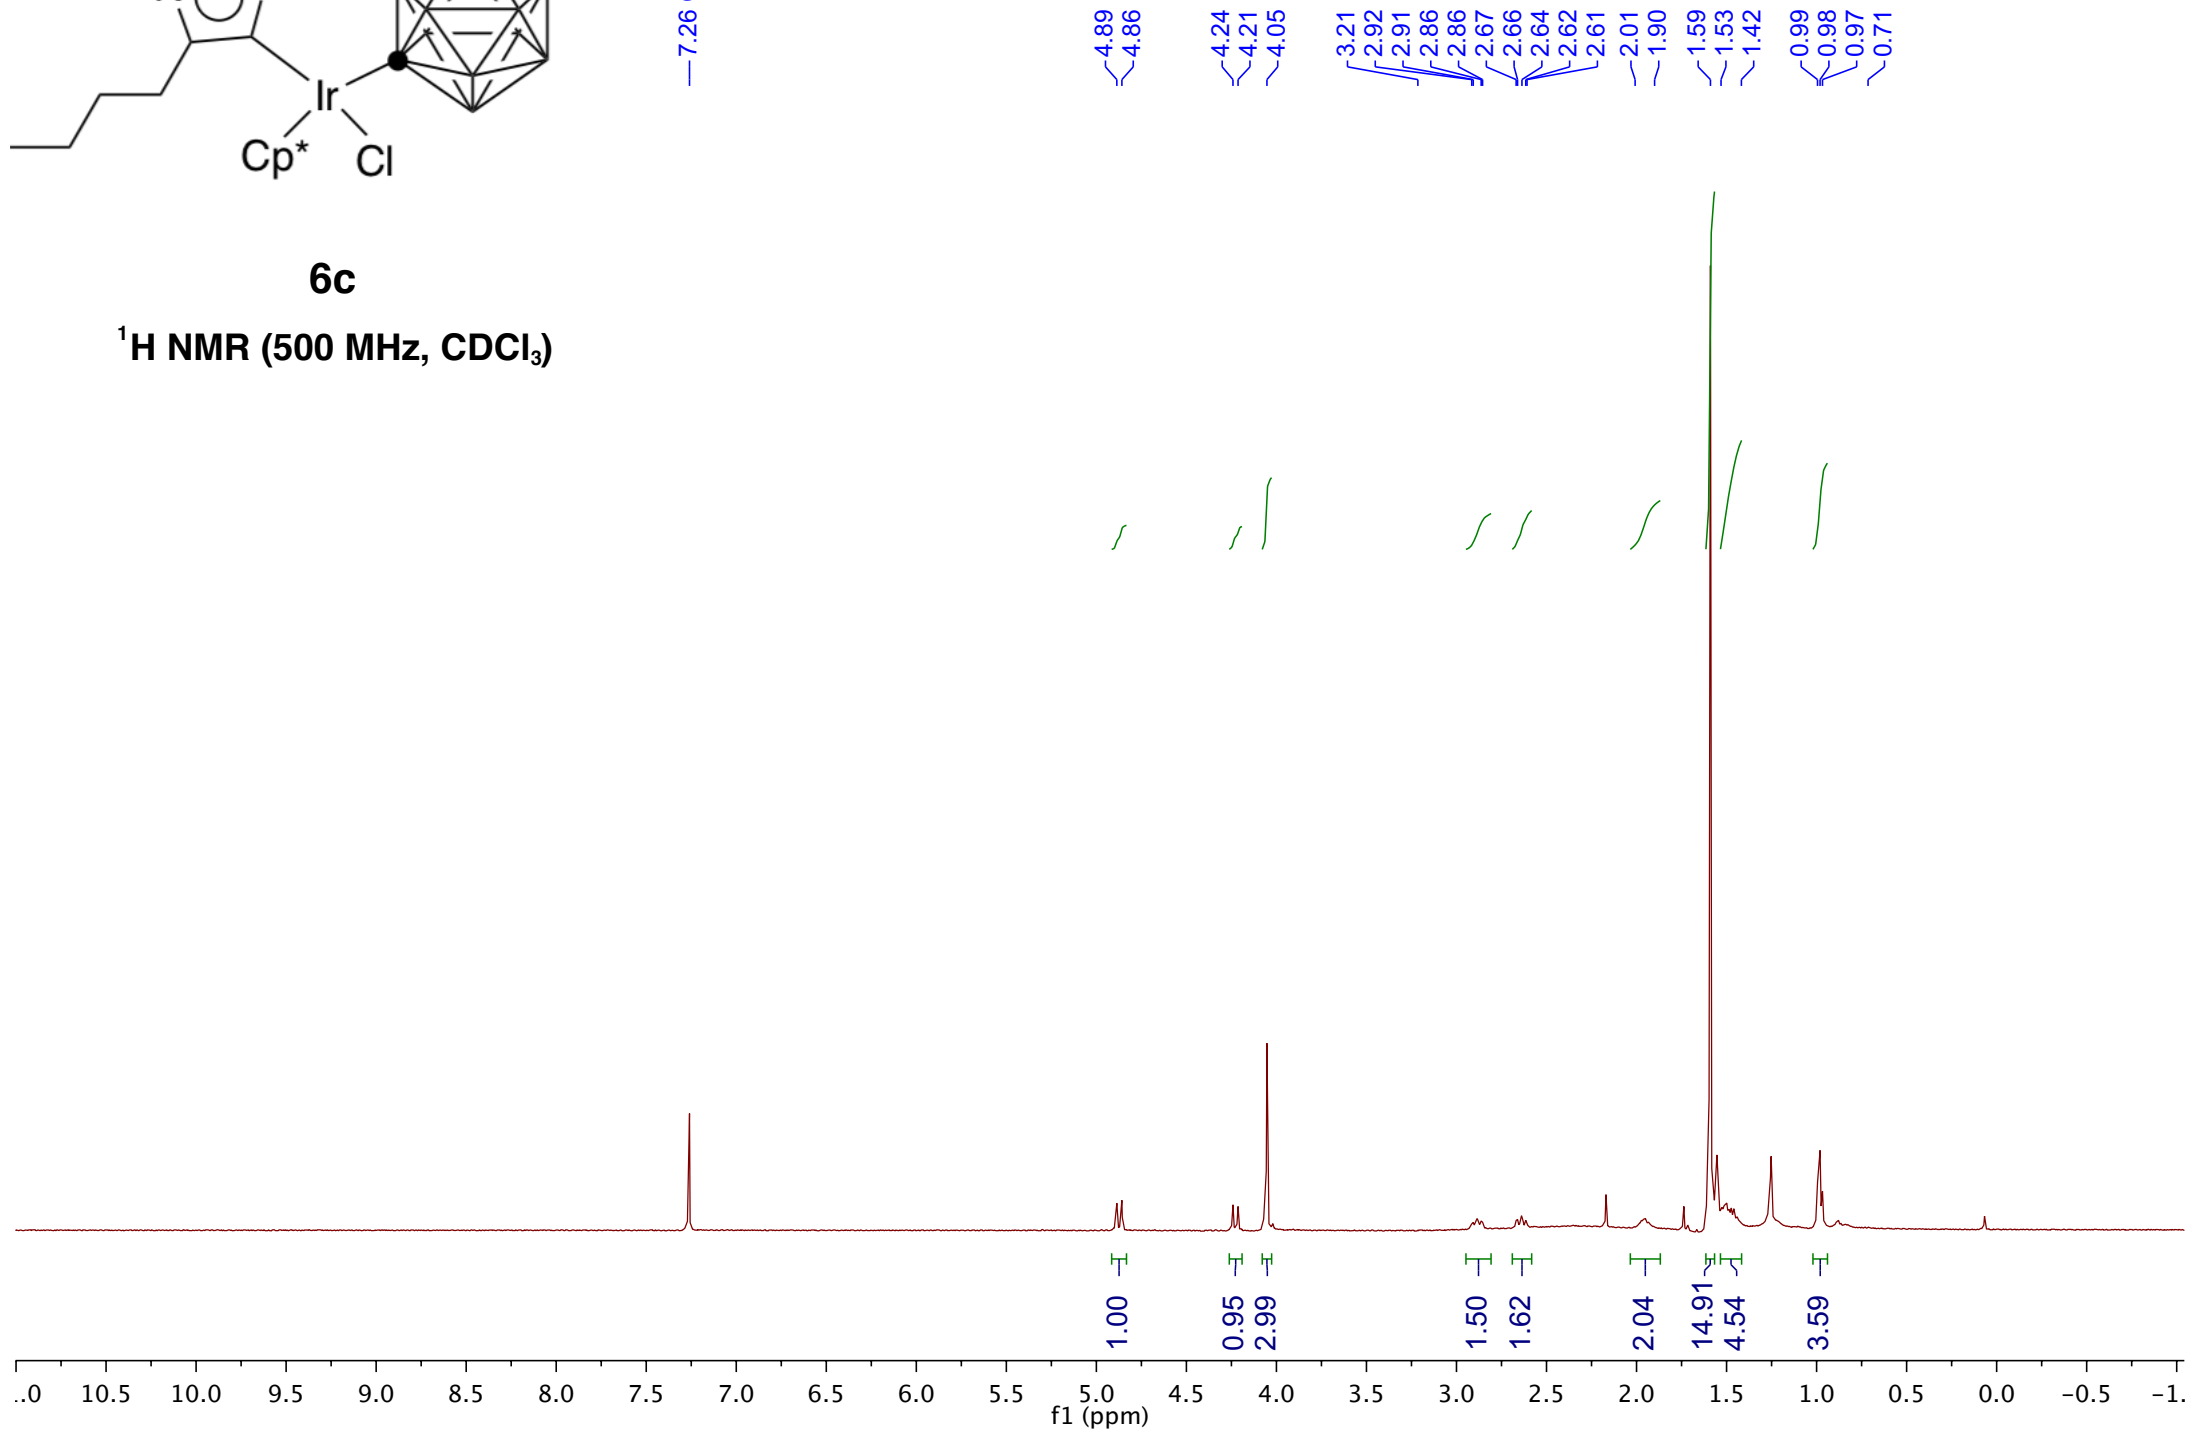



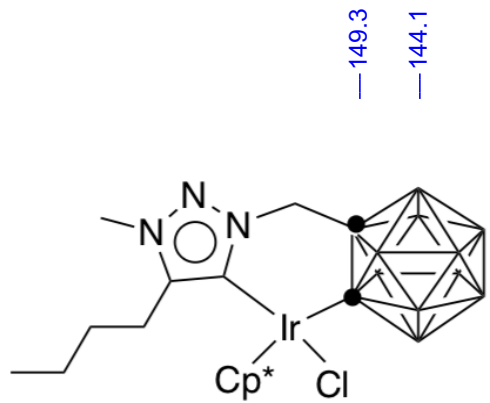

**6c**

$^{13}\text{C}\{^1\text{H}\}$  NMR (125 MHz,  $\text{CDCl}_3$ )

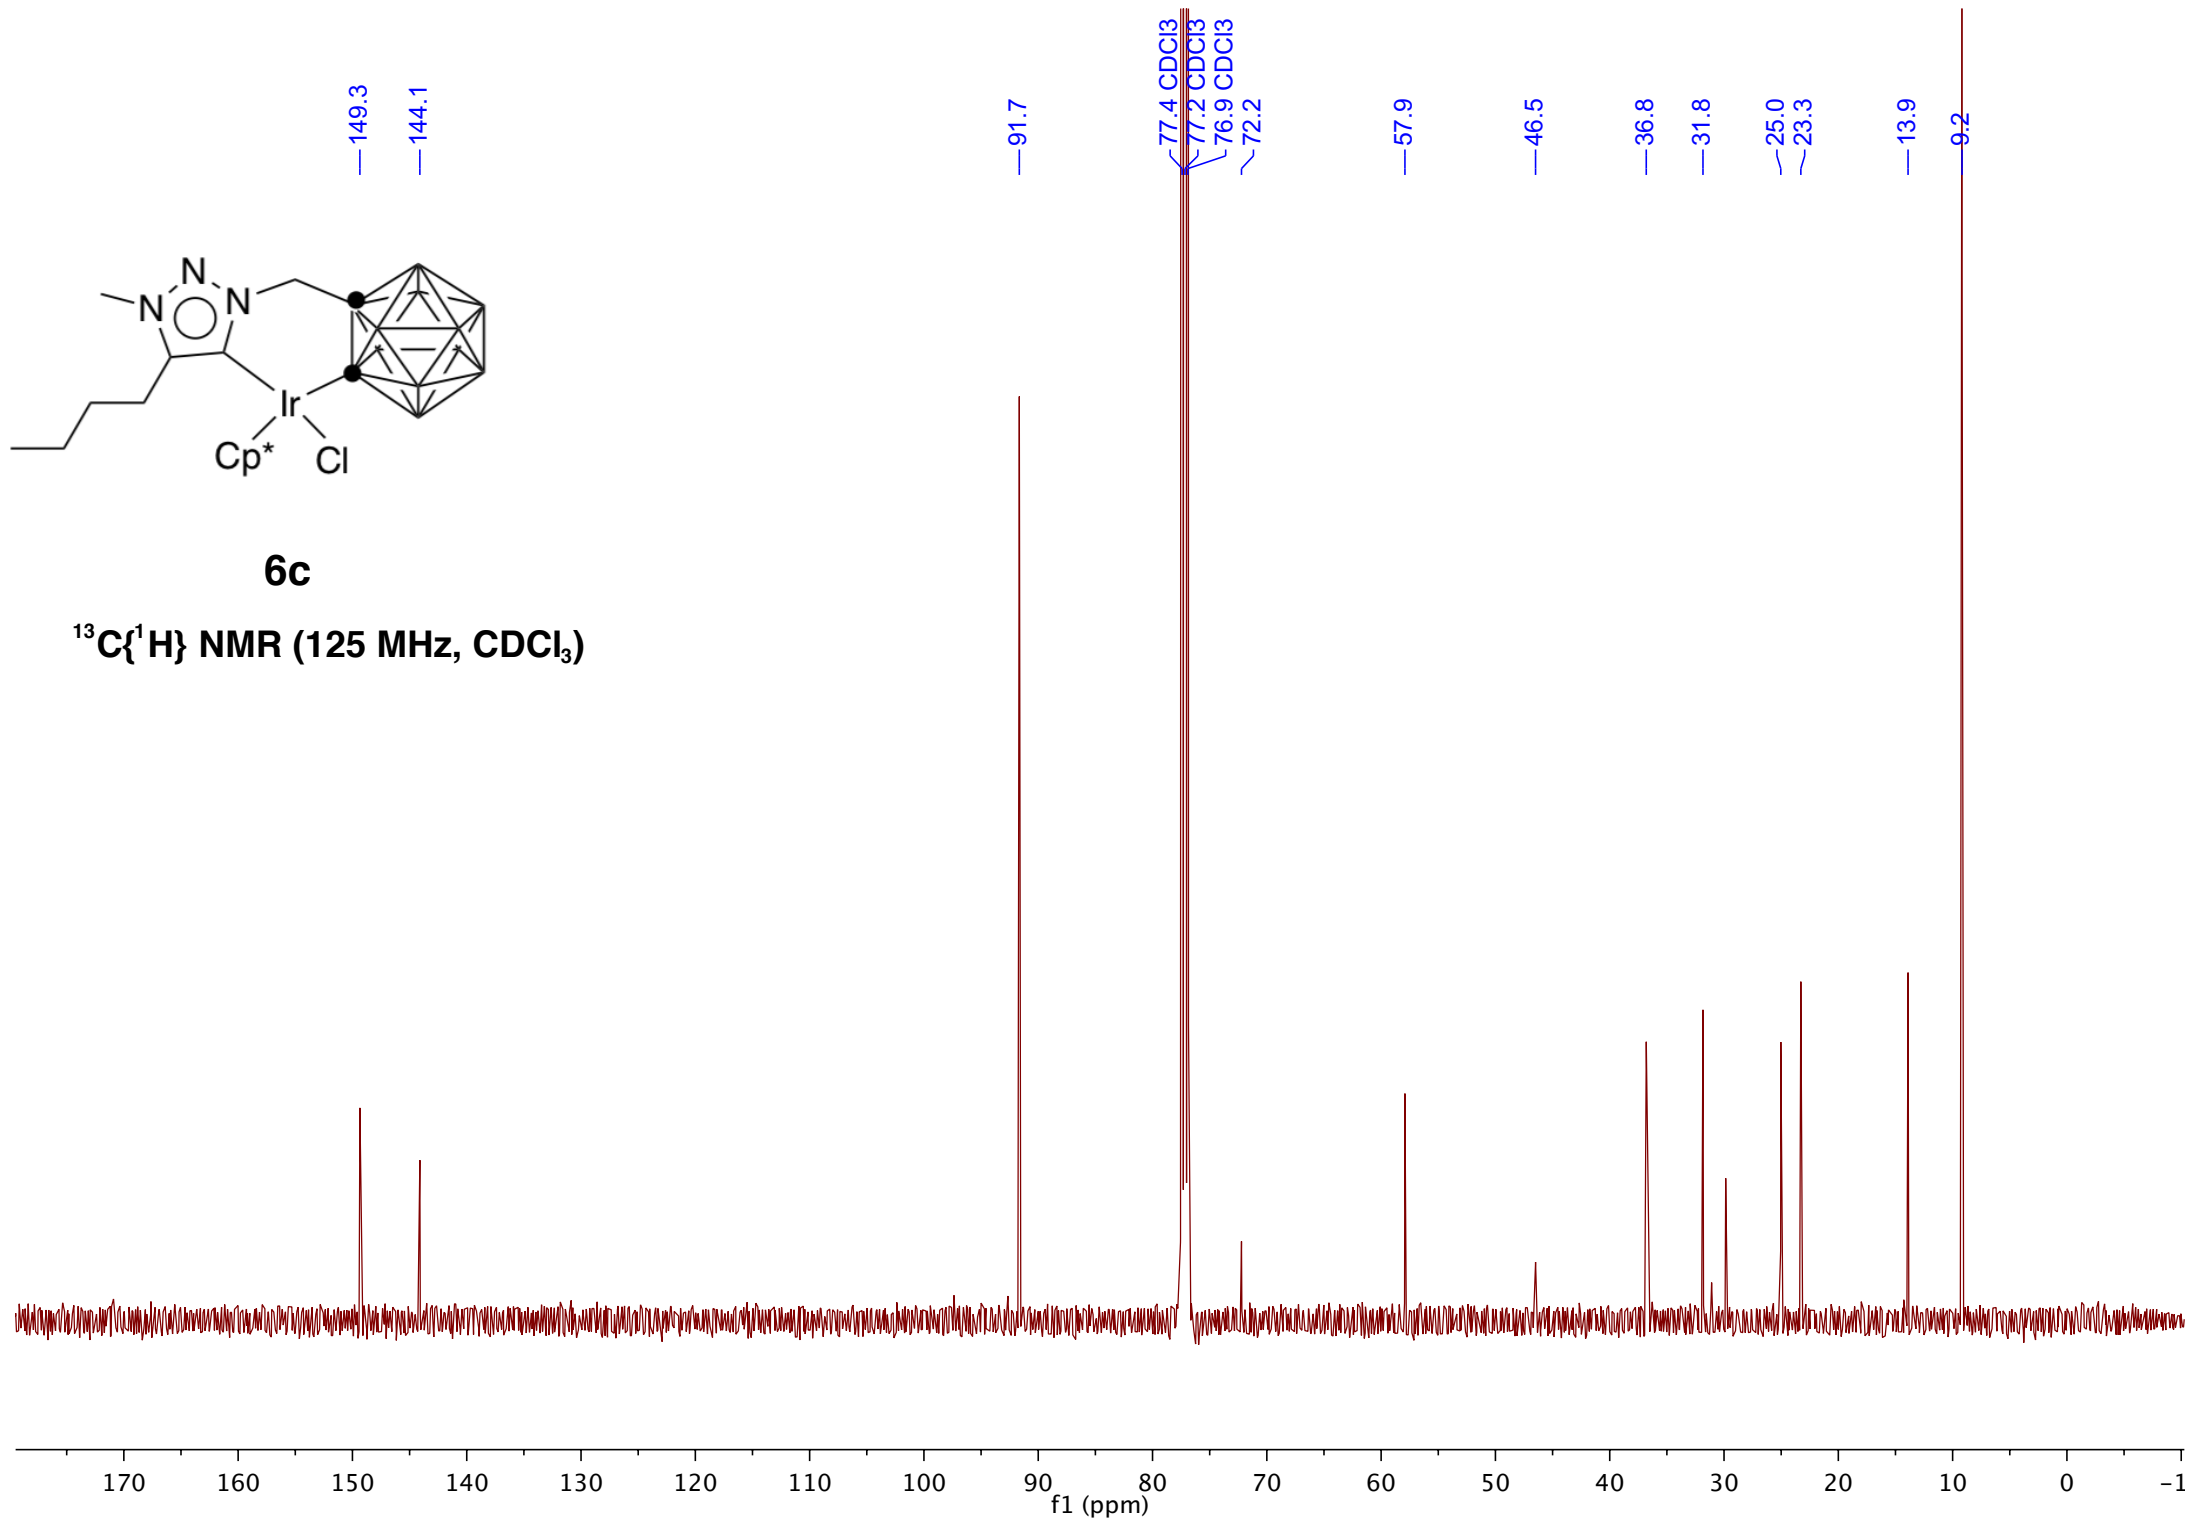

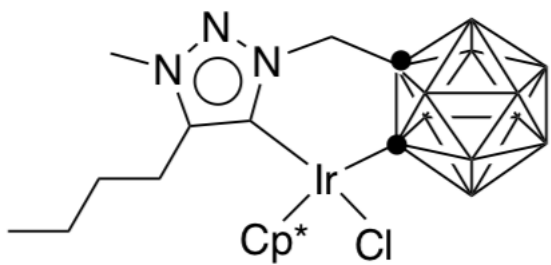

~2.6  
~4.5  
~5.6  
~7.8  
~10.0  
~12.3

**6c**

**$^{11}\text{B}\{^1\text{H}\}$  NMR (160 MHz,  $\text{CDCl}_3$ )**

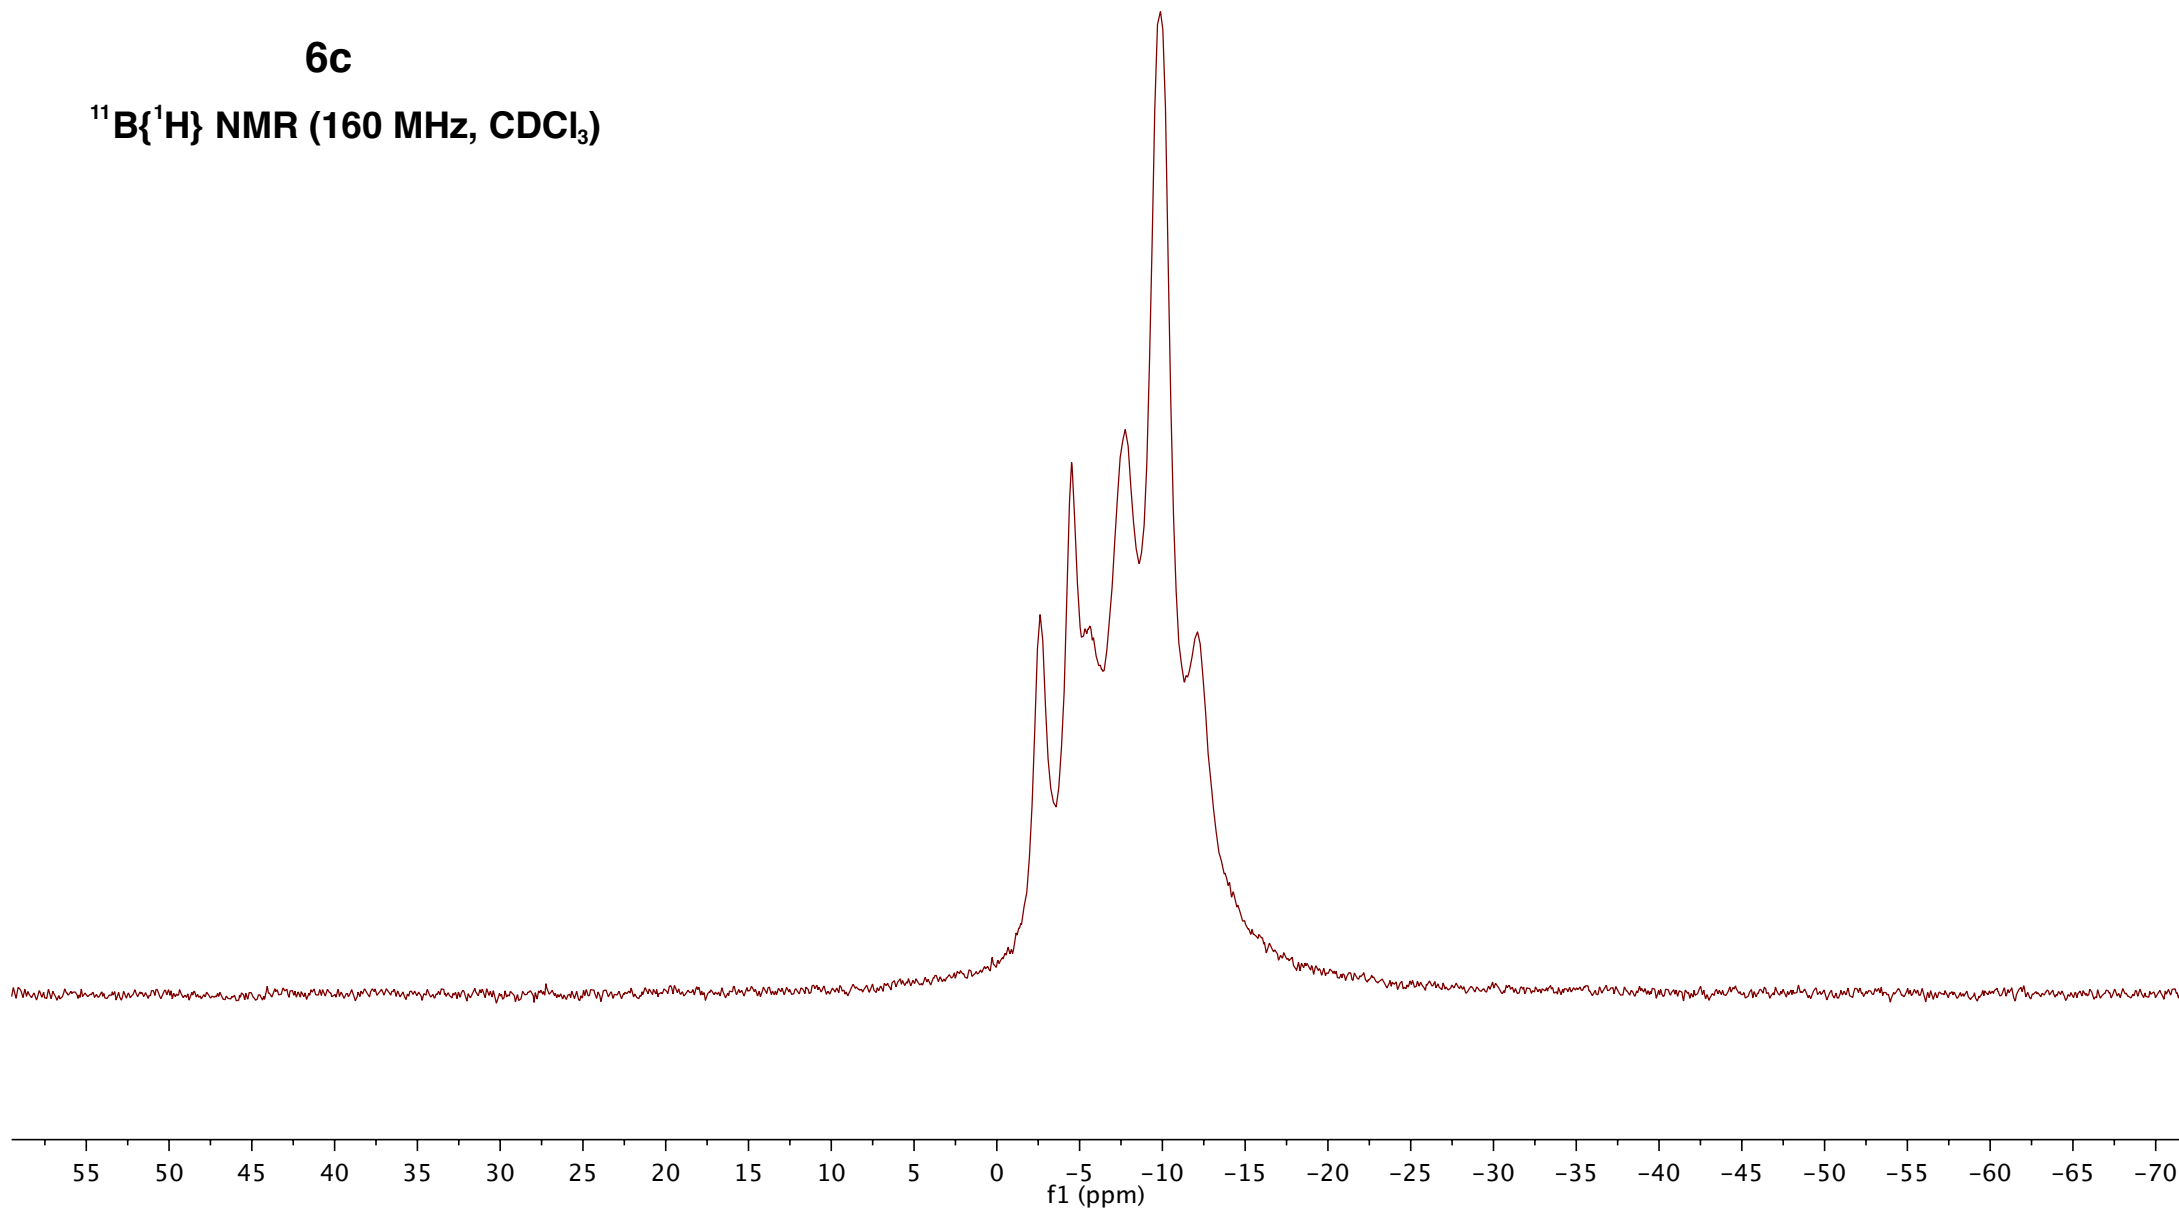

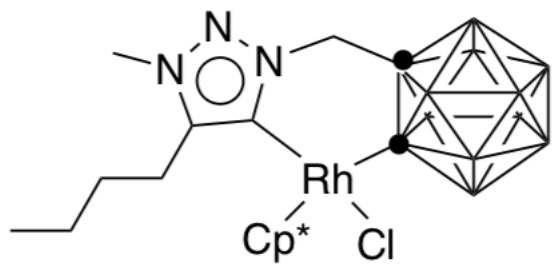

— 7.26 CDCl<sub>3</sub>

**6d**  
<sup>1</sup>H NMR (300 MHz, CDCl<sub>3</sub>)

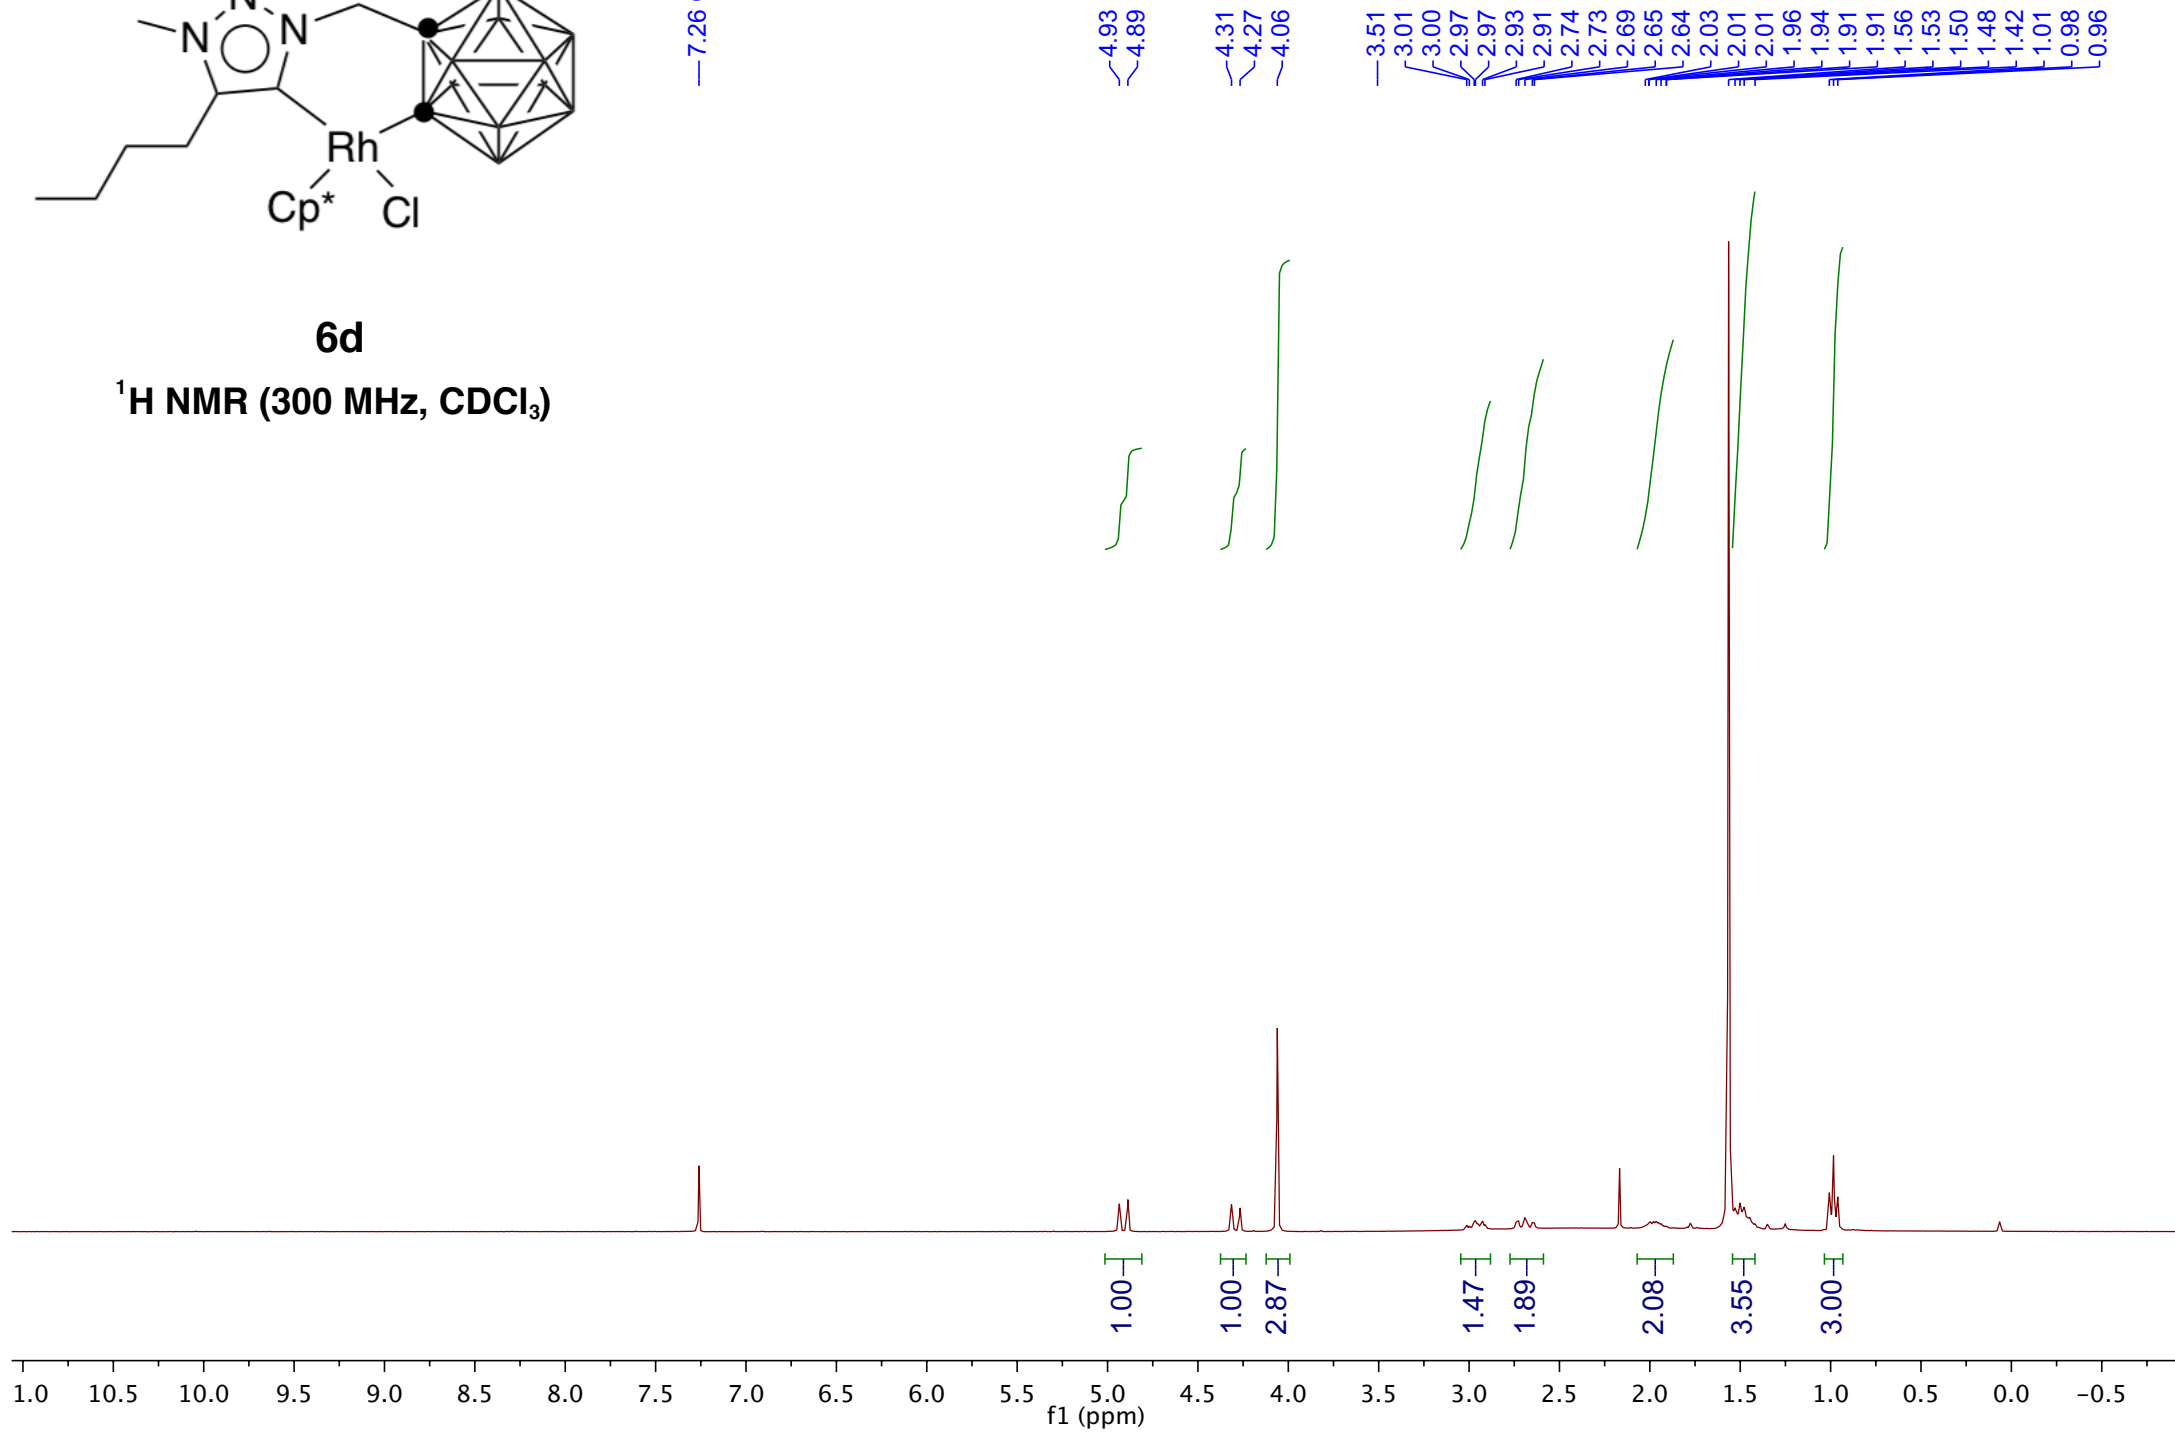

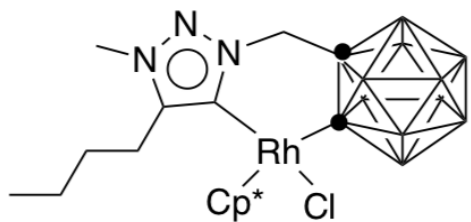

**6d**

$^{13}\text{C}\{^1\text{H}\}$  NMR (75 MHz,  $\text{CDCl}_3$ )

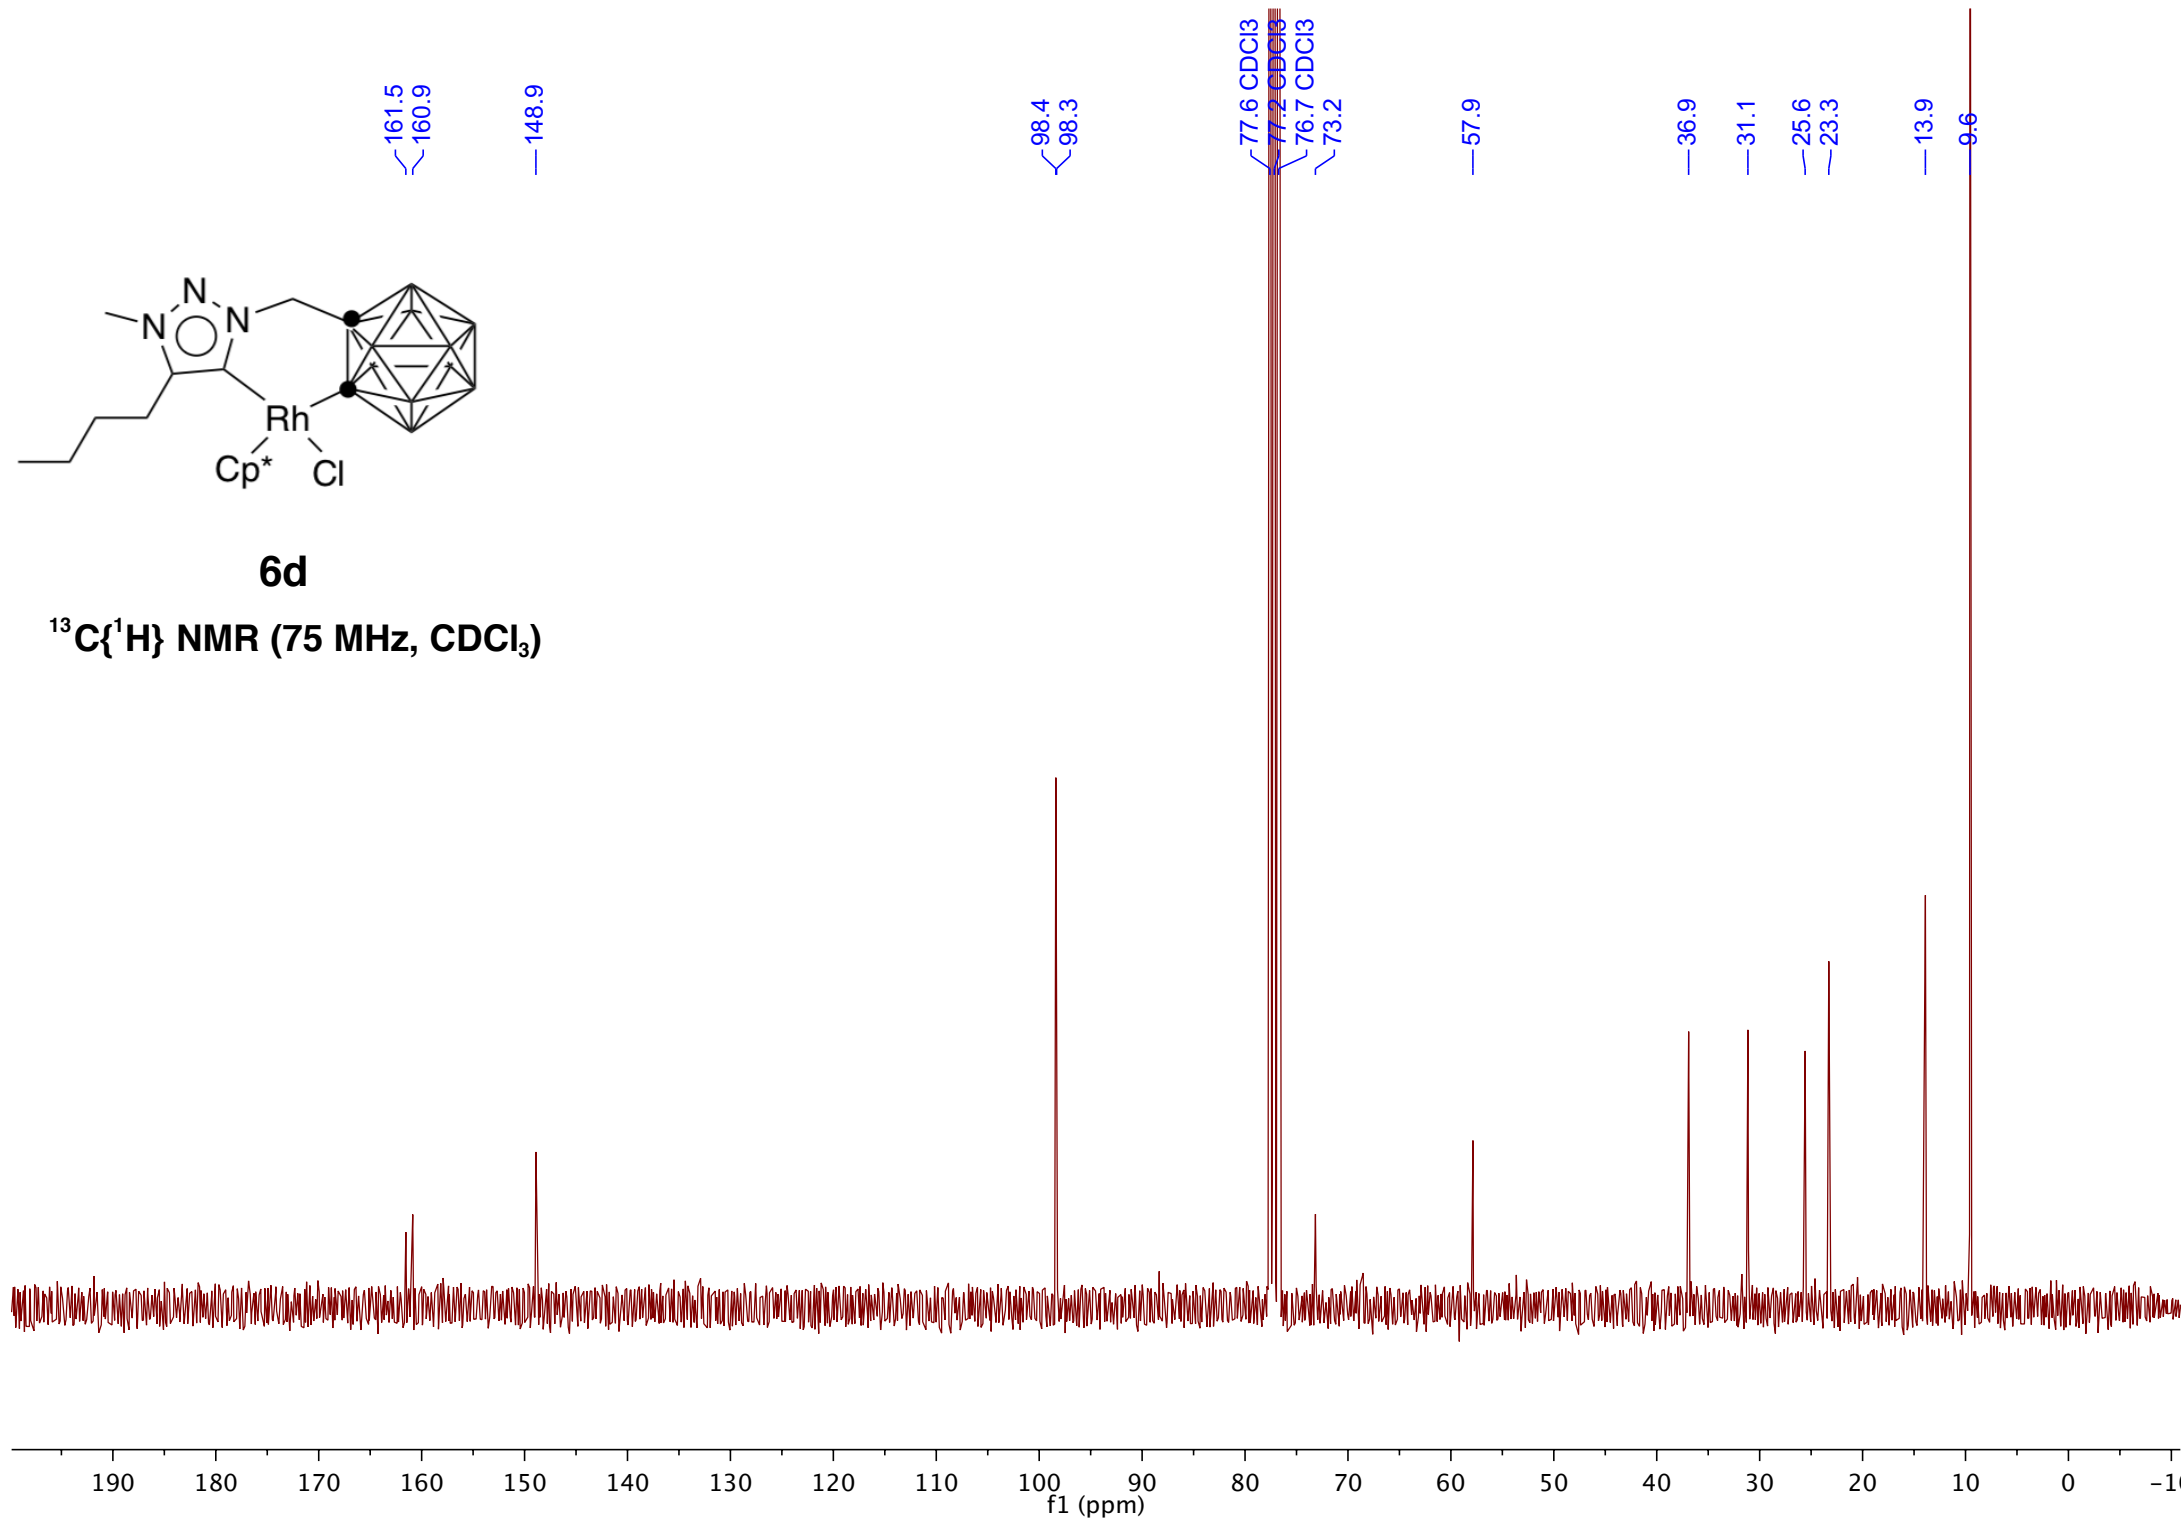

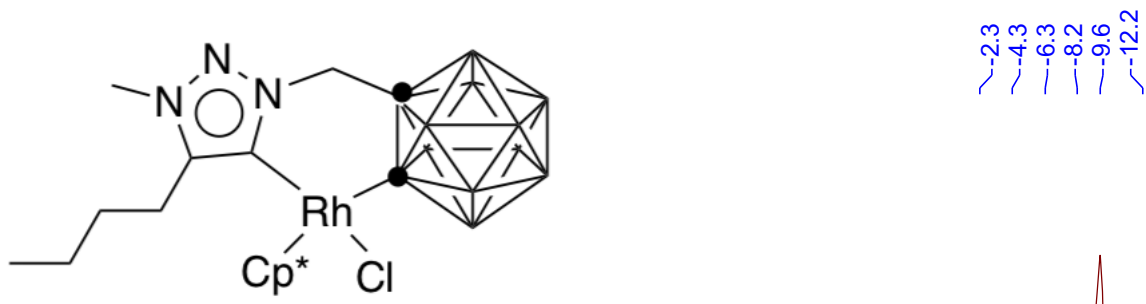

**6d**

**$^{11}\text{B}\{^1\text{H}\}$  NMR (160 MHz,  $d_6$ -acetone)**

~2.3  
~4.3  
~6.3  
~8.2  
~9.6  
~12.2

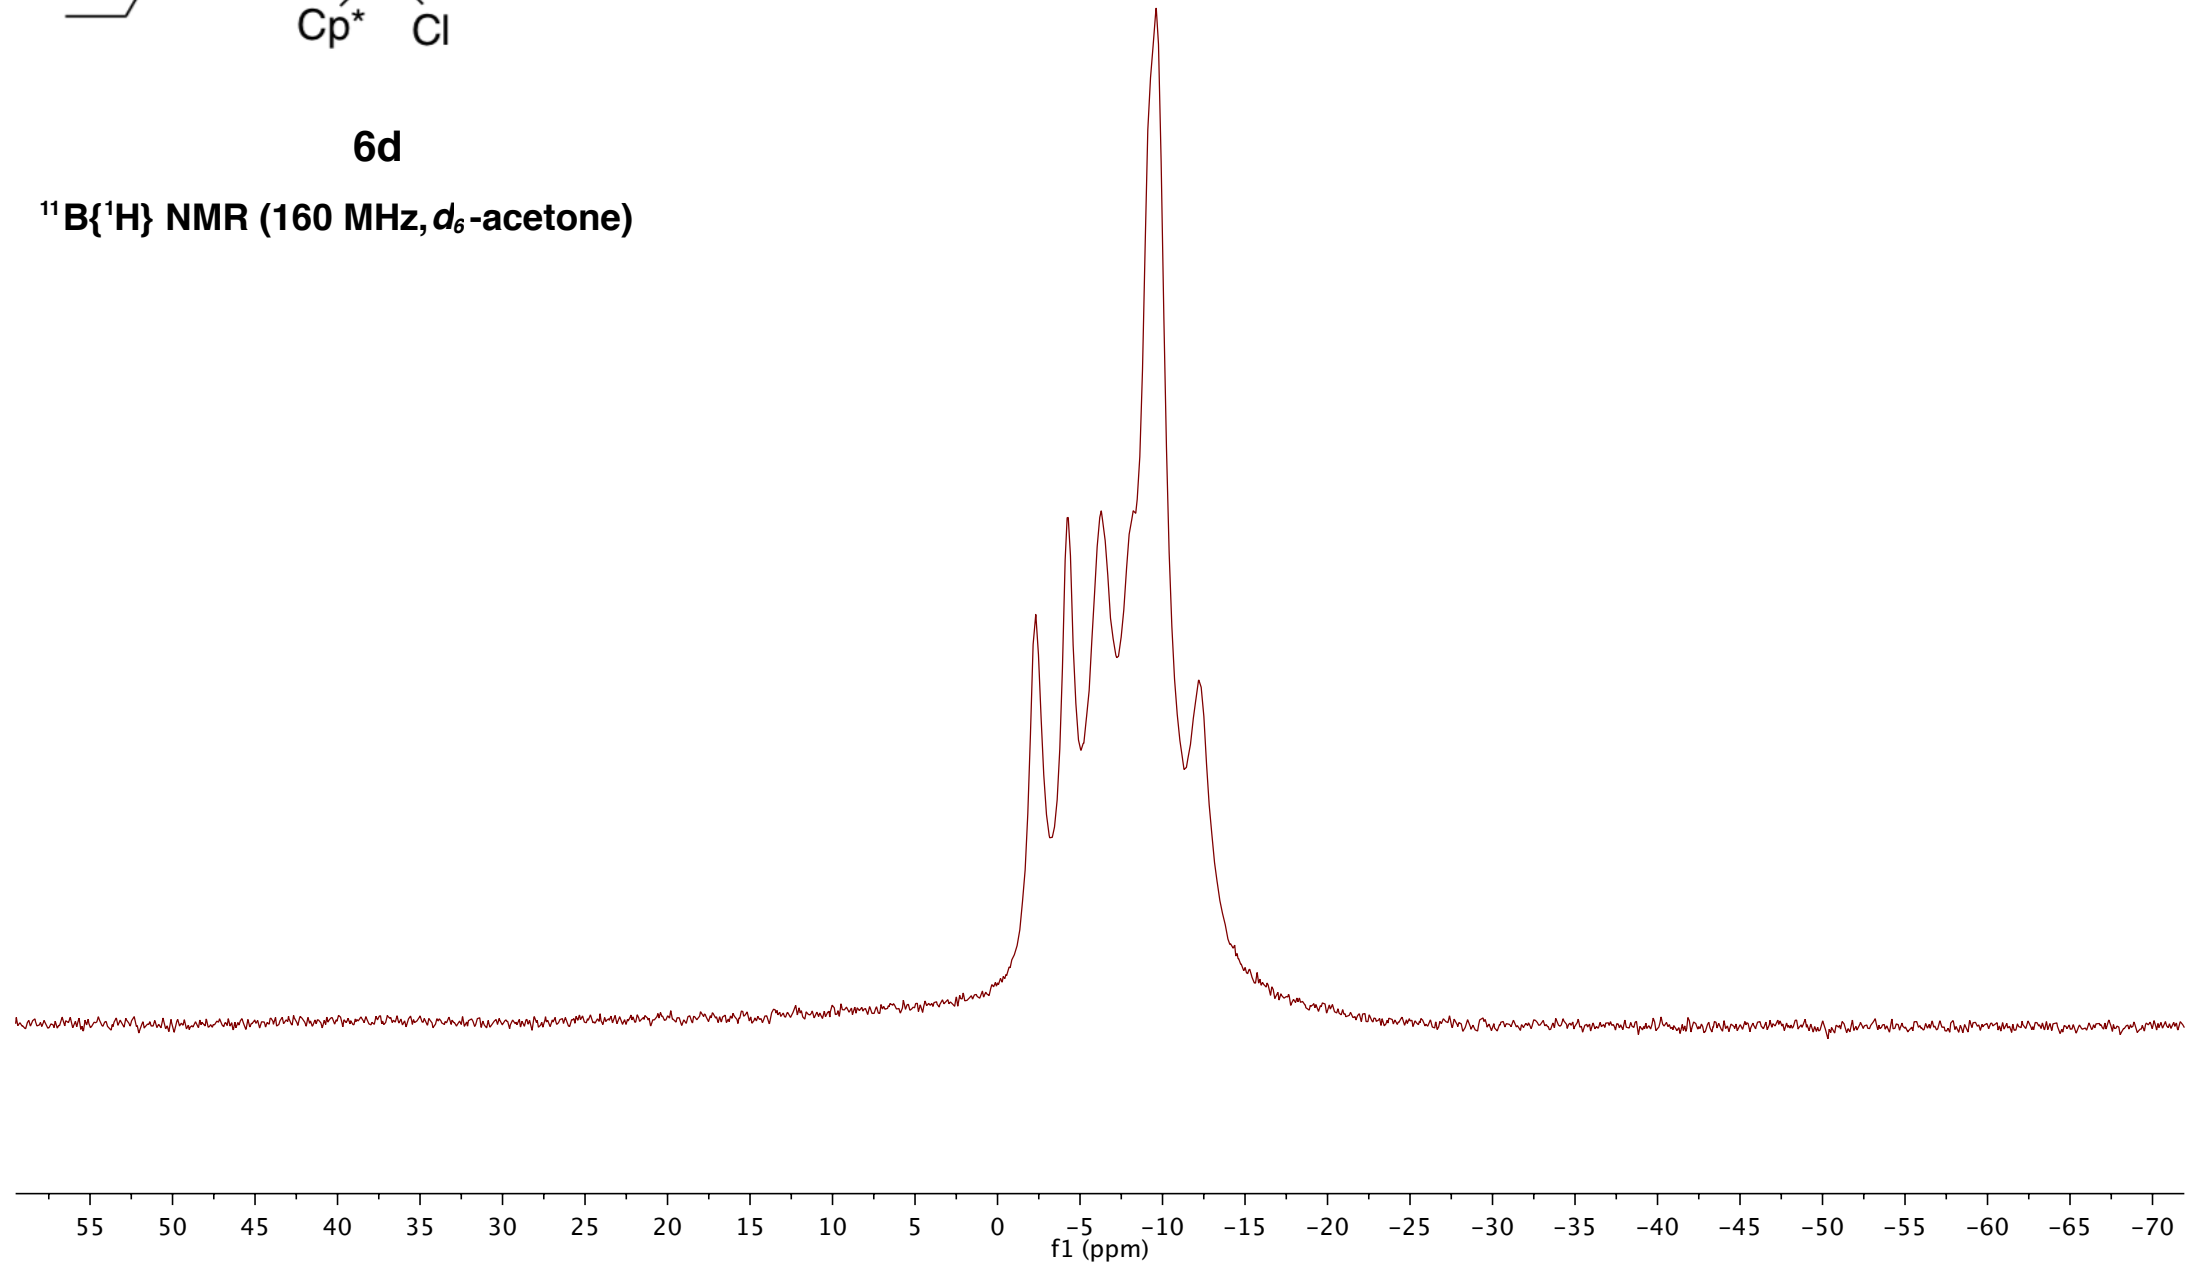

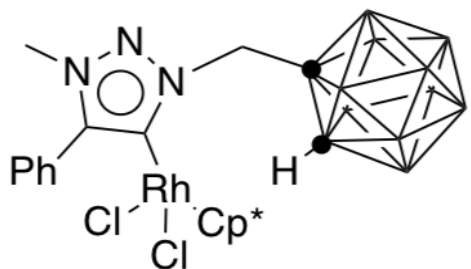

7

$^1\text{H}$  NMR (300 MHz,  $\text{CDCl}_3$ )

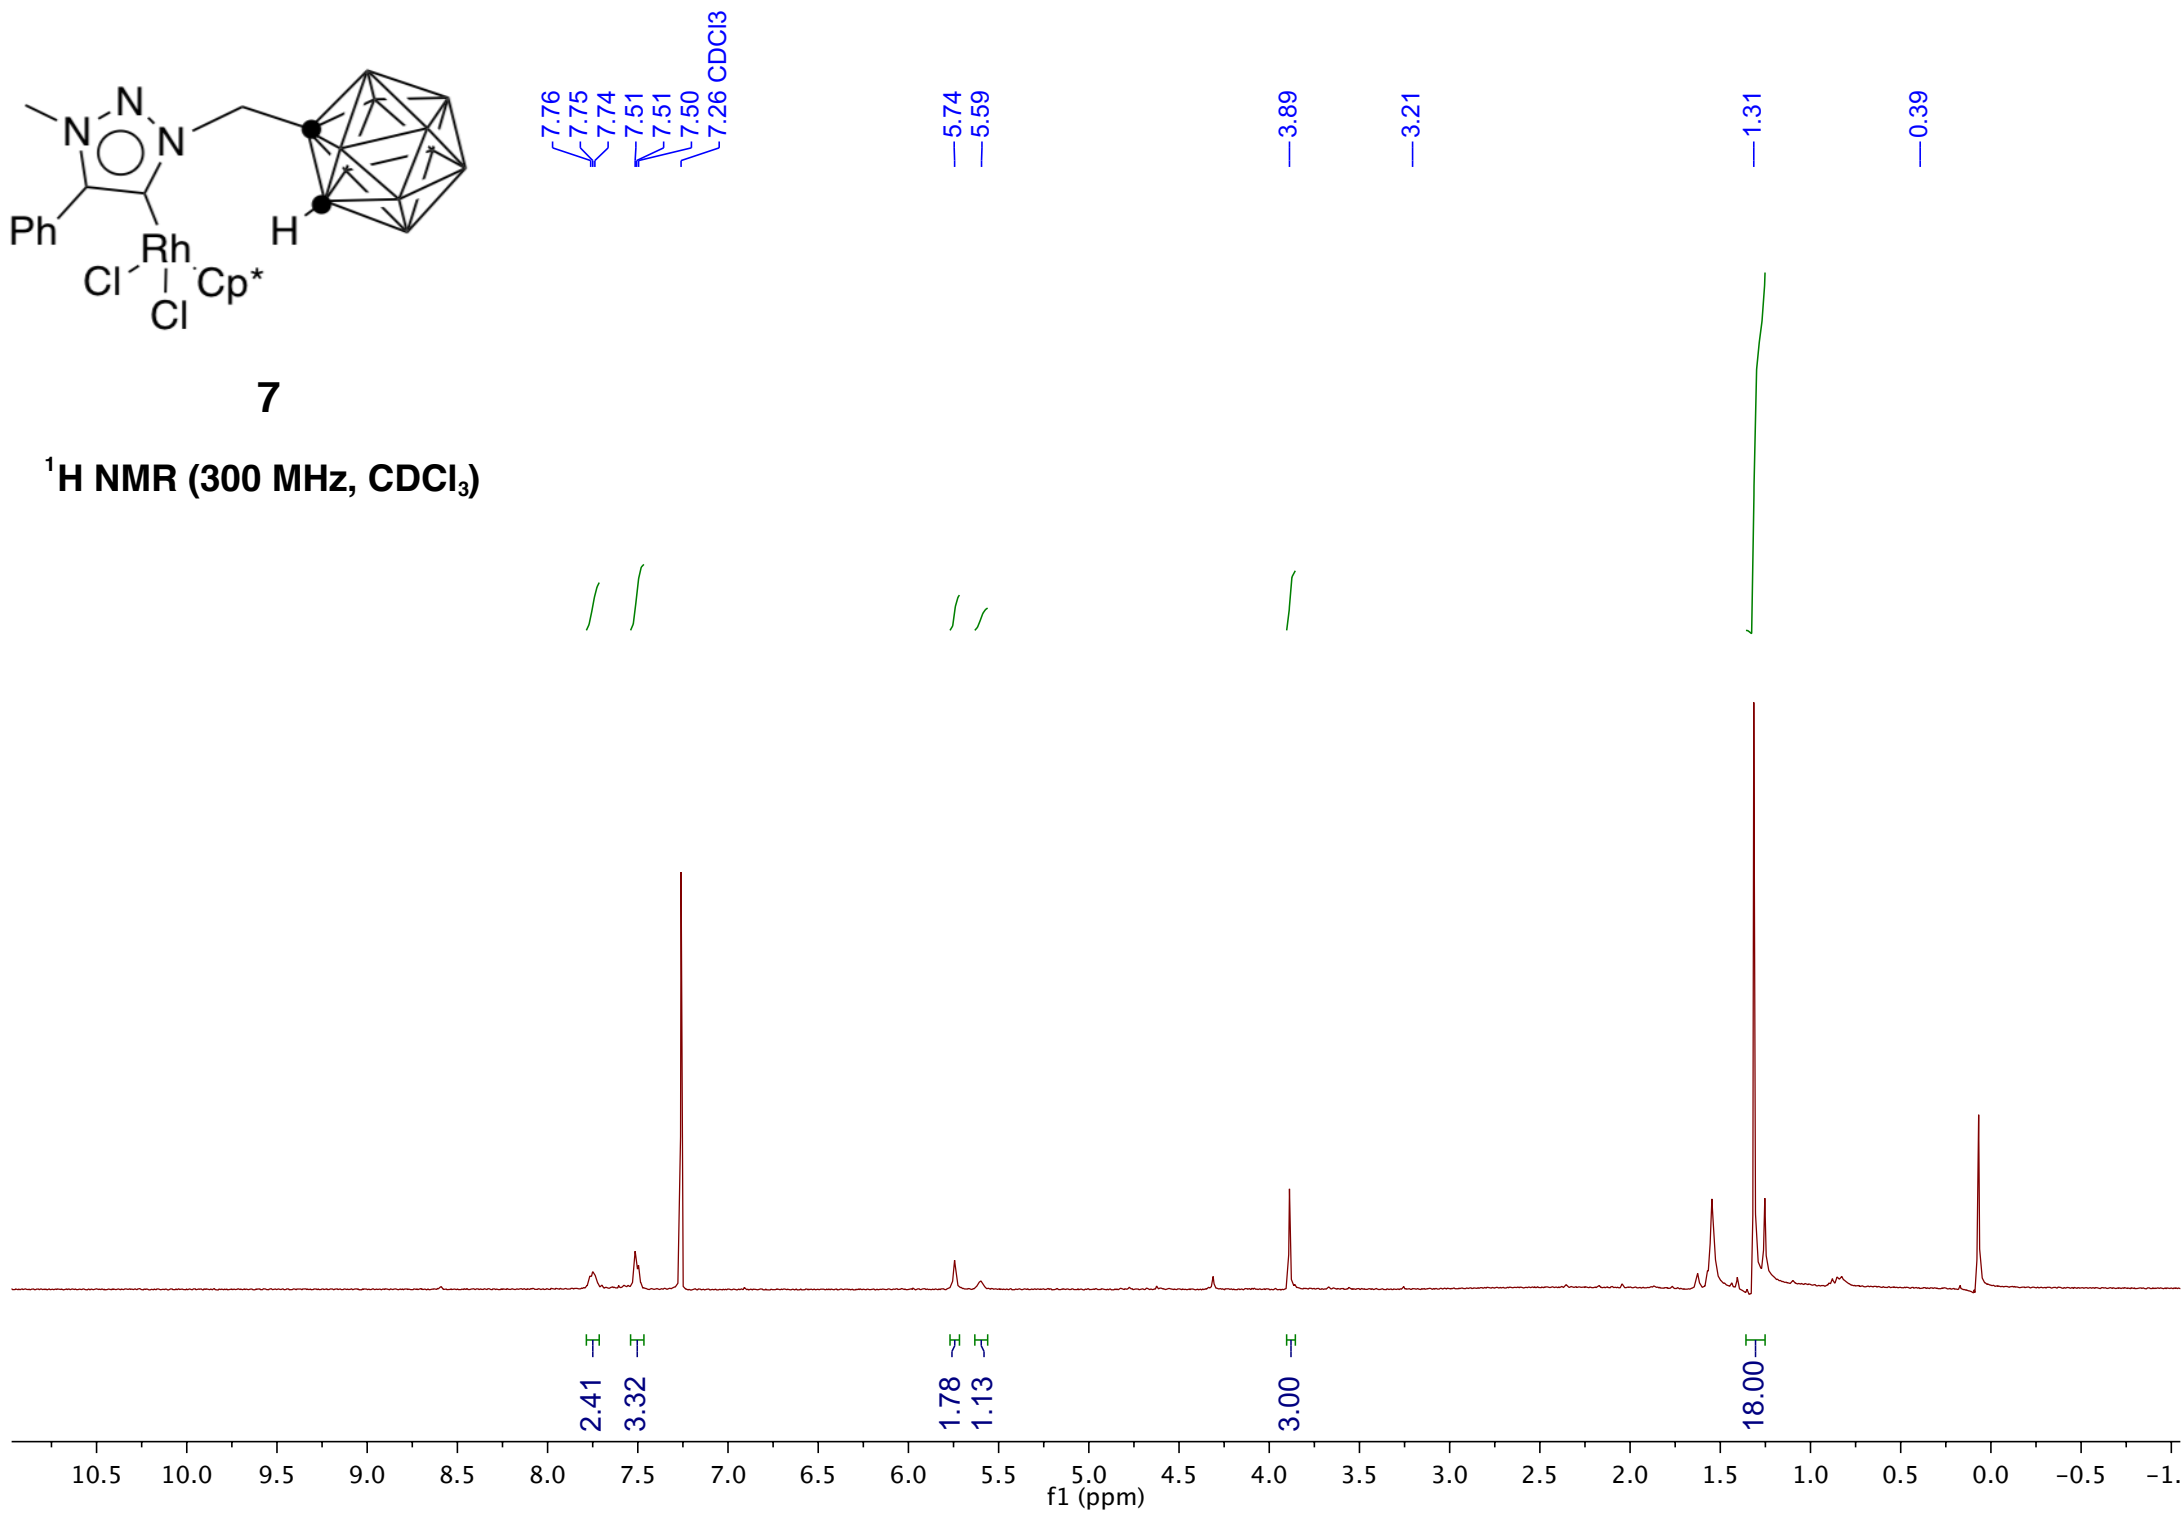

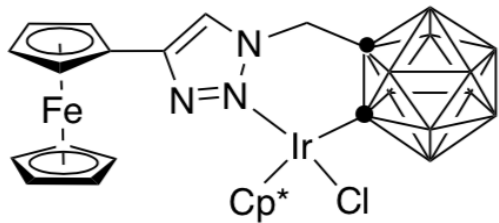

**8**

<sup>1</sup>H NMR (300 MHz, CDCl<sub>3</sub>)

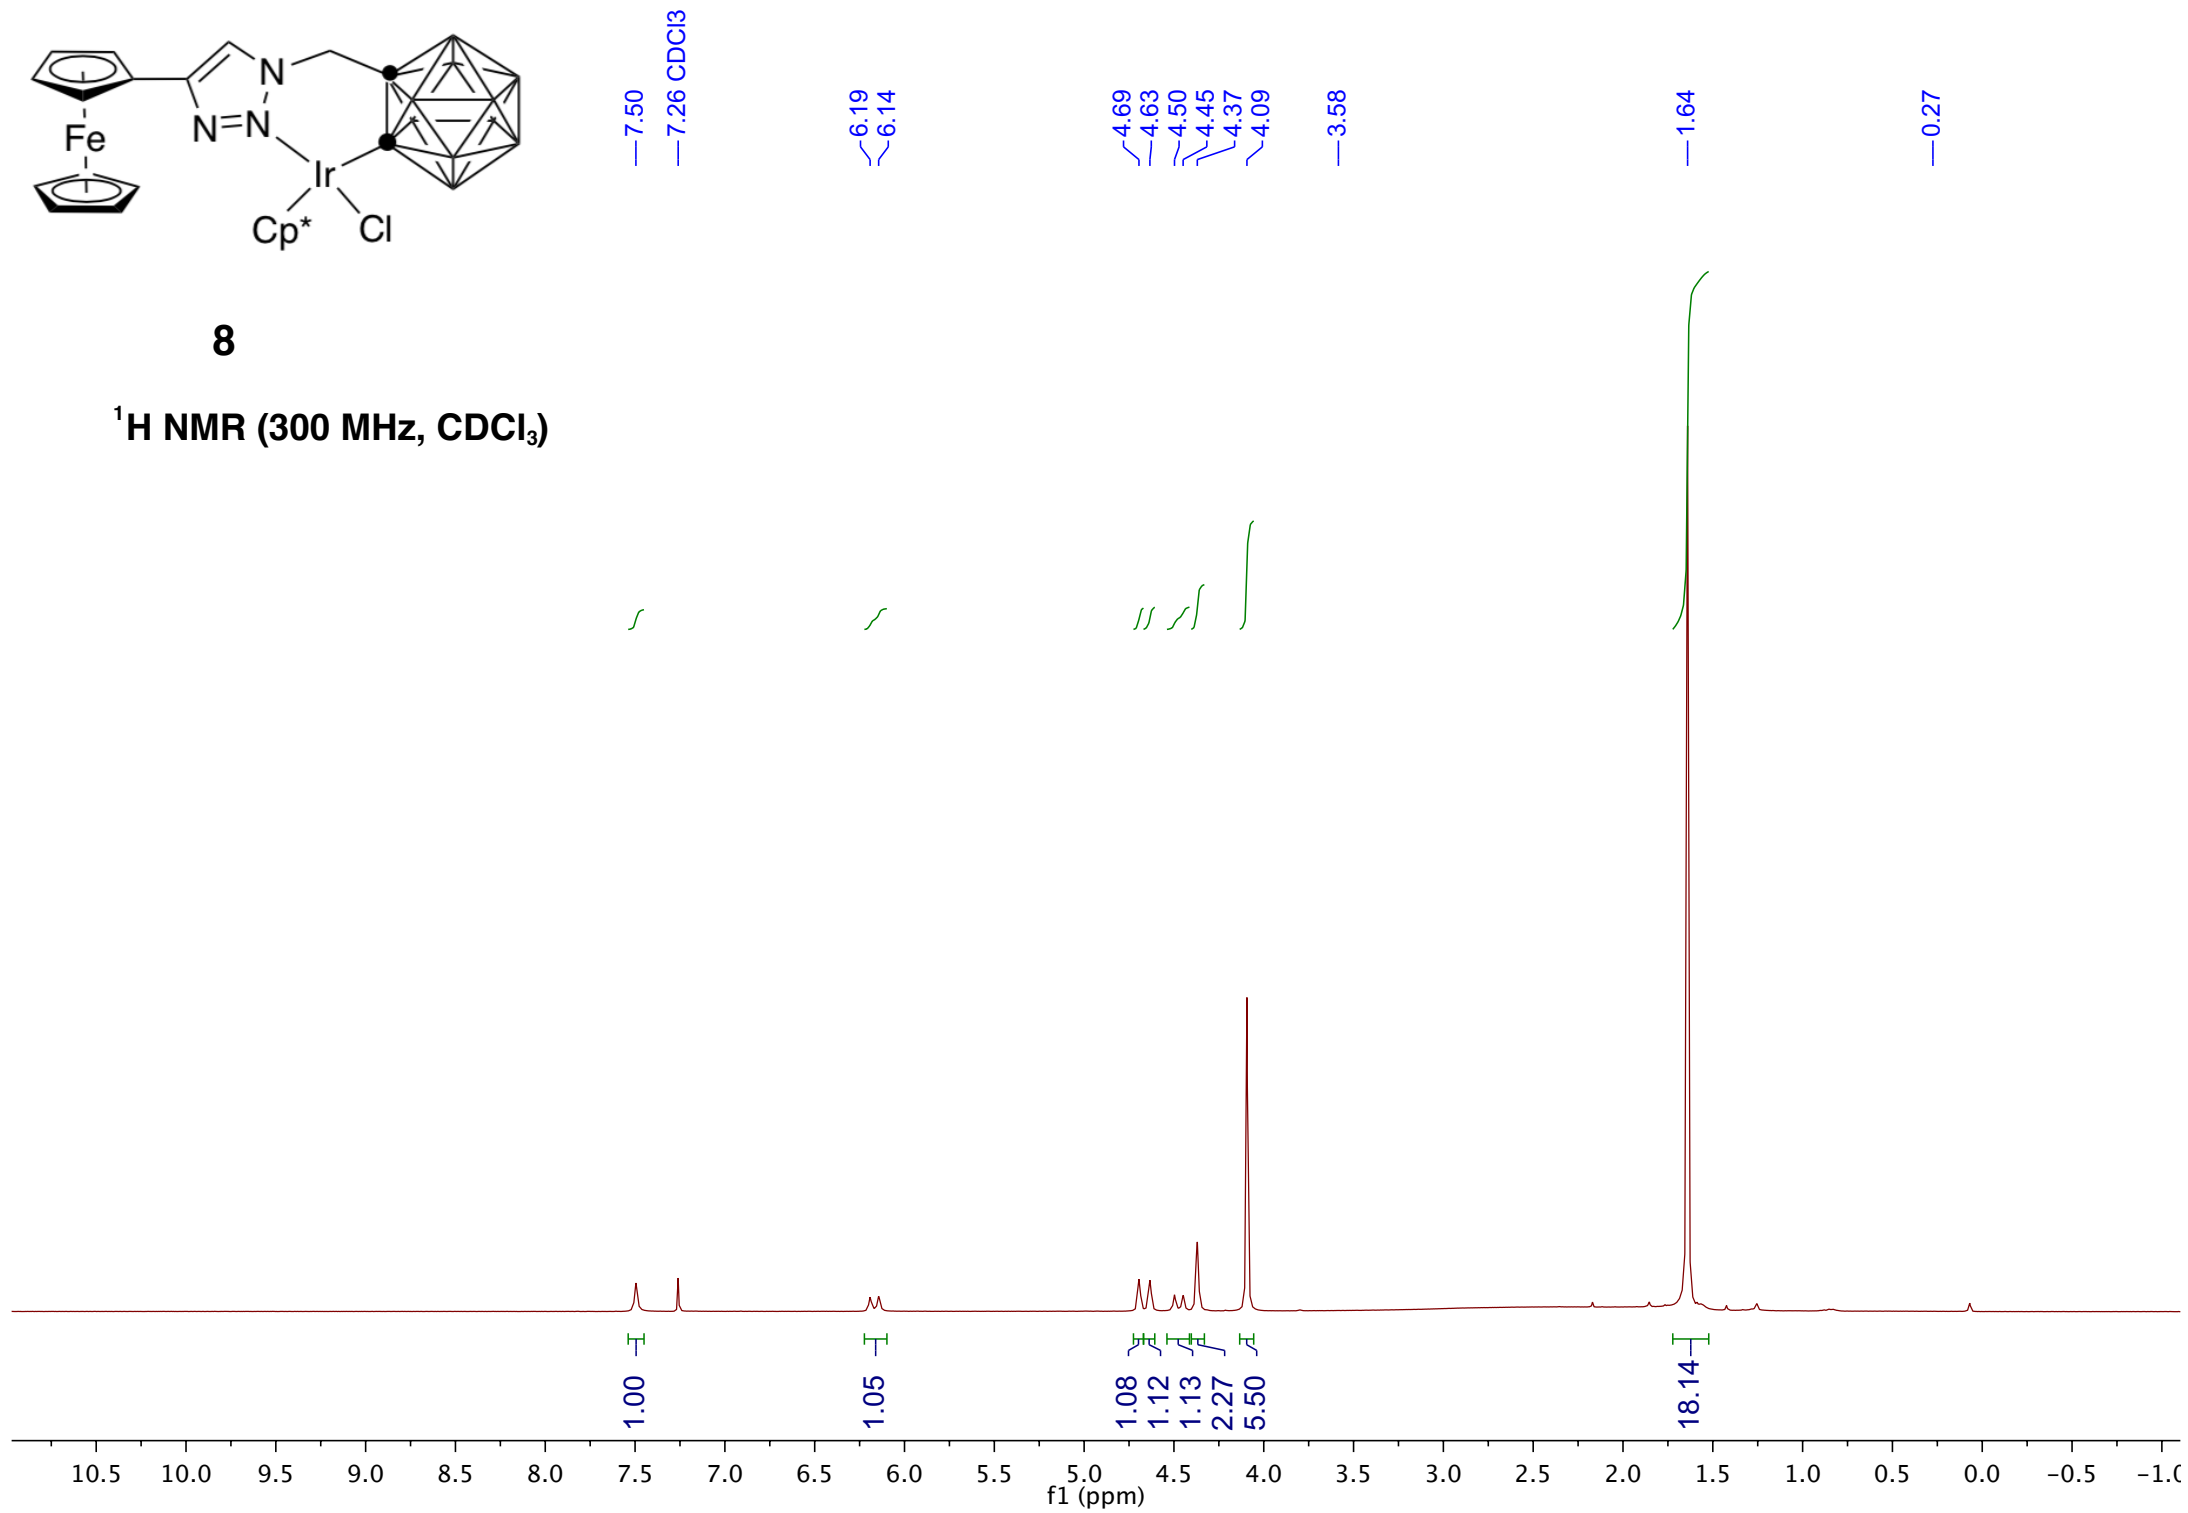

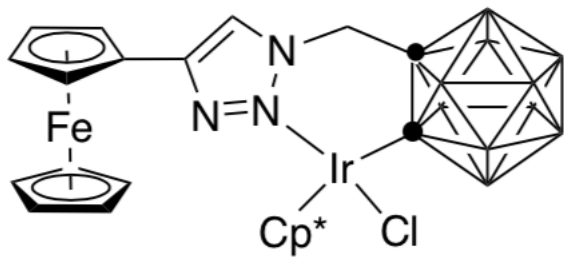

**8**

**$^{13}\text{C}\{^1\text{H}\}$  NMR (75 MHz,  $\text{CDCl}_3$ )**

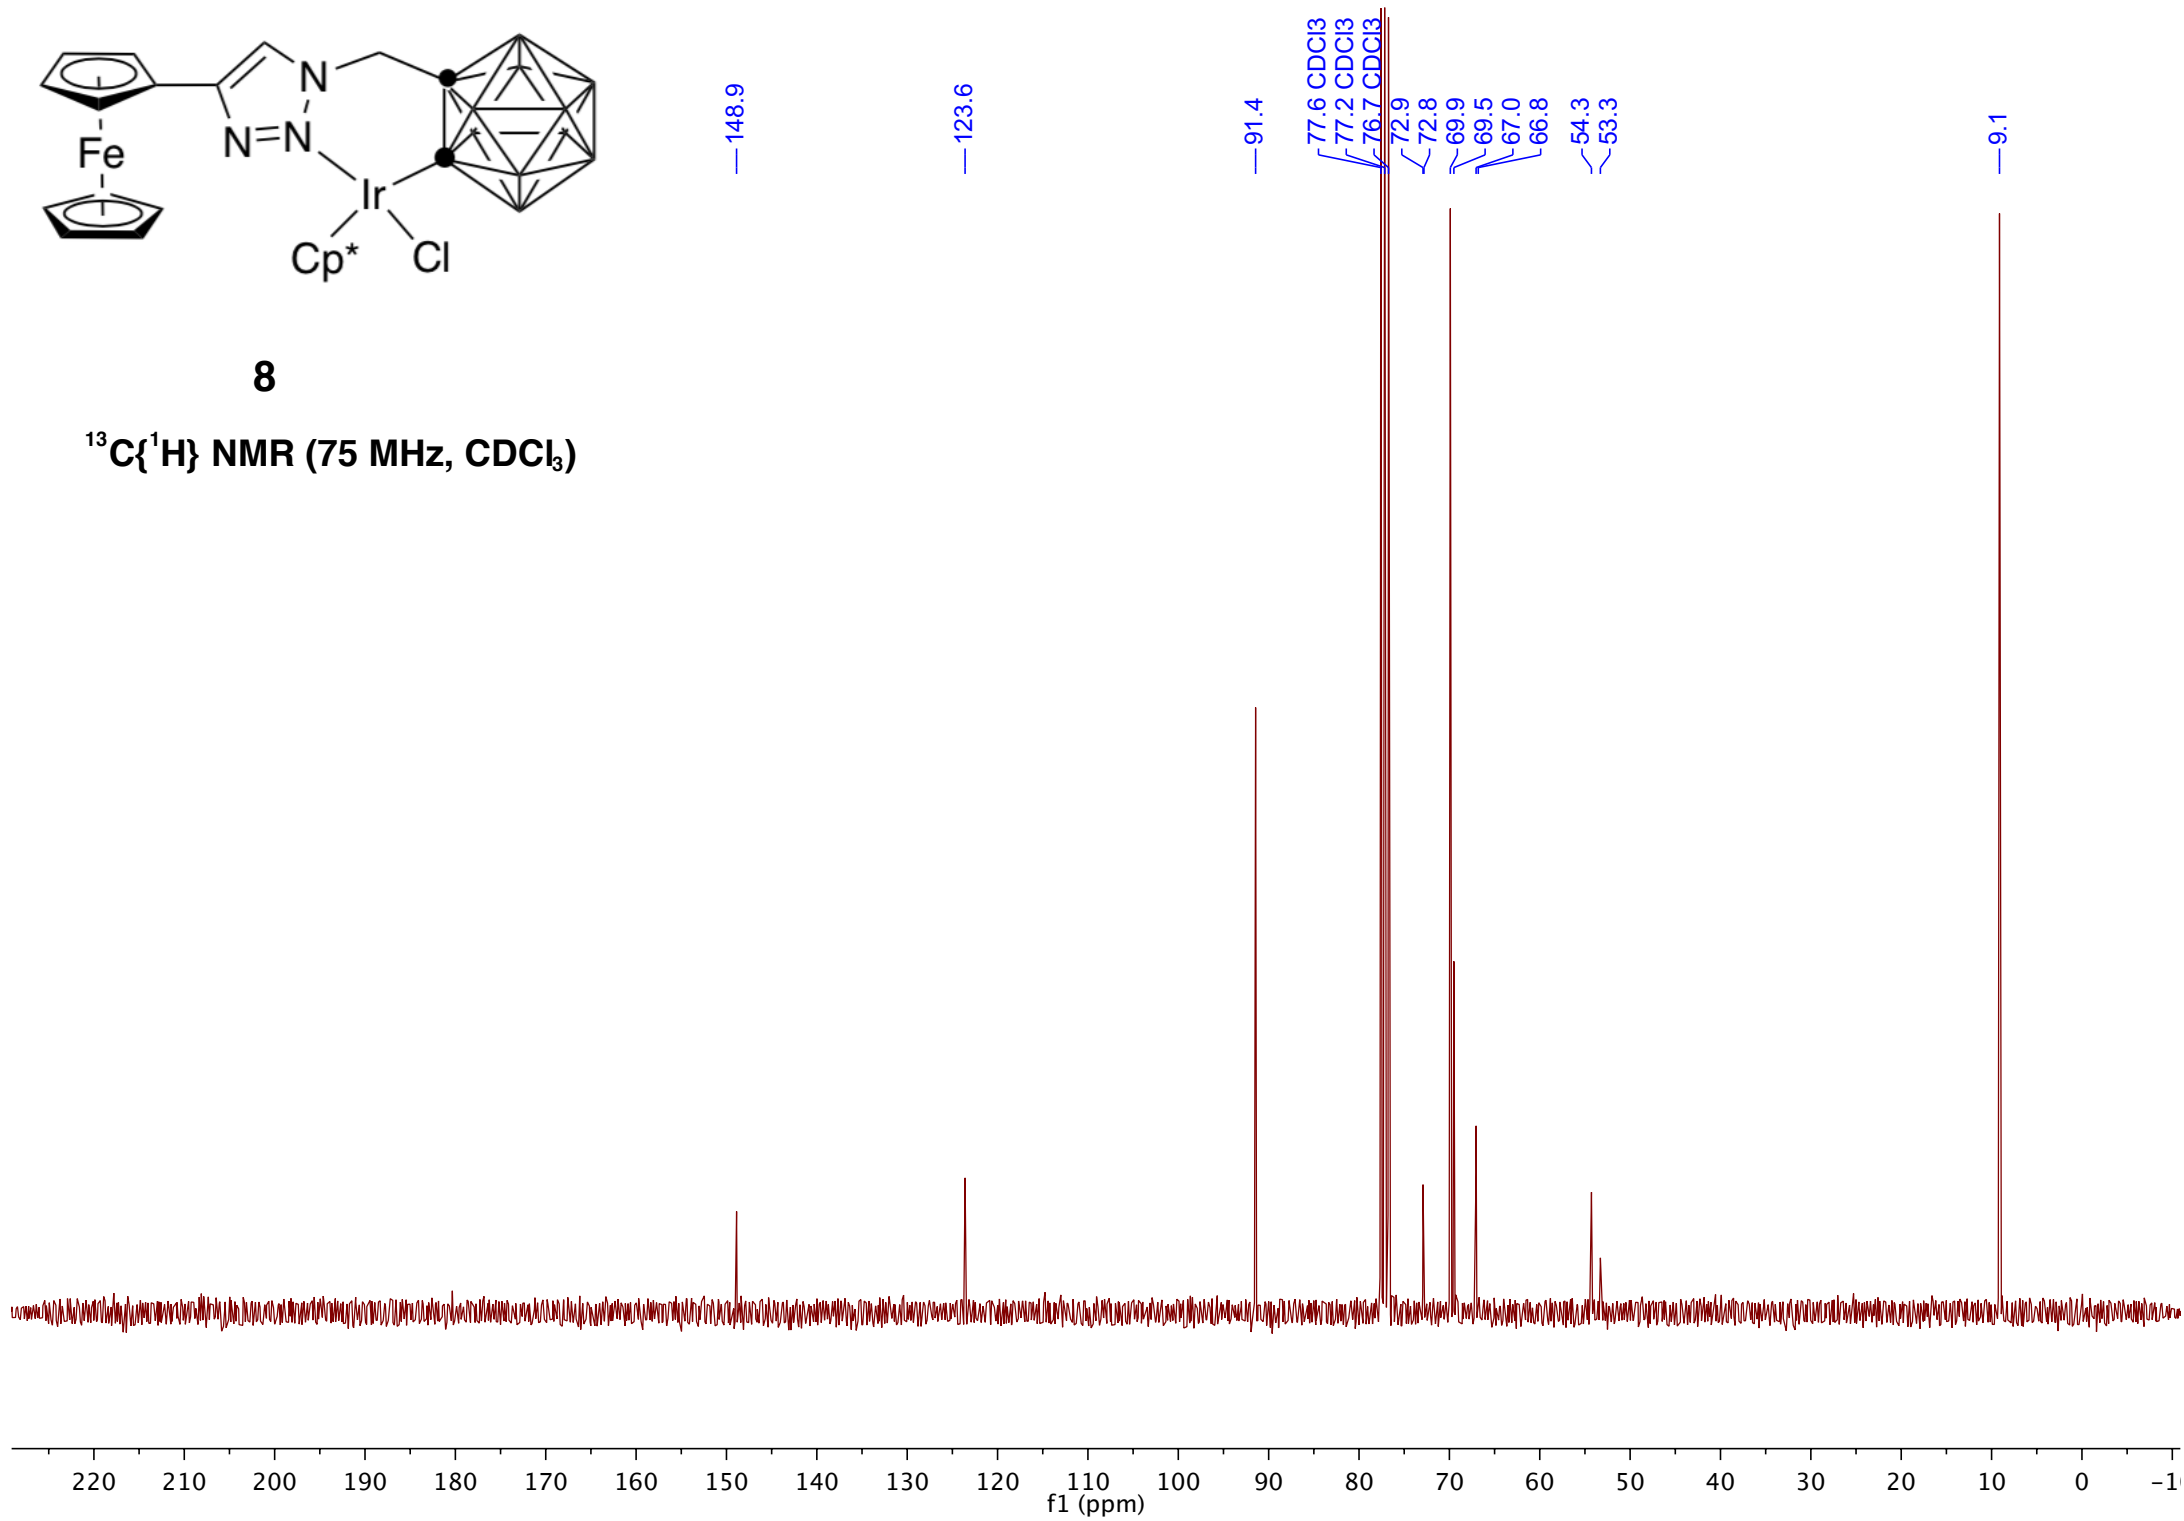



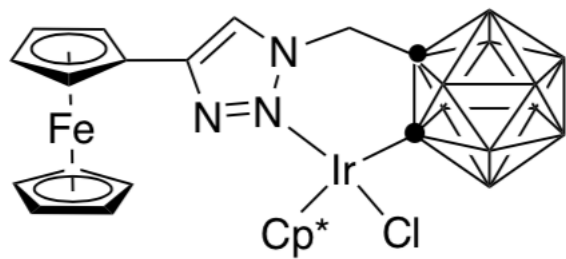

**8**

$^{11}\text{B}\{^1\text{H}\}$  NMR (160 MHz,  $\text{CDCl}_3$ )

~2.5  
~3.8  
~7.1  
~7.9  
~9.1  
~10.0  
~11.7

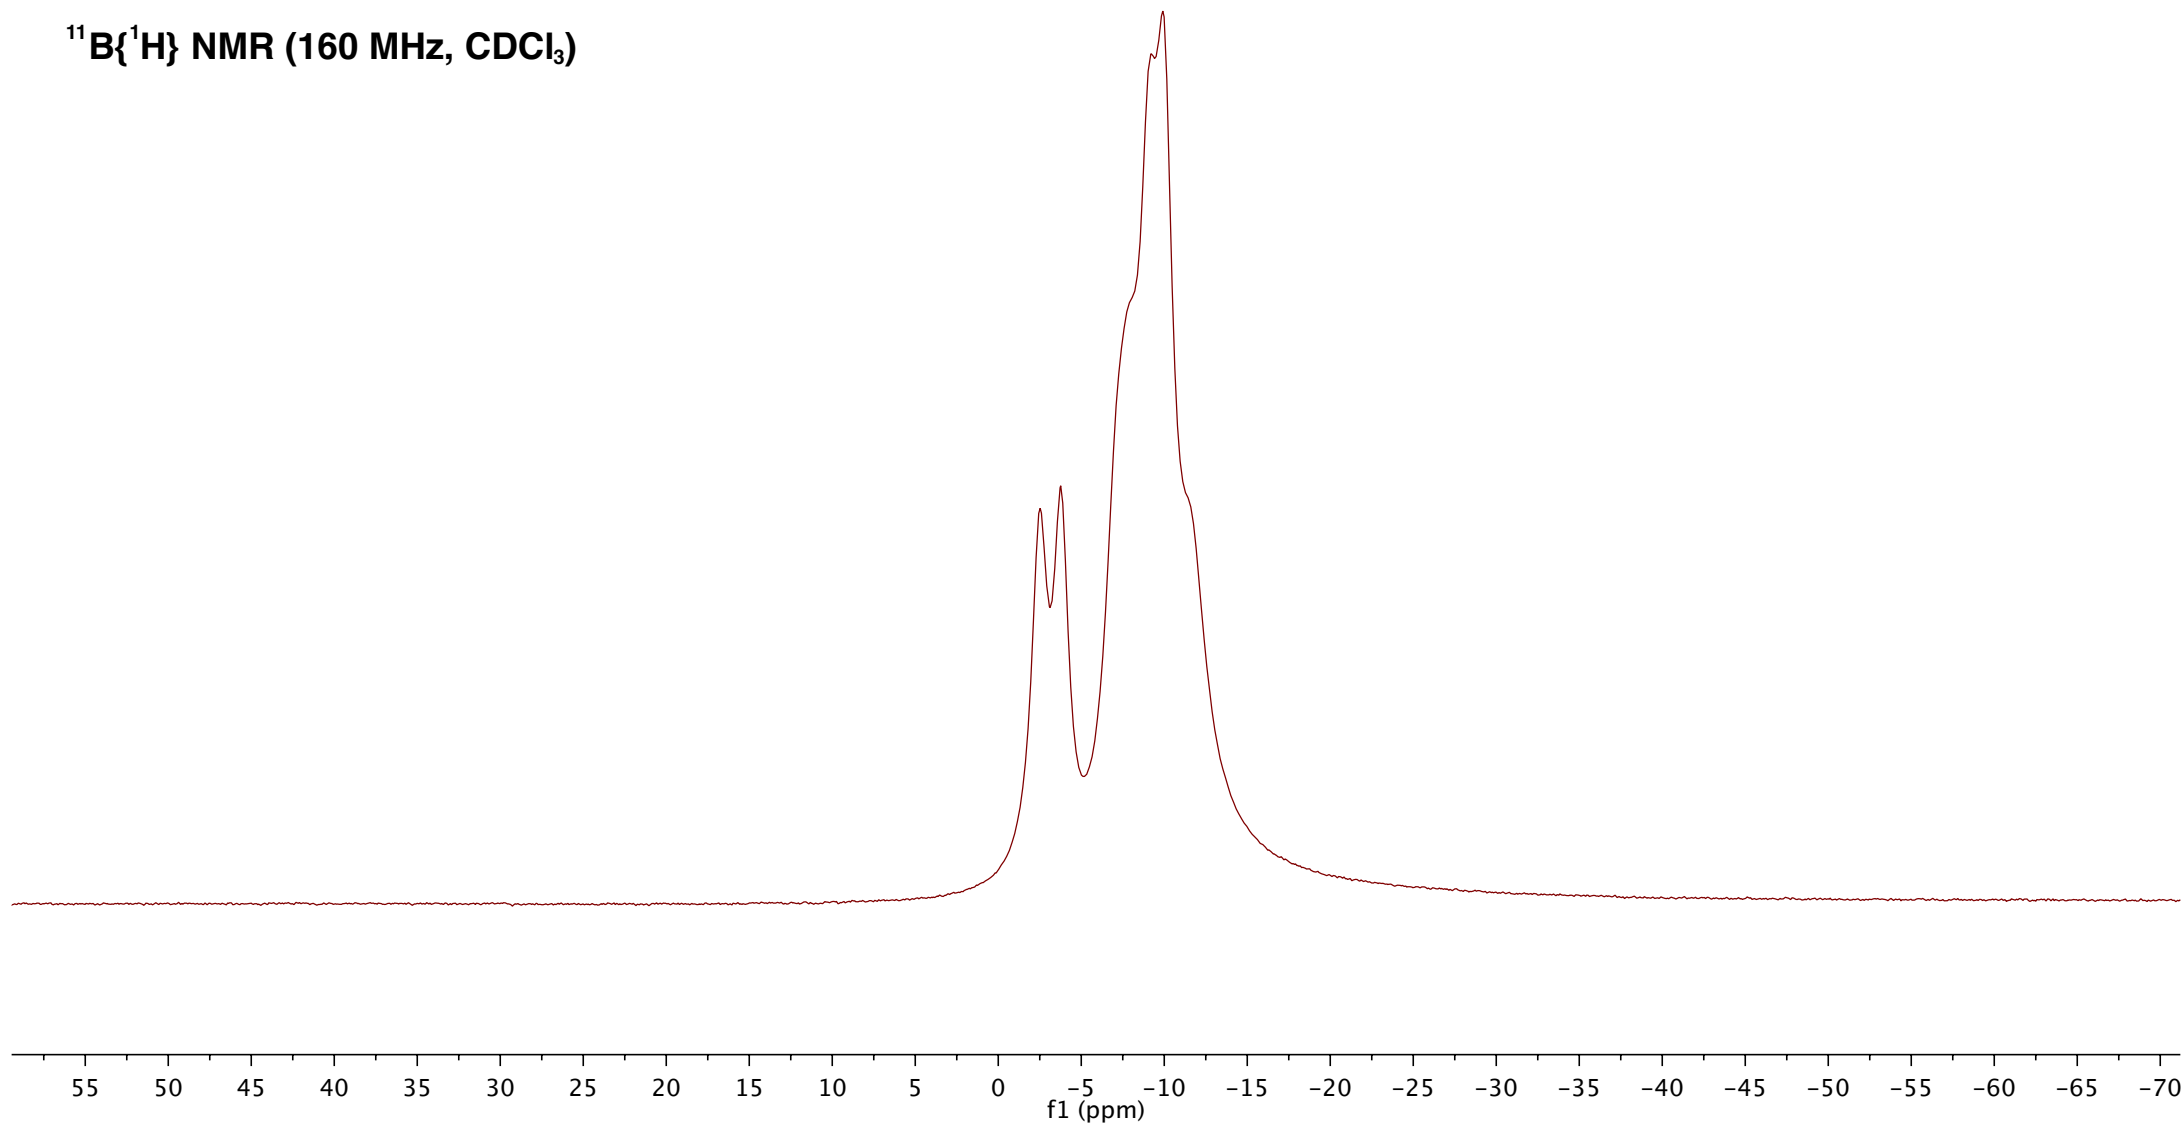

Supplement: c8dt02296h1.pdf [file c8dt02296h1.pdf]
